# Supplementary material for: Development and evaluation of an autism pig model
Source: Research Square preprint supplement (doi:10.21203/rs.3.rs-4356526/v1), 2024-05-30
Supplement: Supplementary file 1 [file 55dec25aa28a3fff0f659e4c.xlsx]

## Sheet: Fig. 1
Suppl. Table S3, Summary of statistics.
Fig. 1	Parameter	Condition	Piglet individual (n)	Value	Passed normality test ?	Mean	SEM	P value
Fig. 1e	Brain weight (g)	Con		22				Unpaired t-test, Two-tailed, P < 0.0001
			3	23	Yes	22	0.816497
				21
		VPA		10
				11.9
				10.5
			6	11.2	Yes	11.8	1.28841
				13
				14
				12
Fig. 1f	Brain length (cm)	Con		8.5			0.62361	Unpaired t-test, Two-tailed, P < 0.01
			3	9.5	Yes	8.667
				8
		VPA		6		6.214	0.920293
				6
				5
			6	5	Yes
				7.5
				7
				7
Fig. 1g	Brain circumference (cm)	Con		16.2		16.6667	0.524934	Unpaired t-test, Two-tailed, P < 0.01
			3	17.4	Yes
				16.4
		VPA		12		13.6286	0.86967
				13
				13.5
			6	14	Yes
				15
				14
				13.9
Fig. 1h	Body length (cm)	Con		18		8.667	2.16025	Unpaired t-test, Two-tailed, P < 0.01
			3	22	Yes
				23
		VPA		14		6.214	1.98977
				14
				14
			6	18	Yes
				18
				13
				17

## Sheet: Fig. 2
Fig. 2	Parameter		Condition	Piglet individual (n)	Value	Passed normality test ?	Mean	SEM	P value
Fig. 2b	Frontfoot stride (cm)	Con	FL	7	24	Yes	24.5714	0.743955	Paired t-test, Two-tailed, P = 0.4313
					24.8
					24.5
					25
					25.5
					23.1
					25.1
			FR	7	22	Yes	24.1143	1.14945
					23.5
					24.3
					26
					24
					25
					24
		VPA	FL	6	21	Yes	21.5167	0.929904	Paired t-test, Two-tailed, P < 0.01
					22.5
					20.6
					20.3
					22
					22.7
			FR	6	23.6	Yes	24.9	0.881287
					24.6
					26.1
					25.3
					25.7
					24.1
	Hindfoot stride (cm)	Con	RL	7	23.2	Yes	24.6857	1.23106	Paired t-test, Two-tailed, P = 0.9474
					26.5
					24.1
					25
					25
					26
					23
			RR	7	24.7	Yes	24.6429	0.810392
					23.7
					25.5
					24
					24
					26.1
					24.5
		VPA	RL	6	23	Yes	24.4667	0.915909	Paired t-test, Two-tailed, P < 0.01
					24.5
					26
					24
					25
					24.3
			RR	6	21	Yes	21.2	0.70946
					22
					20
					20.7
					21.6
					21.9
Fig. 2d	Time in center (s)		Con	8	142	Yes	148	36	Unpaired t-test, Two-tailed, P < 0.05
					131
					219
					125
					120
					103
					188
					156
			VPA	6	103	Yes	29.0769	49.085
					159
					45
					35
					60
					150
Fig. 2f	Sniffing latency (s)		Con	7	13	Yes	15	7.17137	Unpaired t-test, Two-tailed, P < 0.01
					10
					10
					7
					19
					16
					30
			VPA	6	59	Yes	44.8333	16.0563
					44
					60
					14
					37
					55
	Sniffing number		Con	8	14	Yes	13.5	5.83095	Unpaired t-test, Two-tailed, P = 0.176
					13
					10
					16
					26
					4
					11
					14
			VPA	6	10	Yes	18.5	6.13052
					28
					17
					16
					25
					15
	Sniffing time (%)	Yellow dog	Con	8	35.0649	Yes	45.5025	28.7777	Unpaired t-test, Two-tailed, P = 0.803
					0
					50.8333
					54.5455
					32.5714
					100
					16.6667
					17.8218
			VPA	6	28.125	Yes	42.0047	15.4087
					36.5957
					66.0969
					56.3452
					21.6312
					43.2343
		Green ball	Con	8	40.9091	Yes	26.0974	12.8316	Unpaired t-test, Two-tailed, P = 0.2769
					42.1569
					30.8333
					14.6853
					28
					0
					25.7576
					27.7228
			VPA	6	7.8125	Yes	18.3852	10.3927
					30.2128
					24.5014
					15.736
					29.078
					2.9703
		Blue dragon	Con	8	22.7273	Yes	21.8147	17.6019	Unpaired t-test, Two-tailed, P = 0.7257
					57.8431
					0
					25.1748
					25.1429
					0
					13.6364
					33.6634
			VPA	6	25	Yes	19.1719	9.90784
					24.0425
					2.849
					9.13706
					31.5603
					22.4422
		Red ball	Con	8	1.2987	Yes	6.58536	14.0438	Unpaired t-test, Two-tailed, P = 0.7806
					0
					18.3333
					5.59441
					14.2857
					0
					43.9394
					20.7921
			VPA	6	39.0625	Yes	20.4383	11.5205
					9.14894
					6.55271
					18.7817
					17.7305
					31.3531
Fig. 2h	Latency to find platform (s)	Con	day1	8	59.2857	Yes	45.596	9.5287	Two-way ANOVA, P < 0.05
					41.7143
					28.4286
					44.7143
					60
					45.75
					43.125
					41.75
			day2	8	35.5714	Yes	40.1481	8.04452
					45.6667
					25.2857
					36.2857
					41.125
					50.625
					50.375
					36.25
			day3	8	31.1429	Yes	33.8884	6.83813
					29.7143
					30.4286
					22.5714
					47.5
					37.625
					36.5
					35.625
			day4	8	31.4286	Yes	31.6741	6.70659
					21.4286
					23.2857
					27
					39.25
					40.625
					34.75
					35.625
		VPA	day1	8	57.3333	Yes	51.3205	7.99617
					55.8333
					40.3333
					35.8333
					60
					54.3846
					54.0769
					52.7692
			day2	8	41.1667	Yes	42.5401	8.37952
					40.6667
					37.5
					26.8333
					57.4615
					48.5385
					47.3077
					40.8462
			day3	8	35.1667	Yes	36.8285	4.40633
					36.5
					46.6667
					37.8333
					34.5385
					39.3846
					33.0769
					31.4615
			day4	8	36.6667	Yes	32.9776	4.81752
					35
					21.3333
					34.6667
					32.6154
					35.3077
					37.3846
					30.8462
	Time in center (s)		Con	15	24	Yes	30.3333	10.222	Unpaired t-test, Two-tailed, P = 0.1281
					8
					34
					15
					23
					28
					29
					43
					38
					22
					35
					32
					44
					44
					36
			VPA	18	25	Yes	24.3889	10.8019
					16
					11
					29
					6
					3
					28
					40
					35
					24
					20
					28
					28
					28
					47
					16
					29
					26

## Sheet: Fig. 3
Fig. 3	Parameter		Condition	Piglet individual (n)	Value	Passed normality test ?	Mean	SEM	P value
Fig. 3b	Latency to attack (s)		Con	8	22	Yes	14.375	9.12329	Mann-Whitney test, Two-tailed, P = 0.9805
					33
					18
					6
					14
					9
					3
					10
			VPA	9	11	No	15.3333	11.6714
					17
					15
					15
					8
					9
					47
					8
					8
	Attack time (s)		Con	8	0	Yes	3.625	3.96666	Mann-Whitney test, Two-tailed, P = 0.2507
					5
					5
					0
					10
					0
					9
					0
			VPA	12	60	No	14.4167	20.0851
					2
					0
					0
					22
					0
					2
					52
					0
					21
					7
					7
	Total sniffing time (s)		Con	8	113	Yes	157.125	57.8348	Unpaired t-test, Two-tailed, P = 0.5528
					283
					160
					194
					159
					75
					137
					136
			VPA	12	162	Yes	176.083	69.5862
					217
					220
					49
					90
					98
					139
					161
					296
					225
					207
					249
	Sniffing time (%)	Attack	Con	8	0	Yes	2.2188	2.6508	Unpaired t-test, Two-tailed, P = 0.1728
					1.76678
					3.125
					0
					6.28931
					0
					6.56934
					0
			VPA	12	37.037	Yes	9.30553	13.1741
					0.921659
					0
					0
					24.4444
					0
					1.43885
					32.2981
					0
					9.33333
					3.38164
					2.81124
		Tail	Con	8	26.5487	Yes	18.6318	8.23221	Unpaired t-test, Two-tailed, P = 0.1728
					23.6749
					30
					26.2887
					11.9497
					9.33333
					8.75912
					12.5
			VPA	12	17.284	Yes	12.3949	9.68403
					5.06912
					16.8182
					40.8163
					6.66667
					11.2245
					0.719424
					8.69565
					9.7973
					8
					14.0097
					9.63855
		Body	Con	8	32.7434	Yes	28.0671	5.84704	Unpaired t-test, Two-tailed, P < 0.01
					31.8021
					21.25
					26.8041
					24.5283
					28
					20.438
					38.9706
			VPA	12	39.5062	Yes	49.303	15.7054
					41.4746
					59.0909
					28.5714
					66.6667
					66.3265
					29.4964
					31.0559
					72.2973
					65.3333
					37.1981
					54.6185
		Head	Con	8	40.708	Yes	51.0823	8.4828	Unpaired t-test, Two-tailed, P < 0.01
					42.7562
					45.625
					46.9072
					57.2327
					62.6667
					64.2336
					48.5294
			VPA	12	6.17284	Yes	28.9965	18.1538
					52.5346
					24.0909
					30.6122
					2.22222
					22.449
					68.3453
					27.9503
					17.9054
					17.3333
					45.4106
					32.9317
	Sniffing latency (s)		Con	8	17	Yes	14.125	7.91261	Unpaired t-test, Two-tailed, P = 0.8877
					5
					20
					27
					5
					4
					17
					18
			VPA	6	21	Yes	13.5	6.72681
					5
					12
					17
					21
					5
	Interaction time (s)	Toy	Con	8	26	Yes	21.625	11.0673	Con (Toy) vs Con (S1)
					17				Paired t-test,
					35				Two-tailed,
					22				P < 0.01
					6
					39
					7
					21
			VPA	6	28	Yes	41.6667	27.8129	VPA (toy) vs VPA (S1)
					11				Paired t-test,
					95				Two-tailed,
					48				P < 0.05
					18
					50
		S1	Con	8	40	Yes	102	43.4245	Con (toy) vs VPA (Toy)
					160				Unpaired t-test,
					106				Two-tailed,
					112				P = 0.1121
					152
					65
					79
					40
			VPA	6	26	Yes	94.1667	45.8164	Con (S1) vs VPA (S1)
					109				Unpaired t-test,
					176				Two-tailed,
					107				P = 0.9975
					71
					76
Fig. 3f	Sniffing latency (s)		Con	8	493	Yes	417.375	266.854	Unpaired t-test, Two-tailed, P < 0.01
					710
					160
					246
					115
					608
					157
					850
			VPA	6	82	Yes	153.667	66.5424
					117
					281
					100
					185
					157
	Interaction time (s)	S1	Con	7	19	Yes	20.1429	15.1604	Con (S1) vs Con (S2)
					27				Paired t-test,
					49				Two-tailed,
					25				P < 0.01
					3
					18
					0
			VPA	6	8	Yes	19.5	16.7407	VPA (S1) vs VPA (S2)
					5				Mann-Whitney test
					55				Two-tailed,
					22				P < 0.01
					14
					13
		S2	Con	7	113	Yes	106.571	36.8272	Con (S1) vs VPA (S1)
					66				Unpaired t-test,
					62				Two-tailed,
					105				P = 0.9479
					84
					161
					155
			VPA	6	108	NO	168.5	119.919	Con (S2) vs VPA (S2)
					436				Mann-Whitney test
					117				Two-tailed,
					102				P = 0.2949
					120
					128

## Sheet: Fig. 4
Fig. 4	Parameter		Condition	Piglet individual (n)	Value	Passed normality test ?	Mean	SEM	P value
Fig. 4b	Brain weight/body weight (%)		Con	3	0.247	Yes	0.238667	0.0124989	Unpaired t-test, Two-tailed, P < 0.05
					0.248
					0.221
			VPA	3	0.206	Yes	0.200333	0.0054365
					0.202
					0.193
Fig. 4c	Cortical height (mm)		Con	3	34.36	Yes	35.2433	0.658399	Unpaired t-test, Two-tailed, P = 0.17
					35.43
					35.94
			VPA	3	35.05	Yes	32.76	1.96576
					32.98
					30.25
	Cortical length (mm)		Con	3	60	Yes	60.4	0.284722	Unpaired t-test, Two-tailed, P = 0.22
					60.64
					60.56
			VPA	3	61.39	Yes	57.4867	3.01138
					57.01
					54.06
	Cortical width (mm)		Con	3	25.92	Yes	25.5633	0.384216	Unpaired t-test, Two-tailed, P = 0.06
					25.74
					25.03
			VPA	3	22.96	Yes	23.7867	0.894961
					23.37
					25.03
Fig. 4e	M1-Surface area (cm2)		Con	3	0.8925	Yes	0.918	0.0374856	Unpaired t-test, Two-tailed, P < 0.01
					0.8905
					0.971
			VPA	3	0.437	Yes	0.540833	0.0825634
					0.5465
					0.639
Fig. 4f	PFC-Surface area (cm2)		Con	3	3.279	Yes	3.37783	0.120183	Unpaired t-test, Two-tailed, P < 0.05
					3.547
					3.3075
			VPA	3	3.107	Yes	2.69083	0.294278
					2.4845
					2.481
Fig. 4g	Temporal lobe-Surface area (cm2)	Temporal lobe (total)	Con	3	10.892	Yes	11.2053	0.222971	Unpaired t-test, Two-tailed, P = 0.39
					11.3313
					11.3927
			VPA	3	9.41233	Yes	10.577	0.886949
					11.5627
					10.756
		STG	Con	3	2.442	Yes	2.37278	0.103843	Unpaired t-test, Two-tailed, P = 0.21
					2.45033
					2.226
			VPA	3	3.09867	Yes	2.73667	0.327906
					2.80667
					2.30467
		MTG	Con	3	3.09067	Yes	3.02278	0.0860735	Unpaired t-test,Two-tailed, P = 0.57
					2.90133
					3.07633
			VPA	3	2.73267	Yes	3.27356	0.566406
					4.05567
					3.03233
		ITG	Con	3	3.40033	No	3.68722	0.202892	Mann-Whitney test, Two-tailed, P = 0.7
					3.835
					3.82633
			VPA	3	2.52167	Yes	3.19544	0.564725
					3.90367
					3.161

## Sheet: Fig. 5
Fig. 5	Parameter		Condition	Piglet individual (n)	Value	Passed normality test ?	Mean	SEM	P value
Fig. 5b	Area of neuron soma (μm2)		Con	3 (neuron: 30)	1180.462 673.878 791.454 751.142 540.849 659.097 524.053 902.983 957.404 763.236 823.703 410.508 380.274 436.039 319.135 962.107 789.438 448.804 729.643 925.826 932.545 549.583 556.974 726.283 702.096 662.456 501.209 558.99 991.669 538.834	Yes	689.7	407.167	Unpaired t-test, Two-tailed, P < 0.001
			VPA	3 (neuron: 53)	1027.949 1083.042 855.953 757.861 1509.003 569.739 1205.321 653.05 1265.789 1728.03 907.686 1663.531 1031.309 829.078 1190.54 900.296 706.799 552.271 1210.696 935.904 792.798 798.173 1527.815 804.891 1049.449 637.597 527.412 625.504 733.002 874.765 773.314 1483.472 1920.183 426.633 1190.54 651.707 1396.13 940.607 961.435 751.142 749.798 391.024 331.9 234.48 395.727 1332.975 917.092 705.456 1483.4…	Yes	985.1	207.058			Basal dendrite
												Con																Mean	SEM		VPA																	Mean	SEM
Fig. 5d	Basal dendrite	Number of intersection	Con	3 (neuron: 16)		Yes			Two-way ANOVA, P < 0.0001		20	6	3	5	5	4	4	8	3	3	2	6	3	3	4	6	5	4.375	1.53603		4	4	2	4	4	5	3	5	4	3	2	4	2	5	6	2	4	3.70588	1.17647
											40	8	6	7	8	5	4	9	4	4	7	8	6	5	8	11	5	6.5625	1.96751		5	5	2	7	5	10	5	5	7	7	3	5	4	6	8	3	8	5.58824	2.00173
											60	9	6	10	10	6	7	11	8	4	12	10	10	9	7	15	9	8.9375	2.56098		11	5	7	11	7	11	5	6	7	8	6	6	5	7	11	6	12	7.70588	2.39521
			VPA	3 (neuron: 17)							80	9	11	10	13	8	8	12	12	6	13	11	14	12	11	15	11	11	2.29129		8	7	6	11	9	11	9	6	8	9	6	7	9	8	12	10	12	8.70588	1.93314
											100	13	14	11	11	8	12	11	12	7	14	18	14	12	14	17	12	12.5	2.7157		10	8	10	10	7	12	9	8	7	10	6	11	13	7	12	8	13	9.47059	2.14525
											120	16	12	13	12	9	12	10	14	7	16	22	13	11	20	17	12	13.5	3.79144		9	10	9	9	8	11	8	7	7	10	8	9	11	9	8	5	8	8.58824	1.45759
		Total dentrite length (μm)	Con	3 (neuron: 16)	3760.598 3179.969 4339.3 3066.119 2952.626 3528.782 2385.994 2469.679 2167.274 3636.007 4500.028 2821.813 4198.9 2791.328 3755.117 2555.444	Yes	3257	703.668	Unpaired t-test, Two-tailed, P < 0.0001		140	20	14	15	11	9	15	11	14	8	13	23	11	13	18	13	12	13.75	3.78319		8	8	9	11	8	8	6	7	6	10	9	7	10	6	8	1	7	7.58824	2.1709
											160	22	11	16	9	11	6	11	13	9	13	23	9	16	14	12	12	12.9375	4.40835		5	6	8	10	8	5	4	7	2	6	8	6	6	6	5	1	5	5.76471	2.12905
											180	19	11	16	7	10	6	11	12	7	11	22	7	12	10	12	10	11.4375	4.22742		4	7	5	9	9	2	3	7	2	1	5	4	7	7	2	0	4	4.58824	2.65815
			VPA	3 (neuron: 17)	1788.869 2055.011 1591.77 1848.617 1777.541 1942.127 1387.535 1780.418 1256.701 1368.339 1954.07 1955.533 1757.721 1825.681 1688.09 954.623 2135.66	Yes	1710	300.57			200	15	13	15	3	10	6	12	10	6	8	17	7	10	6	8	8	9.625	3.77285		3	6	4	7	6	2	2	6	1	0	8	4	3	7	0	0	3	3.64706	2.56541
											220	11	8	14	3	7	4	11	9	6	9	14	5	8	4	8	3	7.75	3.4187		1	4	1	1	2	2	2	4	1	0	4	2	2	5	0	0	3	2	1.49509
											240	5	8	13	1	8	3	7	5	7	8	9	4	8	1	6	2	5.9375	3.13187		0	0	0	0	0	0	0	0	0	0	1	3	1	3	0	0	3	0.647059	1.13455
Fig. 5e	Apical dendrite	Number of intersection	Con	3 (neuron: 16)		Yes			Two-way ANOVA, P < 0.05		260	1	6	10	1	5	2	5	3	6	6	5	4	7	0	5	1	4.1875	2.60333		0	0	0	0	0	0	0	0	0	0	0	2	1	1	0	0	3	0.411765	0.844276
											280	1	3	8	1	2	1	3	2	10	5	3	3	7	0	4	1	3.375	2.73576		0	0	0	0	0	0	0	0	0	0	0	0	0	0	0	0	0	0	0
											300	1	1	7	1	1	1	1	1	7	3	1	2	5	0	3	0	2.1875	2.18571		0	0	0	0	0	0	0	0	0	0	0	0	0	0	0	0	0	0	0
			VPA	3 (neuron: 17)							340	1	1	5	1	1	1	1	1	6	3	1	2	5	0	1	0	1.875	1.79844		0	0	0	0	0	0	0	0	0	0	0	0	0	0	0	0	0	0	0
											Apical dendrite
		Total dentrite length (μm)	Con	3 (neuron: 16)	2007.438 1428.705 1188.514 1446.536 1451.437 1862.205 1607.015 1893.718 1572.37 1470.471 1700.642 1546.222 884.315 729.574 1887.005 1219.881	Yes	1494	345.612	Unpaired t-test, Two-tailed, P < 0.01			Con																Mean	SEM		VPA																	Mean	SEM
											20	1	3	1	1	1	1	2	3	1	1	1	1	1	1	2	1	1.375	0.695971		1	1	1	1	2	1	1	1	1	1	1	1	1	1	1	3	1	1.17647	0.512812
											40	5	3	1	1	1	2	2	2	1	1	4	2	1	2	2	2	2	1.11803		4	1	1	1	2	1	3	1	1	2	1	1	2	1	2	4	1	1.70588	1.01545
			VPA	3 (neuron: 17)	827.342 909.888 1448.712 1249.943 584.015 593.875 1612.833 1143.253 600.858 1018.428 991.137 2094.842 707.118 493.349 883.053 901.05 1167.077	Yes	1013	404.755			60	5	3	1	2	2	3	2	3	1	2	4	3	1	2	5	2	2.5625	1.22315		3	1	2	2	2	1	4	2	1	2	1	2	2	1	3	4	2	2.05882	0.937493
											80	5	3	2	2	3	3	3	5	1	2	5	3	1	2	6	4	3.125	1.45237		2	1	2	3	2	1	4	2	2	4	1	2	2	1	2	4	3	2.23529	1.00173
											100	5	3	2	3	2	3	4	4	2	2	5	3	1	2	8	6	3.4375	1.76666		2	1	3	4	4	1	4	3	2	4	1	3	2	1	2	3	3	2.52941	1.09101
Fig. 5j	Spine number per 10 μm		Con	3 ( dentrite: 22)	7.407818953 4.231610128 4.493194132 5.472092329 9.513173677 8.788890842 10.24688591 10.07421337 7.854719115 11.27210389 7.725189267 7.301441359 5.550587437 5.591386664 8.153477218 4.903262713 6.585136406 7.246376812 8.82746097 11.4859691 10.60396496 6.914433881	Yes	4.10463	2.43	Unpaired t-test, Two-tailed, P < 0.01		120	8	3	2	4	4	3	4	2	2	2	3	3	2	2	9	7	3.75	2.19374		2	2	5	6	4	1	4	3	3	4	1	3	2	2	2	2	1	2.76471	1.3945
											140	5	3	2	5	4	3	4	2	2	2	3	2	2	1	8	8	3.5	2.03101		1	2	5	7	4	1	2	3	3	4	3	6	2	2	2	1	1	2.88235	1.74499
											160	5	4	2	3	4	4	3	1	3	2	3	4	2	2	6	3	3.1875	1.23586		1	2	5	6	3	1	3	3	2	5	2	4	1	1	3	1	1	2.58824	1.57401
			VPA	3 ( dentrite: 23)	4.104625 3.162055 5.488018 5.071361 6.719062 6.959777 6.617372 6.1855 9.353322 7.774639 9.370973 6.761434 6.821282 4.988953 4.330645 4.525102 3.62871 5.01779 8.114558 6.260575 6.860925 6.546983 6.094077	Yes	3.16206	1.61			180	13	2	1	3	5	3	3	1	3	2	2	3	2	2	4	2	3.1875	2.72072		2	2	4	6	2	1	6	2	1	5	1	4	1	1	3	1	2	2.58824	1.717
											200	2	2	1	3	4	4	4	1	2	2	1	2	3	2	4	2	2.4375	1.05882		2	3	3	4	0	1	6	1	1	4	1	4	1	1	3	1	2	2.23529	1.5541
											220	2	2	1	3	5	4	3	1	2	2	2	4	3	2	3	2	2.5625	1.05882		2	2	3	2	0	1	4	2	1	3	1	4	1	1	1	1	2	1.82353	1.09734
	Spine number (%)	immature	Con	3 ( dentrite: 22)	0.175 0.083333333 0 0.181818182 0.173913043 0.1 0.125 0.3 0.24 0.1875 0.2 0.074074074 0.055555556 0.302325581 0.294117647 0.208333333 0.214285714 0.117647059 0.085714286 0.333333333 0.260869565 0.214285714	Yes	0.1785	0.09	Unpaired t-test, Two-tailed, P < 0.05		240	1	2	1	4	4	4	3	1	2	2	2	3	3	2	3	1	2.375	1.05327		2	3	3	2	0	1	4	2	1	3	1	3	1	1	1	1	2	1.82353	1.04236
											260	2	2	1	4	4	4	3	1	2	2	2	2	4	2	1	1	2.3125	1.1022		2	2	2	2	0	1	3	2	1	2	1	2	1	1	1	1	2	1.52941	0.696009
											280	2	2	1	3	5	6	3	1	3	2	3	1	4	2	1	1	2.5	1.45774		1	2	2	1	0	1	2	2	1	2	1	1	1	1	1	1	2	1.29412	0.570315
			VPA	3 ( dentrite: 23)	0.068966 0.1 0.060606 0.142857 0.212121 0.275862 0.304348 0.236842 0.277778 0.433333 0.291667 0.261905 0.214286 0.071429 0.3125 0.157895 0.133333 0.242424 0.176471 0.297297 0.441176 0.421053 0.4375	Yes	0.2422	0.11			300	1	2	1	2	3	4	3	2	3	2	3	1	4	2	1	1	2.1875	1.01358		2	2	2	0	0	1	2	2	1	1	1	2	1	1	2	1	1	1.29412	0.665512
											320	1	2	1	2	2	4	3	1	2	2	2	1	3	2	1	1	1.875	0.856957		2	1	1	0	0	1	1	2	1	1	2	2	1	1	2	1	1	1.17647	0.616946
											340	1	1	1	1	2	4	2	1	1	2	2	3	3	2	1	1	1.75	0.901388		2	2	2	0	0	1	1	2	0	1	2	2	1	2	2	1	1	1.29412	0.748701
		mature	Con	3 ( dentrite: 22)	0.825 0.916667 1 0.818182 0.826087 0.9 0.875 0.7 0.76 0.8125 0.8 0.925926 0.944444 0.697674 0.705882 0.791667 0.785714 0.882353 0.914286 0.666667 0.73913 0.785714	Yes	0.8215	0.09	Unpaired t-test, Two-tailed, P < 0.05		360	1	1	1	1	1	3	2	1	1	2	2	2	3	1	1	1	1.5	0.707107		1	2	2	0	0	1	1	2	0	0	2	2	1	2	2	2	1	1.23529	0.806548
											380	1	1	1	1	1	2	2	1	1	2	2	2	1	0	1	0	1.1875	0.634306		1	2	2	0	0	1	0	2	0	0	2	2	1	2	1	2	1	1.11765	0.83189
											400	1	1	1	1	1	1	2	1	1	1	2	2	1	0	1	0	1.0625	0.555512		1	2	2	0	0	1	0	2	0	0	2	1	2	0	1	1	1	0.941176	0.802246
			VPA	3 ( dentrite: 23)	0.931034 0.9 0.939394 0.857143 0.787879 0.724138 0.695652 0.763158 0.722222 0.566667 0.708333 0.738095 0.785714 0.928571 0.6875 0.842105 0.866667 0.757576 0.823529 0.702703 0.558824 0.578947 0.5625	Yes	0.7578	0.11			420	1	1	1	1	1	1	2	1	1	1	1	3	1	0	1	0	1.0625	0.658478		0	2	2	0	0	1	0	2	0	0	2	2	2	0	1	1	1	0.941176	0.872494
											440	1	1	1	1	1	1	2	1	1	1	1	3	1		1	0	1.13333	0.618241		0	2	2	0	0	1	0	2	0	0	2	2	2	0	0	1	2	0.941176	0.937493
											460	1	1	1	1	1	2	2	1	1	1	1	1	0	0	1	0	0.9375	0.555512		0	1	2	0	0	1	0	2	0	0	2	2	1	0	0	1	2	0.823529	0.856484

## Sheet: Fig. 6
Fig. 6	Parameter		Condition	Piglet individual (n)	Value	Passed normality test ?	Mean	SEM	P value
Fig. 6d	Relative transcriptional level	DRD2	Con	4	0.154747	Yes	0.180117	0.0552413	Unpaired t-test, One-tailed, P < 0.05
					0.177446
					0.268846
					0.119431
			VPA	6	0.384063	Yes	1.47998	1.21607
					0.423563
					3.49127
					0.828273
					0.935179
					2.81754
		GNAL	Con	4	1.45499	Yes	1	0.313763	Unpaired t-test, One-tailed, P = 0.0518
					0.707233
					1.12853
					0.709244
			VPA	6	1.34939	Yes	3.25518	2.18132
					1.4004
					4.36955
					3.42842
					1.56362
					7.41972
		ADORA2A	Con	4	0.032319	Yes	0.09126	0.0677411	Unpaired t-test, One-tailed, P = 0.0852
					0.205248
					0.050079
					0.077394
			VPA	6	0.062507	Yes	0.31301	0.257427
					0.061032
					0.571001
					0.06707
					0.448542
					0.66791
		GPR88	Con	4	0.215397	Yes	0.177262	0.0413388	Unpaired t-test, One-tailed, P = 0.0673
					0.123305
					0.150934
					0.219414
			VPA	6	0.1857	Yes	0.977017	0.859035
					0.20419
					2.02401
					0.355207
					0.814121
					2.27887
		DDC	Con	4	1.38509	Yes	2.73103	1.89357	Mann-Whitney test,One-tailed, P = 0.2381
					5.74901
					2.9012
					0.888831
			VPA	6	0.522432	No	2.06491	2.33159
					0.705466
					0.681435
					1.70131
					7.17667
					1.60212
		DRD3	Con	3	0.008902	Yes	0.032777	0.0238249	Unpaired t-test, One-tailed, P < 0.05
					0.024125
					0.065304
			VPA	4	0.116628	Yes	0.260724	0.16422
					0.103424
					0.503471
					0.319373

## Sheet: Fig. S1
Fig. S1	Parameter		Condition	Piglet individual (n)	Value	Passed normality test ?	Mean	SEM	P value
Fig. S1a	Frontfoot stride (cm)	Con	FL	8	22.5	Yes	22.4125	0.702562	Paired t-test, Two-tailed, P = 0.0528
					21.6
					22.3
					23.6
					21.6
					21.7
					23
					23
			FR	8	22.5	Yes	23.0125	0.329536
					22.7
					23.6
					23.4
					23
					23
					23
					22.9
		VPA	FL	12	22	Yes	21.4833	1.10366	Paired t-test, Two-tailed, P = 0.0122
					21
					22.5
					23.1
					20.6
					20.7
					20.1
					19.5
					21
					22
					22.6
					22.7
			FR	12	23.6	Yes	22.6167	1.2137
					24.7
					23.9
					22.4
					23.4
					22.1
					21.2
					21.2
					21
					21.3
					22.8
					23.8
	Hindfoot stride (cm)	Con	RL	8	23.4	Yes	22.6	0.838153	Paired t-test, Two-tailed, P = 0.6667
					23.7
					21.9
					22.8
					23.4
					22.6
					21.8
					21.2
			RR	8	22.3	Yes	22.4375	0.892941
					22
					23
					22.6
					23.1
					24
					21.5
					21
		VPA	RL	12	23.6	Yes	22.6167	1.2137	Paired t-test, Two-tailed, P = 0.0886
					24.7
					23.9
					22.4
					23.4
					22.1
					21.2
					21.2
					21
					21.3
					22.8
					23.8
				12	22.2	Yes	21.8083	0.932254
					21
					22.5
					23.1
					20.7
					20.7
			RR		20.1
					22.4
					21.6
					22
					22.9
					22.5
Fig. S1b	Sniffing latency (s)		Con	7	36	Yes	30.1429	12.8778	Unpaired t-test, Two-tailed, P < 0.05
					14
					32
					50
					43
					16
					20
			VPA	12	77	Yes	109.75	72.0048
					35
					157
					65
					40
					160
					139
					253
					22
					111
					213
					45
	Sniffing number		Con	7	16	Yes	14.4286	3.45821	Unpaired t-test, Two-tailed, P = 0.7243
					17
					13
					15
					11
					20
					9
			VPA	12	21	Yes	15.4167	6.36996
					21
					6
					11
					12
					29
					19
					18
					15
					10
					7
					16
	Sniffing time (%)	Yellow dog	Con	7	8.88889	Yes	21.2671	10.2224	Unpaired t-test, Two-tailed, P = 0.9538
					28.6041
					20.2532
					7.33333
					25.6
					36.9231
					30
			VPA	12	25	Yes	23.0249	20.2685
					23.5849
					0
					16.4706
					7.61905
					32.4405
					13.4783
					7.53425
					6.70732
					80
					27.7778
					35.6863
		Green ball	Con	7	43.3333	Yes	25.3639	13.0977	Unpaired t-test, Two-tailed, P = 0.5766
					28.833
					20.2532
					8
					26.4
					0
					20
			VPA	12	23.4694	Yes	25.1366	15.3196
					33.9623
					5.12821
					36.4706
					3.80952
					40.1786
					25.6522
					16.4384
					14.6341
					20
					61.1111
					20.7843
		Blue dragon	Con	7	32.2222	Yes	39.8928	22.4377	Unpaired t-test, Two-tailed, P = 0.3306
					23.7986
					35.443
					76
					32
					9.23077
					0
			VPA	12	31.6327	Yes	20.5227	15.6629
					12.2642
					11.5385
					10.5882
					25.7143
					10.119
					31.3043
					54.1096
					42.0732
					0
					5.55556
					11.3726
		Red ball	Con	7	15.5556	Yes	16.6074	16.5343	Unpaired t-test, Two-tailed, P = 0.6547
					18.7643
					24.0506
					8.66667
					16
					53.8462
					50
			VPA	12	19.898	Yes	31.3159	22.0237
					30.1887
					83.3333
					36.4706
					62.8571
					17.2619
					29.5652
					21.9178
					36.5854
					0
					5.55556
					32.1569
Fig. S1c	Latency to attack (s)		Con	6	4	No	11.6667	16.2652	Mann-Whitney test, Two-tailed, P = 0.9351
					5
					48
					3
					5
					5
			VPA	6	11	No	7.66667	5.70575
					4
					19
					3
					5
					4
	Attack time (s)		Con	6	8	No	9	12.8582	Mann-Whitney test,Two-tailed, P = 0.1775
					0
					37
					6
					0
					3
			VPA	6	10	No	33.8333	43.299
					20
					33
					12
					128
					0
	Total sniffing time (s)		Con	6	202	Yes	194.167	26.5482	Paired t-test, Two-tailed, P = 0.9474
					138
					209
					196
					198
					222
			VPA	6	158	Yes	250.667	45.4924
					277
					259
					234
					287
					289
	Time (%)	Attack	Con	6	3.9604	No	4.34605	6.15036	Mann-Whitney test, Two-tailed, P = 0.1775
					0
					17.7034
					3.06122
					0
					1.35135
			VPA	6	6.32911	Yes	12.6697	14.758
					7.22022
					12.7413
					5.12821
					44.5993
					0
		Tail sniffing	Con	6	12.8713	Yes	13.1197	2.84989	Unpaired t-test, Two-tailed, P = 0.9357
					14.4927
					9.56938
					9.69388
					17.6768
					14.4144
			VPA	6	20.8861	Yes	13.364	5.95236
					15.1624
					20.0772
					5.98291
					11.8467
					6.22837
		Body sniffing	Con	6	29.2079	Yes	25.679	7.72964	Unpaired t-test, Two-tailed, P = 0.375
					9.42029
					33.4928
					25.5102
					26.2626
					30.1802
			VPA	6	30.3798	Yes	29.7725	6.1181
					39.7112
					35.1351
					23.0769
					22.9965
					27.3356
		Head sniffing	Con	6	53.9604	Yes	56.8552	10.9622	Unpaired t-test, Two-tailed, P = 0.19
					76.087
					39.2345
					61.7347
					56.0606
					54.054
			VPA	6	42.4051	Yes	44.1938	16.887
					37.9061
					32.0463
					65.812
					20.5575
					66.436
