# Supplementary material for: Development and evaluation of an autism pig model
Source: Research Square preprint supplement (doi:10.21203/rs.3.rs-4356526/v1), 2024-05-30
Supplement: Supplementary file 2 [file befd546dbc130c9e5316a783.xlsx]

## Sheet: VPA-vs-WT-all_genes
Suppl. Table S1-1, Summary of RNA-seq result
gene_id	BaseMean	lfcSE	stat	FoldChange	log2FoldChange	p-value	q-value	Expression_WT401	Expression_WT402	Expression_WT408	Expression_VPA391	Expression_VPA392	Expression_VPA393	Dbxref	product	Family	GO_id	GO_term	pathway	pathway_description
A1BG	8.97727	0.72402	-0.432182	0.805017	-0.312909	0.665609	0.938236	0.210225	0.416593	0.307273	0.258418	0.199041	0.300373	GeneID:100516980,Genbank:XM_003128132.6	alpha-1-B glycoprotein		GO:0031012	extracellular matrix
A2M	345.947	0.124299	-1.11838	0.908139	-0.139014	0.263404	0.760271	4.27611	4.30409	3.9015	3.8644	3.8469	3.74776	GeneID:403166,Genbank:XM_021092376.1	alpha-2-macroglobulin		GO:0001869,GO:0002020,GO:0004867,GO:0005102,GO:0005615,GO:0019959,GO:0019966,GO:0043120,GO:0048306,GO:0048863	negative regulation of complement activation, lectin pathway|protease binding|serine-type endopeptidase inhibitor activity|receptor binding|extracellular space|interleukin-8 binding|interleukin-1 binding|tumor necrosis factor binding|calcium-dependent protein binding|stem cell differentiation	ko04610	Complement and coagulation cascades
A2ML1	29.4061	0.418721	1.58157	1.58253	0.662236	0.113748	0.573542	0.288839	0.308204	0.258584	0.621345	0.385521	0.361111	GeneID:100152492,Genbank:XM_021092386.1	alpha-2-macroglobulin like 1		GO:0004867,GO:0005615,GO:0030414,GO:0052548,GO:0070062	serine-type endopeptidase inhibitor activity|extracellular space|peptidase inhibitor activity|regulation of endopeptidase activity|extracellular exosome
A4GALT	135.48	0.206701	-0.530125	0.92686	-0.109577	0.596025	0.930662	2.61146	3.09833	2.3169	2.04281	2.64256	2.8311	GeneID:100524987,Genbank:XM_005663760.3	alpha 1,4-galactosyltransferase (P blood group)				ko00603	Glycosphingolipid biosynthesis - globo series
AAAS	89.5869	0.2366	-0.130436	0.978836	-0.0308611	0.896222	0.981535	2.86966	2.53713	2.3209	2.32229	2.89814	2.4328	GeneID:100154333,Genbank:XM_003355403.4	aladin WD repeat nucleoporin		GO:0005634,GO:0005635,GO:0005643,GO:0005654,GO:0005813,GO:0005829,GO:0006110,GO:0006406,GO:0006409,GO:0006913,GO:0007077,GO:0007612,GO:0009566,GO:0016020,GO:0016032,GO:0016925,GO:0019083,GO:0031965,GO:0043657,GO:0046822,GO:0060964,GO:0075733,GO:1900034	nucleus|nuclear envelope|nuclear pore|nucleoplasm|centrosome|cytosol|regulation of glycolytic process|mRNA export from nucleus|tRNA export from nucleus|nucleocytoplasmic transport|mitotic nuclear envelope disassembly|learning|fertilization|membrane|viral process|protein sumoylation|viral transcription|nuclear membrane|host cell|regulation of nucleocytoplasmic transport|regulation of gene silencin…	ko03013	RNA transport
AACS	327.617	0.144063	1.86473	1.20467	0.268638	0.0622195	0.45424	5.90375	4.25355	5.45529	6.33193	5.92676	6.76274	GeneID:100156545,Genbank:XM_021072487.1	acetoacetyl-CoA synthetase		GO:0001889,GO:0005524,GO:0005829,GO:0006631,GO:0007584,GO:0014074,GO:0030729,GO:0032024,GO:0034201,GO:0042594,GO:0045471,GO:0047760,GO:0050872,GO:0060612,GO:0071333,GO:0071394,GO:0071397	liver development|ATP binding|cytosol|fatty acid metabolic process|response to nutrient|response to purine-containing compound|acetoacetate-CoA ligase activity|positive regulation of insulin secretion|response to oleic acid|response to starvation|response to ethanol|butyrate-CoA ligase activity|white fat cell differentiation|adipose tissue development|cellular response to glucose stimulus|cellula…	ko00650,ko00280	Butanoate metabolism|Valine, leucine and isoleucine degradation
AAED1	126.934	0.20946	-0.656719	0.909058	-0.137556	0.511362	0.907086	2.34591	2.26215	2.61356	2.11205	1.8427	2.67654	GeneID:100524271,Genbank:XM_003130857.4	AhpC/TSA antioxidant enzyme domain containing 1		GO:0016209,GO:0055114	antioxidant activity|oxidation-reduction process
AAGAB	2210.2	0.069967	-0.561156	0.973152	-0.0392623	0.574692	0.924126	13.5407	12.419	12.7341	12.352	12.1172	13.5984	GeneID:100517743,Genbank:XM_005659865.3	alpha- and gamma-adaptin binding protein		GO:0005829,GO:0015031	cytosol|protein transport
AAK1	4310.12	0.0547474	-2.74784	0.900977	-0.150437	0.00599887	0.127949	26.9603	26.6933	27.5667	24.5631	24.288	25.1352	GeneID:110255208,Genbank:XM_021087408.1	AP2 associated kinase 1		GO:0004674,GO:0005112,GO:0005524,GO:0005905,GO:0006468,GO:0006897,GO:0019897,GO:0030136,GO:0031252,GO:0032880,GO:0035612,GO:0043195,GO:0045747,GO:0046777,GO:0050821,GO:2000369	protein serine/threonine kinase activity|Notch binding|ATP binding|clathrin-coated pit|protein phosphorylation|endocytosis|extrinsic component of plasma membrane|clathrin-coated vesicle|cell leading edge|regulation of protein localization|AP-2 adaptor complex binding|terminal bouton|positive regulation of Notch signaling pathway|protein autophosphorylation|protein stabilization|regulation of clat…
AAMDC	267.44	0.148412	0.149078	1.01545	0.0221249	0.881492	0.980832	26.1597	29.004	29.4836	31.1048	30.5893	25.2445	GeneID:100737883,Genbank:XM_005667169.3	adipogenesis associated Mth938 domain containing		GO:0005737,GO:0043066,GO:0045600,GO:0045944	cytoplasm|negative regulation of apoptotic process|positive regulation of fat cell differentiation|positive regulation of transcription from RNA polymerase II promoter
AAMP	1369.4	0.0783752	-1.03188	0.945485	-0.0808741	0.302126	0.792058	41.3823	41.0132	38.678	35.5077	40.3887	39.8474	GeneID:100621415,Genbank:XM_021076200.1	angio associated migratory cell protein		GO:0001525,GO:0005829,GO:0005886,GO:0009986,GO:0010595,GO:0014909,GO:0015630,GO:0030154,GO:0045171	angiogenesis|cytosol|plasma membrane|cell surface|positive regulation of endothelial cell migration|smooth muscle cell migration|microtubule cytoskeleton|cell differentiation|intercellular bridge
AAR2	617.061	0.0987137	-1.80063	0.884083	-0.177746	0.0717617	0.476055	9.25535	10.0135	10.0413	8.4756	8.73586	8.9847	GeneID:100152525,Genbank:XM_013985342.2	AAR2 splicing factor homolog		GO:0000244,GO:0005681	spliceosomal tri-snRNP complex assembly|spliceosomal complex
AARD	2.79107	1.51617	0.34455	1.43634	0.522398	0.730433	0.950784	0.0343781	0	0.211043	0.184884	0	0.171921	GeneID:100522252,Genbank:XM_003125512.3	alanine and arginine rich domain containing protein		GO:0030324	lung development
AARS	5643.91	0.0618878	-1.66257	0.931164	-0.102893	0.0963984	0.538234	100.202	102.384	89.1643	89.249	92.8565	92.516	GeneID:100525399,Genbank:XM_021093791.1	alanyl-tRNA synthetase		GO:0000049,GO:0002161,GO:0004813,GO:0005524,GO:0005737,GO:0005829,GO:0006400,GO:0006418,GO:0006419,GO:0008033,GO:0016020,GO:0016597,GO:0021680,GO:0043524,GO:0046872,GO:0050885,GO:0070062	tRNA binding|aminoacyl-tRNA editing activity|alanine-tRNA ligase activity|ATP binding|cytoplasm|cytosol|tRNA modification|tRNA aminoacylation for protein translation|alanyl-tRNA aminoacylation|tRNA processing|membrane|amino acid binding|cerebellar Purkinje cell layer development|negative regulation of neuron apoptotic process|metal ion binding|neuromuscular process controlling balance|extracellul…	ko00970	Aminoacyl-tRNA biosynthesis
AARS2	302.376	0.13517	-0.26666	0.975325	-0.0360443	0.789731	0.96436	4.11873	4.09326	4.65475	3.9668	4.44549	4.281	GeneID:100155115,Genbank:XM_001929593.5	alanyl-tRNA synthetase 2, mitochondrial		GO:0000049,GO:0004813,GO:0005524,GO:0005739,GO:0006400,GO:0016597,GO:0033108,GO:0046872,GO:0070143	tRNA binding|alanine-tRNA ligase activity|ATP binding|mitochondrion|tRNA modification|amino acid binding|mitochondrial respiratory chain complex assembly|metal ion binding|mitochondrial alanyl-tRNA aminoacylation	ko00970	Aminoacyl-tRNA biosynthesis
AARSD1	703.701	0.0991832	-0.680049	0.954324	-0.0674494	0.496473	0.902157	29.1353	26.8545	24.433	24.5318	26.8915	26.1727	GeneID:110255998,Genbank:XM_021066968.1	alanyl-tRNA synthetase domain containing 1		GO:0003676,GO:0004813,GO:0005524,GO:0005737,GO:0006419,GO:0046872	nucleic acid binding|alanine-tRNA ligase activity|ATP binding|cytoplasm|alanyl-tRNA aminoacylation|metal ion binding
AASDH	314.721	0.141254	-1.73693	0.843612	-0.245348	0.0823998	0.506846	2.31445	1.9822	2.19977	1.97187	1.5743	1.99199	GeneID:100627475,Genbank:XM_021101363.1	aminoadipate-semialdehyde dehydrogenase		GO:0005524,GO:0006631,GO:0016878,GO:0019482,GO:0043041	ATP binding|fatty acid metabolic process|acid-thiol ligase activity|beta-alanine metabolic process|amino acid activation for nonribosomal peptide biosynthetic process
AASDHPPT	1727.4	0.0718379	-0.71404	0.96507	-0.0512951	0.475202	0.891047	28.7537	29.8358	28.4624	28.2164	26.7363	29.9636	GeneID:100525064,Genbank:XM_003129822.5	aminoadipate-semialdehyde dehydrogenase-phosphopantetheinyl transferase		GO:0000287,GO:0005829,GO:0008897,GO:0015939,GO:0019878,GO:0070062	magnesium ion binding|cytosol|holo-[acyl-carrier-protein] synthase activity|pantothenate metabolic process|lysine biosynthetic process via aminoadipic acid|extracellular exosome	ko00770	Pantothenate and CoA biosynthesis
AASS	165.868	0.174289	1.70425	1.22862	0.297033	0.0883341	0.522662	1.32997	1.27543	1.30908	1.65685	1.46909	1.73432	GeneID:100513962,Genbank:XM_021078482.1	aminoadipate-semialdehyde synthase		GO:0004753,GO:0005737,GO:0005739,GO:0006091,GO:0019878,GO:0033512,GO:0047130,GO:0047131	saccharopine dehydrogenase activity|cytoplasm|mitochondrion|generation of precursor metabolites and energy|lysine biosynthetic process via aminoadipic acid|L-lysine catabolic process to acetyl-CoA via saccharopine|saccharopine dehydrogenase (NADP+, L-lysine-forming) activity|saccharopine dehydrogenase (NAD+, L-glutamate-forming) activity	ko00310	Lysine degradation
AATF	291.466	0.136531	-1.43611	0.872924	-0.196073	0.150972	0.638868	8.40064	8.18921	8.62162	7.30661	6.81633	8.11685	GeneID:100513881,Genbank:XM_003131707.4	apoptosis antagonizing transcription factor
AATK	2125.44	0.0778757	0.429885	1.02348	0.0334776	0.667279	0.938359	19.8976	17.3156	20.8015	19.1093	20.67	20.2725	GeneID:100627757,Genbank:XM_021066479.1	apoptosis associated tyrosine kinase		GO:0004674,GO:0005524,GO:0016021,GO:0048471	protein serine/threonine kinase activity|ATP binding|integral component of membrane|perinuclear region of cytoplasm
ABAT	2834.95	0.0666501	1.48155	1.07084	0.0987457	0.138459	0.618591	95.4395	105.603	94.7818	108.83	103.359	108.015	GeneID:397500,Genbank:NM_214263.1	4-aminobutyrate aminotransferase		GO:0005739,GO:0005759,GO:0005829,GO:0009450,GO:0030170,GO:0032144,GO:0032145,GO:0034386,GO:0042135,GO:0042803,GO:0046872,GO:0047298,GO:0048148,GO:0051537	mitochondrion|mitochondrial matrix|cytosol|gamma-aminobutyric acid catabolic process|pyridoxal phosphate binding|4-aminobutyrate transaminase complex|succinate-semialdehyde dehydrogenase binding|4-aminobutyrate:2-oxoglutarate transaminase activity|neurotransmitter catabolic process|protein homodimerization activity|metal ion binding|(S)-3-amino-2-methylpropionate transaminase activity|behavioral …	ko00410,ko04727,ko00650,ko00280,ko00250,ko00640	beta-Alanine metabolism|GABAergic synapse|Butanoate metabolism|Valine, leucine and isoleucine degradation|Alanine, aspartate and glutamate metabolism|Propanoate metabolism
ABCA1	792.267	0.11071	0.390253	1.0304	0.043205	0.69635	0.942939	4.68588	4.7777	3.56433	4.38494	4.7629	4.4195	GeneID:100152112,Genbank:NM_001317080.1	ATP binding cassette subfamily A member 1				ko04975,ko02010	Fat digestion and absorption|ABC transporters
ABCA12	39.5569	0.38962	0.402878	1.11494	0.156969	0.687038	0.942933	0.163999	0.233325	0.310731	0.287459	0.342178	0.170102	GeneID:100512445,Genbank:XM_021074975.1	ATP binding cassette subfamily A member 12				ko02010	ABC transporters
ABCA3	2588.95	0.0667561	-0.785991	0.964284	-0.0524697	0.431873	0.867056	22.6792	21.7393	21.9668	21.74	20.1178	22.8525	GeneID:100518064,Genbank:XM_005655176.3	ATP binding cassette subfamily A member 3				ko02010	ABC transporters
ABCA4	11.8249	0.625624	0.379212	1.17874	0.237244	0.70453	0.944463	0.099904	0.0761443	0.0657106	0.107456	0.102472	0.0785097	GeneID:100155583,Genbank:XM_021090184.1	ATP binding cassette subfamily A member 4				ko02010	ABC transporters
ABCA5	637.196	0.100306	-1.8348	0.880233	-0.184042	0.0665348	0.465192	5.59911	5.4031	5.66425	5.32779	4.81909	4.68643	GeneID:100520049,Genbank:XM_021068102.1	ATP binding cassette subfamily A member 5				ko02010	ABC transporters
ABCA6	16.2683	0.604192	-2.35284	0.373307	-1.42157	0.0186307	0.247746	0.229481	0.156714	0.291143	0.0789849	0.141952	0.0367233	GeneID:100520861,Genbank:XM_021068088.1	ATP binding cassette subfamily A member 6				ko02010	ABC transporters
ABCA7	231.891	0.155651	0.346116	1.03805	0.0538732	0.729255	0.950533	1.93162	1.73072	1.57654	1.92697	1.91379	1.65912	GeneID:100623892,Genbank:XM_013994807.2	ATP binding cassette subfamily A member 7				ko02010	ABC transporters
ABCB1	505.947	0.119015	1.80504	1.16056	0.214827	0.0710687	0.475409	6.04997	6.52028	5.17281	7.31582	6.30783	7.17877	GeneID:396910,Genbank:XM_003130205.5	ATP-binding cassette, sub-family B (MDR/TAP), member 1				ko04976,ko02010	Bile secretion|ABC transporters
ABCB10	342.668	0.135242	0.829846	1.0809	0.11223	0.406626	0.85832	5.30797	5.35602	4.17643	5.49201	5.51268	5.20791	GeneID:100153026,Genbank:XM_021072390.1	ATP binding cassette subfamily B member 10				ko02010	ABC transporters
ABCB4	1.50863	2.00317	-1.44128	0.135172	-2.88713	0.149505	0.636724	0.008572	0.0365868	0.0263112	0.00921997	0	0	GeneID:100144586,Genbank:XM_013989596.2	ATP binding cassette subfamily B member 4				ko04976,ko02010	Bile secretion|ABC transporters
ABCB5	2.14071	1.48503	0.443183	1.57805	0.65814	0.657633	0.937251	0.0110384	0.0353354	0.0112939	0.0237456	0.0121931	0.0552017	GeneID:100738171,Genbank:XM_021063420.1	ATP binding cassette subfamily B member 5				ko02010	ABC transporters
ABCB6	328.228	0.140269	-0.243292	0.976623	-0.0341265	0.807779	0.9686	5.72787	7.52073	6.89348	6.78737	6.15544	6.9329	GeneID:100155585,Genbank:XM_005672225.3	ATP binding cassette subfamily B member 6 (Langereis blood group)		GO:0005524,GO:0005654,GO:0005739,GO:0005740,GO:0005741,GO:0005768,GO:0005783,GO:0005794,GO:0005829,GO:0005886,GO:0006779,GO:0007420,GO:0015439,GO:0015562,GO:0015886,GO:0020037,GO:0031307,GO:0043588,GO:0070062	ATP binding|nucleoplasm|mitochondrion|mitochondrial envelope|mitochondrial outer membrane|endosome|endoplasmic reticulum|Golgi apparatus|cytosol|plasma membrane|porphyrin-containing compound biosynthetic process|brain development|heme-transporting ATPase activity|efflux transmembrane transporter activity|heme transport|heme binding|integral component of mitochondrial outer membrane|skin developme…	ko02010	ABC transporters
ABCB7	385.091	0.122746	0.095837	1.00819	0.0117636	0.92365	0.984952	6.54817	5.74244	6.33372	6.6751	6.37408	5.9426	GeneID:100157043,Genbank:XM_001928719.5	ATP binding cassette subfamily B member 7				ko02010	ABC transporters
ABCB8	449.091	0.118451	1.26554	1.1095	0.149905	0.205677	0.707543	6.28893	5.85599	5.31954	5.9029	6.85976	6.82842	GeneID:100626423,Genbank:XM_013990736.2	ATP binding cassette subfamily B member 8		GO:0005524,GO:0005743,GO:0016021,GO:0042626	ATP binding|mitochondrial inner membrane|integral component of membrane|ATPase activity, coupled to transmembrane movement of substances	ko02010	ABC transporters
ABCB9	691.918	0.111233	0.411574	1.03224	0.0457807	0.680652	0.941091	10.4296	11.3705	10.3158	10.1952	10.2201	13.0884	GeneID:100155346,Genbank:XM_021074072.1	ATP binding cassette subfamily B member 9				ko04142,ko02010	Lysosome|ABC transporters
ABCC1	208.227	0.165574	-0.547254	0.939125	-0.0906113	0.584204	0.92735	1.92828	2.38089	1.85078	2.08391	1.8967	1.86432	GeneID:733619,Genbank:XM_021086560.1	ATP binding cassette subfamily C member 1		GO:0005524,GO:0005887,GO:0006855,GO:0008559,GO:0015431,GO:0016323,GO:0034634,GO:0034775,GO:0042908	ATP binding|integral component of plasma membrane|drug transmembrane transport|xenobiotic transmembrane transporting ATPase activity|glutathione S-conjugate-exporting ATPase activity|basolateral plasma membrane|glutathione transmembrane transporter activity|glutathione transmembrane transport|xenobiotic transport	ko04977,ko04071,ko02010	Vitamin digestion and absorption|Sphingolipid signaling pathway|ABC transporters
ABCC10	169.999	0.178723	2.14286	1.30403	0.382978	0.0321247	0.325417	1.83076	1.67615	1.69969	2.62553	2.15957	2.07974	GeneID:100152696,Genbank:XM_021098753.1	ATP binding cassette subfamily C member 10				ko02010	ABC transporters
ABCC12	18.3054	0.565247	1.11733	1.54925	0.63157	0.263851	0.760271	0.166685	0.061567	0.0590342	0.199972	0.141631	0.109005	GeneID:100627900,Genbank:XM_021094234.1	ATP binding cassette subfamily C member 12				ko02010	ABC transporters
ABCC2	2.85105	1.41065	-1.1708	0.318289	-1.65159	0.24168	0.743291	0.0109159	0.0232956	0.0390901	0.00587055	0.0180867	0	GeneID:397535,Genbank:XM_021073710.1	ATP binding cassette subfamily C member 2				ko04976,ko02010	Bile secretion|ABC transporters
ABCC3	70.758	0.268288	2.55563	1.60842	0.685645	0.0105997	0.182508	0.541036	0.413595	0.413104	0.82513	0.713588	0.686509	GeneID:100513231,Genbank:XM_003131575.6	ATP binding cassette subfamily C member 3				ko04976,ko02010	Bile secretion|ABC transporters
ABCC4	233.923	0.155308	1.01383	1.11532	0.157456	0.310663	0.799195	1.80457	2.16038	2.11653	2.04513	2.37255	2.43879	GeneID:100152536,Genbank:XM_021065787.1	ATP binding cassette subfamily C member 4				ko04976,ko04024,ko02010	Bile secretion|cAMP signaling pathway|ABC transporters
ABCC5	2180.41	0.070114	0.883061	1.04385	0.0619149	0.377203	0.841635	6.63488	6.55383	7.33367	7.0039	7.3187	7.34154	GeneID:100513626,Genbank:XM_021069932.1	ATP binding cassette subfamily C member 5				ko02010	ABC transporters
ABCC6	1.84872	1.5913	0.910883	2.73112	1.44949	0.362357	0.834514	0.0107878	0.011511	0.0110375	0.0348097	0.0357486	0.0215793	GeneID:396909,Genbank:XM_021086559.1	ATP binding cassette subfamily C member 6				ko02010	ABC transporters
ABCC8	770.48	0.107921	0.864286	1.06679	0.0932745	0.387431	0.847892	7.65328	10.1958	8.82682	9.59967	9.77001	9.39639	GeneID:100158245,Genbank:XM_005661102.3	ATP binding cassette subfamily C member 8		GO:0001678,GO:0005267,GO:0005524,GO:0005886,GO:0007565,GO:0007613,GO:0008076,GO:0008281,GO:0008282,GO:0008542,GO:0009268,GO:0010043,GO:0010989,GO:0016525,GO:0019905,GO:0030672,GO:0032496,GO:0032760,GO:0032868,GO:0042383,GO:0042493,GO:0042626,GO:0043268,GO:0044325,GO:0046676,GO:0050768,GO:0060253,GO:0061045,GO:0061855,GO:0071310,GO:1900721,GO:1903818,GO:1905075,GO:1905604	cellular glucose homeostasis|potassium channel activity|ATP binding|plasma membrane|female pregnancy|memory|voltage-gated potassium channel complex|sulfonylurea receptor activity|inward rectifying potassium channel|visual learning|response to pH|response to zinc ion|negative regulation of low-density lipoprotein particle clearance|negative regulation of angiogenesis|syntaxin binding|synaptic vesi…	ko04911,ko02010	Insulin secretion|ABC transporters
ABCC9	169.698	0.240568	1.57217	1.29973	0.378215	0.11591	0.577867	1.29412	1.23136	1.27347	0.94865	2.29446	1.75602	GeneID:100127449,Genbank:XM_021092240.1	ATP binding cassette subfamily C member 9				ko02010	ABC transporters
ABCD1	126.828	0.204787	0.191024	1.02749	0.0391191	0.848507	0.977948	1.98701	2.25379	1.87293	1.8343	2.43681	2.08125	GeneID:100519529,Genbank:XM_003135473.5	ATP binding cassette subfamily D member 1				ko04146,ko02010	Peroxisome|ABC transporters
ABCD2	504.671	0.125366	-0.545292	0.953721	-0.0683612	0.585553	0.92735	6.87183	7.91566	7.25454	8.25826	6.23248	6.75005	GeneID:100520309,Genbank:XM_021092531.1	ATP binding cassette subfamily D member 2				ko04146,ko02010	Peroxisome|ABC transporters
ABCD3	1663.57	0.0749297	1.0891	1.0582	0.0816062	0.276108	0.772593	27.2	24.4313	27.3813	28.4481	27.0372	29.0518	GeneID:100626343,Genbank:XM_021088666.1	ATP binding cassette subfamily D member 3				ko04146,ko02010	Peroxisome|ABC transporters
ABCD4	224.868	0.167971	2.01156	1.2639	0.337885	0.0442661	0.386549	4.88597	5.50866	3.91436	6.59393	5.42251	6.24683	GeneID:100152503,Genbank:XM_001929196.5	ATP binding cassette subfamily D member 4				ko04146,ko02010	Peroxisome|ABC transporters
ABCE1	1174.97	0.0782346	-0.947512	0.949916	-0.0741283	0.343378	0.822666	13.0799	12.8234	13.2867	12.9037	12.6881	12.051	GeneID:100524881,Genbank:XM_003129170.6	ATP binding cassette subfamily E member 1
ABCF1	1396.33	0.0751411	-0.498327	0.974379	-0.0374448	0.618253	0.931423	26.2443	25.3606	24.9376	23.9986	24.6459	26.7513	GeneID:100144452,Genbank:XM_005653453.3	ATP binding cassette subfamily F member 1		GO:0005524,GO:0005635,GO:0005654,GO:0005737,GO:0006413,GO:0008494,GO:0016887,GO:0042788,GO:0043022,GO:0045727	ATP binding|nuclear envelope|nucleoplasm|cytoplasm|translational initiation|translation activator activity|ATPase activity|polysomal ribosome|ribosome binding|positive regulation of translation
ABCF2	1242.04	0.0817554	-1.79508	0.903279	-0.146757	0.0726417	0.480276	15.2293	17.4002	16.1698	14.4746	15.4469	14.6452	GeneID:100522910,Genbank:XM_021079257.1	ATP binding cassette subfamily F member 2		GO:0005524,GO:0005739,GO:0016887	ATP binding|mitochondrion|ATPase activity
ABCF3	1477.6	0.0814036	-0.506439	0.971829	-0.041226	0.612549	0.931086	16.5349	18.1102	15.3023	16.0523	15.7429	17.2634	GeneID:100626614,Genbank:XM_003358707.4	ATP binding cassette subfamily F member 3		GO:0005524,GO:0016020,GO:0016887,GO:0045296,GO:0051607	ATP binding|membrane|ATPase activity|cadherin binding|defense response to virus
ABCG1	888.662	0.0928798	-0.929716	0.941902	-0.0863519	0.352518	0.829466	8.84573	8.21644	7.56116	7.42067	8.37244	7.65845	GeneID:100620416,Genbank:XM_021071021.1	ATP binding cassette subfamily G member 1				ko02010	ABC transporters
ABCG2	371.625	0.127722	0.364046	1.03275	0.0464966	0.715824	0.947817	10.8215	9.23202	10.1516	9.9036	11.6028	10.056	GeneID:397073,Genbank:NM_214010.1	ATP-binding cassette, sub-family G (WHITE), member 2		GO:0005524,GO:0006855,GO:0016021,GO:0016324,GO:0031966,GO:0033344,GO:0042626,GO:0043235	ATP binding|drug transmembrane transport|integral component of membrane|apical plasma membrane|mitochondrial membrane|cholesterol efflux|ATPase activity, coupled to transmembrane movement of substances|receptor complex	ko04976,ko02010	Bile secretion|ABC transporters
ABCG4	980.421	0.0893665	-0.883682	0.946732	-0.0789715	0.376868	0.841491	13.278	11.5246	11.1206	11.3222	11.5393	11.5218	GeneID:100518504,Genbank:XM_013979467.2	ATP binding cassette subfamily G member 4				ko02010	ABC transporters
ABHD1	74.7595	0.258728	0.499064	1.09363	0.129122	0.617734	0.931423	2.67465	2.4683	2.92147	3.11009	2.47533	3.32583	GeneID:100525041,Genbank:XM_005662672.3	abhydrolase domain containing 1		GO:0016021,GO:0016298,GO:0044255,GO:0052689	integral component of membrane|lipase activity|cellular lipid metabolic process|carboxylic ester hydrolase activity
ABHD10	280.613	0.141007	-0.457949	0.956228	-0.064574	0.646989	0.937227	3.48493	3.97681	3.37988	3.436	3.72917	3.3161	GeneID:100623142,Genbank:XM_021070392.1	abhydrolase domain containing 10		GO:0004553,GO:0005739,GO:0005829,GO:0019391,GO:0102390	hydrolase activity, hydrolyzing O-glycosyl compounds|mitochondrion|cytosol|glucuronoside catabolic process|mycophenolic acid acyl-glucuronide esterase activity
ABHD11	1081.45	0.0781692	-0.0766091	0.995858	-0.00598847	0.938935	0.987529	49.075	48.1482	49.7666	48.3003	49.3153	50.3867	GeneID:100525863,Genbank:XM_021086333.1	abhydrolase domain containing 11		GO:0005739,GO:0016787	mitochondrion|hydrolase activity
ABHD12	3908.86	0.0613001	-0.530139	0.977726	-0.0324976	0.596015	0.930662	118.639	120.415	116.552	108.833	121.918	120.82	GeneID:100621636,Genbank:XM_021078253.1	abhydrolase domain containing 12		GO:0002084,GO:0004622,GO:0006660,GO:0007628,GO:0008474,GO:0010996,GO:0016021,GO:0032281,GO:0032839,GO:0046464,GO:0047372,GO:0052651	protein depalmitoylation|lysophospholipase activity|phosphatidylserine catabolic process|adult walking behavior|palmitoyl-(protein) hydrolase activity|response to auditory stimulus|integral component of membrane|AMPA glutamate receptor complex|dendrite cytoplasm|acylglycerol catabolic process|acylglycerol lipase activity|monoacylglycerol catabolic process
ABHD12B	24.935	0.509162	-2.05759	0.483757	-1.04764	0.0396299	0.363589	0.300866	0.906459	0.651876	0.285537	0.195493	0.424826	GeneID:100523298,Genbank:XM_003121809.5	abhydrolase domain containing 12B		GO:0016787	hydrolase activity
ABHD13	433.864	0.114717	-0.493349	0.961531	-0.0565954	0.621766	0.932123	4.24566	4.64647	4.77934	4.28983	4.54765	4.45426	GeneID:100154680,Genbank:XM_013980681.2	abhydrolase domain containing 13		GO:0002084,GO:0008474,GO:0016020,GO:0016021,GO:0032839	protein depalmitoylation|palmitoyl-(protein) hydrolase activity|membrane|integral component of membrane|dendrite cytoplasm
ABHD14A	791.26	0.0945431	1.60666	1.11103	0.151898	0.10813	0.564567	9.85661	9.23392	8.2566	10.3756	10.2813	10.0569	GeneID:100625665,Genbank:XM_021068482.1	abhydrolase domain containing 14A		GO:0005737,GO:0016021,GO:0016787,GO:0070062	cytoplasm|integral component of membrane|hydrolase activity|extracellular exosome
ABHD14B	284.084	0.168069	2.6804	1.36651	0.450493	0.00735337	0.145791	6.05257	7.49065	5.07596	7.28384	8.24751	10.1721	GeneID:100621118,Genbank:XM_005669623.3	abhydrolase domain containing 14B		GO:0005730,GO:0005737,GO:0005829,GO:0016787,GO:0045944	nucleolus|cytoplasm|cytosol|hydrolase activity|positive regulation of transcription from RNA polymerase II promoter
ABHD15	26.455	0.449429	0.239308	1.0774	0.107552	0.810867	0.968892	0.241956	0.28584	0.159144	0.269541	0.314992	0.164213	GeneID:100516224,Genbank:XM_013989996.2	abhydrolase domain containing 15		GO:0005576,GO:0016020,GO:0016788,GO:0044255	extracellular region|membrane|hydrolase activity, acting on ester bonds|cellular lipid metabolic process
ABHD16A	1369.95	0.0746108	0.141267	1.00733	0.0105401	0.887659	0.980832	22.1528	22.2765	21.1083	21.3636	23.2304	22.1566	GeneID:100155979,Genbank:XM_021098060.1	abhydrolase domain containing 16A		GO:0016021,GO:0047372,GO:0052651,GO:1905344	integral component of membrane|acylglycerol lipase activity|monoacylglycerol catabolic process|prostaglandin catabolic process
ABHD17A	1432.84	0.0810937	0.946329	1.05463	0.0767413	0.343981	0.822814	50.5784	56.4698	49.9787	55.216	59.1344	53.0752	GeneID:100524666,Genbank:XM_003122999.6	abhydrolase domain containing 17A		GO:0005576,GO:0016787	extracellular region|hydrolase activity
ABHD17B	945.098	0.0884908	-0.467539	0.97173	-0.0413729	0.640115	0.935432	19.4506	17.8478	19.7254	19.6505	18.6443	17.7391	GeneID:100155547,Genbank:XM_005660158.3	abhydrolase domain containing 17B		GO:0002084,GO:0005576,GO:0005886,GO:0008474,GO:0014069,GO:0016020,GO:0018345,GO:0055038,GO:1902473,GO:1902817,GO:1902950,GO:1905668	protein depalmitoylation|extracellular region|plasma membrane|palmitoyl-(protein) hydrolase activity|postsynaptic density|membrane|protein palmitoylation|recycling endosome membrane|regulation of protein localization to synapse|negative regulation of protein localization to microtubule|regulation of dendritic spine maintenance|positive regulation of protein localization to endosome
ABHD17C	570.158	0.099997	-0.136959	0.990552	-0.0136955	0.891063	0.981086	13.8172	13.3743	13.8088	13.161	13.6679	14.2321	GeneID:100522555,Genbank:XM_003128448.4	abhydrolase domain containing 17C		GO:0002084,GO:0008474,GO:0014069,GO:0018345,GO:1902817,GO:1905668	protein depalmitoylation|palmitoyl-(protein) hydrolase activity|postsynaptic density|protein palmitoylation|negative regulation of protein localization to microtubule|positive regulation of protein localization to endosome
ABHD18	105.835	0.212844	-0.510618	0.927435	-0.108682	0.609619	0.931086	1.47733	1.57638	1.43127	1.46245	1.3286	1.41221	GeneID:100516683,Genbank:XM_013978904.2	abhydrolase domain containing 18		GO:0005576	extracellular region
ABHD2	2908.19	0.0703418	-0.223939	0.989141	-0.0157523	0.822805	0.972	20.5335	21.1533	23.7283	21.184	21.7238	22.5291	GeneID:100153434,Genbank:XM_001925989.7	abhydrolase domain containing 2		GO:0003707,GO:0005886,GO:0016021,GO:0032570,GO:0042562,GO:0043401,GO:0046464,GO:0047372	steroid hormone receptor activity|plasma membrane|integral component of membrane|response to progesterone|hormone binding|steroid hormone mediated signaling pathway|acylglycerol catabolic process|acylglycerol lipase activity
ABHD3	999.13	0.0958377	0.981306	1.06736	0.0940461	0.326442	0.809404	25.1208	24.5024	21.1906	24.2194	28.0853	24.1164	GeneID:100524684,Genbank:XM_005653405.3	abhydrolase domain containing 3		GO:0004623,GO:0008970,GO:0016021,GO:0046470,GO:0052739,GO:0052740,GO:0102567,GO:0102568	phospholipase A2 activity|phosphatidylcholine 1-acylhydrolase activity|integral component of membrane|phosphatidylcholine metabolic process|phosphatidylserine 1-acylhydrolase activity|1-acyl-2-lysophosphatidylserine acylhydrolase activity|phospholipase A2 activity (consuming 1,2-dipalmitoylphosphatidylcholine)|phospholipase A2 activity consuming 1,2-dioleoylphosphatidylethanolamine)
ABHD4	1158.56	0.0992204	1.94683	1.14327	0.193165	0.0515556	0.414219	18.729	21.0049	17.9048	23.1196	24.1958	19.2958	GeneID:100154266,Genbank:XM_005666276.3	abhydrolase domain containing 4		GO:0016042,GO:0016787	lipid catabolic process|hydrolase activity
ABHD5	170.97	0.178014	0.284166	1.03569	0.0505855	0.776284	0.962439	7.2107	6.53107	8.23546	7.48521	8.38173	7.17002	GeneID:497624,Genbank:NM_001012407.1	abhydrolase domain containing 5		GO:0003841,GO:0005811,GO:0005829,GO:0006631,GO:0006654,GO:0010891,GO:0010898,GO:0030154	1-acylglycerol-3-phosphate O-acyltransferase activity|lipid droplet|cytosol|fatty acid metabolic process|phosphatidic acid biosynthetic process|negative regulation of sequestering of triglyceride|positive regulation of triglyceride catabolic process|cell differentiation	ko04923	Regulation of lipolysis in adipocytes
ABHD6	951.536	0.113289	-0.505046	0.961117	-0.0572161	0.613526	0.931086	19.4621	22.881	16.5541	19.1575	17.0567	20.9808	GeneID:100515411,Genbank:XM_021069089.1	abhydrolase domain containing 6		GO:0004620,GO:0005739,GO:0005886,GO:0009395,GO:0016021,GO:0030336,GO:0032281,GO:0046464,GO:0046889,GO:0047372,GO:0060292,GO:0070062,GO:2000124	phospholipase activity|mitochondrion|plasma membrane|phospholipid catabolic process|integral component of membrane|negative regulation of cell migration|AMPA glutamate receptor complex|acylglycerol catabolic process|positive regulation of lipid biosynthetic process|acylglycerol lipase activity|long term synaptic depression|extracellular exosome|regulation of endocannabinoid signaling pathway	ko04723	Retrograde endocannabinoid signaling
ABHD8	1576.25	0.0735618	-1.1479	0.94315	-0.0844416	0.25101	0.751405	44.4174	48.2613	44.3938	44.7491	42.3107	43.6135	GeneID:110259326,Genbank:XM_021083570.1	abhydrolase domain containing 8		GO:0016787	hydrolase activity
ABI1	2077.43	0.0651047	-1.16149	0.948935	-0.0756182	0.245444	0.747122	34.7314	35.0522	36.3838	33.1032	34.3307	34.4345	GeneID:100738420,Genbank:XM_021064900.1	abl interactor 1		GO:0001756,GO:0005622,GO:0005634,GO:0005856,GO:0008134,GO:0008154,GO:0014069,GO:0017124,GO:0018108,GO:0030027,GO:0030054,GO:0030175,GO:0030296,GO:0030426,GO:0031209,GO:0031252,GO:0032403,GO:0035855,GO:0043005,GO:0045211,GO:0045296,GO:0048813,GO:0070062,GO:0072673	somitogenesis|intracellular|nucleus|cytoskeleton|transcription factor binding|actin polymerization or depolymerization|postsynaptic density|SH3 domain binding|peptidyl-tyrosine phosphorylation|lamellipodium|cell junction|filopodium|protein tyrosine kinase activator activity|growth cone|SCAR complex|cell leading edge|protein complex binding|megakaryocyte development|neuron projection|postsynaptic …
ABI2	5119.37	0.0557312	-0.894463	0.966037	-0.0498495	0.371074	0.839055	29.9669	29.5636	30.5981	29.0554	28.3272	30.6482	GeneID:100514879,Genbank:XM_021075327.1	abl interactor 2		GO:0003677,GO:0005737,GO:0005829,GO:0005856,GO:0006928,GO:0007010,GO:0008093,GO:0008154,GO:0016032,GO:0016477,GO:0016601,GO:0017124,GO:0018108,GO:0019900,GO:0030027,GO:0030175,GO:0031209,GO:0031625,GO:0032403,GO:0070064,GO:2000601	DNA binding|cytoplasm|cytosol|cytoskeleton|movement of cell or subcellular component|cytoskeleton organization|cytoskeletal adaptor activity|actin polymerization or depolymerization|viral process|cell migration|Rac protein signal transduction|SH3 domain binding|peptidyl-tyrosine phosphorylation|kinase binding|lamellipodium|filopodium|SCAR complex|ubiquitin protein ligase binding|protein complex b…	ko04810	Regulation of actin cytoskeleton
ABI3BP	641.841	0.110961	2.17594	1.18218	0.241445	0.0295595	0.313749	4.80886	5.18463	5.32095	6.47219	5.23823	6.5852	GeneID:100154641,Genbank:XM_021070523.1	ABI family member 3 binding protein		GO:0005518,GO:0005576,GO:0005614,GO:0005615,GO:0008201,GO:0010811,GO:0030198,GO:0031012	collagen binding|extracellular region|interstitial matrix|extracellular space|heparin binding|positive regulation of cell-substrate adhesion|extracellular matrix organization|extracellular matrix
ABL1	1334.96	0.0791791	1.52901	1.08754	0.121066	0.126261	0.594378	11.2474	10.8962	12.3291	12.2461	12.996	12.6738	GeneID:100524544,Genbank:XM_005660524.3	ABL proto-oncogene 1, non-receptor tyrosine kinase				ko04722,ko04360,ko04110,ko04012,ko04014	Neurotrophin signaling pathway|Axon guidance|Cell cycle|ErbB signaling pathway|Ras signaling pathway
ABL2	961.11	0.0905359	-0.0306524	0.998078	-0.00277514	0.975547	0.996008	3.85021	3.93141	4.36968	3.8759	3.99831	4.38887	GeneID:100627019,Genbank:XM_003482730.4	ABL proto-oncogene 2, non-receptor tyrosine kinase				ko04014,ko04012	Ras signaling pathway|ErbB signaling pathway
ABLIM1	4745.26	0.0635207	2.88021	1.13521	0.182953	0.00397409	0.0987212	14.7868	15.6794	13.871	17.4401	17.1908	16.2428	GeneID:100154343,Genbank:XM_013983755.2	actin binding LIM protein 1		GO:0001725,GO:0003779,GO:0005737,GO:0007010,GO:0007411,GO:0014069,GO:0015629,GO:0030027,GO:0030032,GO:0045944,GO:0046872,GO:0060271	stress fiber|actin binding|cytoplasm|cytoskeleton organization|axon guidance|postsynaptic density|actin cytoskeleton|lamellipodium|lamellipodium assembly|positive regulation of transcription from RNA polymerase II promoter|metal ion binding|cilium assembly	ko04360	Axon guidance
ABLIM2	1380.58	0.0740428	1.09793	1.05797	0.0812937	0.272235	0.769267	20.8606	20.4443	19.6181	20.6862	22.1755	22.3036	GeneID:100522624,Genbank:XM_021100956.1	actin binding LIM protein family member 2		GO:0003779,GO:0005737,GO:0006351,GO:0015629,GO:0030036,GO:0046872	actin binding|cytoplasm|transcription, DNA-templated|actin cytoskeleton|actin cytoskeleton organization|metal ion binding	ko04360	Axon guidance
ABLIM3	1137.88	0.0764204	1.07579	1.05864	0.0822125	0.28202	0.775912	10.8239	10.8402	10.6625	11.4507	11.6872	11.4626	GeneID:100515194,Genbank:XM_021084998.1	actin binding LIM protein family member 3		GO:0001725,GO:0003779,GO:0005737,GO:0006351,GO:0030027,GO:0030032,GO:0030036,GO:0045944,GO:0046872,GO:0060271,GO:1903955	stress fiber|actin binding|cytoplasm|transcription, DNA-templated|lamellipodium|lamellipodium assembly|actin cytoskeleton organization|positive regulation of transcription from RNA polymerase II promoter|metal ion binding|cilium assembly|positive regulation of protein targeting to mitochondrion	ko04360	Axon guidance
ABR	14035.9	0.0541056	-1.3399	0.950991	-0.0724963	0.180277	0.6811	98.4181	105.533	106.976	101.511	97.5145	99.9441	GeneID:100522463,Genbank:XM_021066125.1	active BCR-related		GO:0002692,GO:0005089,GO:0005096,GO:0005829,GO:0005886,GO:0007420,GO:0016020,GO:0030036,GO:0032496,GO:0035023,GO:0035556,GO:0042472,GO:0043114,GO:0043314,GO:0043547,GO:0050728,GO:0050766,GO:0050885,GO:0060313	negative regulation of cellular extravasation|Rho guanyl-nucleotide exchange factor activity|GTPase activator activity|cytosol|plasma membrane|brain development|membrane|actin cytoskeleton organization|response to lipopolysaccharide|regulation of Rho protein signal transduction|intracellular signal transduction|inner ear morphogenesis|regulation of vascular permeability|negative regulation of neu…
ABRACL	125.864	0.195442	0.882192	1.12695	0.172418	0.377673	0.841635	8.7271	8.99919	9.37931	9.86008	10.6121	10.4157	GeneID:100525723,Genbank:XM_003353196.4	ABRA C-terminal like
ABRAXAS1	168.861	0.170083	0.780106	1.09633	0.132683	0.435329	0.870216	2.04949	1.96821	2.04759	2.13958	2.33046	2.25483	GeneID:100524450,Genbank:XM_003129348.4	abraxas 1, BRCA1 A complex subunit		GO:0005634,GO:0006302,GO:0010212,GO:0016569,GO:0016604,GO:0031593,GO:0045739,GO:0070531,GO:0072425	nucleus|double-strand break repair|response to ionizing radiation|covalent chromatin modification|nuclear body|polyubiquitin modification-dependent protein binding|positive regulation of DNA repair|BRCA1-A complex|signal transduction involved in G2 DNA damage checkpoint
ABRAXAS2	398.434	0.116748	-1.25637	0.903327	-0.146679	0.208981	0.711439	4.97447	5.19505	5.20994	4.50302	4.61149	4.92829	GeneID:100158023,Genbank:XM_021073619.1	abraxas 2, BRISC complex subunit		GO:0000278,GO:0000922,GO:0002931,GO:0005737,GO:0005829,GO:0005874,GO:0007059,GO:0008017,GO:0008608,GO:0016579,GO:0031593,GO:0051301,GO:0070536,GO:0070552,GO:0090307	mitotic cell cycle|spindle pole|response to ischemia|cytoplasm|cytosol|microtubule|chromosome segregation|microtubule binding|attachment of spindle microtubules to kinetochore|protein deubiquitination|polyubiquitin modification-dependent protein binding|cell division|protein K63-linked deubiquitination|BRISC complex|mitotic spindle assembly
ABT1	836.291	0.0877517	-1.82666	0.894844	-0.160292	0.0677512	0.468566	21.6274	22.5955	21.3012	20.4503	19.0855	19.7295	GeneID:100153723,Genbank:XM_001926306.7	activator of basal transcription 1		GO:0003677,GO:0003723,GO:0005730,GO:0006351,GO:0006355	DNA binding|RNA binding|nucleolus|transcription, DNA-templated|regulation of transcription, DNA-templated
ABTB1	383.402	0.134615	-0.398589	0.963492	-0.053656	0.690196	0.942933	2.41351	2.80626	2.77805	2.22208	2.94851	2.62384	GeneID:100623950,Genbank:XM_021069446.1	ankyrin repeat and BTB domain containing 1		GO:0003746,GO:0005730,GO:0005737,GO:0005829,GO:0005886,GO:0019005,GO:0030162,GO:0031625,GO:0042787,GO:0043161	translation elongation factor activity|nucleolus|cytoplasm|cytosol|plasma membrane|SCF ubiquitin ligase complex|regulation of proteolysis|ubiquitin protein ligase binding|protein ubiquitination involved in ubiquitin-dependent protein catabolic process|proteasome-mediated ubiquitin-dependent protein catabolic process
ABTB2	217.974	0.182749	1.17747	1.16085	0.215182	0.239007	0.741405	2.11823	2.37983	2.55713	2.56766	3.49113	2.23069	GeneID:100512455,Genbank:XM_003122881.5	ankyrin repeat and BTB domain containing 2		GO:0005634,GO:0005654,GO:0005737,GO:0019005,GO:0030162,GO:0031625,GO:0042787,GO:0043161,GO:0046982,GO:0097237	nucleus|nucleoplasm|cytoplasm|SCF ubiquitin ligase complex|regulation of proteolysis|ubiquitin protein ligase binding|protein ubiquitination involved in ubiquitin-dependent protein catabolic process|proteasome-mediated ubiquitin-dependent protein catabolic process|protein heterodimerization activity|cellular response to toxic substance
ACAA1	807.525	0.100337	-0.32903	0.977376	-0.0330138	0.742133	0.955023	10.8432	12.6835	10.1753	10.7821	10.8541	11.6508	GeneID:100515577,Genbank:XM_003132103.4	acetyl-CoA acyltransferase 1		GO:0000038,GO:0003988,GO:0005576,GO:0005777,GO:0005782,GO:0006635,GO:0008206,GO:0008775,GO:0016020,GO:0016401,GO:0033540,GO:0035580,GO:0036109,GO:0043231,GO:0043312	very long-chain fatty acid metabolic process|acetyl-CoA C-acyltransferase activity|extracellular region|peroxisome|peroxisomal matrix|fatty acid beta-oxidation|bile acid metabolic process|acetate CoA-transferase activity|membrane|palmitoyl-CoA oxidase activity|fatty acid beta-oxidation using acyl-CoA oxidase|specific granule lumen|alpha-linolenic acid metabolic process|intracellular membrane-boun…	ko00592,ko00071,ko04146,ko01040,ko00280,ko03320,ko01212	alpha-Linolenic acid metabolism|Fatty acid degradation|Peroxisome|Biosynthesis of unsaturated fatty acids|Valine, leucine and isoleucine degradation|PPAR signaling pathway|Fatty acid metabolism
ACAA2	197.099	0.163674	-0.450666	0.950157	-0.0737623	0.65223	0.937251	9.82359	9.24025	10.3368	8.71334	8.99979	10.5238	GeneID:100312959,Genbank:NM_001167638.1	acetyl-CoA acyltransferase 2		GO:0003723,GO:0003988,GO:0005739,GO:0005743,GO:0005759,GO:0006635,GO:0006695,GO:0070062,GO:0071456,GO:1901029,GO:1902109	RNA binding|acetyl-CoA C-acyltransferase activity|mitochondrion|mitochondrial inner membrane|mitochondrial matrix|fatty acid beta-oxidation|cholesterol biosynthetic process|extracellular exosome|cellular response to hypoxia|negative regulation of mitochondrial outer membrane permeabilization involved in apoptotic signaling pathway|negative regulation of mitochondrial membrane permeability involve…	ko01212,ko00062,ko00280,ko00071	Fatty acid metabolism|Fatty acid elongation|Valine, leucine and isoleucine degradation|Fatty acid degradation
ACACA	3531.51	0.0636604	-0.144792	0.993631	-0.00921751	0.884875	0.980832	17.8226	16.5369	16.6825	17.8253	16.1306	17.309	GeneID:397324,Genbank:XM_021066228.1	acetyl-CoA carboxylase alpha		GO:0003989,GO:0004075,GO:0005524,GO:0005829,GO:0006084,GO:0006633,GO:0046872,GO:0051289,GO:2001295	acetyl-CoA carboxylase activity|biotin carboxylase activity|ATP binding|cytosol|acetyl-CoA metabolic process|fatty acid biosynthetic process|metal ion binding|protein homotetramerization|malonyl-CoA biosynthetic process	ko00061,ko00620,ko04922,ko04152,ko04910,ko00640,ko01212,ko00254	Fatty acid biosynthesis|Pyruvate metabolism|Glucagon signaling pathway|AMPK signaling pathway|Insulin signaling pathway|Propanoate metabolism|Fatty acid metabolism|Aflatoxin biosynthesis
ACACB	55.6851	0.304714	-0.435061	0.912206	-0.132569	0.663518	0.937466	0.356724	0.493422	0.351463	0.326846	0.43782	0.343572	GeneID:100154993,Genbank:NM_001206399.1	acetyl-CoA carboxylase beta		GO:0003989,GO:0004075,GO:0005524,GO:0005634,GO:0005739,GO:0005741,GO:0005829,GO:0006084,GO:0006633,GO:0006768,GO:0006853,GO:0009374,GO:0010629,GO:0010884,GO:0010906,GO:0012505,GO:0014070,GO:0031325,GO:0031667,GO:0031999,GO:0042493,GO:0042802,GO:0043086,GO:0045540,GO:0046872,GO:0051289,GO:0060421,GO:0097009,GO:2001295	acetyl-CoA carboxylase activity|biotin carboxylase activity|ATP binding|nucleus|mitochondrion|mitochondrial outer membrane|cytosol|acetyl-CoA metabolic process|fatty acid biosynthetic process|biotin metabolic process|carnitine shuttle|biotin binding|negative regulation of gene expression|positive regulation of lipid storage|regulation of glucose metabolic process|endomembrane system|response to o…	ko00061,ko00620,ko04922,ko04920,ko04910,ko00640,ko00254	Fatty acid biosynthesis|Pyruvate metabolism|Glucagon signaling pathway|Adipocytokine signaling pathway|Insulin signaling pathway|Propanoate metabolism|Aflatoxin biosynthesis
ACAD10	362.188	0.125698	0.894246	1.08103	0.112405	0.37119	0.839055	4.42457	5.05745	4.79565	5.1262	4.9019	5.56779	GeneID:100157748,Genbank:XM_021073831.1	acyl-CoA dehydrogenase family member 10		GO:0003995,GO:0005739,GO:0005759,GO:0006635,GO:0016787,GO:0033539,GO:0050660	acyl-CoA dehydrogenase activity|mitochondrion|mitochondrial matrix|fatty acid beta-oxidation|hydrolase activity|fatty acid beta-oxidation using acyl-CoA dehydrogenase|flavin adenine dinucleotide binding
ACAD11	382.413	0.395389	0.220475	1.06229	0.0871736	0.825501	0.972327	4.61453	9.28449	8.72248	9.06442	9.69768	5.53449	GeneID:100153698,Genbank:XM_001924765.5	acyl-CoA dehydrogenase family member 11		GO:0005634,GO:0005777,GO:0017099,GO:0031966,GO:0033539,GO:0050660,GO:0070991	nucleus|peroxisome|very-long-chain-acyl-CoA dehydrogenase activity|mitochondrial membrane|fatty acid beta-oxidation using acyl-CoA dehydrogenase|flavin adenine dinucleotide binding|medium-chain-acyl-CoA dehydrogenase activity
ACAD8	416.642	0.126193	0.330034	1.02929	0.041648	0.741374	0.955023	12.4912	9.81397	10.1879	10.9554	11.9506	10.9222	GeneID:100627341,Genbank:XM_021102134.1	acyl-CoA dehydrogenase family member 8		GO:0003995,GO:0005739,GO:0006574,GO:0006629,GO:0050660	acyl-CoA dehydrogenase activity|mitochondrion|valine catabolic process|lipid metabolic process|flavin adenine dinucleotide binding	ko00280	Valine, leucine and isoleucine degradation
ACAD9	652.857	0.106792	0.272992	1.02041	0.0291534	0.78486	0.963641	17.3643	16.0157	14.651	14.7368	16.921	17.8907	GeneID:100621922,Genbank:XM_021069406.1	acyl-CoA dehydrogenase family member 9		GO:0001676,GO:0004466,GO:0005634,GO:0005739,GO:0005743,GO:0030425,GO:0031966,GO:0032981,GO:0050660,GO:0051791,GO:0070991	long-chain fatty acid metabolic process|long-chain-acyl-CoA dehydrogenase activity|nucleus|mitochondrion|mitochondrial inner membrane|dendrite|mitochondrial membrane|mitochondrial respiratory chain complex I assembly|flavin adenine dinucleotide binding|medium-chain fatty acid metabolic process|medium-chain-acyl-CoA dehydrogenase activity
ACADL	648.914	0.095619	0.918367	1.06276	0.0878134	0.358427	0.833032	21.5111	20.8287	21.8086	22.3297	22.4993	24.094	GeneID:396931,Genbank:NM_213897.1	acyl-CoA dehydrogenase, long chain		GO:0004466,GO:0005759,GO:0042758,GO:0050660	long-chain-acyl-CoA dehydrogenase activity|mitochondrial matrix|long-chain fatty acid catabolic process|flavin adenine dinucleotide binding	ko03320,ko01212,ko00071	PPAR signaling pathway|Fatty acid metabolism|Fatty acid degradation
ACADM	621.975	0.111781	-0.627244	0.952563	-0.070114	0.530499	0.910566	20.2005	21.8466	18.4304	18.5256	17.6831	21.9966	GeneID:397104,Genbank:NM_214039.1	acyl-CoA dehydrogenase, C-4 to C-12 straight chain		GO:0003995,GO:0005759,GO:0006635,GO:0033539,GO:0050660,GO:0070991	acyl-CoA dehydrogenase activity|mitochondrial matrix|fatty acid beta-oxidation|fatty acid beta-oxidation using acyl-CoA dehydrogenase|flavin adenine dinucleotide binding|medium-chain-acyl-CoA dehydrogenase activity	ko00071,ko00410,ko01200,ko00280,ko00640,ko01212,ko03320	Fatty acid degradation|beta-Alanine metabolism|Carbon metabolism|Valine, leucine and isoleucine degradation|Propanoate metabolism|Fatty acid metabolism|PPAR signaling pathway
ACADS	536.708	0.115823	0.276816	1.02247	0.0320617	0.781921	0.962684	14.905	16.6259	13.3126	16.5554	15.3884	14.3935	GeneID:396932,Genbank:XM_005670708.3	acyl-CoA dehydrogenase, C-2 to C-3 short chain		GO:0003995,GO:0004085,GO:0005759,GO:0006631,GO:0050660	acyl-CoA dehydrogenase activity|butyryl-CoA dehydrogenase activity|mitochondrial matrix|fatty acid metabolic process|flavin adenine dinucleotide binding	ko00650,ko01212,ko00280,ko00071,ko01200	Butanoate metabolism|Fatty acid metabolism|Valine, leucine and isoleucine degradation|Fatty acid degradation|Carbon metabolism
ACADSB	1152.01	0.077585	1.27245	1.07083	0.0987231	0.203213	0.704751	11.3538	11.3578	10.6158	11.9748	11.8423	12.2573	GeneID:100154810,Genbank:XM_001926297.4	acyl-CoA dehydrogenase, short/branched chain		GO:0003995,GO:0005759,GO:0006631,GO:0050660	acyl-CoA dehydrogenase activity|mitochondrial matrix|fatty acid metabolic process|flavin adenine dinucleotide binding	ko01212,ko00280,ko00071	Fatty acid metabolism|Valine, leucine and isoleucine degradation|Fatty acid degradation
ACADVL	1132.3	0.0814182	1.53792	1.09067	0.125215	0.124068	0.590448	14.0309	12.7655	12.5018	14.8167	14.0488	14.4632	GeneID:100520636,Genbank:XM_021067809.1	acyl-CoA dehydrogenase, very long chain		GO:0001659,GO:0004466,GO:0005730,GO:0005743,GO:0005829,GO:0009409,GO:0030855,GO:0033539,GO:0042645,GO:0045717,GO:0046322,GO:0050660,GO:0090181	temperature homeostasis|long-chain-acyl-CoA dehydrogenase activity|nucleolus|mitochondrial inner membrane|cytosol|response to cold|epithelial cell differentiation|fatty acid beta-oxidation using acyl-CoA dehydrogenase|mitochondrial nucleoid|negative regulation of fatty acid biosynthetic process|negative regulation of fatty acid oxidation|flavin adenine dinucleotide binding|regulation of cholester…	ko01212,ko00071	Fatty acid metabolism|Fatty acid degradation
ACAN	107.101	0.238434	0.315869	1.05359	0.0753139	0.752102	0.957486	0.841996	0.521477	0.554243	0.69665	0.741456	0.606579	GeneID:397255,Genbank:XM_021098297.1	aggrecan		GO:0001501,GO:0005201,GO:0005509,GO:0005540,GO:0005576,GO:0005578,GO:0007155,GO:0007417,GO:0030246	skeletal system development|extracellular matrix structural constituent|calcium ion binding|hyaluronic acid binding|extracellular region|proteinaceous extracellular matrix|cell adhesion|central nervous system development|carbohydrate binding
ACAP1	44.2665	0.338997	0.262599	1.06365	0.0890203	0.79286	0.965861	0.391475	0.492697	0.462157	0.367084	0.476776	0.602374	GeneID:100623422,Genbank:XM_021067819.1	ArfGAP with coiled-coil, ankyrin repeat and PH domains 1		GO:0004871,GO:0005096,GO:0016787,GO:0046872,GO:0055038	signal transducer activity|GTPase activator activity|hydrolase activity|metal ion binding|recycling endosome membrane	ko04144	Endocytosis
ACAP2	1056.49	0.0855654	1.91771	1.12046	0.16409	0.0551477	0.429031	6.48412	6.5954	7.42302	7.72555	7.78107	7.7243	GeneID:100627914,Genbank:XM_021070084.1	ArfGAP with coiled-coil, ankyrin repeat and PH domains 2		GO:0005096,GO:0010008,GO:0016020,GO:0017137,GO:0036010,GO:0046872,GO:0080025,GO:1990090	GTPase activator activity|endosome membrane|membrane|Rab GTPase binding|protein localization to endosome|metal ion binding|phosphatidylinositol-3,5-bisphosphate binding|cellular response to nerve growth factor stimulus	ko04144	Endocytosis
ACAP3	977.132	0.0894665	0.68794	1.04358	0.0615476	0.491491	0.898814	9.54282	8.39365	9.12392	9.58185	10.0605	8.91906	GeneID:100524443,Genbank:XM_005653336.3	ArfGAP with coiled-coil, ankyrin repeat and PH domains 3		GO:0005096,GO:0046872	GTPase activator activity|metal ion binding	ko04144	Endocytosis
ACAT1	869.321	0.111771	0.019152	1.00148	0.00214064	0.98472	0.997142	33.4765	28.9846	30.1664	30.6115	26.4238	36.7248	GeneID:100626793,Genbank:XM_005667301.3	acetyl-CoA acetyltransferase 1		GO:0003985,GO:0005739,GO:0005743,GO:0006085,GO:0006550,GO:0006635,GO:0015937,GO:0016830,GO:0016885,GO:0046356,GO:0046872,GO:0046952,GO:1902860	acetyl-CoA C-acetyltransferase activity|mitochondrion|mitochondrial inner membrane|acetyl-CoA biosynthetic process|isoleucine catabolic process|fatty acid beta-oxidation|coenzyme A biosynthetic process|carbon-carbon lyase activity|ligase activity, forming carbon-carbon bonds|acetyl-CoA catabolic process|metal ion binding|ketone body catabolic process|propionyl-CoA biosynthetic process	ko00900,ko01200,ko00071,ko00380,ko00310,ko00072,ko00620,ko00630,ko00720,ko00280,ko02020,ko01212,ko00650,ko00640,ko00362	Terpenoid backbone biosynthesis|Carbon metabolism|Fatty acid degradation|Tryptophan metabolism|Lysine degradation|Synthesis and degradation of ketone bodies|Pyruvate metabolism|Glyoxylate and dicarboxylate metabolism|Carbon fixation pathways in prokaryotes|Valine, leucine and isoleucine degradation|Two-component system|Fatty acid metabolism|Butanoate metabolism|Propanoate metabolism|Benzoate degr…
ACAT2	1723.79	0.0961076	3.85065	1.29242	0.370077	0.000117806	0.0105503	62.0375	52.0377	45.4176	65.705	68.0395	74.6074	GeneID:100152303,Genbank:XM_001928345.4	acetyl-CoA acetyltransferase 2		GO:0003985,GO:0005634,GO:0005730,GO:0005737,GO:0005739,GO:0005829,GO:0006629,GO:0006635,GO:0006695,GO:0070062	acetyl-CoA C-acetyltransferase activity|nucleus|nucleolus|cytoplasm|mitochondrion|cytosol|lipid metabolic process|fatty acid beta-oxidation|cholesterol biosynthetic process|extracellular exosome	ko00900,ko01200,ko00071,ko00380,ko00310,ko00072,ko00620,ko00630,ko00720,ko00280,ko02020,ko01212,ko00650,ko00640,ko00362	Terpenoid backbone biosynthesis|Carbon metabolism|Fatty acid degradation|Tryptophan metabolism|Lysine degradation|Synthesis and degradation of ketone bodies|Pyruvate metabolism|Glyoxylate and dicarboxylate metabolism|Carbon fixation pathways in prokaryotes|Valine, leucine and isoleucine degradation|Two-component system|Fatty acid metabolism|Butanoate metabolism|Propanoate metabolism|Benzoate degr…
ACBD3	517.823	0.119424	-0.109673	0.990963	-0.0130976	0.912669	0.983206	20.1682	19.1061	24.0676	20.0983	22.9673	20.4449	GeneID:494461,Genbank:NM_001009581.1	acyl-CoA binding domain containing 3		GO:0000062,GO:0000139,GO:0005739,GO:0005794,GO:0006694,GO:0034237	fatty-acyl-CoA binding|Golgi membrane|mitochondrion|Golgi apparatus|steroid biosynthetic process|protein kinase A regulatory subunit binding
ACBD4	148.363	0.199688	1.33409	1.2028	0.266401	0.182174	0.682969	1.3143	1.59314	1.51684	2.1035	1.45177	1.8193	GeneID:100520929,Genbank:XM_013980882.2	acyl-CoA binding domain containing 4		GO:0000062,GO:0008289	fatty-acyl-CoA binding|lipid binding
ACBD5	1762.16	0.0684291	0.319992	1.01529	0.0218967	0.748975	0.955818	24.862	26.2922	24.5863	25.772	25.64	26.3226	GeneID:100514676,Genbank:XM_013980249.2	acyl-CoA binding domain containing 5		GO:0000062,GO:0005778,GO:0008289,GO:0016021,GO:0030242	fatty-acyl-CoA binding|peroxisomal membrane|lipid binding|integral component of membrane|autophagy of peroxisome
ACBD6	419.304	0.124649	-0.583954	0.950798	-0.0727894	0.559251	0.920137	7.41704	6.35767	6.83456	6.47466	7.36173	5.98996	GeneID:100525243,Genbank:XM_003130348.5	acyl-CoA binding domain containing 6		GO:0000062,GO:0005737,GO:0008289	fatty-acyl-CoA binding|cytoplasm|lipid binding
ACBD7	22.2936	0.477932	-0.546459	0.834411	-0.26117	0.584751	0.92735	0.745854	0.472542	0.548491	0.476327	0.669396	0.34968	GeneID:100626756,Genbank:XM_003357745.4	acyl-CoA binding domain containing 7		GO:0000062,GO:0008289	fatty-acyl-CoA binding|lipid binding
ACCS	93.8578	0.239247	0.659929	1.11565	0.157886	0.509299	0.905944	2.01457	1.61222	2.19002	1.98628	1.99349	2.58161	GeneID:106504160,Genbank:XM_021083160.1	1-aminocyclopropane-1-carboxylate synthase homolog (inactive)		GO:0003824,GO:0009058,GO:0030170	catalytic activity|biosynthetic process|pyridoxal phosphate binding
ACCSL	25.5262	0.432858	-0.0640008	0.980981	-0.0277033	0.94897	0.989062	0.665004	0.762152	0.554397	0.635798	0.788978	0.54195	GeneID:100521486,Genbank:XM_021083162.1	1-aminocyclopropane-1-carboxylate synthase homolog (inactive) like		GO:0003824,GO:0009058,GO:0030170	catalytic activity|biosynthetic process|pyridoxal phosphate binding
ACD	84.4472	0.237088	0.169082	1.02818	0.0400874	0.865732	0.979791	3.41693	3.09716	3.04492	3.24052	3.16559	3.52777	GeneID:100623181,Genbank:XM_021094094.1	ACD, shelterin complex subunit and telomerase recruitment factor		GO:0000723,GO:0000783,GO:0000784,GO:0005654,GO:0006886,GO:0016233,GO:0016604,GO:0031848,GO:0032202,GO:0032211,GO:0032212,GO:0042162,GO:0044877,GO:0051973,GO:0060381,GO:0070182,GO:0070187,GO:0070198,GO:0070200	telomere maintenance|nuclear telomere cap complex|nuclear chromosome, telomeric region|nucleoplasm|intracellular protein transport|telomere capping|nuclear body|protection from non-homologous end joining at telomere|telomere assembly|negative regulation of telomere maintenance via telomerase|positive regulation of telomere maintenance via telomerase|telomeric DNA binding|macromolecular complex bi…
ACE	436.169	0.124616	4.07274	1.42161	0.507526	4.65e-05	0.00572156	4.63769	4.50606	4.98936	6.25898	7.74668	6.32294	GeneID:613133,Genbank:NM_001083941.2	angiotensin I converting enzyme (peptidyl-dipeptidase A) 1		GO:0004180,GO:0005576,GO:0005737,GO:0005886,GO:0008237,GO:0008241,GO:0016021,GO:0046872	carboxypeptidase activity|extracellular region|cytoplasm|plasma membrane|metallopeptidase activity|peptidyl-dipeptidase activity|integral component of membrane|metal ion binding	ko04614,ko04924	Renin-angiotensin system|Renin secretion
ACE2	5.03727	1.01011	0.637479	1.56257	0.643923	0.523813	0.90937	0.0831969	0.0295916	0.0567485	0.0596573	0.168483	0.0416057	GeneID:100144303,Genbank:XM_021079374.1	angiotensin I converting enzyme 2		GO:0001618,GO:0003051,GO:0004175,GO:0004180,GO:0005615,GO:0005737,GO:0005886,GO:0008237,GO:0008241,GO:0009986,GO:0015827,GO:0016021,GO:0032800,GO:0046813,GO:0046872,GO:0060452,GO:1903598,GO:1903779	virus receptor activity|angiotensin-mediated drinking behavior|endopeptidase activity|carboxypeptidase activity|extracellular space|cytoplasm|plasma membrane|metallopeptidase activity|peptidyl-dipeptidase activity|cell surface|tryptophan transport|integral component of membrane|receptor biosynthetic process|receptor-mediated virion attachment to host cell|metal ion binding|positive regulation of …	ko04974,ko04614	Protein digestion and absorption|Renin-angiotensin system
ACER1	47.8932	0.313155	-1.37159	0.742508	-0.429522	0.17019	0.670575	2.84476	2.58763	2.5766	1.80578	2.06055	2.1456	GeneID:100622165,Genbank:XM_021083989.1	alkaline ceramidase 1		GO:0005783,GO:0005789,GO:0006665,GO:0008544,GO:0010446,GO:0016021,GO:0017040,GO:0019216,GO:0030148,GO:0030154,GO:0030216,GO:0046512,GO:0046514,GO:0071277,GO:0071633	endoplasmic reticulum|endoplasmic reticulum membrane|sphingolipid metabolic process|epidermis development|response to alkaline pH|integral component of membrane|ceramidase activity|regulation of lipid metabolic process|sphingolipid biosynthetic process|cell differentiation|keratinocyte differentiation|sphingosine biosynthetic process|ceramide catabolic process|cellular response to calcium ion|dih…	ko04071,ko00600	Sphingolipid signaling pathway|Sphingolipid metabolism
ACER2	35.0455	0.375566	0.43245	1.11916	0.162413	0.665415	0.938236	0.859801	1.19974	1.35339	1.38719	1.35155	1.12455	GeneID:100155321,Genbank:XM_001926911.5	alkaline ceramidase 2		GO:0001953,GO:0005794,GO:0006672,GO:0006919,GO:0008284,GO:0010942,GO:0017040,GO:0030173,GO:0032526,GO:0033629,GO:0035690,GO:0046512,GO:0071633,GO:0090285	negative regulation of cell-matrix adhesion|Golgi apparatus|ceramide metabolic process|activation of cysteine-type endopeptidase activity involved in apoptotic process|positive regulation of cell proliferation|positive regulation of cell death|ceramidase activity|integral component of Golgi membrane|response to retinoic acid|negative regulation of cell adhesion mediated by integrin|cellular respo…	ko04071,ko00600	Sphingolipid signaling pathway|Sphingolipid metabolism
ACER3	1279.57	0.0778959	-1.69308	0.912639	-0.131884	0.0904408	0.529347	7.27529	6.52864	7.03554	6.32885	6.2572	6.64317	GeneID:100524160,Genbank:XM_021062556.1	alkaline ceramidase 3		GO:0005789,GO:0006672,GO:0008284,GO:0030148,GO:0030173,GO:0030176,GO:0046512,GO:0070774,GO:0071602	endoplasmic reticulum membrane|ceramide metabolic process|positive regulation of cell proliferation|sphingolipid biosynthetic process|integral component of Golgi membrane|integral component of endoplasmic reticulum membrane|sphingosine biosynthetic process|phytoceramidase activity|phytosphingosine biosynthetic process	ko00600	Sphingolipid metabolism
ACHE	997.832	0.0898436	1.07652	1.06934	0.0967186	0.281694	0.775912	14.964	15.4522	16.4893	16.0784	16.0821	18.5486	GeneID:100621099,Genbank:XM_003354481.4	acetylcholinesterase (Cartwright blood group)		GO:0001540,GO:0003990,GO:0005576,GO:0005886,GO:0030054,GO:0031225,GO:0042135,GO:0045202,GO:0052689	amyloid-beta binding|acetylcholinesterase activity|extracellular region|plasma membrane|cell junction|anchored component of membrane|neurotransmitter catabolic process|synapse|carboxylic ester hydrolase activity	ko00564,ko04725	Glycerophospholipid metabolism|Cholinergic synapse
ACIN1	1676.45	0.0706828	0.569131	1.02828	0.0402278	0.569267	0.92259	11.14	11.3664	11.0652	11.9121	11.8671	11.1224	GeneID:100156353,Genbank:XM_013978220.2	apoptotic chromatin condensation inducer 1		GO:0003676,GO:0003723,GO:0005634,GO:0005654,GO:0005730,GO:0005829,GO:0005886,GO:0006397,GO:0008380,GO:0016607,GO:0016887,GO:0019899,GO:0030218,GO:0030263,GO:0043065,GO:0045657,GO:0048025,GO:0061574,GO:0097194	nucleic acid binding|RNA binding|nucleus|nucleoplasm|nucleolus|cytosol|plasma membrane|mRNA processing|RNA splicing|nuclear speck|ATPase activity|enzyme binding|erythrocyte differentiation|apoptotic chromosome condensation|positive regulation of apoptotic process|positive regulation of monocyte differentiation|negative regulation of mRNA splicing, via spliceosome|ASAP complex|execution phase of a…	ko03040,ko03015,ko03013	Spliceosome|mRNA surveillance pathway|RNA transport
ACKR1	950.12	0.104951	-3.06756	0.799992	-0.321943	0.00215817	0.0701382	48.76	54.9226	61.8599	44.182	40.5479	49.1703	GeneID:100154447,Genbank:NM_001244095.1	atypical chemokine receptor 1 (Duffy blood group)		GO:0004888,GO:0004930,GO:0005769,GO:0006954,GO:0016021,GO:0019957,GO:0032642,GO:0055037,GO:0070098	transmembrane signaling receptor activity|G-protein coupled receptor activity|early endosome|inflammatory response|integral component of membrane|C-C chemokine binding|regulation of chemokine production|recycling endosome|chemokine-mediated signaling pathway
ACKR2	56.0074	0.306112	1.52212	1.38122	0.465939	0.127979	0.598327	0.295279	0.239731	0.407196	0.448782	0.425434	0.442995	GeneID:100737352,Genbank:XM_021068500.1	atypical chemokine receptor 2		GO:0004950,GO:0005044,GO:0005654,GO:0005769,GO:0005829,GO:0005884,GO:0005886,GO:0005887,GO:0006935,GO:0006954,GO:0006955,GO:0007186,GO:0007275,GO:0016493,GO:0019957,GO:0031965,GO:0043231,GO:0055037	chemokine receptor activity|scavenger receptor activity|nucleoplasm|early endosome|cytosol|actin filament|plasma membrane|integral component of plasma membrane|chemotaxis|inflammatory response|immune response|G-protein coupled receptor signaling pathway|multicellular organism development|C-C chemokine receptor activity|C-C chemokine binding|nuclear membrane|intracellular membrane-bounded organell…
ACKR3	166.467	0.174786	-0.340955	0.959534	-0.0595942	0.733137	0.952142	4.52931	4.77678	4.6611	4.61678	4.85766	4.08236	GeneID:100515346,Genbank:XM_003133759.4	atypical chemokine receptor 3		GO:0001525,GO:0001570,GO:0005044,GO:0005768,GO:0005769,GO:0005886,GO:0005905,GO:0006935,GO:0007155,GO:0009986,GO:0015026,GO:0016021,GO:0016494,GO:0019958,GO:0031623,GO:0043231,GO:0048471,GO:0055037,GO:0070374,GO:1902230	angiogenesis|vasculogenesis|scavenger receptor activity|endosome|early endosome|plasma membrane|clathrin-coated pit|chemotaxis|cell adhesion|cell surface|coreceptor activity|integral component of membrane|C-X-C chemokine receptor activity|C-X-C chemokine binding|receptor internalization|intracellular membrane-bounded organelle|perinuclear region of cytoplasm|recycling endosome|positive regulation…	ko04060	Cytokine-cytokine receptor interaction
ACKR4	3.80022	1.12469	0.808596	1.87829	0.909417	0.418747	0.863988	0.073775	0.118082	0.113224	0.0793517	0.20373	0.295151	GeneID:100037292,Genbank:NM_001097430.1	atypical chemokine receptor 4		GO:0004950,GO:0005044,GO:0005769,GO:0005886,GO:0006935,GO:0016021,GO:0019956,GO:0055037	chemokine receptor activity|scavenger receptor activity|early endosome|plasma membrane|chemotaxis|integral component of membrane|chemokine binding|recycling endosome
ACLY	4083.93	0.0566825	-0.866278	0.966537	-0.0491028	0.386338	0.847566	56.4189	54.1264	52.504	53.7624	52.7135	52.8336	GeneID:100125957,Genbank:XM_021066025.1	ATP citrate lyase				ko00020,ko00720	Citrate cycle (TCA cycle)|Carbon fixation pathways in prokaryotes
ACO1	673.334	0.104422	1.66315	1.12792	0.173668	0.0962828	0.538234	11.3555	9.92723	9.21889	12.2139	11.0947	11.4655	GeneID:100628006,Genbank:XM_003357729.3	aconitase 1		GO:0003994,GO:0005737,GO:0006099,GO:0006101,GO:0006879,GO:0008198,GO:0010040,GO:0030350,GO:0051538,GO:0051539	aconitate hydratase activity|cytoplasm|tricarboxylic acid cycle|citrate metabolic process|cellular iron ion homeostasis|ferrous iron binding|response to iron(II) ion|iron-responsive element binding|3 iron, 4 sulfur cluster binding|4 iron, 4 sulfur cluster binding	ko01200,ko00630,ko00020,ko00720,ko01210,ko01230	Carbon metabolism|Glyoxylate and dicarboxylate metabolism|Citrate cycle (TCA cycle)|Carbon fixation pathways in prokaryotes|2-Oxocarboxylic acid metabolism|Biosynthesis of amino acids
ACO2	7709.9	0.0499273	1.02557	1.03613	0.051204	0.305094	0.794905	164.243	167.239	162.067	173.247	172.849	170.888	GeneID:396999,Genbank:NM_213954.1	aconitase 2		GO:0003994,GO:0005739,GO:0006099,GO:0046872,GO:0051539	aconitate hydratase activity|mitochondrion|tricarboxylic acid cycle|metal ion binding|4 iron, 4 sulfur cluster binding	ko01200,ko00630,ko00020,ko00720,ko01210,ko01230	Carbon metabolism|Glyoxylate and dicarboxylate metabolism|Citrate cycle (TCA cycle)|Carbon fixation pathways in prokaryotes|2-Oxocarboxylic acid metabolism|Biosynthesis of amino acids
ACOT11	358.238	0.137312	4.18138	1.4888	0.574154	2.9e-05	0.00400613	1.70281	2.19914	1.74865	3.0548	2.74157	2.70234	GeneID:110261225,Genbank:XM_021096589.1	acyl-CoA thioesterase 11		GO:0005829,GO:0006631,GO:0006637,GO:0008289,GO:0009266,GO:0009409,GO:0035556,GO:0047617,GO:0052689	cytosol|fatty acid metabolic process|acyl-CoA metabolic process|lipid binding|response to temperature stimulus|response to cold|intracellular signal transduction|acyl-CoA hydrolase activity|carboxylic ester hydrolase activity
ACOT12	4.49747	1.05643	0.360389	1.302	0.380726	0.718556	0.948199	0.0818179	0.0124719	0.0478353	0.0628591	0.0903763	0.0350709	GeneID:100738062,Genbank:XM_003480872.4	acyl-CoA thioesterase 12		GO:0003986,GO:0005524,GO:0005829,GO:0006084,GO:0006090,GO:0006631,GO:0006637,GO:0008289,GO:0047617,GO:0052689	acetyl-CoA hydrolase activity|ATP binding|cytosol|acetyl-CoA metabolic process|pyruvate metabolic process|fatty acid metabolic process|acyl-CoA metabolic process|lipid binding|acyl-CoA hydrolase activity|carboxylic ester hydrolase activity	ko00620	Pyruvate metabolism
ACOT13	460.42	0.111802	1.85109	1.15425	0.206956	0.0641571	0.458996	4.27165	4.28992	4.34086	4.60495	5.27359	5.181	GeneID:100514587,Genbank:XM_013977469.2	acyl-CoA thioesterase 13		GO:0005634,GO:0005737,GO:0005739,GO:0005819,GO:0005829,GO:0006637,GO:0047617,GO:0051289,GO:0070062	nucleus|cytoplasm|mitochondrion|spindle|cytosol|acyl-CoA metabolic process|acyl-CoA hydrolase activity|protein homotetramerization|extracellular exosome
ACOT6	46.7452	0.322524	0.371851	1.08668	0.119931	0.710004	0.946092	1.6688	1.54326	1.97302	1.67528	2.21203	1.81745	GeneID:100152868,Genbank:XM_001929018.5	acyl-CoA thioesterase 6		GO:0005777,GO:0006631,GO:0006637,GO:0047617,GO:0052689	peroxisome|fatty acid metabolic process|acyl-CoA metabolic process|acyl-CoA hydrolase activity|carboxylic ester hydrolase activity
ACOT7	2810.74	0.0618628	-2.67061	0.891798	-0.165211	0.00757142	0.148468	82.6777	86.8872	82.5899	72.8253	77.8207	76.7137	GeneID:100514773,Genbank:XM_003127525.6	acyl-CoA thioesterase 7		GO:0000062,GO:0005654,GO:0005739,GO:0005829,GO:0006637,GO:0015937,GO:0016290,GO:0036042,GO:0036114,GO:0036116,GO:0042803,GO:0047617,GO:0051792,GO:0052689,GO:0070062,GO:0102991,GO:1900535	fatty-acyl-CoA binding|nucleoplasm|mitochondrion|cytosol|acyl-CoA metabolic process|coenzyme A biosynthetic process|palmitoyl-CoA hydrolase activity|long-chain fatty acyl-CoA binding|medium-chain fatty-acyl-CoA catabolic process|long-chain fatty-acyl-CoA catabolic process|protein homodimerization activity|acyl-CoA hydrolase activity|medium-chain fatty acid biosynthetic process|carboxylic ester hy…	ko01040,ko00062	Biosynthesis of unsaturated fatty acids|Fatty acid elongation
ACOT8	491.234	0.126822	0.191139	1.01694	0.0242407	0.848417	0.977948	20.4074	27.2442	22.5804	22.8439	26.3671	22.997	GeneID:100157173,Genbank:XM_001928889.4	acyl-CoA thioesterase 8		GO:0003986,GO:0005102,GO:0005739,GO:0005782,GO:0006637,GO:0006699,GO:0009062,GO:0016032,GO:0016289,GO:0016290,GO:0016559,GO:0033540,GO:0033882,GO:0036109,GO:0043649,GO:0045225,GO:0047617,GO:0052689,GO:0052815	acetyl-CoA hydrolase activity|receptor binding|mitochondrion|peroxisomal matrix|acyl-CoA metabolic process|bile acid biosynthetic process|fatty acid catabolic process|viral process|CoA hydrolase activity|palmitoyl-CoA hydrolase activity|peroxisome fission|fatty acid beta-oxidation using acyl-CoA oxidase|choloyl-CoA hydrolase activity|alpha-linolenic acid metabolic process|dicarboxylic acid catabo…	ko04146,ko00120	Peroxisome|Primary bile acid biosynthesis
ACOT9	300.565	0.14237	1.34094	1.14148	0.190909	0.179941	0.6811	7.42214	5.88725	5.89146	6.89993	7.40043	7.8614	GeneID:100525265,Genbank:XM_013986010.2	acyl-CoA thioesterase 9		GO:0005739,GO:0052689	mitochondrion|carboxylic ester hydrolase activity
ACOX1	2531.3	0.0655494	-0.591024	0.973504	-0.0387412	0.554505	0.918362	20.4439	18.1736	19.1826	18.8856	18.7974	19.2064	GeneID:100113422,Genbank:XM_021066015.1	acyl-CoA oxidase 1		GO:0003995,GO:0003997,GO:0005777,GO:0006091,GO:0006629,GO:0006693,GO:0019395,GO:0033539,GO:0033540,GO:0050660,GO:0071949	acyl-CoA dehydrogenase activity|acyl-CoA oxidase activity|peroxisome|generation of precursor metabolites and energy|lipid metabolic process|prostaglandin metabolic process|fatty acid oxidation|fatty acid beta-oxidation using acyl-CoA dehydrogenase|fatty acid beta-oxidation using acyl-CoA oxidase|flavin adenine dinucleotide binding|FAD binding	ko04024,ko00592,ko00071,ko04146,ko01040,ko03320,ko01212	cAMP signaling pathway|alpha-Linolenic acid metabolism|Fatty acid degradation|Peroxisome|Biosynthesis of unsaturated fatty acids|PPAR signaling pathway|Fatty acid metabolism
ACOX2	72.5688	0.273009	0.249419	1.04833	0.0680936	0.803036	0.967983	1.07941	1.70847	1.19642	1.29645	1.39103	1.52943	GeneID:100516877,Genbank:XM_021069070.1	acyl-CoA oxidase 2		GO:0003995,GO:0003997,GO:0005102,GO:0005777,GO:0005782,GO:0005829,GO:0006699,GO:0010942,GO:0016402,GO:0033539,GO:0033540,GO:0033791,GO:0042803,GO:0043231,GO:0050660,GO:0071949,GO:1902884	acyl-CoA dehydrogenase activity|acyl-CoA oxidase activity|receptor binding|peroxisome|peroxisomal matrix|cytosol|bile acid biosynthetic process|positive regulation of cell death|pristanoyl-CoA oxidase activity|fatty acid beta-oxidation using acyl-CoA dehydrogenase|fatty acid beta-oxidation using acyl-CoA oxidase|3alpha,7alpha,12alpha-trihydroxy-5beta-cholestanoyl-CoA 24-hydroxylase activity|prote…	ko03320,ko04146,ko00120	PPAR signaling pathway|Peroxisome|Primary bile acid biosynthesis
ACOX3	804.394	0.0889921	-1.82682	0.893431	-0.162572	0.0677274	0.468566	12.53	13.3392	12.524	11.7653	11.6831	11.2298	GeneID:100523005,Genbank:XM_021100951.1	acyl-CoA oxidase 3, pristanoyl		GO:0003995,GO:0005102,GO:0005739,GO:0005777,GO:0005782,GO:0016020,GO:0016402,GO:0033539,GO:0033540,GO:0050660,GO:0071949	acyl-CoA dehydrogenase activity|receptor binding|mitochondrion|peroxisome|peroxisomal matrix|membrane|pristanoyl-CoA oxidase activity|fatty acid beta-oxidation using acyl-CoA dehydrogenase|fatty acid beta-oxidation using acyl-CoA oxidase|flavin adenine dinucleotide binding|FAD binding	ko04024,ko00592,ko00071,ko04146,ko01040,ko03320,ko01212	cAMP signaling pathway|alpha-Linolenic acid metabolism|Fatty acid degradation|Peroxisome|Biosynthesis of unsaturated fatty acids|PPAR signaling pathway|Fatty acid metabolism
ACOXL	27.2709	0.473258	-0.149264	0.952215	-0.0706403	0.881346	0.980832	0.304075	0.300428	0.38025	0.1817	0.223922	0.540672	GeneID:100520554,Genbank:XM_021087042.1	acyl-CoA oxidase like		GO:0003995,GO:0005782,GO:0016402,GO:0033539,GO:0033540,GO:0050660	acyl-CoA dehydrogenase activity|peroxisomal matrix|pristanoyl-CoA oxidase activity|fatty acid beta-oxidation using acyl-CoA dehydrogenase|fatty acid beta-oxidation using acyl-CoA oxidase|flavin adenine dinucleotide binding
ACP1	715.096	0.0939874	-0.188285	0.987809	-0.0176965	0.850653	0.977948	23.4881	23.7592	21.4067	22.1426	22.6049	23.7976	GeneID:100737301,Genbank:XM_003481310.3	acid phosphatase 1, soluble		GO:0003993,GO:0004726,GO:0005829,GO:0009898,GO:0042383	acid phosphatase activity|non-membrane spanning protein tyrosine phosphatase activity|cytosol|cytoplasmic side of plasma membrane|sarcolemma
ACP2	728.859	0.114635	1.64848	1.13995	0.188973	0.0992545	0.546246	19.573	19.5552	17.2854	23.3917	23.5539	18.0644	GeneID:100513002,Genbank:NM_001244740.1	acid phosphatase 2, lysosomal		GO:0001501,GO:0003993,GO:0005765,GO:0007040,GO:0016021,GO:0043202	skeletal system development|acid phosphatase activity|lysosomal membrane|lysosome organization|integral component of membrane|lysosomal lumen	ko04142	Lysosome
ACP5	4.97389	1.07414	-0.521736	0.678105	-0.56042	0.601854	0.931086	0.213805	0.199623	0.0820329	0	0.206649	0.133652	GeneID:397414,Genbank:XM_021081258.1	acid phosphatase 5, tartrate resistant		GO:0003993,GO:0005576,GO:0005764,GO:0006811,GO:0008198,GO:0008199,GO:0032496,GO:0032691,GO:0032695,GO:0032720,GO:0032929,GO:0034097,GO:0045019,GO:0045453,GO:0050728,GO:0050830,GO:0055072,GO:0060349	acid phosphatase activity|extracellular region|lysosome|ion transport|ferrous iron binding|ferric iron binding|response to lipopolysaccharide|negative regulation of interleukin-1 beta production|negative regulation of interleukin-12 production|negative regulation of tumor necrosis factor production|negative regulation of superoxide anion generation|response to cytokine|negative regulation of nitr…	ko04142,ko04380	Lysosome|Osteoclast differentiation
ACP6	661.797	0.12748	1.40508	1.13219	0.179119	0.159998	0.655007	17.1939	23.831	18.2805	22.3108	25.2781	20.2874	GeneID:100156584,Genbank:XM_001928346.6	acid phosphatase 6, lysophosphatidic		GO:0002244,GO:0003993,GO:0005739,GO:0052642,GO:2001311	hematopoietic progenitor cell differentiation|acid phosphatase activity|mitochondrion|lysophosphatidic acid phosphatase activity|lysobisphosphatidic acid metabolic process
ACPT	187.43	0.203691	-1.73433	0.78281	-0.353266	0.0828604	0.507243	5.78784	8.3043	7.36044	6.01432	6.79059	4.18629	GeneID:100620403,Genbank:XM_013998709.2	acid phosphatase, testicular		GO:0003993,GO:0016021,GO:0042476	acid phosphatase activity|integral component of membrane|odontogenesis
ACRBP	20.3139	0.505651	0.453684	1.17235	0.229406	0.650056	0.937251	0.675859	0.412098	0.321055	0.675024	0.58658	0.410415	GeneID:397317,Genbank:XM_003126533.4	acrosin binding protein		GO:0001669,GO:0002080,GO:0005576,GO:0005634,GO:0048240	acrosomal vesicle|acrosomal membrane|extracellular region|nucleus|sperm capacitation
ACSBG1	3988.84	0.0719533	4.41959	1.2466	0.318004	9.89e-06	0.00177119	49.6607	47.3461	42.0383	62.2452	55.9492	56.9656	GeneID:100156446,Genbank:XM_021098835.1	acyl-CoA synthetase bubblegum family member 1		GO:0000038,GO:0004467,GO:0005524,GO:0005783,GO:0031410,GO:0031957,GO:0051384,GO:0102391	very long-chain fatty acid metabolic process|long-chain fatty acid-CoA ligase activity|ATP binding|endoplasmic reticulum|cytoplasmic vesicle|very long-chain fatty acid-CoA ligase activity|response to glucocorticoid|decanoate--CoA ligase activity	ko00061,ko04920,ko03320,ko01212,ko00071	Fatty acid biosynthesis|Adipocytokine signaling pathway|PPAR signaling pathway|Fatty acid metabolism|Fatty acid degradation
ACSF2	908.514	0.111715	3.55187	1.31658	0.396798	0.000382506	0.0233684	20.4882	23.0306	17.4729	29.9092	27.1961	24.0274	GeneID:100512859,Genbank:XM_003131573.4	acyl-CoA synthetase family member 2		GO:0005524,GO:0005739,GO:0006631,GO:0016874	ATP binding|mitochondrion|fatty acid metabolic process|ligase activity
ACSF3	335.226	0.13215	0.516194	1.04842	0.0682149	0.605719	0.931086	4.10722	3.36853	3.68818	4.17096	3.89734	3.76925	GeneID:100739500,Genbank:XM_021093626.1	acyl-CoA synthetase family member 3		GO:0005524,GO:0005739,GO:0006633,GO:0090409,GO:0090410	ATP binding|mitochondrion|fatty acid biosynthetic process|malonyl-CoA synthetase activity|malonate catabolic process	ko00280	Valine, leucine and isoleucine degradation
ACSL1	1636.07	0.0773974	1.04814	1.05784	0.0811237	0.294572	0.785316	19.211	17.5517	18.9893	18.743	21.4437	19.4614	GeneID:448982,Genbank:XM_005671708.3	acyl-CoA synthetase long-chain family member 1		GO:0001676,GO:0004467,GO:0005524,GO:0005739,GO:0005741,GO:0005778,GO:0005789,GO:0005886,GO:0006641,GO:0007584,GO:0008610,GO:0014070,GO:0016020,GO:0016021,GO:0019216,GO:0033211,GO:0034201,GO:0035338,GO:0036109,GO:0042178,GO:0042493,GO:0043651,GO:0044539,GO:0071902,GO:0102391	long-chain fatty acid metabolic process|long-chain fatty acid-CoA ligase activity|ATP binding|mitochondrion|mitochondrial outer membrane|peroxisomal membrane|endoplasmic reticulum membrane|plasma membrane|triglyceride metabolic process|response to nutrient|lipid biosynthetic process|response to organic cyclic compound|membrane|integral component of membrane|regulation of lipid metabolic process|a…	ko00071,ko00061,ko04146,ko04920,ko03320,ko02024,ko01212	Fatty acid degradation|Fatty acid biosynthesis|Peroxisome|Adipocytokine signaling pathway|PPAR signaling pathway|Quorum sensing|Fatty acid metabolism
ACSL3	4100.97	0.0674035	-1.46275	0.933942	-0.0985945	0.143535	0.625375	45.0659	43.4936	46.2548	40.755	39.9206	46.6414	GeneID:100233169,Genbank:XM_021074568.1	acyl-CoA synthetase long-chain family member 3		GO:0004467,GO:0005524,GO:0005741,GO:0005778,GO:0005783,GO:0005789,GO:0005794,GO:0005811,GO:0006633,GO:0007420,GO:0007584,GO:0014070,GO:0016020,GO:0016021,GO:0019901,GO:0019904,GO:0034379,GO:0035338,GO:0042998,GO:0044539,GO:0048471,GO:0051047,GO:0102391,GO:2001247	long-chain fatty acid-CoA ligase activity|ATP binding|mitochondrial outer membrane|peroxisomal membrane|endoplasmic reticulum|endoplasmic reticulum membrane|Golgi apparatus|lipid droplet|fatty acid biosynthetic process|brain development|response to nutrient|response to organic cyclic compound|membrane|integral component of membrane|protein kinase binding|protein domain specific binding|very-low-d…	ko00071,ko00061,ko04146,ko04920,ko03320,ko02024,ko01212	Fatty acid degradation|Fatty acid biosynthesis|Peroxisome|Adipocytokine signaling pathway|PPAR signaling pathway|Quorum sensing|Fatty acid metabolism
ACSL4	2294.15	0.0671481	-1.95627	0.91297	-0.13136	0.0504331	0.41252	24.4876	23.1616	23.9592	22.0209	20.82	23.2492	GeneID:448980,Genbank:XM_005673819.3	acyl-CoA synthetase long-chain family member 4		GO:0004467,GO:0005524,GO:0005737,GO:0005741,GO:0005778,GO:0005789,GO:0005811,GO:0006629,GO:0006641,GO:0007584,GO:0008610,GO:0015908,GO:0016020,GO:0016021,GO:0030182,GO:0030307,GO:0031957,GO:0032307,GO:0035338,GO:0043025,GO:0044233,GO:0047676,GO:0060136,GO:0060996,GO:0070062,GO:0070672,GO:0102391	long-chain fatty acid-CoA ligase activity|ATP binding|cytoplasm|mitochondrial outer membrane|peroxisomal membrane|endoplasmic reticulum membrane|lipid droplet|lipid metabolic process|triglyceride metabolic process|response to nutrient|lipid biosynthetic process|fatty acid transport|membrane|integral component of membrane|neuron differentiation|positive regulation of cell growth|very long-chain fa…	ko00071,ko00061,ko04146,ko04920,ko03320,ko02024,ko01212	Fatty acid degradation|Fatty acid biosynthesis|Peroxisome|Adipocytokine signaling pathway|PPAR signaling pathway|Quorum sensing|Fatty acid metabolism
ACSL5	163.22	0.222646	-0.875939	0.873558	-0.195024	0.381063	0.844249	2.95587	4.6395	2.79015	2.35884	3.20187	3.60488	GeneID:100157521,Genbank:XM_021072014.1	acyl-CoA synthetase long-chain family member 5		GO:0001676,GO:0004467,GO:0005524,GO:0005634,GO:0005730,GO:0005739,GO:0005741,GO:0005743,GO:0005783,GO:0005789,GO:0016020,GO:0016021,GO:0035338,GO:0102391,GO:2001236	long-chain fatty acid metabolic process|long-chain fatty acid-CoA ligase activity|ATP binding|nucleus|nucleolus|mitochondrion|mitochondrial outer membrane|mitochondrial inner membrane|endoplasmic reticulum|endoplasmic reticulum membrane|membrane|integral component of membrane|long-chain fatty-acyl-CoA biosynthetic process|decanoate--CoA ligase activity|regulation of extrinsic apoptotic signaling …
ACSL6	3207.25	0.0647608	0.637424	1.02903	0.0412801	0.523849	0.90937	26.3853	27.9707	26.5433	29.3405	28.1678	26.644	GeneID:100522126,Genbank:XM_021084743.1	acyl-CoA synthetase long-chain family member 6		GO:0001676,GO:0004467,GO:0005524,GO:0005741,GO:0005778,GO:0005789,GO:0005886,GO:0006637,GO:0016020,GO:0016021,GO:0019899,GO:0035338,GO:0042803,GO:0102391	long-chain fatty acid metabolic process|long-chain fatty acid-CoA ligase activity|ATP binding|mitochondrial outer membrane|peroxisomal membrane|endoplasmic reticulum membrane|plasma membrane|acyl-CoA metabolic process|membrane|integral component of membrane|enzyme binding|long-chain fatty-acyl-CoA biosynthetic process|protein homodimerization activity|decanoate--CoA ligase activity	ko00071,ko00061,ko04146,ko04920,ko03320,ko02024,ko01212	Fatty acid degradation|Fatty acid biosynthesis|Peroxisome|Adipocytokine signaling pathway|PPAR signaling pathway|Quorum sensing|Fatty acid metabolism
ACSM3	30.9523	0.426479	0.0999271	1.02998	0.0426168	0.920402	0.984366	0.734413	0.542528	0.520209	0.384837	0.561624	0.922885	GeneID:100512220,Genbank:XM_021086514.1	acyl-CoA synthetase medium-chain family member 3		GO:0005524,GO:0005759,GO:0006633,GO:0015645,GO:0046872,GO:0047760	ATP binding|mitochondrial matrix|fatty acid biosynthetic process|fatty acid ligase activity|metal ion binding|butyrate-CoA ligase activity	ko00650	Butanoate metabolism
ACSM5	17.8283	0.56339	1.48764	1.78772	0.838121	0.136846	0.616101	0.238377	0.118701	0.276413	0.581164	0.263312	0.301996	GeneID:100511318,Genbank:XM_003124563.6	acyl-CoA synthetase medium-chain family member 5		GO:0003996,GO:0004321,GO:0005524,GO:0005525,GO:0005759,GO:0006633,GO:0006637,GO:0015645,GO:0046872,GO:0047760	acyl-CoA ligase activity|fatty-acyl-CoA synthase activity|ATP binding|GTP binding|mitochondrial matrix|fatty acid biosynthetic process|acyl-CoA metabolic process|fatty acid ligase activity|metal ion binding|butyrate-CoA ligase activity	ko00650	Butanoate metabolism
ACSS1	351.435	0.138409	1.87384	1.19694	0.259356	0.060953	0.450461	3.1742	3.3579	2.55905	3.3261	3.99851	3.67507	GeneID:100154828,Genbank:XM_001927113.6	acyl-CoA synthetase short-chain family member 1		GO:0003987,GO:0005524,GO:0005739,GO:0005759,GO:0006085,GO:0016208,GO:0019413,GO:0019427,GO:0019542	acetate-CoA ligase activity|ATP binding|mitochondrion|mitochondrial matrix|acetyl-CoA biosynthetic process|AMP binding|acetate biosynthetic process|acetyl-CoA biosynthetic process from acetate|propionate biosynthetic process	ko00680,ko01200,ko00620,ko00720,ko00640,ko00010	Methane metabolism|Carbon metabolism|Pyruvate metabolism|Carbon fixation pathways in prokaryotes|Propanoate metabolism|Glycolysis / Gluconeogenesis
ACSS2	535.349	0.10646	-0.422084	0.969333	-0.044935	0.672963	0.938684	9.46625	10.4088	10.7369	10.2594	9.83902	9.90072	GeneID:100153866,Genbank:XM_005672862.3	acyl-CoA synthetase short-chain family member 2		GO:0003987,GO:0005524,GO:0005654,GO:0005737,GO:0005759,GO:0005829,GO:0006069,GO:0007005,GO:0008610,GO:0016208,GO:0019413,GO:0019427,GO:0019542,GO:0043231	acetate-CoA ligase activity|ATP binding|nucleoplasm|cytoplasm|mitochondrial matrix|cytosol|ethanol oxidation|mitochondrion organization|lipid biosynthetic process|AMP binding|acetate biosynthetic process|acetyl-CoA biosynthetic process from acetate|propionate biosynthetic process|intracellular membrane-bounded organelle	ko00680,ko01200,ko00620,ko00720,ko00640,ko00010	Methane metabolism|Carbon metabolism|Pyruvate metabolism|Carbon fixation pathways in prokaryotes|Propanoate metabolism|Glycolysis / Gluconeogenesis
ACSS3	947.42	0.115882	0.246275	1.01998	0.0285389	0.80547	0.968169	4.80564	4.5554	3.84678	4.64523	5.19379	3.77845	GeneID:100512104,Genbank:XM_003481763.4	acyl-CoA synthetase short-chain family member 3		GO:0003987,GO:0005524,GO:0005739,GO:0008152	acetate-CoA ligase activity|ATP binding|mitochondrion|metabolic process	ko00640	Propanoate metabolism
ACTA1	98.5783	0.250158	1.10952	1.21214	0.277555	0.267207	0.764652	2.05887	3.1099	2.27067	3.39365	3.36704	2.3534	GeneID:100154254,Genbank:XM_005670976.2	actin, alpha 1, skeletal muscle		GO:0001725,GO:0005524,GO:0005865,GO:0005884,GO:0030240,GO:0048741	stress fiber|ATP binding|striated muscle thin filament|actin filament|skeletal muscle thin filament assembly|skeletal muscle fiber development
ACTA2	939.69	0.121669	3.08594	1.29726	0.375462	0.00202908	0.0671897	31.222	35.091	34.904	34.8606	53.0886	44.8994	GeneID:733615,Genbank:XM_013983522.2	actin, alpha 2, smooth muscle, aorta		GO:0001725,GO:0005524,GO:0005615,GO:0005737,GO:0005856,GO:0006936,GO:0008217,GO:0009615,GO:0010628,GO:0014829,GO:0015629,GO:0019901,GO:0030027,GO:0030175,GO:0030485,GO:0043234,GO:0044297,GO:0061041,GO:0061870,GO:0061874,GO:0070062,GO:0070374,GO:0072144,GO:0090131,GO:2000491	stress fiber|ATP binding|extracellular space|cytoplasm|cytoskeleton|muscle contraction|regulation of blood pressure|response to virus|positive regulation of gene expression|vascular smooth muscle contraction|actin cytoskeleton|protein kinase binding|lamellipodium|filopodium|smooth muscle contractile fiber|protein complex|cell body|regulation of wound healing|positive regulation of hepatic stellat…	ko04270	Vascular smooth muscle contraction
ACTB	21198.1	0.0522854	0.38246	1.01396	0.0199971	0.70212	0.943543	306.159	307.491	299.63	292.459	325.756	318.16	GeneID:414396,Genbank:XM_021086047.1	actin beta		GO:0000790,GO:0001725,GO:0001895,GO:0002102,GO:0005524,GO:0005615,GO:0005634,GO:0005829,GO:0005856,GO:0005886,GO:0005925,GO:0007409,GO:0007623,GO:0009612,GO:0014069,GO:0015629,GO:0016020,GO:0019894,GO:0019901,GO:0021762,GO:0030424,GO:0030529,GO:0030863,GO:0030957,GO:0031982,GO:0032091,GO:0035267,GO:0035902,GO:0036464,GO:0042802,GO:0043044,GO:0043209,GO:0043234,GO:0045121,GO:0050998,GO:0060041,GO:…	nuclear chromatin|stress fiber|retina homeostasis|podosome|ATP binding|extracellular space|nucleus|cytosol|cytoskeleton|plasma membrane|focal adhesion|axonogenesis|circadian rhythm|response to mechanical stimulus|postsynaptic density|actin cytoskeleton|membrane|kinesin binding|protein kinase binding|substantia nigra development|axon|intracellular ribonucleoprotein complex|cortical cytoskeleton|Ta…	ko04145,ko04520,ko04670,ko04015,ko04390,ko04611,ko04391,ko04510,ko04745,ko04810,ko04530,ko04919,ko04210,ko04921	Phagosome|Adherens junction|Leukocyte transendothelial migration|Rap1 signaling pathway|Hippo signaling pathway|Platelet activation|Hippo signaling pathway - fly|Focal adhesion|Phototransduction - fly|Regulation of actin cytoskeleton|Tight junction|Thyroid hormone signaling pathway|Apoptosis|Oxytocin signaling pathway
ACTC1	47.2925	0.338755	-0.0110117	0.997418	-0.00373026	0.991214	0.998367	1.14103	1.97848	2.15246	1.68751	1.77241	1.85449	GeneID:100152267,Genbank:NM_001170517.2	actin, alpha, cardiac muscle 1		GO:0005524,GO:0005615,GO:0005737,GO:0005884,GO:0005925,GO:0010628,GO:0016020,GO:0016887,GO:0017022,GO:0030017,GO:0030027,GO:0030048,GO:0030175,GO:0030240,GO:0031032,GO:0031674,GO:0033275,GO:0042493,GO:0042643,GO:0043066,GO:0044297,GO:0045471,GO:0055003,GO:0055008,GO:0060047,GO:0060048,GO:0070062,GO:0070252,GO:0072562,GO:0090131	ATP binding|extracellular space|cytoplasm|actin filament|focal adhesion|positive regulation of gene expression|membrane|ATPase activity|myosin binding|sarcomere|lamellipodium|actin filament-based movement|filopodium|skeletal muscle thin filament assembly|actomyosin structure organization|I band|actin-myosin filament sliding|response to drug|actomyosin, actin portion|negative regulation of apoptot…	ko04261,ko04260	Adrenergic signaling in cardiomyocytes|Cardiac muscle contraction
ACTG1	37307.4	0.0455909	0.621697	1.01984	0.0283437	0.534141	0.911901	1085.76	1063.54	1035.43	1065.2	1106.59	1111.93	GeneID:397653,Genbank:XM_003357928.4	actin gamma 1		GO:0001895,GO:0005200,GO:0005522,GO:0005524,GO:0005615,GO:0005634,GO:0005829,GO:0005856,GO:0005884,GO:0005886,GO:0005925,GO:0009612,GO:0015629,GO:0016020,GO:0030016,GO:0031012,GO:0031625,GO:0031941,GO:0042802,GO:0043209,GO:0045214,GO:0045335,GO:0051592,GO:0070062,GO:0070527,GO:0071346,GO:0072562,GO:0097433	retina homeostasis|structural constituent of cytoskeleton|profilin binding|ATP binding|extracellular space|nucleus|cytosol|cytoskeleton|actin filament|plasma membrane|focal adhesion|response to mechanical stimulus|actin cytoskeleton|membrane|myofibril|extracellular matrix|ubiquitin protein ligase binding|filamentous actin|identical protein binding|myelin sheath|sarcomere organization|phagocytic v…	ko04145,ko04520,ko04670,ko04015,ko04390,ko04611,ko04391,ko04510,ko04745,ko04810,ko04530,ko04919,ko04210,ko04921	Phagosome|Adherens junction|Leukocyte transendothelial migration|Rap1 signaling pathway|Hippo signaling pathway|Platelet activation|Hippo signaling pathway - fly|Focal adhesion|Phototransduction - fly|Regulation of actin cytoskeleton|Tight junction|Thyroid hormone signaling pathway|Apoptosis|Oxytocin signaling pathway
ACTG2	56.4588	0.36157	0.371077	1.09746	0.13417	0.71058	0.946092	2.21307	1.40086	2.68646	1.29105	3.3561	2.36353	GeneID:100520667,Genbank:XM_021087371.1	actin, gamma 2, smooth muscle, enteric		GO:0005524,GO:0005615,GO:0005737,GO:0010628,GO:0030027,GO:0030175,GO:0032982,GO:0044297,GO:0070062,GO:0071944,GO:0072562,GO:0090131	ATP binding|extracellular space|cytoplasm|positive regulation of gene expression|lamellipodium|filopodium|myosin filament|cell body|extracellular exosome|cell periphery|blood microparticle|mesenchyme migration	ko04270	Vascular smooth muscle contraction
ACTL6A	194.199	0.162131	1.16423	1.13978	0.188758	0.244331	0.745992	5.90935	5.45001	5.46886	6.54768	6.8555	5.99948	GeneID:100523570,Genbank:XM_003132545.5	actin like 6A		GO:0000790,GO:0003407,GO:0003682,GO:0003713,GO:0005634,GO:0005654,GO:0005886,GO:0006281,GO:0006310,GO:0006338,GO:0006351,GO:0006357,GO:0007165,GO:0016514,GO:0016579,GO:0021510,GO:0031011,GO:0035267,GO:0040008,GO:0043044,GO:0043234,GO:0043967,GO:0043968,GO:0071564,GO:1903146,GO:1903955	nuclear chromatin|neural retina development|chromatin binding|transcription coactivator activity|nucleus|nucleoplasm|plasma membrane|DNA repair|DNA recombination|chromatin remodeling|transcription, DNA-templated|regulation of transcription from RNA polymerase II promoter|signal transduction|SWI/SNF complex|protein deubiquitination|spinal cord development|Ino80 complex|NuA4 histone acetyltransfera…
ACTL6B	782.261	0.0936728	0.501985	1.03313	0.0470223	0.615678	0.931268	28.962	27.5823	24.786	27.3665	29.1885	28.3918	GeneID:100516853,Genbank:XM_013995471.2	actin like 6B		GO:0003713,GO:0005200,GO:0005634,GO:0005730,GO:0006325,GO:0006338,GO:0006351,GO:0006357,GO:0016514,GO:0016569,GO:0021510,GO:0071565	transcription coactivator activity|structural constituent of cytoskeleton|nucleus|nucleolus|chromatin organization|chromatin remodeling|transcription, DNA-templated|regulation of transcription from RNA polymerase II promoter|SWI/SNF complex|covalent chromatin modification|spinal cord development|nBAF complex
ACTN1	1752.36	0.0722119	-0.958014	0.95318	-0.0691801	0.338056	0.819406	30.0761	32.4572	33.22	29.8314	31.5232	30.9359	GeneID:100513412,Genbank:NM_001243061.1	actinin alpha 1		GO:0001725,GO:0001726,GO:0003725,GO:0005178,GO:0005509,GO:0005523,GO:0005884,GO:0005903,GO:0005915,GO:0005916,GO:0005923,GO:0005925,GO:0012506,GO:0016328,GO:0017166,GO:0030018,GO:0030027,GO:0030220,GO:0030374,GO:0030486,GO:0031252,GO:0042383,GO:0042803,GO:0043462,GO:0043495,GO:0044325,GO:0045214,GO:0046928,GO:0048041,GO:0048741,GO:0051015,GO:0051017,GO:0051234,GO:0051271,GO:0051393,GO:0051639,GO:…	stress fiber|ruffle|double-stranded RNA binding|integrin binding|calcium ion binding|tropomyosin binding|actin filament|brush border|zonula adherens|fascia adherens|bicellular tight junction|focal adhesion|vesicle membrane|lateral plasma membrane|vinculin binding|Z disc|lamellipodium|platelet formation|ligand-dependent nuclear receptor transcription coactivator activity|smooth muscle dense body|c…	ko04520,ko04670,ko04810,ko04530,ko04510	Adherens junction|Leukocyte transendothelial migration|Regulation of actin cytoskeleton|Tight junction|Focal adhesion
ACTN2	1149.2	0.113129	-1.75165	0.871661	-0.198161	0.0798346	0.501376	13.5732	15.443	15.7876	12.0865	11.3415	16.064	GeneID:100157406,Genbank:NM_001243666.1	actinin alpha 2		GO:0003779,GO:0005509,GO:0030018	actin binding|calcium ion binding|Z disc	ko04520,ko04670,ko04810,ko04530,ko04510	Adherens junction|Leukocyte transendothelial migration|Regulation of actin cytoskeleton|Tight junction|Focal adhesion
ACTN4	3730.42	0.0599529	0.709	1.0299	0.0425066	0.478325	0.89247	50.5712	51.3417	52.0987	50.9015	56.0686	53.4251	GeneID:100517284,Genbank:XM_003355883.4	actinin alpha 4		GO:0000977,GO:0001725,GO:0001882,GO:0005509,GO:0005634,GO:0005737,GO:0005829,GO:0005903,GO:0005911,GO:0015031,GO:0016604,GO:0030018,GO:0030050,GO:0030335,GO:0030374,GO:0030529,GO:0030863,GO:0031143,GO:0031490,GO:0035357,GO:0042803,GO:0042974,GO:0043234,GO:0044325,GO:0048384,GO:0048471,GO:0048549,GO:0051015,GO:0051017,GO:0051271,GO:0070830,GO:1900025,GO:1901224,GO:1902396	RNA polymerase II regulatory region sequence-specific DNA binding|stress fiber|nucleoside binding|calcium ion binding|nucleus|cytoplasm|cytosol|brush border|cell-cell junction|protein transport|nuclear body|Z disc|vesicle transport along actin filament|positive regulation of cell migration|ligand-dependent nuclear receptor transcription coactivator activity|intracellular ribonucleoprotein complex…	ko04520,ko04670,ko04810,ko04530,ko04510	Adherens junction|Leukocyte transendothelial migration|Regulation of actin cytoskeleton|Tight junction|Focal adhesion
ACTR10	1797.71	0.0829944	-0.363503	0.979306	-0.0301687	0.716229	0.947843	47.6549	40.8534	47.0952	42.1574	43.0305	49.0974	GeneID:100620619,Genbank:XM_003353492.4	actin related protein 10 homolog		GO:0005737,GO:0005869,GO:0007018	cytoplasm|dynactin complex|microtubule-based movement
ACTR1A	6548.48	0.0546673	-1.4766	0.945585	-0.0807216	0.139783	0.621864	132.519	128.938	129.031	129.572	122.296	121.378	GeneID:100156619,Genbank:XM_001928877.5	ARP1 actin related protein 1 homolog A		GO:0005524,GO:0005737,GO:0005813,GO:0005869,GO:0043209,GO:0099738	ATP binding|cytoplasm|centrosome|dynactin complex|myelin sheath|cell cortex region
ACTR1B	653.867	0.101073	0.370756	1.02631	0.0374733	0.710819	0.946092	30.8877	26.177	28.3514	29.0755	28.4088	31.1474	GeneID:100511252,Genbank:XM_021087260.1	ARP1 actin related protein 1 homolog B		GO:0005524,GO:0005737,GO:0005813,GO:0005869,GO:0015630	ATP binding|cytoplasm|centrosome|dynactin complex|microtubule cytoskeleton
ACTR2	7922.99	0.0565631	-1.60201	0.939123	-0.0906145	0.109154	0.565923	117.494	125.494	125.772	116.537	112.082	121.546	GeneID:100174962,Genbank:XM_005662508.3	ARP2 actin related protein 2 homolog		GO:0003779,GO:0005200,GO:0005524,GO:0005576,GO:0005737,GO:0005829,GO:0005885,GO:0005925,GO:0006928,GO:0007163,GO:0008306,GO:0008356,GO:0014069,GO:0015629,GO:0016020,GO:0016344,GO:0016482,GO:0030027,GO:0030478,GO:0033206,GO:0034314,GO:0035578,GO:0035902,GO:0035984,GO:0038096,GO:0043312,GO:0045471,GO:0048013,GO:0051653,GO:0060271,GO:0061003,GO:0061024,GO:0061825,GO:0070062,GO:0071346,GO:0071437,GO:…	actin binding|structural constituent of cytoskeleton|ATP binding|extracellular region|cytoplasm|cytosol|Arp2/3 protein complex|focal adhesion|movement of cell or subcellular component|establishment or maintenance of cell polarity|associative learning|asymmetric cell division|postsynaptic density|actin cytoskeleton|membrane|meiotic chromosome movement towards spindle pole|cytosolic transport|lamel…
ACTR3	2318.85	0.0689327	-0.313252	0.985144	-0.0215933	0.754089	0.958313	110.339	102.164	110.178	110.831	100.973	109.562	GeneID:396738,Genbank:NM_001134343.1	ARP3 actin related protein 3 homolog		GO:0003779,GO:0005524,GO:0005829,GO:0005885,GO:0034314,GO:0042995,GO:0060271	actin binding|ATP binding|cytosol|Arp2/3 protein complex|Arp2/3 complex-mediated actin nucleation|cell projection|cilium assembly
ACTR3B	2520.41	0.06425	-2.43142	0.897374	-0.156219	0.0150397	0.222083	24.9699	23.8858	24.8572	21.6694	21.6554	23.5528	GeneID:102159531,Genbank:XM_021079302.1	ARP3 actin related protein 3 homolog B		GO:0003779,GO:0005524,GO:0005737,GO:0005885,GO:0034314,GO:0042995,GO:0070062	actin binding|ATP binding|cytoplasm|Arp2/3 protein complex|Arp2/3 complex-mediated actin nucleation|cell projection|extracellular exosome
ACTR5	254.244	0.161002	0.934128	1.10987	0.150396	0.350238	0.827408	3.551	2.44295	2.7966	3.40481	3.38052	3.0843	GeneID:100156550,Genbank:XM_021077707.1	ARP5 actin related protein 5 homolog		GO:0005634,GO:0005654,GO:0005737,GO:0006302,GO:0006310,GO:0006351,GO:0006355,GO:0016579,GO:0031011,GO:0070914	nucleus|nucleoplasm|cytoplasm|double-strand break repair|DNA recombination|transcription, DNA-templated|regulation of transcription, DNA-templated|protein deubiquitination|Ino80 complex|UV-damage excision repair
ACTR6	778.784	0.0913035	-1.03138	0.936812	-0.0941689	0.302361	0.792058	24.1339	25.2055	26.3264	24.662	23.1639	23.8368	GeneID:100511382,Genbank:XM_003355672.4	ARP6 actin related protein 6 homolog		GO:0005634,GO:0005737,GO:0005856,GO:0006338	nucleus|cytoplasm|cytoskeleton|chromatin remodeling
ACTR8	412.916	0.123443	-0.089875	0.992339	-0.0110944	0.928387	0.985735	6.06652	7.18888	6.47206	6.8202	6.91997	6.05233	GeneID:100154005,Genbank:XM_013981789.2	ARP8 actin related protein 8 homolog		GO:0005524,GO:0005813,GO:0006281,GO:0006310,GO:0006338,GO:0006351,GO:0006355,GO:0007049,GO:0031011,GO:0051301	ATP binding|centrosome|DNA repair|DNA recombination|chromatin remodeling|transcription, DNA-templated|regulation of transcription, DNA-templated|cell cycle|Ino80 complex|cell division
ACTRT3	12.892	0.615814	0.356675	1.16445	0.219645	0.721335	0.94862	0.19463	0.23963	0.122545	0.257653	0.248065	0.149742	GeneID:100625440,Genbank:XM_003358668.4	actin related protein T3		GO:0001673,GO:0005737,GO:0005856	male germ cell nucleus|cytoplasm|cytoskeleton
ACVR1	727.155	0.0931983	0.991394	1.06614	0.0923962	0.321493	0.80453	7.69011	7.23967	7.94264	7.90206	8.51751	8.24307	GeneID:100152307,Genbank:XM_001927798.7	activin A receptor type 1		GO:0000082,GO:0001569,GO:0001701,GO:0001702,GO:0001707,GO:0001755,GO:0002526,GO:0003143,GO:0003181,GO:0003183,GO:0003203,GO:0003274,GO:0003289,GO:0004672,GO:0004674,GO:0004675,GO:0004702,GO:0005025,GO:0005524,GO:0005887,GO:0006468,GO:0007179,GO:0007281,GO:0007368,GO:0009968,GO:0010862,GO:0016361,GO:0017046,GO:0018107,GO:0030278,GO:0030335,GO:0030501,GO:0030509,GO:0032924,GO:0032926,GO:0042803,GO:…	G1/S transition of mitotic cell cycle|branching involved in blood vessel morphogenesis|in utero embryonic development|gastrulation with mouth forming second|mesoderm formation|neural crest cell migration|acute inflammatory response|embryonic heart tube morphogenesis|atrioventricular valve morphogenesis|mitral valve morphogenesis|endocardial cushion morphogenesis|endocardial cushion fusion|atrial …	ko04060,ko04550,ko04350	Cytokine-cytokine receptor interaction|Signaling pathways regulating pluripotency of stem cells|TGF-beta signaling pathway
ACVR1B	1652.41	0.0706412	-1.11041	0.947081	-0.078441	0.266821	0.764562	16.3033	16.7339	16.8251	16.2709	16.1486	15.3276	GeneID:100152462,Genbank:NM_001195322.1	activin A receptor type 1B		GO:0000082,GO:0001701,GO:0001942,GO:0004674,GO:0004675,GO:0004702,GO:0005524,GO:0005829,GO:0005886,GO:0005887,GO:0006355,GO:0006468,GO:0007165,GO:0007178,GO:0007417,GO:0009986,GO:0010629,GO:0010862,GO:0016361,GO:0018107,GO:0030308,GO:0031625,GO:0032924,GO:0032927,GO:0034711,GO:0038092,GO:0043235,GO:0045648,GO:0045944,GO:0046332,GO:0046545,GO:0046777,GO:0046872,GO:0048179,GO:0048185,GO:0070062,GO:…	G1/S transition of mitotic cell cycle|in utero embryonic development|hair follicle development|protein serine/threonine kinase activity|transmembrane receptor protein serine/threonine kinase activity|signal transducer, downstream of receptor, with serine/threonine kinase activity|ATP binding|cytosol|plasma membrane|integral component of plasma membrane|regulation of transcription, DNA-templated|p…	ko04060,ko04550,ko04350	Cytokine-cytokine receptor interaction|Signaling pathways regulating pluripotency of stem cells|TGF-beta signaling pathway
ACVR1C	117.334	0.260819	0.901444	1.177	0.235114	0.367352	0.836586	0.563066	0.632439	0.800475	0.490878	0.824921	1.06112	GeneID:100156756,Genbank:XM_003133418.5	activin A receptor type 1C		GO:0002021,GO:0004674,GO:0004702,GO:0005524,GO:0005886,GO:0006468,GO:0009749,GO:0016361,GO:0019838,GO:0019915,GO:0030154,GO:0030262,GO:0032868,GO:0038092,GO:0038100,GO:0043280,GO:0046676,GO:0046872,GO:0048179,GO:1901164,GO:1901383	response to dietary excess|protein serine/threonine kinase activity|signal transducer, downstream of receptor, with serine/threonine kinase activity|ATP binding|plasma membrane|protein phosphorylation|response to glucose|activin receptor activity, type I|growth factor binding|lipid storage|cell differentiation|apoptotic nuclear changes|response to insulin|nodal signaling pathway|nodal binding|pos…	ko04550,ko04350	Signaling pathways regulating pluripotency of stem cells|TGF-beta signaling pathway
ACVR2A	228.304	0.156081	-1.53529	0.846963	-0.239629	0.124713	0.591397	10.0215	8.08521	8.8601	7.96219	7.0584	8.06746	GeneID:397282,Genbank:NM_001204765.1	activin A receptor type 2A		GO:0001702,GO:0004702,GO:0005524,GO:0005737,GO:0007283,GO:0007368,GO:0007498,GO:0009952,GO:0009986,GO:0010862,GO:0015026,GO:0016021,GO:0017002,GO:0019838,GO:0030165,GO:0030501,GO:0030509,GO:0030510,GO:0032927,GO:0034673,GO:0034711,GO:0042713,GO:0043084,GO:0043235,GO:0043621,GO:0045648,GO:0045669,GO:0045944,GO:0046872,GO:0048185,GO:0048706,GO:0050999,GO:0060011,GO:0098821	gastrulation with mouth forming second|signal transducer, downstream of receptor, with serine/threonine kinase activity|ATP binding|cytoplasm|spermatogenesis|determination of left/right symmetry|mesoderm development|anterior/posterior pattern specification|cell surface|positive regulation of pathway-restricted SMAD protein phosphorylation|coreceptor activity|integral component of membrane|activin…	ko04060,ko04550,ko04350	Cytokine-cytokine receptor interaction|Signaling pathways regulating pluripotency of stem cells|TGF-beta signaling pathway
ACVR2B	473.739	0.109073	0.47088	1.03624	0.0513603	0.637726	0.935432	2.2826	2.2585	2.16087	2.44523	2.23612	2.33835	GeneID:448845,Genbank:NM_001005350.2	activin A receptor type 2B		GO:0004675,GO:0004702,GO:0005524,GO:0005886,GO:0016021,GO:0046872,GO:1901389	transmembrane receptor protein serine/threonine kinase activity|signal transducer, downstream of receptor, with serine/threonine kinase activity|ATP binding|plasma membrane|integral component of membrane|metal ion binding|negative regulation of transforming growth factor beta activation	ko04060,ko04550,ko04350	Cytokine-cytokine receptor interaction|Signaling pathways regulating pluripotency of stem cells|TGF-beta signaling pathway
ACVRL1	303.593	0.137995	0.116488	1.0112	0.0160748	0.907266	0.983043	4.24692	3.89174	3.40606	3.6728	4.01521	4.11301	GeneID:100153279,Genbank:XM_021091672.1	activin A receptor like type 1		GO:0001525,GO:0004702,GO:0005524,GO:0005886,GO:0016021,GO:0046872,GO:0098821	angiogenesis|signal transducer, downstream of receptor, with serine/threonine kinase activity|ATP binding|plasma membrane|integral component of membrane|metal ion binding|BMP receptor activity
ACY1	334.629	0.142306	1.42171	1.15055	0.202318	0.155111	0.645763	8.81797	8.30069	6.37725	9.25067	8.56617	9.49607	GeneID:396930,Genbank:XM_021068527.1	aminoacylase 1		GO:0004046,GO:0005737,GO:0006520,GO:0008237,GO:0046872	aminoacylase activity|cytoplasm|cellular amino acid metabolic process|metallopeptidase activity|metal ion binding	ko01230,ko00220,ko01210	Biosynthesis of amino acids|Arginine biosynthesis|2-Oxocarboxylic acid metabolism
ACYP1	1109.5	0.0818361	-0.742694	0.958746	-0.0607792	0.457667	0.883459	7.79644	8.05034	7.61062	8.02212	7.24988	7.45963	GeneID:100155997,Genbank:XM_021098062.1	acylphosphatase 1				ko03430	Mismatch repair
ACYP2	493.404	0.109102	-0.401738	0.970076	-0.0438303	0.687877	0.942933	20.8855	19.5475	21.3286	18.7698	20.9333	20.8892	GeneID:100516794,Genbank:XM_021088229.1	acylphosphatase 2		GO:0003998	acylphosphatase activity	ko00627,ko00620	Aminobenzoate degradation|Pyruvate metabolism
ADA	108.372	0.278225	0.985265	1.20926	0.274125	0.324494	0.807112	4.05416	4.63775	2.50375	6.40343	3.75203	3.50691	GeneID:100625920,Genbank:XM_021077978.1	adenosine deaminase				ko00230	Purine metabolism
ADA2	268.06	0.195643	1.18359	1.1741	0.231561	0.236576	0.739594	7.41363	8.21178	4.14695	8.30515	7.87743	7.26098	GeneID:397079,Genbank:NM_214016.2	adenosine deaminase 2		GO:0004000,GO:0005615,GO:0006154,GO:0008083,GO:0008201,GO:0008270,GO:0031685,GO:0043103,GO:0043394,GO:0046103	adenosine deaminase activity|extracellular space|adenosine catabolic process|growth factor activity|heparin binding|zinc ion binding|adenosine receptor binding|hypoxanthine salvage|proteoglycan binding|inosine biosynthetic process	ko00230	Purine metabolism
ADAL	439.709	0.114846	-0.105896	0.991606	-0.0121618	0.915665	0.983356	2.60754	2.23365	2.32245	2.41915	2.35817	2.40538	GeneID:100155388,Genbank:XM_005659689.3	adenosine deaminase like		GO:0004000,GO:0005829,GO:0006154,GO:0009117,GO:0017144,GO:0043101,GO:0046103,GO:0046872	adenosine deaminase activity|cytosol|adenosine catabolic process|nucleotide metabolic process|drug metabolic process|purine-containing compound salvage|inosine biosynthetic process|metal ion binding
ADAM10	915.785	0.0861605	-2.1568	0.879142	-0.185831	0.0310209	0.321256	23.8488	25.9493	25.5145	22.4052	21.5338	22.9869	GeneID:397345,Genbank:NM_001130531.1	ADAM metallopeptidase domain 10		GO:0000139,GO:0001701,GO:0004175,GO:0004222,GO:0005615,GO:0005634,GO:0005737,GO:0005794,GO:0005798,GO:0006468,GO:0006509,GO:0007162,GO:0007219,GO:0008237,GO:0008284,GO:0009986,GO:0010820,GO:0014069,GO:0016021,GO:0016485,GO:0017124,GO:0019901,GO:0030307,GO:0034612,GO:0042117,GO:0042803,GO:0046872,GO:0051088,GO:0051089,GO:0097038,GO:0097197	Golgi membrane|in utero embryonic development|endopeptidase activity|metalloendopeptidase activity|extracellular space|nucleus|cytoplasm|Golgi apparatus|Golgi-associated vesicle|protein phosphorylation|membrane protein ectodomain proteolysis|negative regulation of cell adhesion|Notch signaling pathway|metallopeptidase activity|positive regulation of cell proliferation|cell surface|positive regula…
ADAM11	1343.66	0.0766176	-2.03314	0.897651	-0.155774	0.0420386	0.376057	15.1937	16.4168	15.48	14.7732	13.8662	14.0888	GeneID:100525073,Genbank:XM_021066856.1	ADAM metallopeptidase domain 11		GO:0004222,GO:0005178,GO:0005886,GO:0007229,GO:0008237,GO:0016021	metalloendopeptidase activity|integrin binding|plasma membrane|integrin-mediated signaling pathway|metallopeptidase activity|integral component of membrane
ADAM12	98.8765	0.230628	1.15748	1.20326	0.266946	0.247078	0.748331	0.383698	0.45436	0.473968	0.583823	0.444509	0.566287	GeneID:100157228,Genbank:XM_021072593.1	ADAM metallopeptidase domain 12
ADAM15	811.803	0.107933	0.0586782	1.0044	0.00633331	0.953208	0.990309	11.7043	10.275	9.47088	9.34159	10.6504	11.9425	GeneID:100153483,Genbank:XM_001929336.5	ADAM metallopeptidase domain 15		GO:0001525,GO:0001669,GO:0001953,GO:0002418,GO:0004222,GO:0005178,GO:0005886,GO:0005912,GO:0007160,GO:0007229,GO:0008237,GO:0008584,GO:0009986,GO:0016021,GO:0017124,GO:0022617,GO:0030198,GO:0030308,GO:0030336,GO:0030574,GO:0042246,GO:0042995,GO:0045087,GO:0046872,GO:0060317,GO:0070062,GO:0070528,GO:1900121	angiogenesis|acrosomal vesicle|negative regulation of cell-matrix adhesion|immune response to tumor cell|metalloendopeptidase activity|integrin binding|plasma membrane|adherens junction|cell-matrix adhesion|integrin-mediated signaling pathway|metallopeptidase activity|male gonad development|cell surface|integral component of membrane|SH3 domain binding|extracellular matrix disassembly|extracellul…
ADAM17	393.432	0.121967	3.09411	1.29898	0.37738	0.00197405	0.0659509	3.93395	4.60599	4.24522	5.27308	5.63984	5.87205	GeneID:397343,Genbank:XM_021085854.1	ADAM metallopeptidase domain 17				ko04330	Notch signaling pathway
ADAM19	778.252	0.104156	-1.9156	0.870839	-0.199522	0.0554157	0.430277	6.1766	7.24038	7.39332	6.65212	5.7785	5.88923	GeneID:100521528,Genbank:XM_013984891.2	ADAM metallopeptidase domain 19		GO:0004222,GO:0005794,GO:0005886,GO:0006509,GO:0007507,GO:0016021,GO:0017124,GO:0030198,GO:0046872	metalloendopeptidase activity|Golgi apparatus|plasma membrane|membrane protein ectodomain proteolysis|heart development|integral component of membrane|SH3 domain binding|extracellular matrix organization|metal ion binding
ADAM22	3714.85	0.0698763	-0.898617	0.957409	-0.062792	0.368857	0.837138	18.4253	19.031	17.201	18.3703	16.055	18.4654	GeneID:100513676,Genbank:XM_021063337.1	ADAM metallopeptidase domain 22		GO:0004222,GO:0005178,GO:0005886,GO:0007155,GO:0007162,GO:0007417,GO:0008344,GO:0016021,GO:0022011,GO:0030424	metalloendopeptidase activity|integrin binding|plasma membrane|cell adhesion|negative regulation of cell adhesion|central nervous system development|adult locomotory behavior|integral component of membrane|myelination in peripheral nervous system|axon
ADAM23	3576.79	0.0692312	-2.33937	0.893812	-0.161957	0.0193164	0.251042	33.279	29.9527	28.5057	27.8013	26.1382	28.9386	GeneID:100518044,Genbank:XM_021076147.1	ADAM metallopeptidase domain 23
ADAM28	85.5792	0.262566	0.0831162	1.01524	0.0218234	0.933759	0.987001	2.20858	1.95646	1.36435	1.54633	2.25548	1.87553	GeneID:100152711,Genbank:XM_005670435.3	ADAM metallopeptidase domain 28		GO:0004222,GO:0005576,GO:0005739,GO:0005886,GO:0007283,GO:0008237,GO:0016021,GO:0046872	metalloendopeptidase activity|extracellular region|mitochondrion|plasma membrane|spermatogenesis|metallopeptidase activity|integral component of membrane|metal ion binding
ADAM33	152.732	0.183822	1.15946	1.1592	0.213135	0.246268	0.747771	2.25714	1.99162	2.14655	2.52114	2.22155	2.74957	GeneID:100738366,Genbank:XM_021077387.1	ADAM metallopeptidase domain 33
ADAM3A	10.9825	0.721757	1.37925	1.99375	0.995485	0.167817	0.666617	0.0499007	0.319478	0.204223	0.37571	0.275603	0.499094	GeneID:100048948,Genbank:NM_001097513.1	ADAM metallopeptidase domain 3A (cyritestin 1)		GO:0004222,GO:0007275,GO:0007283,GO:0016021,GO:0030154	metalloendopeptidase activity|multicellular organism development|spermatogenesis|integral component of membrane|cell differentiation
ADAM5	1.31764	2.05994	-1.30335	0.15552	-2.68482	0.192455	0.69167	0.092649	0.148291	0.0947936	0	0	0.0463326	GeneID:100525189,Genbank:XM_021074731.1	a disintegrin and metallopeptidase domain 5		GO:0004222,GO:0016021	metalloendopeptidase activity|integral component of membrane
ADAM8	3.87595	1.26152	1.81745	4.89989	2.29275	0.0691476	0.472081	0.0119856	0	0.0367892	0.116025	0.0794363	0.0479509	GeneID:100156146,Genbank:XM_021073932.1	ADAM metallopeptidase domain 8		GO:0000902,GO:0001525,GO:0002102,GO:0002523,GO:0002675,GO:0004222,GO:0004252,GO:0005509,GO:0005737,GO:0005886,GO:0005887,GO:0006954,GO:0008237,GO:0008270,GO:0009986,GO:0010954,GO:0022407,GO:0022617,GO:0032010,GO:0032127,GO:0033089,GO:0035579,GO:0042581,GO:0043312,GO:0043406,GO:0043524,GO:0043621,GO:0045089,GO:0045780,GO:0045785,GO:0048247,GO:0050714,GO:0050839,GO:0051044,GO:0051092,GO:0051897,GO:…	cell morphogenesis|angiogenesis|podosome|leukocyte migration involved in inflammatory response|positive regulation of acute inflammatory response|metalloendopeptidase activity|serine-type endopeptidase activity|calcium ion binding|cytoplasm|plasma membrane|integral component of plasma membrane|inflammatory response|metallopeptidase activity|zinc ion binding|cell surface|positive regulation of pro…
ADAM9	697.22	0.105069	-0.47992	0.965652	-0.0504247	0.631284	0.934417	11.1853	9.25739	9.45635	8.91068	10.3284	9.95926	GeneID:397344,Genbank:XM_001925664.5	ADAM metallopeptidase domain 9
ADAMTS1	99.36	0.268659	-0.704368	0.877071	-0.189235	0.481203	0.893842	1.12344	2.14593	1.31973	1.47689	1.07243	1.51205	GeneID:497061,Genbank:NM_001144843.1	ADAM metallopeptidase with thrombospondin type 1 motif 1		GO:0001542,GO:0001822,GO:0004222,GO:0005578,GO:0005604,GO:0008201,GO:0008270,GO:0016525,GO:0031410,GO:0060347	ovulation from ovarian follicle|kidney development|metalloendopeptidase activity|proteinaceous extracellular matrix|basement membrane|heparin binding|zinc ion binding|negative regulation of angiogenesis|cytoplasmic vesicle|heart trabecula formation
ADAMTS10	181.196	0.170514	2.08623	1.27963	0.355731	0.0369575	0.350285	2.83911	3.02946	2.47512	3.32476	3.80413	3.66292	GeneID:100624519,Genbank:NM_001246250.1	ADAM metallopeptidase with thrombospondin type 1 motif 10		GO:0001527,GO:0004222,GO:0005578,GO:0031012,GO:0046872	microfibril|metalloendopeptidase activity|proteinaceous extracellular matrix|extracellular matrix|metal ion binding
ADAMTS12	19.0919	0.504054	2.07048	2.06141	1.04363	0.0384079	0.357705	0.0976967	0.0651542	0.0749686	0.151055	0.161874	0.183213	GeneID:100511353,Genbank:XM_021076980.1	ADAM metallopeptidase with thrombospondin type 1 motif 12		GO:0004222,GO:0005578,GO:0007160,GO:0016477,GO:0030167,GO:0031012,GO:0032331,GO:0046872,GO:0050727,GO:0051603,GO:0071347,GO:0071356,GO:0071773,GO:1901509,GO:1902203,GO:1902548,GO:2001113	metalloendopeptidase activity|proteinaceous extracellular matrix|cell-matrix adhesion|cell migration|proteoglycan catabolic process|extracellular matrix|negative regulation of chondrocyte differentiation|metal ion binding|regulation of inflammatory response|proteolysis involved in cellular protein catabolic process|cellular response to interleukin-1|cellular response to tumor necrosis factor|cell…
ADAMTS13	21.4132	0.491668	-0.0444421	0.984968	-0.0218507	0.964552	0.993605	0.119448	0.245109	0.253827	0.227307	0.223288	0.165419	GeneID:100627950,Genbank:XM_013987089.2	ADAM metallopeptidase with thrombospondin type 1 motif 13
ADAMTS14	86.6425	0.245948	1.10282	1.20684	0.271237	0.270104	0.767373	0.631946	0.666564	0.483072	0.671903	0.826426	0.675646	GeneID:100153539,Genbank:XM_013990433.2	ADAM metallopeptidase with thrombospondin type 1 motif 14		GO:0004222,GO:0005576,GO:0005578,GO:0030199,GO:0030574,GO:0046872	metalloendopeptidase activity|extracellular region|proteinaceous extracellular matrix|collagen fibril organization|collagen catabolic process|metal ion binding
ADAMTS15	108.728	0.218295	1.29024	1.21559	0.281652	0.196968	0.697055	1.06699	0.953904	0.924495	1.09595	1.4122	1.11525	GeneID:100518325,Genbank:XM_003130081.4	ADAM metallopeptidase with thrombospondin type 1 motif 15		GO:0004222,GO:0005578,GO:0005615,GO:0008201,GO:0008270,GO:0009986,GO:0050840	metalloendopeptidase activity|proteinaceous extracellular matrix|extracellular space|heparin binding|zinc ion binding|cell surface|extracellular matrix binding
ADAMTS16	18.6824	0.557113	-0.143854	0.945964	-0.0801429	0.885616	0.980832	0.102124	0.193726	0.383122	0.231892	0.225613	0.192934	GeneID:100519115,Genbank:XM_021076731.1	ADAM metallopeptidase with thrombospondin type 1 motif 16		GO:0001658,GO:0003073,GO:0004222,GO:0005578,GO:0046872,GO:0048232,GO:1902017	branching involved in ureteric bud morphogenesis|regulation of systemic arterial blood pressure|metalloendopeptidase activity|proteinaceous extracellular matrix|metal ion binding|male gamete generation|regulation of cilium assembly
ADAMTS17	152.816	0.178054	1.20814	1.1608	0.215115	0.226992	0.727797	1.21348	1.26748	1.29403	1.44309	1.49145	1.49575	GeneID:102160867,Genbank:XM_013993230.2	ADAM metallopeptidase with thrombospondin type 1 motif 17		GO:0003676,GO:0004222,GO:0005578,GO:0046872	nucleic acid binding|metalloendopeptidase activity|proteinaceous extracellular matrix|metal ion binding
ADAMTS18	22.0711	0.552624	0.181229	1.07189	0.100151	0.856188	0.977976	0.187836	0.0738422	0.394482	0.297735	0.207484	0.207644	GeneID:102167408,Genbank:XM_021093765.1	ADAM metallopeptidase with thrombospondin type 1 motif 18		GO:0001654,GO:0004222,GO:0005578,GO:0046872,GO:0090331	eye development|metalloendopeptidase activity|proteinaceous extracellular matrix|metal ion binding|negative regulation of platelet aggregation
ADAMTS19	123.512	0.208315	1.36669	1.21816	0.284701	0.171722	0.672437	1.20752	0.880616	0.93327	1.1493	1.31464	1.25986	GeneID:100518181,Genbank:XM_021084737.1	ADAM metallopeptidase with thrombospondin type 1 motif 19		GO:0004222,GO:0005578,GO:0046872	metalloendopeptidase activity|proteinaceous extracellular matrix|metal ion binding
ADAMTS2	64.4889	0.28145	1.96356	1.46677	0.552644	0.049581	0.410119	0.492082	0.364164	0.438508	0.717089	0.657527	0.547735	GeneID:100521434,Genbank:XM_021084334.1	ADAM metallopeptidase with thrombospondin type 1 motif 2		GO:0004222,GO:0005578,GO:0005615,GO:0007283,GO:0008270,GO:0016485,GO:0030199,GO:0030324,GO:0030574,GO:0032964,GO:0043588,GO:0097435	metalloendopeptidase activity|proteinaceous extracellular matrix|extracellular space|spermatogenesis|zinc ion binding|protein processing|collagen fibril organization|lung development|collagen catabolic process|collagen biosynthetic process|skin development|supramolecular fiber organization
ADAMTS20	196.271	0.16072	1.79021	1.22071	0.287722	0.0734198	0.481423	1.16509	1.27893	1.25371	1.48363	1.45708	1.62069	GeneID:100049661,Genbank:XM_021090846.1	ADAM metallopeptidase with thrombospondin type 1 motif 20		GO:0004175,GO:0004222,GO:0005578,GO:0005615,GO:0006508,GO:0008270,GO:0009967,GO:0030198,GO:0043066,GO:0045636,GO:0048070	endopeptidase activity|metalloendopeptidase activity|proteinaceous extracellular matrix|extracellular space|proteolysis|zinc ion binding|positive regulation of signal transduction|extracellular matrix organization|negative regulation of apoptotic process|positive regulation of melanocyte differentiation|regulation of developmental pigmentation
ADAMTS3	365.7	0.137015	0.696391	1.06837	0.0954162	0.486184	0.895453	3.44768	2.79628	3.36714	3.90494	3.32747	3.15221	GeneID:100524818,Genbank:XM_021101423.1	ADAM metallopeptidase with thrombospondin type 1 motif 3		GO:0004175,GO:0004222,GO:0005576,GO:0005578,GO:0005615,GO:0008201,GO:0008270,GO:0010573,GO:0016485,GO:0030199,GO:0030574,GO:0032964,GO:0070062,GO:0097435,GO:1900748	endopeptidase activity|metalloendopeptidase activity|extracellular region|proteinaceous extracellular matrix|extracellular space|heparin binding|zinc ion binding|vascular endothelial growth factor production|protein processing|collagen fibril organization|collagen catabolic process|collagen biosynthetic process|extracellular exosome|supramolecular fiber organization|positive regulation of vascula…
ADAMTS4	540.153	0.133833	2.27165	1.23458	0.304021	0.0231077	0.278276	7.74214	6.46327	7.71328	9.38979	10.5897	7.39481	GeneID:100157276,Genbank:XM_003481414.4	ADAM metallopeptidase with thrombospondin type 1 motif 4		GO:0004222,GO:0005578,GO:0008237,GO:0046872	metalloendopeptidase activity|proteinaceous extracellular matrix|metallopeptidase activity|metal ion binding
ADAMTS5	42.7689	0.354773	0.459461	1.11962	0.163004	0.645903	0.937018	0.224438	0.286214	0.179226	0.329722	0.247915	0.202577	GeneID:100522952,Genbank:XM_021070866.1	ADAM metallopeptidase with thrombospondin type 1 motif 5		GO:0004222,GO:0005178,GO:0005576,GO:0005578,GO:0005615,GO:0005788,GO:0006508,GO:0008201,GO:0008237,GO:0008270,GO:0022617,GO:0036066,GO:0042742,GO:0044691,GO:0050840	metalloendopeptidase activity|integrin binding|extracellular region|proteinaceous extracellular matrix|extracellular space|endoplasmic reticulum lumen|proteolysis|heparin binding|metallopeptidase activity|zinc ion binding|extracellular matrix disassembly|protein O-linked fucosylation|defense response to bacterium|tooth eruption|extracellular matrix binding
ADAMTS6	128.233	0.208993	3.87674	1.75347	0.810211	0.000105865	0.0101714	0.947302	0.863787	0.696083	1.28753	1.49349	1.66237	GeneID:100513765,Genbank:XM_021076778.1	ADAM metallopeptidase with thrombospondin type 1 motif 6		GO:0004222,GO:0005578,GO:0008237,GO:0046872	metalloendopeptidase activity|proteinaceous extracellular matrix|metallopeptidase activity|metal ion binding
ADAMTS7	26.7175	0.477822	0.508567	1.18345	0.243004	0.611056	0.931086	0.128813	0.0506391	0.0797702	0.0583368	0.123565	0.128835	GeneID:100154398,Genbank:XM_021098839.1	ADAM metallopeptidase with thrombospondin type 1 motif 7		GO:0004222,GO:0005578,GO:0005615,GO:0005788,GO:0008237,GO:0009986,GO:0032331,GO:0036066,GO:0046872,GO:0051603,GO:0071347,GO:0071356,GO:0071773	metalloendopeptidase activity|proteinaceous extracellular matrix|extracellular space|endoplasmic reticulum lumen|metallopeptidase activity|cell surface|negative regulation of chondrocyte differentiation|protein O-linked fucosylation|metal ion binding|proteolysis involved in cellular protein catabolic process|cellular response to interleukin-1|cellular response to tumor necrosis factor|cellular re…
ADAMTS8	351.806	0.142748	2.49458	1.27996	0.356097	0.0126106	0.201183	2.24219	3.12382	2.78754	3.39456	3.81323	3.34272	GeneID:100518855,Genbank:XM_003130083.4	ADAM metallopeptidase with thrombospondin type 1 motif 8		GO:0004222,GO:0005178,GO:0005578,GO:0008201,GO:0008237,GO:0008270,GO:0008285,GO:0009673	metalloendopeptidase activity|integrin binding|proteinaceous extracellular matrix|heparin binding|metallopeptidase activity|zinc ion binding|negative regulation of cell proliferation|low-affinity phosphate transmembrane transporter activity
ADAMTS9	76.4731	0.258502	0.705632	1.13478	0.182408	0.480417	0.893701	0.356843	0.416464	0.473492	0.431794	0.548142	0.451708	GeneID:100520218,Genbank:XM_003132298.6	ADAM metallopeptidase with thrombospondin type 1 motif 9		GO:0003179,GO:0003229,GO:0004222,GO:0005578,GO:0005615,GO:0005783,GO:0006508,GO:0006516,GO:0007275,GO:0008237,GO:0008270,GO:0009986,GO:0010596,GO:0015031,GO:0016192,GO:0030198,GO:0035909,GO:0043231,GO:0045636,GO:0090673,GO:1903671	heart valve morphogenesis|ventricular cardiac muscle tissue development|metalloendopeptidase activity|proteinaceous extracellular matrix|extracellular space|endoplasmic reticulum|proteolysis|glycoprotein catabolic process|multicellular organism development|metallopeptidase activity|zinc ion binding|cell surface|negative regulation of endothelial cell migration|protein transport|vesicle-mediated t…
ADAMTSL1	260.733	0.148702	0.465347	1.04913	0.0691979	0.641683	0.935432	1.58516	1.302	1.4435	1.56436	1.37189	1.65626	GeneID:102160697,Genbank:XM_021074260.1	ADAMTS like 1		GO:0005578,GO:0005788,GO:0008233,GO:0036066	proteinaceous extracellular matrix|endoplasmic reticulum lumen|peptidase activity|protein O-linked fucosylation
ADAMTSL2	285.578	0.144209	-0.508971	0.950397	-0.073398	0.610772	0.931086	5.28342	4.1515	4.41441	4.11962	4.48157	4.70897	GeneID:100628047,Genbank:XM_013987096.2	ADAMTS like 2		GO:0005578,GO:0008233,GO:0030198,GO:0030512,GO:0050436,GO:0060481	proteinaceous extracellular matrix|peptidase activity|extracellular matrix organization|negative regulation of transforming growth factor beta receptor signaling pathway|microfibril binding|lobar bronchus epithelium development
ADAMTSL3	338.26	0.163298	1.07194	1.129	0.175046	0.283747	0.776702	2.83732	2.31195	2.17159	2.73473	2.17353	3.44224	GeneID:100157238,Genbank:XM_021098873.1	ADAMTS like 3		GO:0005578,GO:0008233,GO:0043231	proteinaceous extracellular matrix|peptidase activity|intracellular membrane-bounded organelle
ADAMTSL4	14.7852	0.57695	-0.569168	0.796429	-0.328382	0.569242	0.92259	0.262038	0.226348	0.153202	0.120791	0.234315	0.162242	GeneID:100514576,Genbank:XM_005663500.3	ADAMTS like 4		GO:0002020,GO:0002064,GO:0005614,GO:0005615,GO:0005788,GO:0006915,GO:0008233,GO:0030198,GO:0036066,GO:0043065	protease binding|epithelial cell development|interstitial matrix|extracellular space|endoplasmic reticulum lumen|apoptotic process|peptidase activity|extracellular matrix organization|protein O-linked fucosylation|positive regulation of apoptotic process
ADAMTSL5	34.9968	0.386401	1.10638	1.34491	0.427508	0.268561	0.765813	0.494523	0.311195	0.376234	0.66829	0.406187	0.532656	GeneID:100512586,Genbank:XM_021084234.1	ADAMTS like 5		GO:0001527,GO:0005576,GO:0005578,GO:0008201	microfibril|extracellular region|proteinaceous extracellular matrix|heparin binding
ADAP1	2678.46	0.0604103	0.877987	1.03745	0.0530395	0.379951	0.843609	100.532	96.5293	100.302	103.301	105.287	103.338	GeneID:397453,Genbank:NM_214226.1	ArfGAP with dual PH domains 1		GO:0005096,GO:0005547,GO:0005634,GO:0005737,GO:0005829,GO:0005886,GO:0007166,GO:0043087,GO:0043533,GO:0046872	GTPase activator activity|phosphatidylinositol-3,4,5-trisphosphate binding|nucleus|cytoplasm|cytosol|plasma membrane|cell surface receptor signaling pathway|regulation of GTPase activity|inositol 1,3,4,5 tetrakisphosphate binding|metal ion binding
ADAP2	218.654	0.171604	1.19753	1.15309	0.205501	0.231101	0.734425	2.10387	1.57493	1.49345	2.12257	2.09875	1.81062	GeneID:100337675,Genbank:XM_021066061.1	ArfGAP with dual PH domains 2		GO:0005096,GO:0005546,GO:0005547,GO:0005737,GO:0005740,GO:0005886,GO:0007507,GO:0030674,GO:0043325,GO:0043533,GO:0046872	GTPase activator activity|phosphatidylinositol-4,5-bisphosphate binding|phosphatidylinositol-3,4,5-trisphosphate binding|cytoplasm|mitochondrial envelope|plasma membrane|heart development|protein binding, bridging|phosphatidylinositol-3,4-bisphosphate binding|inositol 1,3,4,5 tetrakisphosphate binding|metal ion binding
ADAR	1824.61	0.0679441	-0.888574	0.959016	-0.0603733	0.374232	0.839832	17.208	17.9117	17.083	16.3278	16.7484	17.534	GeneID:100523784,Genbank:XM_021089756.1	adenosine deaminase, RNA specific		GO:0001649,GO:0001701,GO:0002244,GO:0002566,GO:0003677,GO:0003723,GO:0003726,GO:0005634,GO:0005654,GO:0005730,GO:0005737,GO:0006382,GO:0006397,GO:0006606,GO:0006611,GO:0009615,GO:0016020,GO:0016553,GO:0030218,GO:0031054,GO:0035280,GO:0035455,GO:0043066,GO:0044387,GO:0044530,GO:0045070,GO:0045071,GO:0045087,GO:0046872,GO:0051607,GO:0060216,GO:0060337,GO:0060339,GO:0061484,GO:0098586,GO:1900369	osteoblast differentiation|in utero embryonic development|hematopoietic progenitor cell differentiation|somatic diversification of immune receptors via somatic mutation|DNA binding|RNA binding|double-stranded RNA adenosine deaminase activity|nucleus|nucleoplasm|nucleolus|cytoplasm|adenosine to inosine editing|mRNA processing|protein import into nucleus|protein export from nucleus|response to viru…	ko04623	Cytosolic DNA-sensing pathway
ADARB1	1921.64	0.0676125	1.58465	1.07709	0.107142	0.113047	0.572367	18.9771	18.2551	18.1513	20.0405	20.8351	19.4405	GeneID:100154277,Genbank:XM_021071524.1	adenosine deaminase, RNA specific B1		GO:0003723,GO:0003725,GO:0003726,GO:0003729,GO:0005634,GO:0005654,GO:0005730,GO:0005829,GO:0006382,GO:0006396,GO:0006397,GO:0007274,GO:0008285,GO:0016553,GO:0021610,GO:0021618,GO:0021965,GO:0030336,GO:0035264,GO:0044387,GO:0045070,GO:0045087,GO:0046872,GO:0050884,GO:0051607,GO:0051726,GO:0060384,GO:0060415,GO:0061744,GO:0097049	RNA binding|double-stranded RNA binding|double-stranded RNA adenosine deaminase activity|mRNA binding|nucleus|nucleoplasm|nucleolus|cytosol|adenosine to inosine editing|RNA processing|mRNA processing|neuromuscular synaptic transmission|negative regulation of cell proliferation|base conversion or substitution editing|facial nerve morphogenesis|hypoglossal nerve morphogenesis|spinal cord ventral co…
ADARB2	356.84	0.128064	1.43642	1.13599	0.183953	0.150884	0.638868	2.6827	2.31586	2.42444	2.90845	3.00261	2.61911	GeneID:100521919,Genbank:XM_021065069.1	adenosine deaminase, RNA specific B2 (inactive)		GO:0003723,GO:0003725,GO:0003727,GO:0004000,GO:0005634,GO:0006397,GO:0046872	RNA binding|double-stranded RNA binding|single-stranded RNA binding|adenosine deaminase activity|nucleus|mRNA processing|metal ion binding
ADAT1	52.9781	0.304543	-0.0121418	0.99744	-0.00369771	0.990312	0.998367	0.824686	0.730828	0.757967	0.811854	0.895511	0.629107	GeneID:100521793,Genbank:XM_003126858.4	adenosine deaminase, tRNA specific 1		GO:0003723,GO:0008033,GO:0008251,GO:0046872	RNA binding|tRNA processing|tRNA-specific adenosine deaminase activity|metal ion binding
ADAT2	88.4458	0.25076	0.417704	1.0753	0.104743	0.676163	0.939399	0.430533	0.55398	0.699615	0.612897	0.636422	0.582588	GeneID:100154785,Genbank:XM_001924236.5	adenosine deaminase, tRNA specific 2		GO:0002100,GO:0005654,GO:0006400,GO:0008270,GO:0052717,GO:0052718	tRNA wobble adenosine to inosine editing|nucleoplasm|tRNA modification|zinc ion binding|tRNA-specific adenosine-34 deaminase activity|tRNA-specific adenosine-34 deaminase complex
ADAT3	11.3187	0.663207	0.579611	1.30532	0.384402	0.562177	0.920462	0.611713	0.285567	0.273819	0.575709	0.591238	0.382387	GeneID:102159223,Genbank:XM_021084211.1	adenosine deaminase, tRNA specific 3		GO:0003824,GO:0005654,GO:0006400,GO:0009451,GO:0046872	catalytic activity|nucleoplasm|tRNA modification|RNA modification|metal ion binding
ADCK1	234.004	0.156586	-0.397523	0.957772	-0.0622463	0.690982	0.942933	1.38527	1.31126	1.47448	1.44793	1.14763	1.44138	GeneID:100154765,Genbank:XM_021099558.1	aarF domain containing kinase 1		GO:0004674,GO:0005524,GO:0005576,GO:0005739	protein serine/threonine kinase activity|ATP binding|extracellular region|mitochondrion
ADCK2	636.789	0.125392	-0.489684	0.958332	-0.0614025	0.624358	0.932543	10.5937	13.7681	12.8642	10.0343	12.7546	13.2903	GeneID:100514083,Genbank:XM_003134607.4	aarF domain containing kinase 2		GO:0004674,GO:0005524,GO:0016021	protein serine/threonine kinase activity|ATP binding|integral component of membrane
ADCK5	198.376	0.15827	0.322328	1.03599	0.0510147	0.747204	0.955641	4.53698	4.81671	4.5951	4.63347	4.885	5.0878	GeneID:100156475,Genbank:XM_005662812.3	aarF domain containing kinase 5		GO:0004674,GO:0016021	protein serine/threonine kinase activity|integral component of membrane
ADCY1	11538.4	0.0637496	-0.058638	0.997412	-0.00373815	0.95324	0.990309	55.6043	63.4251	59.9883	63.6556	58.0937	58.7555	GeneID:100624934,Genbank:XM_021078661.1	adenylate cyclase 1		GO:0004383,GO:0005516,GO:0005524,GO:0005737,GO:0005887,GO:0006171,GO:0006182,GO:0007189,GO:0008074,GO:0008294,GO:0019933,GO:0042752,GO:0045121,GO:0046872,GO:0048511,GO:0071277,GO:1904322	guanylate cyclase activity|calmodulin binding|ATP binding|cytoplasm|integral component of plasma membrane|cAMP biosynthetic process|cGMP biosynthetic process|adenylate cyclase-activating G-protein coupled receptor signaling pathway|guanylate cyclase complex, soluble|calcium- and calmodulin-responsive adenylate cyclase activity|cAMP-mediated signaling|regulation of circadian rhythm|membrane raft|m…	ko04540,ko04727,ko04015,ko04211,ko04913,ko04611,ko04914,ko04923,ko04916,ko04970,ko04261,ko04925,ko04911,ko04918,ko04713,ko04724,ko04976,ko04024,ko04725,ko04114,ko04723,ko04020,ko04912,ko04972,ko04022,ko04971,ko04062,ko04270,ko04750,ko04720,ko00230,ko04915,ko04072,ko04921,ko04213	Gap junction|GABAergic synapse|Rap1 signaling pathway|Longevity regulating pathway|Ovarian steroidogenesis|Platelet activation|Progesterone-mediated oocyte maturation|Regulation of lipolysis in adipocytes|Melanogenesis|Salivary secretion|Adrenergic signaling in cardiomyocytes|Aldosterone synthesis and secretion|Insulin secretion|Thyroid hormone synthesis|Circadian entrainment|Glutamatergic synaps…
ADCY10	2.50896	1.43187	0.445712	1.55639	0.638199	0.655805	0.937251	0.0143828	0	0.0294314	0.01547	0.0397181	0.0143853	GeneID:100157188,Genbank:XM_021088594.1	adenylate cyclase 10, soluble		GO:0000287,GO:0003351,GO:0004016,GO:0005524,GO:0005634,GO:0005856,GO:0005886,GO:0005929,GO:0006171,GO:0007283,GO:0035556,GO:0048471,GO:0071241,GO:0071890	magnesium ion binding|epithelial cilium movement|adenylate cyclase activity|ATP binding|nucleus|cytoskeleton|plasma membrane|cilium|cAMP biosynthetic process|spermatogenesis|intracellular signal transduction|perinuclear region of cytoplasm|cellular response to inorganic substance|bicarbonate binding	ko00230,ko04024,ko04713	Purine metabolism|cAMP signaling pathway|Circadian entrainment
ADCY2	4374.3	0.065874	-0.0364293	0.998338	-0.00239974	0.97094	0.994862	47.2873	54.1371	48.7301	50.9208	48.4975	52.1283	GeneID:100517503,Genbank:XM_021077007.1	adenylate cyclase 2		GO:0000287,GO:0003091,GO:0004016,GO:0004383,GO:0005524,GO:0005622,GO:0005737,GO:0005886,GO:0005887,GO:0006171,GO:0006182,GO:0007165,GO:0007186,GO:0007188,GO:0007189,GO:0007190,GO:0007193,GO:0008074,GO:0008179,GO:0016020,GO:0019933,GO:0030145,GO:0030425,GO:0034199,GO:0045121,GO:0046982,GO:0071377,GO:1904322	magnesium ion binding|renal water homeostasis|adenylate cyclase activity|guanylate cyclase activity|ATP binding|intracellular|cytoplasm|plasma membrane|integral component of plasma membrane|cAMP biosynthetic process|cGMP biosynthetic process|signal transduction|G-protein coupled receptor signaling pathway|adenylate cyclase-modulating G-protein coupled receptor signaling pathway|adenylate cyclase-…	ko04540,ko04922,ko04727,ko04015,ko04211,ko04913,ko04611,ko04914,ko04923,ko04916,ko04970,ko04261,ko04925,ko04911,ko04918,ko04713,ko04724,ko04976,ko04024,ko04725,ko04114,ko04723,ko04020,ko04912,ko04972,ko04022,ko04971,ko04062,ko04270,ko04750,ko00230,ko04915,ko04072,ko04921,ko04213	Gap junction|Glucagon signaling pathway|GABAergic synapse|Rap1 signaling pathway|Longevity regulating pathway|Ovarian steroidogenesis|Platelet activation|Progesterone-mediated oocyte maturation|Regulation of lipolysis in adipocytes|Melanogenesis|Salivary secretion|Adrenergic signaling in cardiomyocytes|Aldosterone synthesis and secretion|Insulin secretion|Thyroid hormone synthesis|Circadian entra…
ADCY3	586.81	0.107693	0.897833	1.06932	0.0966905	0.369275	0.837363	6.40545	6.23657	6.46545	6.22853	6.6824	7.74397	GeneID:100514402,Genbank:XM_021087776.1	adenylate cyclase 3		GO:0003091,GO:0004016,GO:0004383,GO:0005516,GO:0005524,GO:0005737,GO:0005794,GO:0005886,GO:0005887,GO:0005929,GO:0006171,GO:0006182,GO:0007165,GO:0007186,GO:0007189,GO:0007190,GO:0007193,GO:0007338,GO:0007340,GO:0007608,GO:0008074,GO:0008355,GO:0016020,GO:0016021,GO:0030317,GO:0034199,GO:0046872,GO:0071377,GO:1904322	renal water homeostasis|adenylate cyclase activity|guanylate cyclase activity|calmodulin binding|ATP binding|cytoplasm|Golgi apparatus|plasma membrane|integral component of plasma membrane|cilium|cAMP biosynthetic process|cGMP biosynthetic process|signal transduction|G-protein coupled receptor signaling pathway|adenylate cyclase-activating G-protein coupled receptor signaling pathway|activation o…	ko04540,ko04727,ko04015,ko04211,ko04913,ko04611,ko04962,ko04914,ko04923,ko04916,ko04970,ko04261,ko04925,ko04911,ko04918,ko04713,ko04724,ko04976,ko04024,ko04725,ko04114,ko04723,ko04020,ko04912,ko04972,ko04022,ko04971,ko04062,ko04270,ko04750,ko04740,ko00230,ko04915,ko04072,ko04921,ko04213	Gap junction|GABAergic synapse|Rap1 signaling pathway|Longevity regulating pathway|Ovarian steroidogenesis|Platelet activation|Vasopressin-regulated water reabsorption|Progesterone-mediated oocyte maturation|Regulation of lipolysis in adipocytes|Melanogenesis|Salivary secretion|Adrenergic signaling in cardiomyocytes|Aldosterone synthesis and secretion|Insulin secretion|Thyroid hormone synthesis|C…
ADCY4	91.1904	0.230976	0.183425	1.0298	0.0423666	0.854465	0.977976	1.2671	1.16464	1.09106	1.17397	1.13635	1.35516	GeneID:100152067,Genbank:XM_001927556.7	adenylate cyclase 4		GO:0003091,GO:0004016,GO:0004383,GO:0005080,GO:0005524,GO:0005737,GO:0005886,GO:0006171,GO:0006182,GO:0007165,GO:0007186,GO:0007188,GO:0007189,GO:0007190,GO:0007193,GO:0008074,GO:0016020,GO:0016021,GO:0030425,GO:0034199,GO:0046872,GO:0071377	renal water homeostasis|adenylate cyclase activity|guanylate cyclase activity|protein kinase C binding|ATP binding|cytoplasm|plasma membrane|cAMP biosynthetic process|cGMP biosynthetic process|signal transduction|G-protein coupled receptor signaling pathway|adenylate cyclase-modulating G-protein coupled receptor signaling pathway|adenylate cyclase-activating G-protein coupled receptor signaling p…	ko04540,ko04727,ko04015,ko04211,ko04913,ko04611,ko04914,ko04923,ko04916,ko04970,ko04261,ko04925,ko04911,ko04918,ko04713,ko04724,ko04976,ko04024,ko04725,ko04114,ko04723,ko04020,ko04912,ko04742,ko04022,ko04971,ko04062,ko04270,ko04750,ko04972,ko00230,ko04915,ko04072,ko04921,ko04213	Gap junction|GABAergic synapse|Rap1 signaling pathway|Longevity regulating pathway|Ovarian steroidogenesis|Platelet activation|Progesterone-mediated oocyte maturation|Regulation of lipolysis in adipocytes|Melanogenesis|Salivary secretion|Adrenergic signaling in cardiomyocytes|Aldosterone synthesis and secretion|Insulin secretion|Thyroid hormone synthesis|Circadian entrainment|Glutamatergic synaps…
ADCY5	1880.97	0.098778	2.62261	1.1967	0.259056	0.00872598	0.162995	20.4083	20.2671	21.3552	22.9862	21.877	30.2119	GeneID:100155970,Genbank:XM_021070244.1	adenylate cyclase 5		GO:0001973,GO:0003091,GO:0004016,GO:0004383,GO:0005524,GO:0005886,GO:0005929,GO:0006171,GO:0006182,GO:0007186,GO:0007189,GO:0007190,GO:0007191,GO:0007193,GO:0007195,GO:0007204,GO:0007626,GO:0008074,GO:0008179,GO:0016021,GO:0034199,GO:0045111,GO:0046872,GO:0046982,GO:0050885,GO:0061178,GO:0071377,GO:0097110,GO:1904322	adenosine receptor signaling pathway|renal water homeostasis|adenylate cyclase activity|guanylate cyclase activity|ATP binding|plasma membrane|cilium|cAMP biosynthetic process|cGMP biosynthetic process|G-protein coupled receptor signaling pathway|adenylate cyclase-activating G-protein coupled receptor signaling pathway|activation of adenylate cyclase activity|adenylate cyclase-activating dopamine…	ko04924,ko04540,ko04727,ko04015,ko04211,ko04913,ko04611,ko04914,ko04923,ko04916,ko04728,ko04970,ko04261,ko04925,ko04911,ko04918,ko04713,ko04724,ko04976,ko04024,ko04725,ko04114,ko04723,ko04270,ko04072,ko04912,ko04972,ko04022,ko04971,ko04062,ko04726,ko04750,ko00230,ko04915,ko04921,ko04213	Renin secretion|Gap junction|GABAergic synapse|Rap1 signaling pathway|Longevity regulating pathway|Ovarian steroidogenesis|Platelet activation|Progesterone-mediated oocyte maturation|Regulation of lipolysis in adipocytes|Melanogenesis|Dopaminergic synapse|Salivary secretion|Adrenergic signaling in cardiomyocytes|Aldosterone synthesis and secretion|Insulin secretion|Thyroid hormone synthesis|Circa…
ADCY6	808.031	0.10901	0.646259	1.05004	0.0704484	0.518111	0.908294	7.0459	8.40744	7.34161	9.16193	7.28178	7.74165	GeneID:100522613,Genbank:XM_021091586.1	adenylate cyclase 6		GO:0003091,GO:0004016,GO:0004383,GO:0005080,GO:0005524,GO:0005886,GO:0005929,GO:0006171,GO:0006182,GO:0007186,GO:0007189,GO:0007190,GO:0007193,GO:0007212,GO:0008074,GO:0010977,GO:0016020,GO:0016021,GO:0019901,GO:0031226,GO:0034199,GO:0035811,GO:0046872,GO:0071377,GO:0071380,GO:0071870,GO:0097746,GO:1904117,GO:1904322	renal water homeostasis|adenylate cyclase activity|guanylate cyclase activity|protein kinase C binding|ATP binding|plasma membrane|cilium|cAMP biosynthetic process|cGMP biosynthetic process|G-protein coupled receptor signaling pathway|adenylate cyclase-activating G-protein coupled receptor signaling pathway|activation of adenylate cyclase activity|adenylate cyclase-inhibiting G-protein coupled re…	ko04924,ko04540,ko04727,ko04015,ko04211,ko04913,ko04611,ko04962,ko04914,ko04923,ko04916,ko04970,ko04261,ko04925,ko04911,ko04918,ko04713,ko04724,ko04976,ko04024,ko04725,ko04114,ko04723,ko04072,ko04912,ko04742,ko04022,ko04971,ko04062,ko04270,ko04750,ko04972,ko00230,ko04961,ko04915,ko04921,ko04213	Renin secretion|Gap junction|GABAergic synapse|Rap1 signaling pathway|Longevity regulating pathway|Ovarian steroidogenesis|Platelet activation|Vasopressin-regulated water reabsorption|Progesterone-mediated oocyte maturation|Regulation of lipolysis in adipocytes|Melanogenesis|Salivary secretion|Adrenergic signaling in cardiomyocytes|Aldosterone synthesis and secretion|Insulin secretion|Thyroid hor…
ADCY7	389.591	0.130383	1.52167	1.14743	0.1984	0.128091	0.598566	3.46349	3.53824	2.84203	3.51056	3.69154	4.21074	GeneID:100620994,Genbank:XM_021094204.1	adenylate cyclase 7		GO:0003091,GO:0004016,GO:0004383,GO:0005524,GO:0005886,GO:0006171,GO:0006182,GO:0007165,GO:0007186,GO:0007189,GO:0007190,GO:0007193,GO:0008074,GO:0016021,GO:0034199,GO:0046872,GO:0060135,GO:0071361,GO:0071377	renal water homeostasis|adenylate cyclase activity|guanylate cyclase activity|ATP binding|plasma membrane|cAMP biosynthetic process|cGMP biosynthetic process|signal transduction|G-protein coupled receptor signaling pathway|adenylate cyclase-activating G-protein coupled receptor signaling pathway|activation of adenylate cyclase activity|adenylate cyclase-inhibiting G-protein coupled receptor signa…	ko04540,ko04727,ko04015,ko04211,ko04913,ko04611,ko04914,ko04923,ko04916,ko04970,ko04261,ko04925,ko04911,ko04918,ko04713,ko04724,ko04976,ko04024,ko04725,ko04114,ko04723,ko04020,ko04912,ko04972,ko04022,ko04971,ko04062,ko04270,ko04750,ko00230,ko04915,ko04072,ko04921,ko04213	Gap junction|GABAergic synapse|Rap1 signaling pathway|Longevity regulating pathway|Ovarian steroidogenesis|Platelet activation|Progesterone-mediated oocyte maturation|Regulation of lipolysis in adipocytes|Melanogenesis|Salivary secretion|Adrenergic signaling in cardiomyocytes|Aldosterone synthesis and secretion|Insulin secretion|Thyroid hormone synthesis|Circadian entrainment|Glutamatergic synaps…
ADCY8	502.825	0.105896	-0.254343	0.981504	-0.026934	0.799231	0.967285	6.29889	5.90915	6.34885	6.24612	5.97489	6.19459	GeneID:100622999,Genbank:XM_021088905.1	adenylate cyclase 8		GO:0003091,GO:0004016,GO:0004383,GO:0005524,GO:0005886,GO:0006182,GO:0007165,GO:0007186,GO:0007189,GO:0007190,GO:0007193,GO:0007611,GO:0007616,GO:0008074,GO:0008294,GO:0016020,GO:0016021,GO:0034199,GO:0046872,GO:0071377	renal water homeostasis|adenylate cyclase activity|guanylate cyclase activity|ATP binding|plasma membrane|cGMP biosynthetic process|signal transduction|G-protein coupled receptor signaling pathway|adenylate cyclase-activating G-protein coupled receptor signaling pathway|activation of adenylate cyclase activity|adenylate cyclase-inhibiting G-protein coupled receptor signaling pathway|learning or m…	ko04540,ko04727,ko04015,ko04211,ko04913,ko04611,ko04914,ko04923,ko04916,ko04970,ko04261,ko04925,ko04911,ko04918,ko04713,ko04724,ko04976,ko04024,ko04725,ko04114,ko04723,ko04020,ko04912,ko04742,ko04022,ko04971,ko04062,ko04270,ko04750,ko04972,ko04720,ko00230,ko04915,ko04072,ko04921,ko04213	Gap junction|GABAergic synapse|Rap1 signaling pathway|Longevity regulating pathway|Ovarian steroidogenesis|Platelet activation|Progesterone-mediated oocyte maturation|Regulation of lipolysis in adipocytes|Melanogenesis|Salivary secretion|Adrenergic signaling in cardiomyocytes|Aldosterone synthesis and secretion|Insulin secretion|Thyroid hormone synthesis|Circadian entrainment|Glutamatergic synaps…
ADCY9	569.931	0.10656	0.50526	1.03802	0.0538406	0.613376	0.931086	3.49723	3.41258	3.75303	3.70251	3.43831	4.04724	GeneID:100625423,Genbank:XM_021086710.1	adenylate cyclase 9		GO:0003091,GO:0004016,GO:0004383,GO:0005524,GO:0005886,GO:0005887,GO:0006171,GO:0006182,GO:0007165,GO:0007186,GO:0007189,GO:0007190,GO:0007193,GO:0008074,GO:0016021,GO:0030424,GO:0030425,GO:0034199,GO:0046872,GO:0071377,GO:0071880	renal water homeostasis|adenylate cyclase activity|guanylate cyclase activity|ATP binding|plasma membrane|integral component of plasma membrane|cAMP biosynthetic process|cGMP biosynthetic process|signal transduction|G-protein coupled receptor signaling pathway|adenylate cyclase-activating G-protein coupled receptor signaling pathway|activation of adenylate cyclase activity|adenylate cyclase-inhib…	ko04540,ko04727,ko04015,ko04211,ko04913,ko04611,ko04962,ko04914,ko04923,ko04916,ko04970,ko04261,ko04925,ko04911,ko04918,ko04713,ko04724,ko04976,ko04024,ko04725,ko04114,ko04723,ko04020,ko04912,ko04972,ko04022,ko04971,ko04062,ko04270,ko04750,ko00230,ko04961,ko04915,ko04072,ko04921,ko04213	Gap junction|GABAergic synapse|Rap1 signaling pathway|Longevity regulating pathway|Ovarian steroidogenesis|Platelet activation|Vasopressin-regulated water reabsorption|Progesterone-mediated oocyte maturation|Regulation of lipolysis in adipocytes|Melanogenesis|Salivary secretion|Adrenergic signaling in cardiomyocytes|Aldosterone synthesis and secretion|Insulin secretion|Thyroid hormone synthesis|C…
ADCYAP1	523.646	0.123365	-3.91438	0.715538	-0.482899	9.06e-05	0.0092034	7.91698	8.56911	10.6016	6.34454	6.57847	6.68156	GeneID:414283,Genbank:XM_005665307.3	adenylate cyclase activating polypeptide 1		GO:0005184,GO:0005576,GO:0005622,GO:0007189,GO:0007204,GO:0007218,GO:0008277,GO:0010628,GO:0016521,GO:0019933,GO:0030073,GO:0031175,GO:0032880,GO:0043547,GO:0045860,GO:0045944,GO:0051428,GO:0060124,GO:0070374	neuropeptide hormone activity|extracellular region|intracellular|adenylate cyclase-activating G-protein coupled receptor signaling pathway|positive regulation of cytosolic calcium ion concentration|neuropeptide signaling pathway|regulation of G-protein coupled receptor protein signaling pathway|positive regulation of gene expression|pituitary adenylate cyclase activating polypeptide activity|cAMP…	ko04911,ko04924	Insulin secretion|Renin secretion
ADCYAP1R1	4688.86	0.0670396	1.38564	1.06651	0.0928928	0.165857	0.663848	37.3856	38.0895	39.0698	40.7768	44.6447	38.0955	GeneID:100511793,Genbank:XM_021078469.1	ADCYAP receptor type I		GO:0000139,GO:0001634,GO:0004999,GO:0005737,GO:0005768,GO:0005791,GO:0005901,GO:0005923,GO:0007166,GO:0007202,GO:0007283,GO:0008179,GO:0009986,GO:0010524,GO:0016021,GO:0019933,GO:0030154,GO:0030306,GO:0032355,GO:0033555,GO:0042493,GO:0042923,GO:0043005,GO:0043235,GO:0043950,GO:0045471,GO:0046545,GO:0051057,GO:0060548,GO:0060732	Golgi membrane|pituitary adenylate cyclase-activating polypeptide receptor activity|vasoactive intestinal polypeptide receptor activity|cytoplasm|endosome|rough endoplasmic reticulum|caveola|bicellular tight junction|cell surface receptor signaling pathway|activation of phospholipase C activity|spermatogenesis|adenylate cyclase binding|cell surface|positive regulation of calcium ion transport int…	ko04080,ko04024,ko04713,ko04911,ko04924	Neuroactive ligand-receptor interaction|cAMP signaling pathway|Circadian entrainment|Insulin secretion|Renin secretion
ADD1	8695.32	0.0561857	0.410435	1.01611	0.0230606	0.681487	0.941337	127.066	127.973	127.753	132.682	136.825	123.705	GeneID:100517353,Genbank:XM_013978492.2	adducin 1		GO:0000902,GO:0001701,GO:0003723,GO:0005198,GO:0005516,GO:0005634,GO:0005737,GO:0005856,GO:0005886,GO:0005913,GO:0005925,GO:0006811,GO:0006884,GO:0007010,GO:0008134,GO:0008290,GO:0014069,GO:0016020,GO:0020027,GO:0030218,GO:0030425,GO:0030507,GO:0030837,GO:0032092,GO:0035264,GO:0042608,GO:0042803,GO:0043197,GO:0045202,GO:0045296,GO:0045766,GO:0045807,GO:0046982,GO:0048471,GO:0048873,GO:0051015,GO:…	cell morphogenesis|in utero embryonic development|RNA binding|structural molecule activity|calmodulin binding|nucleus|cytoplasm|cytoskeleton|plasma membrane|cell-cell adherens junction|focal adhesion|ion transport|cell volume homeostasis|cytoskeleton organization|transcription factor binding|F-actin capping protein complex|postsynaptic density|membrane|hemoglobin metabolic process|erythrocyte dif…
ADD2	5759.65	0.0542982	-2.07803	0.92477	-0.112833	0.0377067	0.354614	23.7566	23.2109	23.0532	22.442	21.0156	21.9999	GeneID:100624449,Genbank:XM_021087396.1	adducin 2		GO:0003779,GO:0005198,GO:0005516,GO:0005829,GO:0006461,GO:0008290,GO:0014069,GO:0019901,GO:0030036,GO:0030097,GO:0030507,GO:0031410,GO:0032092,GO:0042803,GO:0044853,GO:0046982,GO:0050900,GO:0050901,GO:0051015,GO:0051016,GO:0051017,GO:0055085	actin binding|structural molecule activity|calmodulin binding|cytosol|protein complex assembly|F-actin capping protein complex|postsynaptic density|protein kinase binding|actin cytoskeleton organization|hemopoiesis|spectrin binding|cytoplasmic vesicle|positive regulation of protein binding|protein homodimerization activity|plasma membrane raft|protein heterodimerization activity|leukocyte migrati…
ADD3	3625.73	0.0662771	3.92405	1.19754	0.260074	8.71e-05	0.00908909	30.8371	32.7084	31.1841	34.9476	39.596	40.1733	GeneID:100155574,Genbank:XM_001924738.5	adducin 3
ADGB	40.0335	0.371484	1.29789	1.39682	0.482146	0.194324	0.692535	0.402589	0.240565	0.197715	0.363738	0.364654	0.459031	GeneID:100155164,Genbank:XM_021072116.1	androglobin		GO:0004198,GO:0005737,GO:0006508	calcium-dependent cysteine-type endopeptidase activity|cytoplasm|proteolysis
ADGRA1	549.349	0.112255	-0.0829519	0.993566	-0.00931174	0.93389	0.987001	8.96326	7.86287	7.90681	7.3542	8.4411	9.05102	GeneID:100623440,Genbank:XM_021073912.1	adhesion G protein-coupled receptor A1		GO:0004930,GO:0007166,GO:0016021	G-protein coupled receptor activity|cell surface receptor signaling pathway|integral component of membrane
ADGRA2	377.981	0.131775	1.0569	1.10135	0.139273	0.290559	0.780868	3.9825	3.18958	3.16188	3.65041	4.14509	3.71642	GeneID:100524344,Genbank:XM_003133366.4	adhesion G protein-coupled receptor A2		GO:0002040,GO:0004930,GO:0005886,GO:0007166,GO:0007186,GO:0007417,GO:0009986,GO:0010595,GO:0016021,GO:0030175,GO:0043542,GO:0045765,GO:0050920,GO:0090210,GO:1900747	sprouting angiogenesis|G-protein coupled receptor activity|plasma membrane|cell surface receptor signaling pathway|G-protein coupled receptor signaling pathway|central nervous system development|cell surface|positive regulation of endothelial cell migration|integral component of membrane|filopodium|endothelial cell migration|regulation of angiogenesis|regulation of chemotaxis|regulation of establ…
ADGRA3	605.63	0.109335	5.09712	1.47151	0.557293	3.45e-07	0.000159874	4.65003	4.84925	5.16967	6.94027	8.13357	6.7605	GeneID:100516144,Genbank:XM_021101068.1	adhesion G protein-coupled receptor A3		GO:0004930,GO:0007166,GO:0007186,GO:0009897,GO:0016021	G-protein coupled receptor activity|cell surface receptor signaling pathway|G-protein coupled receptor signaling pathway|external side of plasma membrane|integral component of membrane
ADGRB1	4605.95	0.068364	1.32425	1.06476	0.0905307	0.185422	0.684286	49.9439	44.2458	41.4794	47.7725	50.061	48.1807	GeneID:110260204,Genbank:XM_021088791.1	adhesion G protein-coupled receptor B1		GO:0001530,GO:0001786,GO:0001891,GO:0004872,GO:0004930,GO:0005615,GO:0005886,GO:0005925,GO:0006910,GO:0006911,GO:0007166,GO:0007399,GO:0007517,GO:0010596,GO:0014069,GO:0016021,GO:0016525,GO:0030165,GO:0030425,GO:0031397,GO:0042177,GO:0043197,GO:0043277,GO:0043652,GO:0045087,GO:0045211,GO:0048167,GO:0048471,GO:0050829,GO:0051965,GO:1901741,GO:1903428	lipopolysaccharide binding|phosphatidylserine binding|phagocytic cup|receptor activity|G-protein coupled receptor activity|extracellular space|plasma membrane|focal adhesion|phagocytosis, recognition|phagocytosis, engulfment|cell surface receptor signaling pathway|nervous system development|muscle organ development|negative regulation of endothelial cell migration|postsynaptic density|integral co…	ko04115	p53 signaling pathway
ADGRB2	4552.11	0.0609554	-1.73555	0.929295	-0.105791	0.082643	0.507243	52.2747	47.541	51.9047	45.2755	48.5548	48.7419	GeneID:100520965,Genbank:XM_021095791.1	adhesion G protein-coupled receptor B2		GO:0004930,GO:0005813,GO:0005886,GO:0007166,GO:0007186,GO:0007422,GO:0016021,GO:0016525,GO:0033173,GO:0051965	G-protein coupled receptor activity|centrosome|plasma membrane|cell surface receptor signaling pathway|G-protein coupled receptor signaling pathway|peripheral nervous system development|integral component of membrane|negative regulation of angiogenesis|calcineurin-NFAT signaling cascade|positive regulation of synapse assembly
ADGRB3	2224.33	0.0680553	-1.69271	0.923255	-0.115198	0.0905099	0.529357	18.371	17.9458	19.213	17.3786	16.3869	18.0666	GeneID:100736796,Genbank:XM_021072848.1	adhesion G protein-coupled receptor B3		GO:0004930,GO:0005096,GO:0005886,GO:0007166,GO:0007186,GO:0007520,GO:0016021,GO:0016322,GO:0016525,GO:0043083,GO:0048814,GO:0051965,GO:0061743,GO:0098794,GO:0099558	G-protein coupled receptor activity|GTPase activator activity|plasma membrane|cell surface receptor signaling pathway|G-protein coupled receptor signaling pathway|myoblast fusion|integral component of membrane|neuron remodeling|negative regulation of angiogenesis|synaptic cleft|regulation of dendrite morphogenesis|positive regulation of synapse assembly|motor learning|postsynapse|maintenance of s…
ADGRD1	325.881	0.164475	0.224242	1.02589	0.0368821	0.822569	0.972	2.70747	3.08376	4.38866	3.6429	3.49473	3.42804	GeneID:100736874,Genbank:XM_021072216.1	adhesion G protein-coupled receptor D1		GO:0004930,GO:0005622,GO:0005886,GO:0007166,GO:0007186,GO:0007189,GO:0016021	G-protein coupled receptor activity|intracellular|plasma membrane|cell surface receptor signaling pathway|G-protein coupled receptor signaling pathway|adenylate cyclase-activating G-protein coupled receptor signaling pathway|integral component of membrane
ADGRE1	4.08191	1.20425	-0.667453	0.572846	-0.80378	0.504483	0.90445	0.0695846	0.00928124	0.0622959	0	0.0384317	0.043498	GeneID:100521889,Genbank:XM_021083974.1	adhesion G protein-coupled receptor E1		GO:0002250,GO:0004930,GO:0005509,GO:0005887,GO:0007155,GO:0007166,GO:0007186,GO:0009897	adaptive immune response|G-protein coupled receptor activity|calcium ion binding|integral component of plasma membrane|cell adhesion|cell surface receptor signaling pathway|G-protein coupled receptor signaling pathway|external side of plasma membrane
ADGRE3	1.82621	1.68338	-0.849216	0.371246	-1.42955	0.395761	0.851287	0.0146751	0.0626361	0.0450445	0	0.0162102	0.0293554	GeneID:100516246,Genbank:XM_021083689.1	adhesion G protein-coupled receptor E3		GO:0004930,GO:0005509,GO:0005576,GO:0005886,GO:0007166,GO:0007186,GO:0016021,GO:0030667,GO:0043312,GO:0101003	G-protein coupled receptor activity|calcium ion binding|extracellular region|plasma membrane|cell surface receptor signaling pathway|G-protein coupled receptor signaling pathway|integral component of membrane|secretory granule membrane|neutrophil degranulation|ficolin-1-rich granule membrane
ADGRE5	397.297	0.137534	-4.266	0.665855	-0.586721	1.99e-05	0.00304548	7.94349	8.3639	6.06863	4.9584	5.34094	4.76092	GeneID:396964,Genbank:NM_213925.2	adhesion G protein-coupled receptor E5		GO:0004930,GO:0005509,GO:0005886,GO:0007155,GO:0007166,GO:0016021	G-protein coupled receptor activity|calcium ion binding|plasma membrane|cell adhesion|cell surface receptor signaling pathway|integral component of membrane
ADGRF2	86.6407	0.244191	-1.63889	0.757753	-0.400201	0.101237	0.550848	1.09493	1.21507	1.06426	0.871494	0.701486	1.00751	GeneID:100621059,Genbank:XM_013996166.2	adhesion G protein-coupled receptor F2		GO:0004930,GO:0007166,GO:0007186,GO:0016021	G-protein coupled receptor activity|cell surface receptor signaling pathway|G-protein coupled receptor signaling pathway|integral component of membrane
ADGRF3	4.46956	1.00983	-0.513228	0.698207	-0.518274	0.607792	0.931086	0.0633137	0.0562988	0.0539827	0.0567497	0.0233122	0.0422165	GeneID:100512530,Genbank:XM_021087733.1	adhesion G protein-coupled receptor F3		GO:0004930,GO:0007166,GO:0007186,GO:0016021	G-protein coupled receptor activity|cell surface receptor signaling pathway|G-protein coupled receptor signaling pathway|integral component of membrane
ADGRF4	23.813	0.493997	-2.2341	0.46534	-1.10364	0.0254762	0.293107	0.5874	0.360875	0.855965	0.382911	0.235943	0.23144	GeneID:100620961,Genbank:XM_003354824.4	adhesion G protein-coupled receptor F4		GO:0004930,GO:0007166,GO:0007186,GO:0016021	G-protein coupled receptor activity|cell surface receptor signaling pathway|G-protein coupled receptor signaling pathway|integral component of membrane
ADGRF5	870.71	0.0930521	3.39354	1.24468	0.315776	0.000689959	0.0346818	7.95004	8.2991	8.32081	9.23813	10.9882	10.6999	GeneID:100152930,Genbank:XM_013978015.2	adhesion G protein-coupled receptor F5		GO:0004930,GO:0005886,GO:0006112,GO:0007166,GO:0007186,GO:0009986,GO:0016021,GO:0031410,GO:0042593,GO:0043031,GO:0043129,GO:0045177,GO:0045444,GO:0071073	G-protein coupled receptor activity|plasma membrane|energy reserve metabolic process|cell surface receptor signaling pathway|G-protein coupled receptor signaling pathway|cell surface|integral component of membrane|cytoplasmic vesicle|glucose homeostasis|negative regulation of macrophage activation|surfactant homeostasis|apical part of cell|fat cell differentiation|positive regulation of phospholi…
ADGRG1	2472.19	0.0911618	2.67196	1.18393	0.24358	0.00754102	0.148206	20.2234	16.411	17.4739	21.3653	24.1814	19.2091	GeneID:100515029,Genbank:XM_021093332.1	adhesion G protein-coupled receptor G1		GO:0001525,GO:0004930,GO:0005518,GO:0005576,GO:0005622,GO:0005886,GO:0007155,GO:0007166,GO:0007266,GO:0008201,GO:0008285,GO:0010573,GO:0016021,GO:0016477,GO:0021796,GO:0021801,GO:0021819,GO:0035025,GO:0045121,GO:0045785,GO:0050840,GO:0070528,GO:0072520,GO:0097451,GO:2000179,GO:2001223	angiogenesis|G-protein coupled receptor activity|collagen binding|extracellular region|intracellular|plasma membrane|cell adhesion|cell surface receptor signaling pathway|Rho protein signal transduction|heparin binding|negative regulation of cell proliferation|vascular endothelial growth factor production|integral component of membrane|cell migration|cerebral cortex regionalization|cerebral corte…
ADGRG2	53.0844	0.436959	1.16494	1.42309	0.509031	0.244043	0.745992	0.680687	0.726323	0.232148	0.411027	0.606787	1.33772	GeneID:100157214,Genbank:XM_021080654.1	adhesion G protein-coupled receptor G2		GO:0004930,GO:0005829,GO:0007166,GO:0009986,GO:0016021,GO:0016324,GO:0070062	G-protein coupled receptor activity|cytosol|cell surface receptor signaling pathway|cell surface|integral component of membrane|apical plasma membrane|extracellular exosome
ADGRG3	3.02748	1.40078	0.2745	1.30542	0.384514	0.7837	0.963105	0.0542336	0.0289348	0.0277445	0.13125	0.0149766	0	GeneID:100514842,Genbank:XM_021093918.1	adhesion G protein-coupled receptor G3		GO:0004930,GO:0005886,GO:0007166,GO:0007186,GO:0016021,GO:0030183,GO:0030334,GO:0032792,GO:0035579,GO:0043312,GO:1901223	G-protein coupled receptor activity|plasma membrane|cell surface receptor signaling pathway|G-protein coupled receptor signaling pathway|integral component of membrane|B cell differentiation|regulation of cell migration|negative regulation of CREB transcription factor activity|specific granule membrane|neutrophil degranulation|negative regulation of NIK/NF-kappaB signaling
ADGRG5	21.8449	0.491873	0.494028	1.18345	0.242999	0.621287	0.932107	0.357925	0.197546	0.214675	0.30533	0.408998	0.209855	GeneID:100621610,Genbank:XM_021093911.1	adhesion G protein-coupled receptor G5		GO:0004930,GO:0005886,GO:0007166,GO:0007186,GO:0016021	G-protein coupled receptor activity|plasma membrane|cell surface receptor signaling pathway|G-protein coupled receptor signaling pathway|integral component of membrane
ADGRG6	225.295	0.187312	-0.0143482	0.998139	-0.00268759	0.988552	0.997893	1.88073	1.12545	1.4692	1.71536	1.32648	1.47434	GeneID:100511292,Genbank:XM_021087195.1	adhesion G protein-coupled receptor G6		GO:0004930,GO:0005518,GO:0005622,GO:0005886,GO:0007005,GO:0007166,GO:0007186,GO:0007189,GO:0014037,GO:0016021,GO:0019933,GO:0022011,GO:0042552,GO:0043236,GO:0050840,GO:0060347	G-protein coupled receptor activity|collagen binding|intracellular|plasma membrane|mitochondrion organization|cell surface receptor signaling pathway|G-protein coupled receptor signaling pathway|adenylate cyclase-activating G-protein coupled receptor signaling pathway|Schwann cell differentiation|integral component of membrane|cAMP-mediated signaling|myelination in peripheral nervous system|myeli…
ADGRG7	25.7312	0.70846	3.47087	5.49826	2.45898	0.000518768	0.0281816	0.0543396	0.0797264	0.0347484	0.102283	0.0750296	0.760887	GeneID:102160124,Genbank:XM_021070565.1	adhesion G protein-coupled receptor G7		GO:0004930,GO:0007166,GO:0007186,GO:0016021	G-protein coupled receptor activity|cell surface receptor signaling pathway|G-protein coupled receptor signaling pathway|integral component of membrane
ADGRL1	4159.05	0.0594964	-1.39334	0.944159	-0.0828988	0.163517	0.660845	25.7534	24.0458	24.2354	23.0586	22.7933	24.816	GeneID:100514215,Genbank:XM_021083697.1	adhesion G protein-coupled receptor L1		GO:0004930,GO:0005622,GO:0005886,GO:0007157,GO:0007166,GO:0016021,GO:0016524,GO:0030054,GO:0030246,GO:0030424,GO:0030426,GO:0035584,GO:0042734,GO:0043005,GO:0045202,GO:0050839,GO:0090129	G-protein coupled receptor activity|intracellular|plasma membrane|heterophilic cell-cell adhesion via plasma membrane cell adhesion molecules|cell surface receptor signaling pathway|integral component of membrane|latrotoxin receptor activity|cell junction|carbohydrate binding|axon|growth cone|calcium-mediated signaling using intracellular calcium source|presynaptic membrane|neuron projection|syna…
ADGRL2	1201.64	0.0983897	-0.545429	0.963486	-0.0536646	0.585458	0.92735	6.39199	6.24899	6.86355	6.12346	5.53354	7.34212	GeneID:100524685,Genbank:XM_021096393.1	adhesion G protein-coupled receptor L2
ADGRL3	2273.35	0.064767	-1.65745	0.928293	-0.107348	0.0974282	0.541489	10.6221	10.34	10.9478	10.0732	10.1391	9.73971	GeneID:100624115,Genbank:XM_021100590.1	adhesion G protein-coupled receptor L3		GO:0001764,GO:0004930,GO:0005509,GO:0005887,GO:0005911,GO:0007166,GO:0007416,GO:0030246,GO:0030424,GO:0098742	neuron migration|G-protein coupled receptor activity|calcium ion binding|integral component of plasma membrane|cell-cell junction|cell surface receptor signaling pathway|synapse assembly|carbohydrate binding|axon|cell-cell adhesion via plasma-membrane adhesion molecules
ADGRL4	326.737	0.13212	-0.417972	0.962446	-0.0552225	0.675967	0.939399	3.51416	3.94712	3.22754	3.37087	3.55259	3.47366	GeneID:100525348,Genbank:XM_005665360.3	adhesion G protein-coupled receptor L4		GO:0004930,GO:0005509,GO:0005886,GO:0007166,GO:0007186,GO:0016021,GO:0031410,GO:0046983	G-protein coupled receptor activity|calcium ion binding|plasma membrane|cell surface receptor signaling pathway|G-protein coupled receptor signaling pathway|integral component of membrane|cytoplasmic vesicle|protein dimerization activity
ADGRV1	518.362	0.12228	-0.932008	0.924045	-0.113966	0.351332	0.828211	1.34797	1.54352	1.25814	1.21661	1.17593	1.4813	GeneID:100519889,Genbank:XM_021085372.1	adhesion G protein-coupled receptor V1		GO:0004930,GO:0005509,GO:0005737,GO:0005886,GO:0007166,GO:0007186,GO:0007399,GO:0007601,GO:0007605,GO:0009986,GO:0016020,GO:0016021,GO:0032420,GO:0043235,GO:0045202,GO:0045494,GO:0048496,GO:0050877,GO:0050953,GO:0070062,GO:0098609	G-protein coupled receptor activity|calcium ion binding|cytoplasm|plasma membrane|cell surface receptor signaling pathway|G-protein coupled receptor signaling pathway|nervous system development|visual perception|sensory perception of sound|cell surface|membrane|integral component of membrane|stereocilium|receptor complex|synapse|photoreceptor cell maintenance|maintenance of animal organ identity|…
ADH1C	3.67074	1.24658	1.43402	3.45245	1.78762	0.151565	0.640362	0.077154	0.0823267	0.0394699	0.0414931	0.38351	0.270086	GeneID:100512615,Genbank:NM_001243939.1	alcohol dehydrogenase 1C (class I), gamma polypeptide		GO:0004022,GO:0005737,GO:0008270	alcohol dehydrogenase (NAD) activity|cytoplasm|zinc ion binding	ko00982,ko00980,ko00071,ko00350,ko00830,ko00010	Drug metabolism - cytochrome P450|Metabolism of xenobiotics by cytochrome P450|Fatty acid degradation|Tyrosine metabolism|Retinol metabolism|Glycolysis / Gluconeogenesis
ADH4	302.837	0.15023	-0.0744784	0.992274	-0.0111889	0.94063	0.987739	5.66408	4.79526	5.63903	4.45062	6.2191	5.49546	GeneID:100513366,Genbank:NM_001315670.1	alcohol dehydrogenase 4 (class II), pi polypeptide				ko00982,ko00980,ko00071,ko00350,ko00830,ko00010	Drug metabolism - cytochrome P450|Metabolism of xenobiotics by cytochrome P450|Fatty acid degradation|Tyrosine metabolism|Retinol metabolism|Glycolysis / Gluconeogenesis
ADH5	1233.77	0.0914075	0.0987926	1.00628	0.00903039	0.921303	0.984366	53.536	42.7266	44.608	46.8551	49.8606	46.6138	GeneID:100513555,Genbank:NM_001244833.1	alcohol dehydrogenase 5 (class III), chi polypeptide		GO:0001523,GO:0003016,GO:0004022,GO:0005504,GO:0005739,GO:0006069,GO:0008270,GO:0018119,GO:0018467,GO:0032496,GO:0042803,GO:0045777,GO:0046294,GO:0051409,GO:0051775,GO:0051903	retinoid metabolic process|respiratory system process|alcohol dehydrogenase (NAD) activity|fatty acid binding|mitochondrion|ethanol oxidation|zinc ion binding|peptidyl-cysteine S-nitrosylation|formaldehyde dehydrogenase activity|response to lipopolysaccharide|protein homodimerization activity|positive regulation of blood pressure|formaldehyde catabolic process|response to nitrosative stress|respo…	ko00982,ko00980,ko00680,ko01220,ko00071,ko00626,ko00350,ko01200,ko00830,ko00625,ko00010	Drug metabolism - cytochrome P450|Metabolism of xenobiotics by cytochrome P450|Methane metabolism|Degradation of aromatic compounds|Fatty acid degradation|Naphthalene degradation|Tyrosine metabolism|Carbon metabolism|Retinol metabolism|Chloroalkane and chloroalkene degradation|Glycolysis / Gluconeogenesis
ADHFE1	228.857	0.159184	1.74202	1.21193	0.277301	0.0815056	0.505187	6.0371	5.67226	5.54823	8.07372	6.87515	6.19846	GeneID:100521620,Genbank:XM_003125603.4	alcohol dehydrogenase, iron containing 1		GO:0004022,GO:0005739,GO:0005829,GO:0015993,GO:0046872,GO:0047988	alcohol dehydrogenase (NAD) activity|mitochondrion|cytosol|molecular hydrogen transport|metal ion binding|hydroxyacid-oxoacid transhydrogenase activity
ADI1	910.143	0.0941616	1.81316	1.12563	0.17073	0.0698075	0.473172	42.8176	42.5553	45.4609	46.7911	55.2422	46.9362	GeneID:100626434,Genbank:NM_001243698.1	acireductone dioxygenase 1		GO:0005634,GO:0005737,GO:0005886,GO:0006555,GO:0010309,GO:0016491,GO:0019509,GO:0046872	nucleus|cytoplasm|plasma membrane|methionine metabolic process|acireductone dioxygenase [iron(II)-requiring] activity|oxidoreductase activity|L-methionine salvage from methylthioadenosine|metal ion binding	ko00270	Cysteine and methionine metabolism
ADIPOR1	1617.32	0.0721668	0.450124	1.02277	0.032484	0.652621	0.937251	44.8971	45.1601	41.1788	44.0242	44.8054	46.8494	GeneID:404695,Genbank:XM_005668010.3	adiponectin receptor 1				ko04920,ko04211,ko04152	Adipocytokine signaling pathway|Longevity regulating pathway|AMPK signaling pathway
ADIPOR2	1434.92	0.0831104	1.73934	1.10539	0.144557	0.081975	0.505756	19.8772	20.7924	20.9895	22.6108	25.189	21.1268	GeneID:404694,Genbank:XM_005664110.3	adiponectin receptor 2				ko04920,ko04211,ko04152	Adipocytokine signaling pathway|Longevity regulating pathway|AMPK signaling pathway
ADIRF	38.6041	0.495585	-1.96718	0.508774	-0.974903	0.0491629	0.409635	3.13372	4.65227	13.9402	2.19822	4.51502	4.49699	GeneID:100154721,Genbank:NM_001243503.1	adipogenesis regulatory factor
ADK	519.356	0.106909	-2.7283	0.81695	-0.291681	0.00636619	0.133792	5.31623	5.59534	5.26322	4.50044	4.14164	4.71025	GeneID:100154626,Genbank:XM_003359240.4	adenosine kinase		GO:0003723,GO:0004001,GO:0005524,GO:0005634,GO:0005654,GO:0005829,GO:0006169,GO:0006175,GO:0009156,GO:0043101,GO:0044209,GO:0046872	RNA binding|adenosine kinase activity|ATP binding|nucleus|nucleoplasm|cytosol|adenosine salvage|dATP biosynthetic process|ribonucleoside monophosphate biosynthetic process|purine-containing compound salvage|AMP salvage|metal ion binding	ko00230	Purine metabolism
ADM	20.1276	0.537413	0.0473754	1.0178	0.0254601	0.962214	0.993168	0.595734	1.31108	0.419047	0.76091	0.616921	1.00548	GeneID:397195,Genbank:NM_214107.1	adrenomedullin		GO:0001570,GO:0001843,GO:0002031,GO:0003073,GO:0005179,GO:0005615,GO:0005737,GO:0007189,GO:0007507,GO:0008284,GO:0010460,GO:0030816,GO:0031700,GO:0035809,GO:0043116,GO:0045766,GO:0045906,GO:0048589,GO:0060670,GO:0060712,GO:0097084,GO:0097647,GO:1990410,GO:2001214	vasculogenesis|neural tube closure|G-protein coupled receptor internalization|regulation of systemic arterial blood pressure|hormone activity|extracellular space|cytoplasm|adenylate cyclase-activating G-protein coupled receptor signaling pathway|heart development|positive regulation of cell proliferation|positive regulation of heart rate|positive regulation of cAMP metabolic process|adrenomedulli…	ko04270	Vascular smooth muscle contraction
ADM2	3.65933	1.11122	0.490768	1.45937	0.545349	0.623591	0.932543	0.388737	0.553067	0.265157	0.696871	0.4294	0.648008	GeneID:100517471,Genbank:NM_001206384.1	adrenomedullin 2		GO:0001525,GO:0005179,GO:0005576,GO:0005622,GO:0006468,GO:0007186,GO:0007189,GO:0007586,GO:0007631,GO:0010628,GO:0032403,GO:0045766,GO:0045776	angiogenesis|hormone activity|extracellular region|intracellular|protein phosphorylation|G-protein coupled receptor signaling pathway|adenylate cyclase-activating G-protein coupled receptor signaling pathway|digestion|feeding behavior|positive regulation of gene expression|protein complex binding|positive regulation of angiogenesis|negative regulation of blood pressure
ADM5	28.6853	0.435246	-0.331708	0.904772	-0.144375	0.74011	0.954711	3.06646	1.76187	2.57431	2.62169	1.38963	2.75243	GeneID:100101476,Genbank:NM_001099939.1	adrenomedullin 5 (putative)		GO:0003073,GO:0005179,GO:0005576,GO:0005622,GO:0007189,GO:0010460,GO:0035809	regulation of systemic arterial blood pressure|hormone activity|extracellular region|intracellular|adenylate cyclase-activating G-protein coupled receptor signaling pathway|positive regulation of heart rate|regulation of urine volume
ADNP	2236.09	0.0645178	-0.205942	0.990832	-0.0132869	0.836836	0.974411	12.2332	12.5057	12.768	12.3471	12.9045	12.3262	GeneID:100141411,Genbank:XM_013985467.2	activity dependent neuroprotector homeobox	Homeobox	GO:0003677,GO:0003682,GO:0005507,GO:0005615,GO:0005634,GO:0005737,GO:0006351,GO:0006355,GO:0007614,GO:0009743,GO:0010035,GO:0010629,GO:0010835,GO:0030424,GO:0030425,GO:0030828,GO:0031668,GO:0032091,GO:0032147,GO:0033484,GO:0042277,GO:0043025,GO:0043524,GO:0044849,GO:0045773,GO:0048487,GO:0050731,GO:0050805,GO:0051965	DNA binding|chromatin binding|copper ion binding|extracellular space|nucleus|cytoplasm|transcription, DNA-templated|regulation of transcription, DNA-templated|short-term memory|response to carbohydrate|response to inorganic substance|negative regulation of gene expression|regulation of protein ADP-ribosylation|axon|dendrite|positive regulation of cGMP biosynthetic process|cellular response to ext…
ADNP2	498.648	0.113228	0.165675	1.01309	0.0187591	0.868413	0.98042	5.21515	5.06739	4.74961	5.35868	4.56992	5.45889	GeneID:100522237,Genbank:XM_003122295.6	ADNP homeobox 2		GO:0003677,GO:0005634,GO:0006351,GO:0006355,GO:0030182,GO:0030307,GO:0034599,GO:0046872,GO:0060548,GO:0071300	DNA binding|nucleus|transcription, DNA-templated|regulation of transcription, DNA-templated|neuron differentiation|positive regulation of cell growth|cellular response to oxidative stress|metal ion binding|negative regulation of cell death|cellular response to retinoic acid
ADO	1238.5	0.0788484	0.0882186	1.00483	0.00695589	0.929703	0.986202	15.876	14.3505	15.0198	15.8149	14.7391	15.4097	GeneID:100153304,Genbank:XM_005671024.3	2-aminoethanethiol dioxygenase		GO:0000098,GO:0005739,GO:0005829,GO:0046872,GO:0047800,GO:0055114	sulfur amino acid catabolic process|mitochondrion|cytosol|metal ion binding|cysteamine dioxygenase activity|oxidation-reduction process	ko00430	Taurine and hypotaurine metabolism
ADORA1	2194	0.0765808	-0.528131	0.972355	-0.0404447	0.597409	0.930838	21.0634	21.1588	22.7179	21.8813	22.5851	19.384	GeneID:606743,Genbank:XM_013977657.2	adenosine A1 receptor		GO:0000186,GO:0001609,GO:0001659,GO:0001664,GO:0001666,GO:0001883,GO:0002087,GO:0002674,GO:0002686,GO:0002793,GO:0003093,GO:0004629,GO:0005783,GO:0005886,GO:0005887,GO:0006612,GO:0006909,GO:0006954,GO:0007165,GO:0007186,GO:0007193,GO:0007267,GO:0007399,GO:0008285,GO:0014050,GO:0014069,GO:0016042,GO:0016323,GO:0030673,GO:0031072,GO:0031683,GO:0032229,GO:0032244,GO:0032795,GO:0032900,GO:0035307,GO:…	activation of MAPKK activity|G-protein coupled adenosine receptor activity|temperature homeostasis|G-protein coupled receptor binding|response to hypoxia|purine nucleoside binding|regulation of respiratory gaseous exchange by neurological system process|negative regulation of acute inflammatory response|negative regulation of leukocyte migration|positive regulation of peptide secretion|regulation…	ko04024,ko04923,ko04924,ko04080,ko04071,ko04022	cAMP signaling pathway|Regulation of lipolysis in adipocytes|Renin secretion|Neuroactive ligand-receptor interaction|Sphingolipid signaling pathway|cGMP-PKG signaling pathway
ADORA2A	103.31	1.05807	2.48973	6.20876	2.63431	0.0127842	0.203334	0.183092	0.601129	0.475529	0.636241	0.995661	6.3248	GeneID:503661,Genbank:XM_003483462.4	adenosine A2a receptor		GO:0001609,GO:0001963,GO:0001975,GO:0005622,GO:0005887,GO:0007189,GO:0007626,GO:0019899,GO:0032230,GO:0042755,GO:0042802,GO:0046636,GO:0050728,GO:0060080,GO:0098794,GO:2001235	G-protein coupled adenosine receptor activity|synaptic transmission, dopaminergic|response to amphetamine|intracellular|integral component of plasma membrane|adenylate cyclase-activating G-protein coupled receptor signaling pathway|locomotory behavior|enzyme binding|positive regulation of synaptic transmission, GABAergic|eating behavior|identical protein binding|negative regulation of alpha-beta …	ko04024,ko04015,ko04020,ko04080,ko04270	cAMP signaling pathway|Rap1 signaling pathway|Calcium signaling pathway|Neuroactive ligand-receptor interaction|Vascular smooth muscle contraction
ADORA2B	494.099	0.125503	2.17287	1.20807	0.272702	0.02979	0.314534	13.4687	13.9392	16.141	19.5505	18.2525	15.4044	GeneID:606745,Genbank:XM_021066285.1	adenosine A2b receptor		GO:0001609,GO:0002882,GO:0005622,GO:0005886,GO:0007189,GO:0010575,GO:0016021,GO:0031284,GO:0031668,GO:0032722,GO:0032755,GO:0043306,GO:0060087	G-protein coupled adenosine receptor activity|positive regulation of chronic inflammatory response to non-antigenic stimulus|intracellular|plasma membrane|adenylate cyclase-activating G-protein coupled receptor signaling pathway|positive regulation of vascular endothelial growth factor production|integral component of membrane|positive regulation of guanylate cyclase activity|cellular response to…	ko04015,ko04020,ko04270,ko04080	Rap1 signaling pathway|Calcium signaling pathway|Vascular smooth muscle contraction|Neuroactive ligand-receptor interaction
ADORA3	108.399	0.215528	1.90766	1.32975	0.411153	0.0564358	0.435544	2.84193	3.33238	2.90771	4.23243	3.62216	4.34173	GeneID:606753,Genbank:NM_001243435.2	adenosine A3 receptor		GO:0001609,GO:0005886,GO:0008285,GO:0016021,GO:0030336,GO:0032088	G-protein coupled adenosine receptor activity|plasma membrane|negative regulation of cell proliferation|integral component of membrane|negative regulation of cell migration|negative regulation of NF-kappaB transcription factor activity	ko04071,ko04022,ko04080	Sphingolipid signaling pathway|cGMP-PKG signaling pathway|Neuroactive ligand-receptor interaction
ADPGK	412.768	0.118247	-0.971168	0.923486	-0.114837	0.331465	0.812923	9.47597	9.78511	10.0081	8.24306	9.47835	9.60865	GeneID:100623786,Genbank:XM_021099100.1	ADP dependent glucokinase		GO:0005576,GO:0005783,GO:0006006,GO:0006096,GO:0043843,GO:0046872	extracellular region|endoplasmic reticulum|glucose metabolic process|glycolytic process|ADP-specific glucokinase activity|metal ion binding	ko01200,ko00010	Carbon metabolism|Glycolysis / Gluconeogenesis
ADPRH	236.802	0.176266	1.73683	1.2364	0.306146	0.0824163	0.506846	0.907431	0.766697	0.559132	0.87806	0.879386	1.03242	GeneID:100153158,Genbank:XM_021068217.1	ADP-ribosylarginine hydrolase		GO:0000287,GO:0003875,GO:0005622,GO:0006464,GO:0030955,GO:0051725	magnesium ion binding|ADP-ribosylarginine hydrolase activity|intracellular|cellular protein modification process|potassium ion binding|protein de-ADP-ribosylation
ADPRHL1	20.6749	0.567577	-2.58045	0.362334	-1.46461	0.00986714	0.17442	1.34169	0.425623	1.66955	0.312024	0.440605	0.507755	GeneID:100620837,Genbank:XM_003357909.5	ADP-ribosylhydrolase like 1		GO:0000287,GO:0003875,GO:0005096,GO:0005622,GO:0006886,GO:0012505,GO:0017137,GO:0031338,GO:0051725,GO:0090630	magnesium ion binding|ADP-ribosylarginine hydrolase activity|GTPase activator activity|intracellular|intracellular protein transport|endomembrane system|Rab GTPase binding|regulation of vesicle fusion|protein de-ADP-ribosylation|activation of GTPase activity
ADPRHL2	394.082	0.130817	-1.22445	0.894914	-0.160179	0.220782	0.724053	14.246	13.7838	15.0854	12.0369	15.186	11.8239	GeneID:100525405,Genbank:XM_003127788.4	ADP-ribosylhydrolase like 2		GO:0004649,GO:0005634,GO:0005759,GO:0046872	poly(ADP-ribose) glycohydrolase activity|nucleus|mitochondrial matrix|metal ion binding
ADPRM	239.144	0.149361	-1.33342	0.871057	-0.199161	0.182393	0.682969	1.28675	1.07311	1.14579	1.05337	1.03812	0.997077	GeneID:100519388,Genbank:XM_021066275.1	ADP-ribose/CDP-alcohol diphosphatase, manganese dependent		GO:0046872,GO:0047631,GO:0047734	metal ion binding|ADP-ribose diphosphatase activity|CDP-glycerol diphosphatase activity	ko00230,ko00564	Purine metabolism|Glycerophospholipid metabolism
ADRA1A	1036.42	0.0953662	-0.29603	0.980622	-0.0282313	0.767207	0.960758	2.9737	3.60728	3.64784	3.22542	3.49913	3.41879	GeneID:100144471,Genbank:XM_005657244.3	adrenoceptor alpha 1A		GO:0001994,GO:0004937,GO:0005634,GO:0005737,GO:0005886,GO:0005887,GO:0005901,GO:0007200,GO:0007204,GO:0007267,GO:0031965,GO:0043410,GO:0045907,GO:0045987,GO:0046982,GO:0055117,GO:0071880	norepinephrine-epinephrine vasoconstriction involved in regulation of systemic arterial blood pressure|alpha1-adrenergic receptor activity|nucleus|cytoplasm|plasma membrane|integral component of plasma membrane|caveola|phospholipase C-activating G-protein coupled receptor signaling pathway|positive regulation of cytosolic calcium ion concentration|cell-cell signaling|nuclear membrane|positive reg…	ko04970,ko04261,ko04020,ko04152,ko04080,ko04270,ko04022	Salivary secretion|Adrenergic signaling in cardiomyocytes|Calcium signaling pathway|AMPK signaling pathway|Neuroactive ligand-receptor interaction|Vascular smooth muscle contraction|cGMP-PKG signaling pathway
ADRA1B	189.983	0.173096	1.32875	1.17284	0.230002	0.183929	0.683458	2.81337	3.65302	2.79179	3.55468	3.87521	3.54275	GeneID:100519931,Genbank:XM_021076921.1	adrenoceptor alpha 1B		GO:0001994,GO:0004937,GO:0005634,GO:0005737,GO:0005886,GO:0005887,GO:0005901,GO:0007186,GO:0007188,GO:0007200,GO:0007204,GO:0007267,GO:0007275,GO:0008283,GO:0031965,GO:0035556,GO:0042593,GO:0043410,GO:0045907,GO:0045987,GO:0046982,GO:0055117,GO:0071880	norepinephrine-epinephrine vasoconstriction involved in regulation of systemic arterial blood pressure|alpha1-adrenergic receptor activity|nucleus|cytoplasm|plasma membrane|integral component of plasma membrane|caveola|G-protein coupled receptor signaling pathway|adenylate cyclase-modulating G-protein coupled receptor signaling pathway|phospholipase C-activating G-protein coupled receptor signali…	ko04970,ko04261,ko04020,ko04080,ko04270,ko04022	Salivary secretion|Adrenergic signaling in cardiomyocytes|Calcium signaling pathway|Neuroactive ligand-receptor interaction|Vascular smooth muscle contraction|cGMP-PKG signaling pathway
ADRA1D	112.715	0.2404	-2.09949	0.704799	-0.504717	0.0357737	0.34361	3.79683	5.19408	4.41595	2.19899	3.62045	3.73257	GeneID:552898,Genbank:NM_001123073.1	adrenoceptor alpha 1D		GO:0001994,GO:0004937,GO:0005622,GO:0005887,GO:0007200,GO:0007204,GO:0007267,GO:0045907,GO:0045987,GO:0071880	norepinephrine-epinephrine vasoconstriction involved in regulation of systemic arterial blood pressure|alpha1-adrenergic receptor activity|intracellular|integral component of plasma membrane|phospholipase C-activating G-protein coupled receptor signaling pathway|positive regulation of cytosolic calcium ion concentration|cell-cell signaling|positive regulation of vasoconstriction|positive regulati…	ko04970,ko04261,ko04020,ko04080,ko04270,ko04022	Salivary secretion|Adrenergic signaling in cardiomyocytes|Calcium signaling pathway|Neuroactive ligand-receptor interaction|Vascular smooth muscle contraction|cGMP-PKG signaling pathway
ADRA2A	101.962	0.22955	0.484583	1.08015	0.111236	0.627972	0.933404	4.60164	4.2087	3.78334	4.28661	3.903	5.54758	GeneID:399501,Genbank:NM_214400.1	adrenoceptor alpha 2A		GO:0001819,GO:0004938,GO:0005737,GO:0005887,GO:0006940,GO:0007193,GO:0007267,GO:0019229,GO:0019901,GO:0030168,GO:0030335,GO:0030818,GO:0031692,GO:0031696,GO:0031996,GO:0032148,GO:0032795,GO:0032870,GO:0035625,GO:0042593,GO:0042803,GO:0043235,GO:0043268,GO:0043406,GO:0046982,GO:0050995,GO:0051044,GO:0051379,GO:0051380,GO:0051926,GO:0061179,GO:0071878,GO:0071880,GO:0071881,GO:0071882,GO:0090303,GO:…	positive regulation of cytokine production|alpha2-adrenergic receptor activity|cytoplasm|integral component of plasma membrane|regulation of smooth muscle contraction|adenylate cyclase-inhibiting G-protein coupled receptor signaling pathway|cell-cell signaling|regulation of vasoconstriction|protein kinase binding|platelet activation|positive regulation of cell migration|negative regulation of cAM…	ko04080,ko04022	Neuroactive ligand-receptor interaction|cGMP-PKG signaling pathway
ADRA2B	12.3757	0.624221	0.295257	1.13627	0.184306	0.767798	0.960758	0.455991	0.619262	0.424132	0.802571	0.503689	0.414609	GeneID:641353,Genbank:NM_001037148.1	adrenoceptor alpha 2B				ko04080,ko04022	Neuroactive ligand-receptor interaction|cGMP-PKG signaling pathway
ADRA2C	170.81	0.199688	1.32997	1.20212	0.26558	0.183527	0.683318	4.66427	3.55084	4.9955	4.16604	6.23684	5.67449	GeneID:733706,Genbank:XM_005666516.3	adrenoceptor alpha 2C		GO:0004930,GO:0004938,GO:0005737,GO:0005887,GO:0007186,GO:0007267,GO:0007565,GO:0030168,GO:0030424,GO:0031694,GO:0032148,GO:0035625,GO:0042803,GO:0043410,GO:0043679,GO:0045666,GO:0045907,GO:0046982,GO:0051379,GO:0051930,GO:0070473,GO:0071875,GO:0071880	G-protein coupled receptor activity|alpha2-adrenergic receptor activity|cytoplasm|integral component of plasma membrane|G-protein coupled receptor signaling pathway|cell-cell signaling|female pregnancy|platelet activation|axon|alpha-2A adrenergic receptor binding|activation of protein kinase B activity|epidermal growth factor-activated receptor transactivation by G-protein coupled receptor signal…	ko04080,ko04022	Neuroactive ligand-receptor interaction|cGMP-PKG signaling pathway
ADRB1	89.8156	0.239562	-0.00654544	0.998914	-0.00156804	0.994778	0.998685	3.78481	3.57581	3.71107	4.02851	2.96134	4.17979	GeneID:397355,Genbank:NM_001123074.1	adrenoceptor beta 1		GO:0001659,GO:0001996,GO:0002025,GO:0004940,GO:0005057,GO:0005088,GO:0005769,GO:0005886,GO:0005887,GO:0007267,GO:0030819,GO:0043547,GO:0043950,GO:0051379,GO:0051380,GO:0071880	temperature homeostasis|positive regulation of heart rate by epinephrine-norepinephrine|norepinephrine-epinephrine-mediated vasodilation involved in regulation of systemic arterial blood pressure|beta1-adrenergic receptor activity|signal transducer activity, downstream of receptor|Ras guanyl-nucleotide exchange factor activity|early endosome|plasma membrane|integral component of plasma membrane|c…	ko04024,ko04923,ko04144,ko04924,ko04540,ko04970,ko04261,ko04020,ko04080,ko04022	cAMP signaling pathway|Regulation of lipolysis in adipocytes|Endocytosis|Renin secretion|Gap junction|Salivary secretion|Adrenergic signaling in cardiomyocytes|Calcium signaling pathway|Neuroactive ligand-receptor interaction|cGMP-PKG signaling pathway
ADRB2	48.9499	0.316803	0.636398	1.14998	0.201613	0.524517	0.90937	0.909946	1.10336	0.931008	1.15668	0.936598	1.32379	GeneID:397357,Genbank:XM_021081158.1	adrenoceptor beta 2		GO:0002025,GO:0002032,GO:0004941,GO:0005769,GO:0005887,GO:0006898,GO:0007190,GO:0007267,GO:0042803,GO:0043235,GO:0043410,GO:0045986,GO:0051379,GO:0051380,GO:0071880,GO:1901098,GO:1904504	norepinephrine-epinephrine-mediated vasodilation involved in regulation of systemic arterial blood pressure|desensitization of G-protein coupled receptor protein signaling pathway by arrestin|beta2-adrenergic receptor activity|early endosome|integral component of plasma membrane|receptor-mediated endocytosis|activation of adenylate cyclase activity|cell-cell signaling|protein homodimerization act…	ko04024,ko04923,ko04144,ko04924,ko04970,ko04261,ko04020,ko04080,ko04022	cAMP signaling pathway|Regulation of lipolysis in adipocytes|Endocytosis|Renin secretion|Salivary secretion|Adrenergic signaling in cardiomyocytes|Calcium signaling pathway|Neuroactive ligand-receptor interaction|cGMP-PKG signaling pathway
ADRM1	790.724	0.0902914	0.134832	1.00847	0.0121742	0.892744	0.98134	30.0579	29.4318	27.4974	28.7167	28.8272	31.1242	GeneID:110257483,Genbank:XM_021078220.1	adhesion regulating molecule 1		GO:0000502,GO:0001541,GO:0002020,GO:0005654,GO:0005829,GO:0005886,GO:0006368,GO:0006511,GO:0007286,GO:0008541,GO:0033081,GO:0042699,GO:0043130,GO:0043248,GO:0048477,GO:0048538,GO:0060009,GO:0060399,GO:0060612,GO:0061133,GO:0070628,GO:0072520	proteasome complex|ovarian follicle development|protease binding|nucleoplasm|cytosol|plasma membrane|transcription elongation from RNA polymerase II promoter|ubiquitin-dependent protein catabolic process|spermatid development|proteasome regulatory particle, lid subcomplex|regulation of T cell differentiation in thymus|follicle-stimulating hormone signaling pathway|ubiquitin binding|proteasome ass…
ADSL	352.705	0.124733	-0.561889	0.952581	-0.0700859	0.574192	0.923909	13.8124	14.8996	13.8619	14.0853	14.0484	12.8712	GeneID:100170844,Genbank:NM_001130733.1	adenylosuccinate lyase				ko00230,ko00250	Purine metabolism|Alanine, aspartate and glutamate metabolism
ADSS	486.916	0.109266	-0.98834	0.927878	-0.107992	0.322986	0.805444	12.1594	12.9747	13.0852	11.4894	11.612	12.743	GeneID:100048942,Genbank:NM_001097508.1	adenylosuccinate synthase		GO:0004019,GO:0005525,GO:0005737,GO:0005829,GO:0005886,GO:0044208,GO:0046040,GO:0046872	adenylosuccinate synthase activity|GTP binding|cytoplasm|cytosol|plasma membrane|'de novo' AMP biosynthetic process|IMP metabolic process|metal ion binding	ko00230,ko00250	Purine metabolism|Alanine, aspartate and glutamate metabolism
AEBP1	832.658	0.117868	1.87271	1.16533	0.220733	0.0611081	0.450508	13.132	9.92905	9.20459	13.5325	12.3105	12.1539	GeneID:733628,Genbank:XM_003134886.4	AE binding protein 1		GO:0000122,GO:0000977,GO:0001227,GO:0003714,GO:0004180,GO:0004181,GO:0004185,GO:0005516,GO:0005576,GO:0005615,GO:0006351,GO:0006355,GO:0006518,GO:0008270,GO:0016485,GO:0070062	negative regulation of transcription from RNA polymerase II promoter|RNA polymerase II regulatory region sequence-specific DNA binding|transcriptional repressor activity, RNA polymerase II transcription regulatory region sequence-specific DNA binding|transcription corepressor activity|carboxypeptidase activity|metallocarboxypeptidase activity|serine-type carboxypeptidase activity|calmodulin bindi…
AEBP2	387.681	0.127197	-0.0925708	0.991872	-0.0117747	0.926245	0.985134	4.61978	4.33049	5.2652	4.34001	4.98675	4.93643	GeneID:100522805,Genbank:XM_003126446.5	AE binding protein 2	zf-C2H2	GO:0000978,GO:0001078,GO:0003714,GO:0005634,GO:0005654,GO:0006351,GO:0016569,GO:0035098,GO:0045814,GO:0046872	RNA polymerase II proximal promoter sequence-specific DNA binding|transcriptional repressor activity, RNA polymerase II proximal promoter sequence-specific DNA binding|transcription corepressor activity|nucleus|nucleoplasm|transcription, DNA-templated|covalent chromatin modification|ESC/E(Z) complex|negative regulation of gene expression, epigenetic|metal ion binding
AEN	206.794	0.160025	-1.69334	0.828759	-0.270976	0.0903905	0.529347	4.44953	5.19098	4.32995	4.02014	3.82275	3.85693	GeneID:100522657,Genbank:XM_003121858.4	apoptosis enhancing nuclease		GO:0003676,GO:0004527,GO:0005634,GO:0005654,GO:0005730,GO:0010212,GO:0031965,GO:0042771	nucleic acid binding|exonuclease activity|nucleus|nucleoplasm|nucleolus|response to ionizing radiation|nuclear membrane|intrinsic apoptotic signaling pathway in response to DNA damage by p53 class mediator
AES	8532.86	0.0543486	-1.65419	0.939586	-0.0899027	0.0980895	0.544014	302.464	320.244	296.427	284.208	300.814	288.098	GeneID:110259367,Genbank:XM_021084158.1	amino-terminal enhancer of split		GO:0000122,GO:0001501,GO:0003714,GO:0005634,GO:0006351,GO:0007275,GO:0009887,GO:0010629,GO:0016055,GO:0031668,GO:0032091,GO:0040008,GO:0045892,GO:0060761,GO:0070555,GO:0090090,GO:2000210	negative regulation of transcription from RNA polymerase II promoter|skeletal system development|transcription corepressor activity|nucleus|transcription, DNA-templated|multicellular organism development|animal organ morphogenesis|negative regulation of gene expression|Wnt signaling pathway|cellular response to extracellular stimulus|negative regulation of protein binding|regulation of growth|neg…
AFAP1	304.684	0.140384	0.81315	1.08234	0.114154	0.416132	0.863152	7.8204	6.1575	6.38289	7.5009	7.70322	7.08638	GeneID:100522448,Genbank:NM_001253821.1	actin filament associated protein 1		GO:0003779,GO:0005829,GO:0005925,GO:0009966,GO:0015629,GO:0051493	actin binding|cytosol|focal adhesion|regulation of signal transduction|actin cytoskeleton|regulation of cytoskeleton organization
AFAP1L1	90.8637	0.23114	0.296525	1.04865	0.0685388	0.766829	0.960758	1.91903	1.95867	1.89943	1.88461	2.3041	1.94023	GeneID:100513463,Genbank:NM_001244817.1	actin filament associated protein 1 like 1		GO:0002102,GO:0005737,GO:0030054,GO:0071437	podosome|cytoplasm|cell junction|invadopodium
AFAP1L2	240.858	0.145816	0.0987373	1.01003	0.0143975	0.921347	0.984366	2.4426	2.4869	2.68657	2.66008	2.56319	2.55499	GeneID:100157959,Genbank:XM_013983751.2	actin filament associated protein 1 like 2		GO:0005829,GO:0005886,GO:0006954,GO:0007346,GO:0017124,GO:0030296,GO:0032675,GO:0032757,GO:0035591,GO:0042169,GO:0045742,GO:0045893	cytosol|plasma membrane|inflammatory response|regulation of mitotic cell cycle|SH3 domain binding|protein tyrosine kinase activator activity|regulation of interleukin-6 production|positive regulation of interleukin-8 production|signaling adaptor activity|SH2 domain binding|positive regulation of epidermal growth factor receptor signaling pathway|positive regulation of transcription, DNA-templated
AFDN	1704.56	0.071698	0.326423	1.01635	0.0234039	0.744104	0.955532	10.8678	10.6796	9.74916	10.4019	10.8722	10.8816	GeneID:100514741,Genbank:XM_021085839.1	afadin, adherens junction formation factor				ko04024,ko04520,ko04670,ko04015,ko04530,ko04014	cAMP signaling pathway|Adherens junction|Leukocyte transendothelial migration|Rap1 signaling pathway|Tight junction|Ras signaling pathway
AFF1	434.973	0.127561	-0.194522	0.982948	-0.0248134	0.845767	0.977201	1.75394	1.50261	1.67662	1.46816	1.88967	1.54892	GeneID:100739621,Genbank:XM_021101783.1	AF4/FMR2 family member 1	AF-4
AFF2	588.788	0.101369	-0.627403	0.956874	-0.0635995	0.530395	0.910486	1.70092	1.68937	1.87504	1.71195	1.69003	1.69281	GeneID:100512515,Genbank:XM_013984014.2	AF4/FMR2 family member 2		GO:0002151,GO:0006397,GO:0007420,GO:0007611,GO:0008380,GO:0010468,GO:0010629,GO:0016607,GO:0035063,GO:0043484	G-quadruplex RNA binding|mRNA processing|brain development|learning or memory|RNA splicing|regulation of gene expression|negative regulation of gene expression|nuclear speck|nuclear speck organization|regulation of RNA splicing
AFF3	1193.99	0.087789	-1.80091	0.896205	-0.1581	0.0717175	0.475981	4.68928	4.54986	5.18045	4.50349	3.98103	4.58009	GeneID:100522606,Genbank:XM_021088183.1	AF4/FMR2 family member 3	AF-4
AFF4	2202.97	0.0680832	0.178823	1.00847	0.0121749	0.858076	0.978442	13.0481	12.0713	13.4769	13.1254	12.8882	13.3433	GeneID:100524487,Genbank:XM_021084750.1	AF4/FMR2 family member 4	AF-4
AFG1L	202.975	0.165654	-1.69059	0.823561	-0.280053	0.0909156	0.530018	2.32885	2.26211	2.67124	1.84216	1.92645	2.27703	GeneID:100155926,Genbank:XM_021090788.1	AFG1 like ATPase		GO:0005524,GO:0005739,GO:0006123,GO:0007005,GO:0016787,GO:0031966,GO:0035694	ATP binding|mitochondrion|mitochondrial electron transport, cytochrome c to oxygen|mitochondrion organization|hydrolase activity|mitochondrial membrane|mitochondrial protein catabolic process
AFG3L2	2148.31	0.0677063	-1.19376	0.945517	-0.0808254	0.23257	0.736154	21.4999	22.5561	23.2557	21.5191	20.6873	22.1381	GeneID:100623478,Genbank:XM_021096024.1	AFG3 like matrix AAA peptidase subunit 2		GO:0004222,GO:0005524,GO:0005743,GO:0005745,GO:0006508,GO:0007409,GO:0007528,GO:0008053,GO:0008237,GO:0008270,GO:0016485,GO:0016540,GO:0021675,GO:0034982,GO:0036444,GO:0040014,GO:0042407,GO:0042552,GO:0048747,GO:0051560,GO:0060013	metalloendopeptidase activity|ATP binding|mitochondrial inner membrane|m-AAA complex|proteolysis|axonogenesis|neuromuscular junction development|mitochondrial fusion|metallopeptidase activity|zinc ion binding|protein processing|protein autoprocessing|nerve development|mitochondrial protein processing|mitochondrial calcium uptake|regulation of multicellular organism growth|cristae formation|myelin…
AFMID	234.213	0.175657	-1.00646	0.884668	-0.176792	0.314194	0.800401	4.3056	4.09079	3.06256	2.99751	3.12722	4.11463	GeneID:110255955,Genbank:XM_021066529.1	arylformamidase		GO:0004061,GO:0005634,GO:0005737,GO:0005829,GO:0016787,GO:0019441	arylformamidase activity|nucleus|cytoplasm|cytosol|hydrolase activity|tryptophan catabolic process to kynurenine	ko00630,ko00380	Glyoxylate and dicarboxylate metabolism|Tryptophan metabolism
AFTPH	1358.68	0.0782038	-2.02024	0.896272	-0.157991	0.043358	0.382862	14.4907	15.8163	14.7026	14.0501	12.8629	13.8595	GeneID:100518778,Genbank:XM_021087452.1	aftiphilin		GO:0005634,GO:0005794,GO:0005829,GO:0015031,GO:0030121,GO:0030276,GO:0043231	nucleus|Golgi apparatus|cytosol|protein transport|AP-1 adaptor complex|clathrin binding|intracellular membrane-bounded organelle
AGA	213.604	0.166403	0.235254	1.02751	0.039147	0.814011	0.969953	5.7323	4.34083	5.13186	4.89768	5.89787	5.01664	GeneID:100152203,Genbank:XM_001927332.7	aspartylglucosaminidase		GO:0003948,GO:0005576,GO:0005615,GO:0005764,GO:0005783,GO:0006517,GO:0008233,GO:0035578,GO:0043312,GO:0043621,GO:0051604,GO:0070062	N4-(beta-N-acetylglucosaminyl)-L-asparaginase activity|extracellular region|extracellular space|lysosome|endoplasmic reticulum|protein deglycosylation|peptidase activity|azurophil granule lumen|neutrophil degranulation|protein self-association|protein maturation|extracellular exosome	ko04142,ko00511	Lysosome|Other glycan degradation
AGAP1	2907.32	0.0760552	-0.136368	0.992837	-0.0103715	0.89153	0.981101	15.1521	15.1299	15.1762	14.7144	17.0292	13.8923	GeneID:100620812,Genbank:XM_021075538.1	ArfGAP with GTPase domain, ankyrin repeat and PH domain 1		GO:0003924,GO:0005096,GO:0005525,GO:0005543,GO:0005737,GO:0015031,GO:0046872	GTPase activity|GTPase activator activity|GTP binding|phospholipid binding|cytoplasm|protein transport|metal ion binding	ko04144	Endocytosis
AGAP2	13071.6	0.0548724	2.01856	1.0798	0.110763	0.0435335	0.383552	132.641	127.674	123.402	145.894	138.473	134.404	GeneID:100622675,Genbank:XM_021091895.1	ArfGAP with GTPase domain, ankyrin repeat and PH domain 2				ko04068,ko04144	FoxO signaling pathway|Endocytosis
AGAP3	3500.64	0.061524	0.307951	1.01322	0.0189464	0.758119	0.959288	42.5354	45.2829	44.9206	46.6579	45.3646	43.9487	GeneID:100625238,Genbank:XM_021078867.1	ArfGAP with GTPase domain, ankyrin repeat and PH domain 3		GO:0003924,GO:0005096,GO:0005525,GO:0005737,GO:0007165,GO:0016020,GO:0046872	GTPase activity|GTPase activator activity|GTP binding|cytoplasm|signal transduction|membrane|metal ion binding	ko04144	Endocytosis
AGBL1	5.00416	0.95408	-0.582015	0.680521	-0.555289	0.560557	0.920448	0.0344385	0.042872	0.029363	0.0308681	0.0253606	0.0172222	GeneID:100524296,Genbank:XM_021062610.1	ATP/GTP binding protein like 1		GO:0004181,GO:0005829,GO:0008270,GO:0015631,GO:0035609,GO:0035610	metallocarboxypeptidase activity|cytosol|zinc ion binding|tubulin binding|C-terminal protein deglutamylation|protein side chain deglutamylation
AGBL2	162.135	0.181171	0.36898	1.04743	0.0668485	0.712142	0.946194	2.5439	2.45746	2.44877	2.26667	2.59384	3.02611	GeneID:100514151,Genbank:XM_021083064.1	ATP/GTP binding protein like 2		GO:0004181,GO:0005814,GO:0005829,GO:0008270,GO:0035610,GO:0036064	metallocarboxypeptidase activity|centriole|cytosol|zinc ion binding|protein side chain deglutamylation|ciliary basal body
AGBL3	104.224	0.220389	-0.950587	0.864838	-0.209499	0.341814	0.821625	0.874485	0.706905	0.732049	0.598557	0.702516	0.722239	GeneID:100524964,Genbank:XM_021079175.1	ATP/GTP binding protein like 3		GO:0004181,GO:0005829,GO:0008270,GO:0035610	metallocarboxypeptidase activity|cytosol|zinc ion binding|protein side chain deglutamylation
AGBL4	202.43	0.160842	-0.467232	0.949243	-0.0751507	0.640334	0.935432	2.24571	2.41942	2.37539	2.24043	2.03722	2.47397	GeneID:100737108,Genbank:XM_021097823.1	ATP/GTP binding protein like 4		GO:0004181,GO:0005794,GO:0005814,GO:0005829,GO:0008270,GO:0015631,GO:0035608,GO:0035609,GO:0035610,GO:0036064,GO:0051607	metallocarboxypeptidase activity|Golgi apparatus|centriole|cytosol|zinc ion binding|tubulin binding|protein deglutamylation|C-terminal protein deglutamylation|protein side chain deglutamylation|ciliary basal body|defense response to virus
AGBL5	302.464	0.139034	0.814444	1.08165	0.113235	0.41539	0.862633	4.01342	3.21814	3.42193	3.68569	3.81103	4.15497	GeneID:100523841,Genbank:XM_021087714.1	ATP/GTP binding protein like 5		GO:0004181,GO:0005634,GO:0005829,GO:0008270,GO:0015631,GO:0030496,GO:0035608,GO:0035611,GO:0045171,GO:0051607,GO:0072686	metallocarboxypeptidase activity|nucleus|cytosol|zinc ion binding|tubulin binding|midbody|protein deglutamylation|protein branching point deglutamylation|intercellular bridge|defense response to virus|mitotic spindle
AGER	2.06328	1.70978	0.311538	1.4466	0.532662	0.755391	0.958885	0	0.118317	0.0756332	0.039755	0.244964	0	GeneID:396591,Genbank:XM_013977655.2	advanced glycosylation end-product specific receptor		GO:0006954,GO:0016021	inflammatory response|integral component of membrane
AGFG1	1834.94	0.0671229	-1.67381	0.925079	-0.112351	0.0941686	0.534955	11.8739	11.4163	12.0394	11.0162	10.8283	11.1994	GeneID:100514990,Genbank:XM_021075860.1	ArfGAP with FG repeats 1		GO:0001675,GO:0003677,GO:0003723,GO:0005096,GO:0005643,GO:0005829,GO:0006406,GO:0007275,GO:0007289,GO:0031410,GO:0042995,GO:0043025,GO:0043231,GO:0045109,GO:0046872,GO:0061024	acrosome assembly|DNA binding|RNA binding|GTPase activator activity|nuclear pore|cytosol|mRNA export from nucleus|multicellular organism development|spermatid nucleus differentiation|cytoplasmic vesicle|cell projection|neuronal cell body|intracellular membrane-bounded organelle|intermediate filament organization|metal ion binding|membrane organization
AGFG2	321.703	0.145759	0.804815	1.08471	0.117309	0.420926	0.864229	2.68861	3.42286	2.82673	2.81208	3.60479	3.38454	GeneID:100514569,Genbank:XM_005661910.3	ArfGAP with FG repeats 2		GO:0005096,GO:0016020,GO:0046872	GTPase activator activity|membrane|metal ion binding
AGGF1	2002.07	0.067951	-2.0885	0.906315	-0.141916	0.0367527	0.349184	12.3698	12.4352	12.7615	11.925	10.9752	11.5185	GeneID:100520064,Genbank:XM_003123715.5	angiogenic factor with G-patch and FHA domains 1		GO:0001525,GO:0001570,GO:0001938,GO:0003676,GO:0005576,GO:0005737,GO:0007155,GO:0045766,GO:0048471	angiogenesis|vasculogenesis|positive regulation of endothelial cell proliferation|nucleic acid binding|extracellular region|cytoplasm|cell adhesion|positive regulation of angiogenesis|perinuclear region of cytoplasm
AGK	638.209	0.0982259	0.42563	1.0294	0.0418079	0.670377	0.938684	10.4037	10.4258	11.0431	11.068	11.5637	10.5517	GeneID:100233170,Genbank:XM_021078451.1	acylglycerol kinase		GO:0001727,GO:0001729,GO:0003951,GO:0004143,GO:0005524,GO:0005739,GO:0005743,GO:0005758,GO:0016020,GO:0031305,GO:0042721,GO:0043231,GO:0045039,GO:0046486,GO:0046513,GO:0046834,GO:0047620	lipid kinase activity|ceramide kinase activity|NAD+ kinase activity|diacylglycerol kinase activity|ATP binding|mitochondrion|mitochondrial inner membrane|mitochondrial intermembrane space|membrane|integral component of mitochondrial inner membrane|mitochondrial inner membrane protein insertion complex|intracellular membrane-bounded organelle|protein import into mitochondrial inner membrane|glycer…	ko00561	Glycerolipid metabolism
AGMAT	3.62475	1.18436	-0.178451	0.863728	-0.211351	0.858369	0.978492	0.363858	0.0862784	0.0413645	0.130454	0.178631	0.121307	GeneID:100519548,Genbank:XM_005665032.3	agmatinase		GO:0005739,GO:0008295,GO:0008783,GO:0033388,GO:0046872,GO:0070062,GO:0097055	mitochondrion|spermidine biosynthetic process|agmatinase activity|putrescine biosynthetic process from arginine|metal ion binding|extracellular exosome|agmatine biosynthetic process	ko00330	Arginine and proline metabolism
AGMO	44.4818	0.358559	1.20349	1.34866	0.431524	0.228785	0.731273	1.0507	1.12115	0.725015	1.3141	0.890699	1.73518	GeneID:100513371,Genbank:XM_003130179.6	alkylglycerol monooxygenase		GO:0005506,GO:0005783,GO:0005789,GO:0006643,GO:0016021,GO:0019432,GO:0046485,GO:0050479	iron ion binding|endoplasmic reticulum|endoplasmic reticulum membrane|membrane lipid metabolic process|integral component of membrane|triglyceride biosynthetic process|ether lipid metabolic process|glyceryl-ether monooxygenase activity
AGO1	1300.74	0.0768812	1.21286	1.06677	0.0932465	0.225182	0.72702	8.52082	8.07128	8.48313	9.04831	8.55263	9.44088	GeneID:100499510,Genbank:XM_005665209.3	argonaute 1, RISC catalytic component		GO:0000932,GO:0000956,GO:0000978,GO:0000993,GO:0001047,GO:0003723,GO:0003725,GO:0003727,GO:0005634,GO:0005654,GO:0005737,GO:0005829,GO:0005844,GO:0006351,GO:0007223,GO:0010501,GO:0010586,GO:0016442,GO:0016525,GO:0030529,GO:0031054,GO:0035068,GO:0035194,GO:0035196,GO:0035198,GO:0035278,GO:0035280,GO:0045652,GO:0045944,GO:0060964,GO:0070578,GO:1901224	P-body|nuclear-transcribed mRNA catabolic process|RNA polymerase II proximal promoter sequence-specific DNA binding|RNA polymerase II core binding|core promoter binding|RNA binding|double-stranded RNA binding|single-stranded RNA binding|nucleus|nucleoplasm|cytoplasm|cytosol|polysome|transcription, DNA-templated|Wnt signaling pathway, calcium modulating pathway|RNA secondary structure unwinding|mi…
AGO2	142.712	0.184477	-0.388016	0.951595	-0.0715801	0.698004	0.94301	3.34275	3.12679	3.44233	3.17518	3.26083	3.10452	GeneID:100155245,Genbank:NM_001194975.1	argonaute 2, RISC catalytic component		GO:0000340,GO:0000932,GO:0000993,GO:0001047,GO:0003723,GO:0003725,GO:0003727,GO:0003743,GO:0004521,GO:0005634,GO:0005654,GO:0005737,GO:0005829,GO:0005844,GO:0005845,GO:0006351,GO:0006412,GO:0007223,GO:0008022,GO:0009791,GO:0010501,GO:0010586,GO:0016020,GO:0016442,GO:0030054,GO:0030422,GO:0030425,GO:0030529,GO:0031047,GO:0031054,GO:0035068,GO:0035087,GO:0035194,GO:0035196,GO:0035197,GO:0035198,GO:…	RNA 7-methylguanosine cap binding|P-body|RNA polymerase II core binding|core promoter binding|RNA binding|double-stranded RNA binding|single-stranded RNA binding|translation initiation factor activity|endoribonuclease activity|nucleus|nucleoplasm|cytoplasm|cytosol|polysome|mRNA cap binding complex|transcription, DNA-templated|translation|Wnt signaling pathway, calcium modulating pathway|protein C…
AGO3	402.769	0.127956	2.38645	1.23573	0.305361	0.0170119	0.239199	1.23672	1.12808	1.3742	1.70567	1.52767	1.43977	GeneID:100499509,Genbank:XM_021093288.1	argonaute 3, RISC catalytic component		GO:0000794,GO:0000932,GO:0003723,GO:0003725,GO:0003727,GO:0005654,GO:0005737,GO:0005829,GO:0006402,GO:0007223,GO:0010501,GO:0010628,GO:0016020,GO:0016442,GO:0031054,GO:0035068,GO:0035194,GO:0035196,GO:0035198,GO:0035278,GO:0035280,GO:0036464,GO:0045652,GO:0070578,GO:0072091,GO:1901224	condensed nuclear chromosome|P-body|RNA binding|double-stranded RNA binding|single-stranded RNA binding|nucleoplasm|cytoplasm|cytosol|mRNA catabolic process|Wnt signaling pathway, calcium modulating pathway|RNA secondary structure unwinding|positive regulation of gene expression|membrane|RISC complex|pre-miRNA processing|micro-ribonucleoprotein complex|posttranscriptional gene silencing by RNA|pr…
AGO4	371.368	0.1291	1.52958	1.14669	0.197469	0.12612	0.594112	1.8598	1.61206	1.91305	2.19881	2.14796	1.90001	GeneID:100499507,Genbank:XM_021093286.1	argonaute 4, RISC catalytic component		GO:0000932,GO:0003725,GO:0003727,GO:0005654,GO:0005737,GO:0005829,GO:0006402,GO:0007130,GO:0007140,GO:0007223,GO:0008584,GO:0010501,GO:0010586,GO:0016020,GO:0016442,GO:0016604,GO:0022604,GO:0031054,GO:0035068,GO:0035194,GO:0035196,GO:0035198,GO:0035278,GO:0035280,GO:0043066,GO:0045652,GO:0070578	P-body|double-stranded RNA binding|single-stranded RNA binding|nucleoplasm|cytoplasm|cytosol|mRNA catabolic process|synaptonemal complex assembly|male meiotic nuclear division|Wnt signaling pathway, calcium modulating pathway|male gonad development|RNA secondary structure unwinding|miRNA metabolic process|membrane|RISC complex|nuclear body|regulation of cell morphogenesis|pre-miRNA processing|mic…
AGPAT1	1304.57	0.076577	-0.429296	0.977471	-0.0328742	0.667708	0.938359	91.5962	85.9414	82.7936	87.7169	85.0588	84.4728	GeneID:613128,Genbank:NM_001033008.2	1-acylglycerol-3-phosphate O-acyltransferase 1		GO:0001819,GO:0003841,GO:0005789,GO:0006654,GO:0016021,GO:0016024,GO:0016411,GO:0046474	positive regulation of cytokine production|1-acylglycerol-3-phosphate O-acyltransferase activity|endoplasmic reticulum membrane|phosphatidic acid biosynthetic process|integral component of membrane|CDP-diacylglycerol biosynthetic process|acylglycerol O-acyltransferase activity|glycerophospholipid biosynthetic process	ko00564,ko04072,ko04975,ko00561	Glycerophospholipid metabolism|Phospholipase D signaling pathway|Fat digestion and absorption|Glycerolipid metabolism
AGPAT3	3123.64	0.0628364	1.10596	1.04935	0.0694943	0.268746	0.765856	17.0177	16.409	15.8292	17.5641	16.5238	18.1588	GeneID:100233171,Genbank:XM_021068324.1	1-acylglycerol-3-phosphate O-acyltransferase 3		GO:0000139,GO:0003841,GO:0005635,GO:0005783,GO:0005789,GO:0005886,GO:0006654,GO:0008654,GO:0016020,GO:0016021,GO:0016024	Golgi membrane|1-acylglycerol-3-phosphate O-acyltransferase activity|nuclear envelope|endoplasmic reticulum|endoplasmic reticulum membrane|plasma membrane|phosphatidic acid biosynthetic process|phospholipid biosynthetic process|membrane|integral component of membrane|CDP-diacylglycerol biosynthetic process	ko00564,ko04072,ko00561	Glycerophospholipid metabolism|Phospholipase D signaling pathway|Glycerolipid metabolism
AGPAT4	1204.51	0.0864253	1.34818	1.08411	0.116517	0.177601	0.679579	24.6514	24.8306	24.9057	28.3106	28.8466	24.3877	GeneID:100156632,Genbank:XM_021097343.1	1-acylglycerol-3-phosphate O-acyltransferase 4		GO:0003841,GO:0016021,GO:0016024	1-acylglycerol-3-phosphate O-acyltransferase activity|integral component of membrane|CDP-diacylglycerol biosynthetic process	ko00564,ko04072,ko00561	Glycerophospholipid metabolism|Phospholipase D signaling pathway|Glycerolipid metabolism
AGPAT5	1715.5	0.0680035	-0.120919	0.994317	-0.00822294	0.903755	0.982699	27.2049	26.8021	27.2467	27.7325	26.4927	27.4517	GeneID:100233172,Genbank:XM_013983990.2	1-acylglycerol-3-phosphate O-acyltransferase 5		GO:0002244,GO:0003841,GO:0005635,GO:0005739,GO:0005741,GO:0005789,GO:0006639,GO:0006654,GO:0008654,GO:0016021,GO:0016024	hematopoietic progenitor cell differentiation|1-acylglycerol-3-phosphate O-acyltransferase activity|nuclear envelope|mitochondrion|mitochondrial outer membrane|endoplasmic reticulum membrane|acylglycerol metabolic process|phosphatidic acid biosynthetic process|phospholipid biosynthetic process|integral component of membrane|CDP-diacylglycerol biosynthetic process	ko00564,ko04072,ko00561	Glycerophospholipid metabolism|Phospholipase D signaling pathway|Glycerolipid metabolism
AGPS	992.23	0.0859756	1.83631	1.11564	0.157878	0.0663124	0.465192	6.52374	6.06622	6.16382	7.51268	6.84548	6.79381	GeneID:100627169,Genbank:XM_021075128.1	alkylglycerone phosphate synthase		GO:0005730,GO:0005739,GO:0005777,GO:0005778,GO:0005782,GO:0008609,GO:0008610,GO:0008611,GO:0016020,GO:0016614,GO:0071949	nucleolus|mitochondrion|peroxisome|peroxisomal membrane|peroxisomal matrix|alkylglycerone-phosphate synthase activity|lipid biosynthetic process|ether lipid biosynthetic process|membrane|oxidoreductase activity, acting on CH-OH group of donors|FAD binding	ko00565,ko04146	Ether lipid metabolism|Peroxisome
AGRN	1305.55	0.0774269	0.353359	1.01915	0.0273595	0.723819	0.949548	10.5776	9.79812	9.44034	9.8766	10.5181	10.3284	GeneID:100621139,Genbank:XM_021095177.1	agrin				ko04512	ECM-receptor interaction
AGT	2677.27	0.252732	-0.928821	0.849837	-0.234743	0.352982	0.829466	64.1322	82.8236	74.257	67.7427	76.9513	45.2676	GeneID:100157073,Genbank:XM_021073990.1	angiotensinogen		GO:0003081,GO:0005615,GO:0042310	regulation of systemic arterial blood pressure by renin-angiotensin|extracellular space|vasoconstriction	ko04270,ko04614,ko04924	Vascular smooth muscle contraction|Renin-angiotensin system|Renin secretion
AGTPBP1	2123.02	0.0712466	-3.86796	0.826119	-0.275579	0.000109749	0.0101714	28.3646	27.6727	28.4262	23.9166	21.6199	24.9963	GeneID:100518857,Genbank:XM_013989714.2	ATP/GTP binding protein 1		GO:0001754,GO:0004181,GO:0005634,GO:0005730,GO:0005737,GO:0005739,GO:0005829,GO:0007005,GO:0008270,GO:0015631,GO:0021702,GO:0021772,GO:0035609,GO:0035610,GO:0043231,GO:0050905	eye photoreceptor cell differentiation|metallocarboxypeptidase activity|nucleus|nucleolus|cytoplasm|mitochondrion|cytosol|mitochondrion organization|zinc ion binding|tubulin binding|cerebellar Purkinje cell differentiation|olfactory bulb development|C-terminal protein deglutamylation|protein side chain deglutamylation|intracellular membrane-bounded organelle|neuromuscular process
AGTR1	19.7634	0.487718	0.682319	1.25944	0.332779	0.495037	0.901015	0.33555	0.429656	0.457756	0.433098	0.518909	0.604095	GeneID:100519976,Genbank:XM_003132469.4	angiotensin II receptor type 1		GO:0004945,GO:0005886,GO:0016021,GO:0019229	angiotensin type II receptor activity|plasma membrane|integral component of membrane|regulation of vasoconstriction	ko04924,ko04614,ko04261,ko04925,ko04072,ko04080,ko04020,ko04270,ko04022	Renin secretion|Renin-angiotensin system|Adrenergic signaling in cardiomyocytes|Aldosterone synthesis and secretion|Phospholipase D signaling pathway|Neuroactive ligand-receptor interaction|Calcium signaling pathway|Vascular smooth muscle contraction|cGMP-PKG signaling pathway
AGTRAP	153.509	0.194215	0.789618	1.11215	0.153356	0.429751	0.866713	2.51273	3.32056	2.94664	3.43032	2.77557	3.65377	GeneID:100524812,Genbank:XM_003127573.6	angiotensin II receptor associated protein
AGXT2	48.251	0.368304	1.50213	1.46738	0.553242	0.133062	0.607085	0.843038	0.626966	1.64669	1.53875	1.35451	1.73747	GeneID:100513890,Genbank:NM_001244884.1	alanine--glyoxylate aminotransferase 2		GO:0005739,GO:0008453,GO:0009436,GO:0019481,GO:0030170,GO:0042802,GO:0045429,GO:0047305	mitochondrion|alanine-glyoxylate transaminase activity|glyoxylate catabolic process|L-alanine catabolic process, by transamination|pyridoxal phosphate binding|identical protein binding|positive regulation of nitric oxide biosynthetic process|(R)-3-amino-2-methylpropionate-pyruvate transaminase activity	ko00260,ko00250,ko00280,ko00270	Glycine, serine and threonine metabolism|Alanine, aspartate and glutamate metabolism|Valine, leucine and isoleucine degradation|Cysteine and methionine metabolism
AHCTF1	717.067	0.10423	-0.438422	0.968822	-0.0456967	0.661081	0.937282	4.15959	4.5623	5.16829	4.70396	4.49349	4.41079	GeneID:100511581,Genbank:XM_021064442.1	AT-hook containing transcription factor 1		GO:0000777,GO:0000910,GO:0003677,GO:0003700,GO:0005634,GO:0005643,GO:0005654,GO:0005829,GO:0007062,GO:0015031,GO:0016363,GO:0031965,GO:0034399,GO:0051028,GO:0051292,GO:0070062	condensed chromosome kinetochore|cytokinesis|DNA binding|DNA binding transcription factor activity|nucleus|nuclear pore|nucleoplasm|cytosol|sister chromatid cohesion|protein transport|nuclear matrix|nuclear membrane|nuclear periphery|mRNA transport|nuclear pore complex assembly|extracellular exosome
AHCY	877.918	0.0975949	-1.14485	0.925477	-0.111732	0.252271	0.752659	25.3073	23.6558	23.6745	23.4886	24.5166	19.9789	GeneID:497050,Genbank:NM_001011727.1	adenosylhomocysteinase		GO:0004013,GO:0005829,GO:0006730,GO:0019510,GO:0033353,GO:0042470,GO:0051287	adenosylhomocysteinase activity|cytosol|one-carbon metabolic process|S-adenosylhomocysteine catabolic process|S-adenosylmethionine cycle|melanosome|NAD binding	ko00270	Cysteine and methionine metabolism
AHCYL1	8769.36	0.0535972	2.39081	1.09288	0.128141	0.0168112	0.237223	112.92	119.22	110.524	128.06	126.858	123.651	GeneID:100512899,Genbank:XM_021088652.1	adenosylhomocysteinase like 1		GO:0003723,GO:0005737,GO:0005783,GO:0005829,GO:0006378,GO:0006611,GO:0006730,GO:0010765,GO:0016324,GO:0031440,GO:0032412,GO:0033353,GO:0038166,GO:0042045,GO:0042802,GO:0043231,GO:0044070,GO:0051592	RNA binding|cytoplasm|endoplasmic reticulum|cytosol|mRNA polyadenylation|protein export from nucleus|one-carbon metabolic process|positive regulation of sodium ion transport|apical plasma membrane|regulation of mRNA 3'-end processing|regulation of ion transmembrane transporter activity|S-adenosylmethionine cycle|angiotensin-activated signaling pathway|epithelial fluid transport|identical protein …	ko00270	Cysteine and methionine metabolism
AHCYL2	2564.59	0.0618252	2.41871	1.10921	0.149537	0.0155756	0.226062	18.6357	18.6551	18.8251	20.72	21.6788	20.5383	GeneID:100514931,Genbank:XM_005657758.2	adenosylhomocysteinase like 2		GO:0005783,GO:0005829,GO:0006730,GO:0016787,GO:0033353,GO:0043005,GO:0043231	endoplasmic reticulum|cytosol|one-carbon metabolic process|hydrolase activity|S-adenosylmethionine cycle|neuron projection|intracellular membrane-bounded organelle	ko00270	Cysteine and methionine metabolism
AHDC1	910.944	0.0846076	-0.621211	0.964224	-0.0525592	0.534461	0.911901	8.13148	7.49898	7.87963	7.62015	7.45815	7.84069	GeneID:100512968,Genbank:XM_021095642.1	AT-hook DNA binding motif containing 1		GO:0003677	DNA binding
AHI1	1281.9	0.114181	-2.06144	0.849463	-0.235377	0.0392613	0.36147	14.6629	13.1159	18.2443	13.5297	11.4281	14.5804	GeneID:100514806,Genbank:XM_003121183.6	Abelson helper integration site 1		GO:0001738,GO:0001947,GO:0002092,GO:0005813,GO:0005814,GO:0005829,GO:0005911,GO:0005912,GO:0005929,GO:0007169,GO:0007417,GO:0010842,GO:0016192,GO:0030862,GO:0030902,GO:0034613,GO:0035844,GO:0035845,GO:0036038,GO:0036064,GO:0039008,GO:0039023,GO:0042802,GO:0043066,GO:0045944,GO:0050795,GO:0060271,GO:0065001,GO:0070121,GO:0070986,GO:0071599,GO:0097711,GO:0097730	morphogenesis of a polarized epithelium|heart looping|positive regulation of receptor internalization|centrosome|centriole|cytosol|cell-cell junction|adherens junction|cilium|transmembrane receptor protein tyrosine kinase signaling pathway|central nervous system development|retina layer formation|vesicle-mediated transport|positive regulation of polarized epithelial cell differentiation|hindbrain…
AHNAK	1709.89	0.0726589	2.50013	1.13419	0.181657	0.0124147	0.199267	4.73696	4.49496	5.03032	5.2851	5.46858	5.60438	GeneID:106504153,Genbank:XM_013994215.2	AHNAK nucleoprotein		GO:0003723,GO:0005634,GO:0005737,GO:0005765,GO:0005829,GO:0005886,GO:0005925,GO:0015629,GO:0016020,GO:0030315,GO:0031982,GO:0042383,GO:0043034,GO:0043484,GO:0044291,GO:0044548,GO:0045296,GO:0051259,GO:0070062,GO:0097493,GO:1901385	RNA binding|nucleus|cytoplasm|lysosomal membrane|cytosol|plasma membrane|focal adhesion|actin cytoskeleton|membrane|T-tubule|vesicle|sarcolemma|costamere|regulation of RNA splicing|cell-cell contact zone|S100 protein binding|cadherin binding|protein oligomerization|extracellular exosome|structural molecule activity conferring elasticity|regulation of voltage-gated calcium channel activity
AHR	204.715	0.157473	-0.542015	0.942554	-0.0853526	0.587808	0.928267	2.31668	2.51887	2.39277	2.40914	2.15879	2.31709	GeneID:396654,Genbank:NM_001303026.1	aryl hydrocarbon receptor	bHLH	GO:0003700,GO:0004874,GO:0005634,GO:0005737,GO:0006351,GO:0007049,GO:0009410,GO:0032922,GO:0034751,GO:0045892,GO:0045893,GO:0046983,GO:0070888	DNA binding transcription factor activity|aryl hydrocarbon receptor activity|nucleus|cytoplasm|transcription, DNA-templated|cell cycle|response to xenobiotic stimulus|circadian regulation of gene expression|aryl hydrocarbon receptor complex|negative regulation of transcription, DNA-templated|positive regulation of transcription, DNA-templated|protein dimerization activity|E-box binding
AHRR	30.8499	0.425796	-0.36963	0.896648	-0.157387	0.711659	0.946194	0.180396	0.128327	0.246096	0.229312	0.120768	0.15309	GeneID:100624847,Genbank:XM_021077068.1	aryl-hydrocarbon receptor repressor		GO:0001191,GO:0003677,GO:0005654,GO:0005829,GO:0006351,GO:0006805,GO:0009410,GO:0046983	transcriptional repressor activity, RNA polymerase II transcription factor binding|DNA binding|nucleoplasm|cytosol|transcription, DNA-templated|xenobiotic metabolic process|response to xenobiotic stimulus|protein dimerization activity
AHSA1	2809.25	0.0755033	-1.57084	0.921079	-0.118604	0.116219	0.577867	115.028	131.588	115.782	111.005	120.705	105.761	GeneID:100626607,Genbank:XM_001928890.6	activator of HSP90 ATPase activity 1		GO:0001671,GO:0005783,GO:0005829,GO:0006950,GO:0045296,GO:0051087,GO:0070062	ATPase activator activity|endoplasmic reticulum|cytosol|response to stress|cadherin binding|chaperone binding|extracellular exosome
AHSA2	205.643	0.196606	-0.589462	0.922812	-0.115892	0.555551	0.918362	2.05204	3.06809	3.08016	2.6433	2.97249	2.04011	GeneID:110260004,Genbank:XM_021087503.1	activator of HSP90 ATPase homolog 2		GO:0001671,GO:0006950,GO:0051087	ATPase activator activity|response to stress|chaperone binding
AHSP	6.79011	0.971135	0.458765	1.36181	0.445523	0.646403	0.937227	0.0932709	1.39334	0.19086	0.802571	1.03027	0.466436	GeneID:102164536,Genbank:XM_021086373.1	alpha hemoglobin stabilizing protein		GO:0005737,GO:0006457,GO:0030218,GO:0030492,GO:0050821	cytoplasm|protein folding|erythrocyte differentiation|hemoglobin binding|protein stabilization
AIDA	911.117	0.0864918	0.374272	1.02269	0.0323714	0.708202	0.946092	17.8938	19.4882	17.4115	18.9113	18.5826	19.1432	GeneID:100518326,Genbank:XM_003130513.6	axin interactor, dorsalization associated		GO:0005737,GO:0009953,GO:0016020,GO:0019904,GO:0035091,GO:0043496,GO:0043508,GO:0046329,GO:0048264	cytoplasm|dorsal/ventral pattern formation|membrane|protein domain specific binding|phosphatidylinositol binding|regulation of protein homodimerization activity|negative regulation of JUN kinase activity|negative regulation of JNK cascade|determination of ventral identity
AIF1	324.157	0.154188	-1.20666	0.879008	-0.186052	0.227564	0.728407	17.5286	17.8906	12.9347	12.7298	13.6179	16.5901	GeneID:397271,Genbank:XM_013977627.2	allograft inflammatory factor 1		GO:0001891,GO:0005509,GO:0005634,GO:0005737,GO:0005829,GO:0005856,GO:0006911,GO:0006954,GO:0016601,GO:0030027,GO:0030041,GO:0032587,GO:0042102,GO:0048661,GO:0051015,GO:0051017,GO:0071346,GO:0071673,GO:0090026,GO:0097178,GO:1900087,GO:2000406	phagocytic cup|calcium ion binding|nucleus|cytoplasm|cytosol|cytoskeleton|phagocytosis, engulfment|inflammatory response|Rac protein signal transduction|lamellipodium|actin filament polymerization|ruffle membrane|positive regulation of T cell proliferation|positive regulation of smooth muscle cell proliferation|actin filament binding|actin filament bundle assembly|cellular response to interferon-…
AIF1L	494.69	0.11326	1.11828	1.09176	0.126656	0.263448	0.760271	44.0362	36.8048	42.8284	43.0427	45.8682	47.6444	GeneID:100624075,Genbank:XM_003353688.4	allograft inflammatory factor 1 like		GO:0005509,GO:0005737,GO:0005884,GO:0005925,GO:0015629,GO:0032587,GO:0043234,GO:0051015	calcium ion binding|cytoplasm|actin filament|focal adhesion|actin cytoskeleton|ruffle membrane|protein complex|actin filament binding
AIFM1	528.844	0.104489	0.262064	1.01916	0.0273829	0.793272	0.966122	12.951	12.6762	13.3239	12.5985	13.4905	14.0486	GeneID:100524062,Genbank:XM_021079475.1	apoptosis inducing factor mitochondria associated 1				ko04214,ko04210	Apoptosis - fly|Apoptosis
AIFM2	633.042	0.0972444	0.0307147	1.00207	0.00298684	0.975497	0.996008	17.572	16.7421	15.9232	16.5206	16.7415	17.6259	GeneID:100153541,Genbank:XM_021073861.1	apoptosis inducing factor, mitochondria associated 2		GO:0003677,GO:0004174,GO:0005741,GO:0005811,GO:0005829,GO:0008637,GO:0016021,GO:0043065,GO:0050660	DNA binding|electron-transferring-flavoprotein dehydrogenase activity|mitochondrial outer membrane|lipid droplet|cytosol|apoptotic mitochondrial changes|integral component of membrane|positive regulation of apoptotic process|flavin adenine dinucleotide binding
AIFM3	577.967	0.134692	3.24408	1.35374	0.436954	0.00117829	0.0464304	11.5371	11.4586	7.63794	13.5685	14.64	13.6952	GeneID:100525540,Genbank:XM_021074028.1	apoptosis inducing factor, mitochondria associated 3		GO:0005739,GO:0005743,GO:0005783,GO:0005829,GO:0016491,GO:0046872,GO:0050660,GO:0051537,GO:0097194	mitochondrion|mitochondrial inner membrane|endoplasmic reticulum|cytosol|oxidoreductase activity|metal ion binding|flavin adenine dinucleotide binding|2 iron, 2 sulfur cluster binding|execution phase of apoptosis
AIG1	658.786	0.0984982	2.1235	1.15602	0.209161	0.0337121	0.334405	5.20878	5.3123	4.63881	5.90998	5.70978	6.0912	GeneID:100151943,Genbank:XM_021072473.1	androgen induced 1		GO:0012505,GO:0016020,GO:0016021,GO:0016787,GO:0042758	endomembrane system|membrane|integral component of membrane|hydrolase activity|long-chain fatty acid catabolic process
AIMP1	833.565	0.0905103	-1.06798	0.935194	-0.096663	0.285531	0.77755	36.1479	39.0204	38.0609	33.132	36.7217	37.2064	GeneID:100135670,Genbank:XM_021100267.1	aminoacyl tRNA synthetase complex interacting multifunctional protein 1		GO:0000049,GO:0001525,GO:0001937,GO:0005125,GO:0005615,GO:0005634,GO:0005783,GO:0005794,GO:0005829,GO:0006006,GO:0006418,GO:0006915,GO:0006935,GO:0006954,GO:0007155,GO:0007165,GO:0007267,GO:0009611,GO:0009986,GO:0016020,GO:0017101,GO:0017102,GO:0030133,GO:0042803,GO:0050900,GO:0051020,GO:0051607	tRNA binding|angiogenesis|negative regulation of endothelial cell proliferation|cytokine activity|extracellular space|nucleus|endoplasmic reticulum|Golgi apparatus|cytosol|glucose metabolic process|tRNA aminoacylation for protein translation|apoptotic process|chemotaxis|inflammatory response|cell adhesion|signal transduction|cell-cell signaling|response to wounding|cell surface|membrane|aminoacyl…
AIMP2	258.93	0.152983	-0.0847722	0.991051	-0.0129687	0.932442	0.987001	10.6779	12.274	14.2542	12.5202	12.8579	11.9174	GeneID:100514707,Genbank:NM_001244557.1	aminoacyl tRNA synthetase complex interacting multifunctional protein 2		GO:0005634,GO:0005829,GO:0006412,GO:0006461,GO:0006915,GO:0008285,GO:0017101,GO:0031398,GO:0032947,GO:0060510,GO:1903632	nucleus|cytosol|translation|protein complex assembly|apoptotic process|negative regulation of cell proliferation|aminoacyl-tRNA synthetase multienzyme complex|positive regulation of protein ubiquitination|protein complex scaffold activity|Type II pneumocyte differentiation|positive regulation of aminoacyl-tRNA ligase activity
AIP	788.515	0.0970556	0.658115	1.04527	0.0638737	0.510464	0.906604	38.5686	37.3867	33.0697	40.8997	37.7026	36.5831	GeneID:100511065,Genbank:XM_003122456.3	aryl hydrocarbon receptor interacting protein		GO:0005737	cytoplasm
AIPL1	33.661	0.380892	0.853901	1.25288	0.325244	0.39316	0.851287	0.702182	0.499507	0.618653	0.881138	0.624815	0.799847	GeneID:100524458,Genbank:XM_013981245.2	aryl hydrocarbon receptor interacting protein like 1		GO:0005634,GO:0005737,GO:0007601	nucleus|cytoplasm|visual perception
AIRE	19.1837	0.571569	-0.286613	0.892659	-0.163819	0.774408	0.961953	0.811154	0.513913	0.285288	0.4635	0.224001	0.76059	GeneID:100621659,Genbank:XM_021069857.1	autoimmune regulator	SAND			ko04120	Ubiquitin mediated proteolysis
AJAP1	478.399	0.107478	-0.187933	0.986097	-0.0201987	0.850929	0.977948	4.18193	4.4071	4.38459	4.18272	4.35268	4.39826	GeneID:110261085,Genbank:XM_021095233.1	adherens junctions associated protein 1		GO:0001953,GO:0005913,GO:0007155,GO:0008013,GO:0009898,GO:0009986,GO:0016323,GO:0016324,GO:0030860,GO:0032403,GO:0044214,GO:0044291,GO:0061045	negative regulation of cell-matrix adhesion|cell-cell adherens junction|cell adhesion|beta-catenin binding|cytoplasmic side of plasma membrane|cell surface|basolateral plasma membrane|apical plasma membrane|regulation of polarized epithelial cell differentiation|protein complex binding|spanning component of plasma membrane|cell-cell contact zone|negative regulation of wound healing
AJUBA	72.6202	0.257688	1.07505	1.2117	0.277029	0.28235	0.776143	1.42248	1.68649	1.52471	1.74857	1.84562	2.07763	GeneID:100626166,Genbank:XM_021099246.1	ajuba LIM protein		GO:0000122,GO:0000932,GO:0001666,GO:0003682,GO:0003714,GO:0005634,GO:0005667,GO:0005794,GO:0005815,GO:0005829,GO:0005886,GO:0005911,GO:0005912,GO:0005925,GO:0006351,GO:0006355,GO:0007010,GO:0016339,GO:0030027,GO:0030032,GO:0030334,GO:0031328,GO:0031334,GO:0033673,GO:0034613,GO:0035195,GO:0035313,GO:0035329,GO:0035331,GO:0043087,GO:0043123,GO:0043406,GO:0045294,GO:0046474,GO:0046872,GO:0048041,GO:…	negative regulation of transcription from RNA polymerase II promoter|P-body|response to hypoxia|chromatin binding|transcription corepressor activity|nucleus|transcription factor complex|Golgi apparatus|microtubule organizing center|cytosol|plasma membrane|cell-cell junction|adherens junction|focal adhesion|transcription, DNA-templated|regulation of transcription, DNA-templated|cytoskeleton organi…	ko04392,ko04390,ko04391	Hippo signaling pathway -multiple species|Hippo signaling pathway|Hippo signaling pathway - fly
AK1	1592.29	0.0756911	0.402718	1.02135	0.0304822	0.687156	0.942933	49.5164	45.8738	43.6108	46.2716	50.203	47.0671	GeneID:100521423,Genbank:XM_003122177.6	adenylate kinase 1		GO:0004017,GO:0004550,GO:0005524,GO:0005737,GO:0006165,GO:0009142,GO:0046034	adenylate kinase activity|nucleoside diphosphate kinase activity|ATP binding|cytoplasm|nucleoside diphosphate phosphorylation|nucleoside triphosphate biosynthetic process|ATP metabolic process	ko00230	Purine metabolism
AK2	219.22	0.153431	1.49223	1.17198	0.228954	0.13564	0.612304	1.78692	1.88865	1.66365	2.04953	2.23577	2.04134	GeneID:100620859,Genbank:XM_021095843.1	adenylate kinase 2		GO:0004017,GO:0005524,GO:0005739,GO:0005743,GO:0005758,GO:0006172,GO:0097226	adenylate kinase activity|ATP binding|mitochondrion|mitochondrial inner membrane|mitochondrial intermembrane space|ADP biosynthetic process|sperm mitochondrial sheath	ko00230	Purine metabolism
AK3	990.402	0.0857543	-0.449278	0.973648	-0.0385276	0.653231	0.937251	10.096	9.25841	10.3006	9.24097	10.1382	9.8233	GeneID:100155691,Genbank:XM_021064132.1	adenylate kinase 3		GO:0004017,GO:0005524,GO:0005525,GO:0005739,GO:0005759,GO:0046033,GO:0046039,GO:0046041,GO:0046051,GO:0046899	adenylate kinase activity|ATP binding|GTP binding|mitochondrion|mitochondrial matrix|AMP metabolic process|GTP metabolic process|ITP metabolic process|UTP metabolic process|nucleoside triphosphate adenylate kinase activity	ko00230	Purine metabolism
AK4	3211.96	0.0990654	0.0278813	1.00192	0.00276207	0.977757	0.996679	31.372	21.6891	25.5886	28.3263	26.0487	25.2495	GeneID:733667,Genbank:XM_005656154.3	adenylate kinase 4		GO:0004017,GO:0004550,GO:0005524,GO:0005525,GO:0005759,GO:0006165,GO:0009142,GO:0046033,GO:0046034,GO:0046039,GO:0046899	adenylate kinase activity|nucleoside diphosphate kinase activity|ATP binding|GTP binding|mitochondrial matrix|nucleoside diphosphate phosphorylation|nucleoside triphosphate biosynthetic process|AMP metabolic process|ATP metabolic process|GTP metabolic process|nucleoside triphosphate adenylate kinase activity	ko00230	Purine metabolism
AK5	3727.79	0.067749	-1.27982	0.94167	-0.0867066	0.200608	0.702195	65.358	56.4272	57.6414	58.6009	56.9592	55.2251	GeneID:733697,Genbank:XM_003127921.6	adenylate kinase 5		GO:0004017,GO:0004550,GO:0005524,GO:0005815,GO:0005829,GO:0006165,GO:0009142,GO:0046034	adenylate kinase activity|nucleoside diphosphate kinase activity|ATP binding|microtubule organizing center|cytosol|nucleoside diphosphate phosphorylation|nucleoside triphosphate biosynthetic process|ATP metabolic process	ko00230	Purine metabolism
AK6	156.282	0.217288	-1.27332	0.825491	-0.276676	0.202905	0.704751	6.19189	3.3182	5.20895	4.05517	3.83017	4.40389	GeneID:106504175,Genbank:XM_003134021.5	adenylate kinase 6		GO:0004017,GO:0005524,GO:0005634,GO:0005654,GO:0005737,GO:0005829,GO:0015030	adenylate kinase activity|ATP binding|nucleus|nucleoplasm|cytoplasm|cytosol|Cajal body	ko03008,ko00230	Ribosome biogenesis in eukaryotes|Purine metabolism
AK7	95.7681	0.333313	0.809952	1.20578	0.269968	0.417968	0.863655	1.66733	0.984191	2.15962	2.15585	0.960054	2.7498	GeneID:100152573,Genbank:XM_021099677.1	adenylate kinase 7		GO:0004017,GO:0004127,GO:0004550,GO:0005524,GO:0005829,GO:0006165,GO:0009142,GO:0015949,GO:0019206,GO:0030030	adenylate kinase activity|cytidylate kinase activity|nucleoside diphosphate kinase activity|ATP binding|cytosol|nucleoside diphosphate phosphorylation|nucleoside triphosphate biosynthetic process|nucleobase-containing small molecule interconversion|nucleoside kinase activity|cell projection organization	ko00230	Purine metabolism
AK8	158.144	0.21491	1.39742	1.23142	0.30032	0.162287	0.65961	4.93606	3.51133	4.56933	4.74034	4.38138	7.08213	GeneID:102167403,Genbank:XM_021070832.1	adenylate kinase 8		GO:0004017,GO:0004127,GO:0004550,GO:0005524,GO:0005829,GO:0005930,GO:0006165,GO:0009142,GO:0015949,GO:0019206,GO:0021591,GO:0036126	adenylate kinase activity|cytidylate kinase activity|nucleoside diphosphate kinase activity|ATP binding|cytosol|axoneme|nucleoside diphosphate phosphorylation|nucleoside triphosphate biosynthetic process|nucleobase-containing small molecule interconversion|nucleoside kinase activity|ventricular system development|sperm flagellum	ko00230	Purine metabolism
AK9	16.5933	0.590199	1.17324	1.61602	0.692444	0.240701	0.742712	0.166033	0.0421821	0.105161	0.144568	0.131	0.237231	GeneID:102166322,Genbank:XM_021091050.1	adenylate kinase 9		GO:0004550,GO:0005524,GO:0005634,GO:0005654,GO:0005737,GO:0005829,GO:0006174,GO:0006186,GO:0006756,GO:0006757,GO:0015949,GO:0019206,GO:0031965,GO:0050145,GO:0061508,GO:0061565,GO:0061566,GO:0061567,GO:0061568,GO:0061569,GO:0061570,GO:0061571	nucleoside diphosphate kinase activity|ATP binding|nucleus|nucleoplasm|cytoplasm|cytosol|dADP phosphorylation|dGDP phosphorylation|AMP phosphorylation|ATP generation from ADP|nucleobase-containing small molecule interconversion|nucleoside kinase activity|nuclear membrane|nucleoside phosphate kinase activity|CDP phosphorylation|dAMP phosphorylation|CMP phosphorylation|dCMP phosphorylation|GDP phos…	ko00230,ko00240	Purine metabolism|Pyrimidine metabolism
AKAIN1	139.802	0.188293	-1.03944	0.873138	-0.195719	0.2986	0.789026	1.73895	1.78277	1.7792	1.44253	1.50654	1.72788	GeneID:106508616,Genbank:XM_021096130.1	A-kinase anchor inhibitor 1		GO:0005829,GO:0008104,GO:0010738,GO:0034237,GO:0051018	cytosol|protein localization|regulation of protein kinase A signaling|protein kinase A regulatory subunit binding|protein kinase A binding
AKAP1	391.196	0.121284	-0.141008	0.988216	-0.017102	0.887863	0.980832	8.75491	9.20583	8.15312	9.0053	8.96652	8.11883	GeneID:100533549,Genbank:NM_001204773.1	A-kinase anchoring protein 1		GO:0003723,GO:0005739,GO:0005741,GO:0005829,GO:0007596,GO:0010738,GO:0016020,GO:0016021,GO:0034237	RNA binding|mitochondrion|mitochondrial outer membrane|cytosol|blood coagulation|regulation of protein kinase A signaling|membrane|integral component of membrane|protein kinase A regulatory subunit binding
AKAP10	506.325	0.109875	-0.186528	0.985895	-0.0204948	0.852031	0.977976	14.9477	14.3335	16.2294	15.801	14.2698	15.2933	GeneID:397262,Genbank:NM_214138.1	A-kinase anchoring protein 10		GO:0005739,GO:0008104,GO:0016020	mitochondrion|protein localization|membrane
AKAP11	13104.2	0.0649051	-0.13398	0.993991	-0.00869601	0.893418	0.981475	73.7349	80.8576	80.8651	83.3317	72.4558	80.8396	GeneID:100736642,Genbank:XM_021065623.1	A-kinase anchoring protein 11		GO:0005730,GO:0005777,GO:0005815,GO:0005829,GO:0005886,GO:0008157,GO:0010738,GO:0035556,GO:0051018	nucleolus|peroxisome|microtubule organizing center|cytosol|plasma membrane|protein phosphatase 1 binding|regulation of protein kinase A signaling|intracellular signal transduction|protein kinase A binding
AKAP12	1499.32	0.0874439	1.10413	1.06921	0.0965493	0.269538	0.766804	9.56065	11.368	9.60937	11.7638	10.6129	10.6218	GeneID:100152595,Genbank:XM_001927265.7	A-kinase anchoring protein 12
AKAP13	1286.16	0.0882794	1.91365	1.12423	0.168936	0.0556651	0.431058	4.25708	3.46708	3.96656	4.49243	4.59311	4.20526	GeneID:397631,Genbank:XM_021099912.1	A-kinase anchoring protein 13		GO:0004691,GO:0004871,GO:0005078,GO:0005085,GO:0005089,GO:0005634,GO:0005829,GO:0005884,GO:0005938,GO:0007186,GO:0007507,GO:0010611,GO:0016020,GO:0017048,GO:0032947,GO:0035025,GO:0035556,GO:0043065,GO:0043123,GO:0043406,GO:0046872,GO:0048471,GO:0051018,GO:0051056,GO:0051168,GO:0055007,GO:0060297,GO:0060348,GO:0071875,GO:0086023,GO:1900169	cAMP-dependent protein kinase activity|signal transducer activity|MAP-kinase scaffold activity|guanyl-nucleotide exchange factor activity|Rho guanyl-nucleotide exchange factor activity|nucleus|cytosol|actin filament|cell cortex|G-protein coupled receptor signaling pathway|heart development|regulation of cardiac muscle hypertrophy|membrane|Rho GTPase binding|protein complex scaffold activity|posit…
AKAP14	4.7555	1.07745	0.497067	1.44951	0.535565	0.619142	0.931461	0.0720604	0	0.0526631	0.04429	0.0568558	0.0823691	GeneID:100512513,Genbank:XM_003135329.5	A-kinase anchoring protein 14		GO:0005930,GO:0005952,GO:0007283,GO:0034237,GO:0035686,GO:0051018	axoneme|cAMP-dependent protein kinase complex|spermatogenesis|protein kinase A regulatory subunit binding|sperm fibrous sheath|protein kinase A binding
AKAP17B	130.417	0.212321	0.633305	1.09769	0.134464	0.526534	0.909482	0.600487	0.796754	0.630414	0.892998	0.692139	0.663262	GeneID:100513257,Genbank:XM_021080242.1	A kinase (PRKA) anchor protein 17B		GO:0003723,GO:0005681,GO:0006397,GO:0008380,GO:0016607	RNA binding|spliceosomal complex|mRNA processing|RNA splicing|nuclear speck
AKAP2	2125.4	0.0688345	-0.14089	0.9933	-0.00969812	0.887956	0.980832	12.757	13.6444	13.6742	13.8508	12.8551	13.5357	GeneID:100153149,Genbank:XM_021087791.1	A-kinase anchoring protein 2
AKAP3	218.618	0.17625	-1.32522	0.850528	-0.233569	0.185099	0.684098	1.43228	1.93686	1.86443	1.25837	1.49595	1.74456	GeneID:100337663,Genbank:XM_021090980.1	A-kinase anchoring protein 3		GO:0001669,GO:0005737,GO:0010738,GO:0035686,GO:0051018,GO:0097228	acrosomal vesicle|cytoplasm|regulation of protein kinase A signaling|sperm fibrous sheath|protein kinase A binding|sperm principal piece
AKAP5	1042.53	0.0984625	-1.45158	0.905681	-0.142926	0.14662	0.630909	21.3626	21.9629	23.2929	18.6586	18.7528	23.5887	GeneID:100153460,Genbank:XM_021099926.1	A-kinase anchoring protein 5		GO:0005516,GO:0005622,GO:0006605,GO:0007165,GO:0016020	calmodulin binding|intracellular|protein targeting|signal transduction|membrane
AKAP6	4689.54	0.0606777	-1.21597	0.950144	-0.0737821	0.223997	0.726204	17.7583	17.1996	18.6883	17.3758	16.3453	17.815	GeneID:100155181,Genbank:XM_021099861.1	A-kinase anchoring protein 6		GO:0001508,GO:0005635,GO:0005737,GO:0005901,GO:0006605,GO:0008179,GO:0010738,GO:0010880,GO:0014701,GO:0014704,GO:0016529,GO:0019933,GO:0030307,GO:0030315,GO:0031965,GO:0032516,GO:0032947,GO:0034237,GO:0034704,GO:0035556,GO:0043495,GO:0044325,GO:0048471,GO:0051018,GO:0051281,GO:0060306,GO:0060316,GO:0061051,GO:0070886,GO:0071320,GO:0071345,GO:1901381,GO:1902261	action potential|nuclear envelope|cytoplasm|caveola|protein targeting|adenylate cyclase binding|regulation of protein kinase A signaling|regulation of release of sequestered calcium ion into cytosol by sarcoplasmic reticulum|junctional sarcoplasmic reticulum membrane|intercalated disc|sarcoplasmic reticulum|cAMP-mediated signaling|positive regulation of cell growth|T-tubule|nuclear membrane|posit…
AKAP7	453.071	0.115045	-0.177249	0.985965	-0.0203916	0.859313	0.97879	8.44288	8.22316	7.74469	8.60217	7.37759	8.34158	GeneID:100523651,Genbank:XM_021088003.1	A-kinase anchoring protein 7		GO:0000166,GO:0005634,GO:0005829,GO:0008104,GO:0010738,GO:0019901,GO:0034237,GO:0043234,GO:0051018	nucleotide binding|nucleus|cytosol|protein localization|regulation of protein kinase A signaling|protein kinase binding|protein kinase A regulatory subunit binding|protein complex|protein kinase A binding
AKAP8L	630.154	0.110311	-0.300168	0.97731	-0.033112	0.764049	0.960758	1.81606	1.87746	2.22972	2.01739	2.01261	1.82531	GeneID:100518955,Genbank:XM_003123432.4	A-kinase anchoring protein 8 like		GO:0000785,GO:0003677,GO:0003723,GO:0005521,GO:0005634,GO:0005737,GO:0006351,GO:0006397,GO:0007076,GO:0008380,GO:0010793,GO:0016363,GO:0016605,GO:0016607,GO:0017151,GO:0030529,GO:0031065,GO:0033127,GO:0034237,GO:0042826,GO:0044839,GO:0045944,GO:0046872,GO:0051081	chromatin|DNA binding|RNA binding|lamin binding|nucleus|cytoplasm|transcription, DNA-templated|mRNA processing|mitotic chromosome condensation|RNA splicing|regulation of mRNA export from nucleus|nuclear matrix|PML body|nuclear speck|DEAD/H-box RNA helicase binding|intracellular ribonucleoprotein complex|positive regulation of histone deacetylation|regulation of histone phosphorylation|protein kin…
AKAP9	1292.76	0.0988413	0.216304	1.01493	0.0213798	0.828751	0.972602	5.27251	4.5866	5.63185	5.60039	4.6114	5.68324	GeneID:396908,Genbank:XM_021102183.1	A-kinase anchoring protein 9
AKIP1	663.53	0.106279	-1.1654	0.91773	-0.123858	0.243856	0.745992	10.5809	9.27252	11.3427	9.00522	9.58295	10.3662	GeneID:100517841,Genbank:XM_021062257.1	A-kinase interacting protein 1
AKIRIN1	644.042	0.100193	0.268076	1.01879	0.0268592	0.788641	0.96436	44.4205	38.6817	44.0774	43.4535	42.3696	45.1942	GeneID:100144621,Genbank:NM_001128455.1	akirin 1		GO:0005634,GO:0005654,GO:0031965	nucleus|nucleoplasm|nuclear membrane
AKIRIN2	1574.89	0.0752542	-2.19595	0.891771	-0.165254	0.0280958	0.303862	40.7055	43.5386	42.4203	35.6601	40.3352	38.2274	GeneID:100519991,Genbank:XM_021074638.1	akirin 2		GO:0005634,GO:0005654,GO:0006351,GO:0009790,GO:0017053,GO:0019899,GO:0032496,GO:0032755,GO:0045087,GO:0045944	nucleus|nucleoplasm|transcription, DNA-templated|embryo development|transcriptional repressor complex|enzyme binding|response to lipopolysaccharide|positive regulation of interleukin-6 production|innate immune response|positive regulation of transcription from RNA polymerase II promoter
AKNA	123.806	0.210697	1.5515	1.25431	0.326897	0.120781	0.586141	0.836903	0.893013	0.605658	0.973351	0.999604	0.986765	GeneID:100152364,Genbank:XM_003480581.4	AT-hook transcription factor		GO:0000978,GO:0001077,GO:0001650,GO:0005654,GO:0005813,GO:0005829,GO:0016020,GO:0043231,GO:0045944	RNA polymerase II proximal promoter sequence-specific DNA binding|transcriptional activator activity, RNA polymerase II proximal promoter sequence-specific DNA binding|fibrillar center|nucleoplasm|centrosome|cytosol|membrane|intracellular membrane-bounded organelle|positive regulation of transcription from RNA polymerase II promoter
AKNAD1	7.36015	0.803703	0.852608	1.60797	0.685244	0.393877	0.851287	0.0462474	0.115146	0.110408	0.14923	0.153255	0.138767	GeneID:100519308,Genbank:XM_021090095.1	AKNA domain containing 1
AKR1A1	585.377	0.10673	1.10492	1.08518	0.117928	0.269194	0.766443	8.7553	7.57445	7.2904	8.76518	8.86768	8.28531	GeneID:396924,Genbank:XM_021093495.1	aldo-keto reductase family 1 member A1		GO:0008106	alcohol dehydrogenase (NADP+) activity	ko00930,ko00040,ko01220,ko00561,ko00010	Caprolactam degradation|Pentose and glucuronate interconversions|Degradation of aromatic compounds|Glycerolipid metabolism|Glycolysis / Gluconeogenesis
AKR1B1	1339.62	0.0753133	-0.482894	0.975106	-0.0363684	0.629171	0.934132	45.9299	45.4389	42.3745	43.4601	45.2948	43.0964	GeneID:396816,Genbank:XM_021078497.1	aldo-keto reductase family 1 member B		GO:0004032,GO:0005737	alditol:NADP+ 1-oxidoreductase activity|cytoplasm	ko00561,ko00040,ko00052,ko00051	Glycerolipid metabolism|Pentose and glucuronate interconversions|Galactose metabolism|Fructose and mannose metabolism
AKR1CL1	6.0019	0.980152	-2.05613	0.247359	-2.01532	0.0397697	0.363974	0.357718	0.496212	0.219599	0.0769518	0.158055	0.0357781	GeneID:654406,Genbank:NM_001038626.2	aldo-keto reductase family 1, member C-like 1		GO:0001516,GO:0005737,GO:0036131,GO:0047017	prostaglandin biosynthetic process|cytoplasm|prostaglandin D2 11-ketoreductase activity|prostaglandin-F synthase activity
AKR1D1	19.5374	0.512681	-0.598839	0.808314	-0.307013	0.54928	0.916609	0.172969	0.411722	0.313105	0.228977	0.264547	0.239537	GeneID:100520813,Genbank:XM_021078691.1	aldo-keto reductase family 1 member D1		GO:0004033,GO:0005496,GO:0005829,GO:0006699,GO:0006707,GO:0007586,GO:0008207,GO:0008209,GO:0030573,GO:0047787,GO:0055114,GO:0070062	aldo-keto reductase (NADP) activity|steroid binding|cytosol|bile acid biosynthetic process|cholesterol catabolic process|digestion|C21-steroid hormone metabolic process|androgen metabolic process|bile acid catabolic process|delta4-3-oxosteroid 5beta-reductase activity|oxidation-reduction process|extracellular exosome	ko00140,ko00120	Steroid hormone biosynthesis|Primary bile acid biosynthesis
AKR1E2	74.784	0.290029	-0.647944	0.877869	-0.187923	0.517021	0.907668	1.69249	2.52212	3.04534	2.13429	1.67613	2.62673	GeneID:733633,Genbank:NM_001044568.2	aldo-keto reductase family 1 member E2		GO:0005654,GO:0005794,GO:0005829,GO:0050571	nucleoplasm|Golgi apparatus|cytosol|1,5-anhydro-D-fructose reductase activity
AKR7A2	331.778	0.136886	0.129234	1.01234	0.0176904	0.897172	0.981581	15.457	13.4405	12.0338	14.9586	13.2114	13.711	GeneID:100511331,Genbank:NM_001243822.1	aldo-keto reductase family 7 member A2		GO:0004032,GO:0004033,GO:0005794,GO:0005829,GO:0005975,GO:0006081,GO:0006805,GO:0009055,GO:0019119,GO:0044597,GO:0044598,GO:0070062	alditol:NADP+ 1-oxidoreductase activity|aldo-keto reductase (NADP) activity|Golgi apparatus|cytosol|carbohydrate metabolic process|cellular aldehyde metabolic process|xenobiotic metabolic process|electron transfer activity|phenanthrene-9,10-epoxide hydrolase activity|daunorubicin metabolic process|doxorubicin metabolic process|extracellular exosome	ko00980	Metabolism of xenobiotics by cytochrome P450
AKT1S1	529.303	0.106066	0.184486	1.01366	0.0195677	0.853632	0.977976	7.27125	7.85914	6.9445	7.35829	7.36376	7.89088	GeneID:100519715,Genbank:XM_005664751.3	AKT1 substrate 1		GO:0005654,GO:0005737,GO:0005829,GO:0006469,GO:0032007,GO:0038202,GO:0042981,GO:0043234,GO:0043491,GO:0043523,GO:0045792,GO:0048011,GO:1900034	nucleoplasm|cytoplasm|cytosol|negative regulation of protein kinase activity|negative regulation of TOR signaling|TORC1 signaling|regulation of apoptotic process|protein complex|protein kinase B signaling|regulation of neuron apoptotic process|negative regulation of cell size|neurotrophin TRK receptor signaling pathway|regulation of cellular response to heat	ko04211,ko04213,ko04152,ko04150	Longevity regulating pathway|Longevity regulating pathway - multiple species|AMPK signaling pathway|mTOR signaling pathway
AKT2	1318.12	0.0813383	1.03937	1.06035	0.0845402	0.298635	0.789026	9.14061	8.81683	8.41359	9.84576	9.71766	8.70655	GeneID:100127478,Genbank:XM_013988560.2	AKT serine/threonine kinase 2				ko04066,ko04910,ko04530,ko04620,ko04922,ko04015,ko04722,ko04211,ko04611,ko04071,ko04660,ko04550,ko04914,ko04923,ko04973,ko04728,ko04668,ko04380,ko04261,ko04014,ko04151,ko04510,ko04024,ko04010,ko04725,ko04630,ko04072,ko04152,ko04370,ko04666,ko04068,ko04919,ko04022,ko04917,ko04062,ko04915,ko04212,ko04210,ko04662,ko04012,ko04920,ko04664,ko04213,ko04150	HIF-1 signaling pathway|Insulin signaling pathway|Tight junction|Toll-like receptor signaling pathway|Glucagon signaling pathway|Rap1 signaling pathway|Neurotrophin signaling pathway|Longevity regulating pathway|Platelet activation|Sphingolipid signaling pathway|T cell receptor signaling pathway|Signaling pathways regulating pluripotency of stem cells|Progesterone-mediated oocyte maturation|Regul…
AKT3	9304.33	0.0553794	-2.66144	0.902883	-0.147389	0.00778073	0.150663	68.9883	71.8591	72.8258	67.8214	63.321	63.8918	GeneID:100513811,Genbank:XM_021063994.1	AKT serine/threonine kinase 3				ko04066,ko04910,ko04530,ko04620,ko04922,ko04015,ko04722,ko04211,ko04611,ko04071,ko04660,ko04550,ko04914,ko04923,ko04973,ko04728,ko04668,ko04380,ko04261,ko04014,ko04151,ko04510,ko04024,ko04010,ko04725,ko04630,ko04072,ko04152,ko04370,ko04666,ko04068,ko04919,ko04022,ko04917,ko04062,ko04915,ko04212,ko04210,ko04662,ko04012,ko04920,ko04664,ko04213,ko04150	HIF-1 signaling pathway|Insulin signaling pathway|Tight junction|Toll-like receptor signaling pathway|Glucagon signaling pathway|Rap1 signaling pathway|Neurotrophin signaling pathway|Longevity regulating pathway|Platelet activation|Sphingolipid signaling pathway|T cell receptor signaling pathway|Signaling pathways regulating pluripotency of stem cells|Progesterone-mediated oocyte maturation|Regul…
AKTIP	1233.79	0.0800742	0.580154	1.03272	0.0464553	0.561811	0.920448	37.4024	37.2452	36.735	41.399	38.0044	36.88	GeneID:100627614,Genbank:XM_021093426.1	AKT interacting protein		GO:0001934,GO:0005829,GO:0005886,GO:0006915,GO:0007032,GO:0007040,GO:0008333,GO:0015031,GO:0030897,GO:0032092,GO:0045022,GO:0070695	positive regulation of protein phosphorylation|cytosol|plasma membrane|apoptotic process|endosome organization|lysosome organization|endosome to lysosome transport|protein transport|HOPS complex|positive regulation of protein binding|early endosome to late endosome transport|FHF complex
ALAD	328.845	0.131428	1.43012	1.13915	0.187957	0.152684	0.641855	13.1229	14.37	13.8228	14.3	17.1095	16.1805	GeneID:100621486,Genbank:XM_021067765.1	aminolevulinate dehydratase		GO:0004655,GO:0005829,GO:0006782,GO:0006783,GO:0008270,GO:0042802,GO:0051260,GO:0071353,GO:1901799	porphobilinogen synthase activity|cytosol|protoporphyrinogen IX biosynthetic process|heme biosynthetic process|zinc ion binding|identical protein binding|protein homooligomerization|cellular response to interleukin-4|negative regulation of proteasomal protein catabolic process	ko00860	Porphyrin and chlorophyll metabolism
ALAS2	59.2878	1.07418	0.82357	1.84633	0.884661	0.410184	0.860436	0.192732	2.90853	0.478898	1.36226	3.07173	2.25811	GeneID:100518817,Genbank:XM_003360338.4	5'-aminolevulinate synthase 2		GO:0001666,GO:0003870,GO:0005743,GO:0005759,GO:0006782,GO:0006879,GO:0030170,GO:0030218,GO:0042541	response to hypoxia|5-aminolevulinate synthase activity|mitochondrial inner membrane|mitochondrial matrix|protoporphyrinogen IX biosynthetic process|cellular iron ion homeostasis|pyridoxal phosphate binding|erythrocyte differentiation|hemoglobin biosynthetic process	ko00260,ko00860	Glycine, serine and threonine metabolism|Porphyrin and chlorophyll metabolism
ALB	159.767	0.181283	1.8983	1.26939	0.34413	0.0576563	0.4403	3.7945	4.19351	3.93779	5.21828	4.46086	5.61142	GeneID:396960,Genbank:NM_001005208.1	albumin		GO:0003677,GO:0005504,GO:0005615,GO:0008144,GO:0009267,GO:0015643,GO:0019836,GO:0030170,GO:0036094,GO:0043066,GO:0043234,GO:0046872,GO:0051659	DNA binding|fatty acid binding|extracellular space|drug binding|cellular response to starvation|toxic substance binding|hemolysis by symbiont of host erythrocytes|pyridoxal phosphate binding|small molecule binding|negative regulation of apoptotic process|protein complex|metal ion binding|maintenance of mitochondrion location
ALCAM	2714.74	0.0692489	0.969758	1.04765	0.0671547	0.332167	0.812995	27.686	28.8134	29.2164	30.0127	28.147	32.6286	GeneID:397269,Genbank:XM_013982482.2	activated leukocyte cell adhesion molecule		GO:0001772,GO:0002250,GO:0005887,GO:0007155,GO:0007157,GO:0030424,GO:0030425,GO:0031226,GO:0031290,GO:0048846,GO:1990138	immunological synapse|adaptive immune response|integral component of plasma membrane|cell adhesion|heterophilic cell-cell adhesion via plasma membrane cell adhesion molecules|axon|dendrite|intrinsic component of plasma membrane|retinal ganglion cell axon guidance|axon extension involved in axon guidance|neuron projection extension	ko04514	Cell adhesion molecules (CAMs)
ALDH16A1	265.697	0.146627	0.874263	1.09292	0.12819	0.381975	0.844653	2.1461	1.76089	2.23541	2.21666	2.23366	2.3402	GeneID:100514292,Genbank:XM_021094744.1	aldehyde dehydrogenase 16 family member A1		GO:0004029	aldehyde dehydrogenase (NAD) activity
ALDH18A1	1107.87	0.0782739	0.119629	1.00651	0.00936386	0.904777	0.98273	17.639	17.966	18.6102	18.3805	18.2685	18.5226	GeneID:100151977,Genbank:XM_001927529.6	aldehyde dehydrogenase 18 family member A1		GO:0004349,GO:0004350,GO:0005524,GO:0005739,GO:0005743,GO:0006536,GO:0006561,GO:0019240,GO:0055129	glutamate 5-kinase activity|glutamate-5-semialdehyde dehydrogenase activity|ATP binding|mitochondrion|mitochondrial inner membrane|glutamate metabolic process|proline biosynthetic process|citrulline biosynthetic process|L-proline biosynthetic process	ko01230,ko00330	Biosynthesis of amino acids|Arginine and proline metabolism
ALDH1A1	1385.78	0.412857	2.95355	2.32849	1.21939	0.0031414	0.0861941	13.7336	21.2823	33.037	45.781	68.4103	46.2671	GeneID:100517137,Genbank:XM_021064911.1	aldehyde dehydrogenase 1 family member A1		GO:0001523,GO:0001758,GO:0004029,GO:0005829,GO:0042572,GO:0051287,GO:0055114	retinoid metabolic process|retinal dehydrogenase activity|aldehyde dehydrogenase (NAD) activity|cytosol|retinol metabolic process|NAD binding|oxidation-reduction process	ko00830	Retinol metabolism
ALDH1A2	130.063	0.205792	-1.04383	0.861658	-0.214812	0.296564	0.787345	2.03409	1.70433	2.22085	1.62988	1.5532	2.00714	GeneID:100737077,Genbank:XM_021094606.1	aldehyde dehydrogenase 1 family member A2				ko00830	Retinol metabolism
ALDH1A3	70.6085	0.264267	0.383401	1.07275	0.10132	0.701422	0.943542	1.0915	1.01704	1.16395	1.00865	1.17171	1.36845	GeneID:102162530,Genbank:XM_021098574.1	aldehyde dehydrogenase 1 family member A3		GO:0001758,GO:0002072,GO:0002138,GO:0004029,GO:0004030,GO:0005634,GO:0005737,GO:0005829,GO:0005886,GO:0007626,GO:0021768,GO:0031076,GO:0042472,GO:0042572,GO:0042573,GO:0042574,GO:0042803,GO:0043065,GO:0048048,GO:0050885,GO:0051289,GO:0060013,GO:0060166,GO:0060324,GO:0070062,GO:0070324,GO:0070384,GO:0070403	retinal dehydrogenase activity|optic cup morphogenesis involved in camera-type eye development|retinoic acid biosynthetic process|aldehyde dehydrogenase (NAD) activity|aldehyde dehydrogenase [NAD(P)+] activity|nucleus|cytoplasm|cytosol|plasma membrane|locomotory behavior|nucleus accumbens development|embryonic camera-type eye development|inner ear morphogenesis|retinol metabolic process|retinoic …	ko00982,ko00980,ko00350,ko00410,ko00340,ko00010,ko00360	Drug metabolism - cytochrome P450|Metabolism of xenobiotics by cytochrome P450|Tyrosine metabolism|beta-Alanine metabolism|Histidine metabolism|Glycolysis / Gluconeogenesis|Phenylalanine metabolism
ALDH1B1	444.814	0.113275	-1.56976	0.884042	-0.177814	0.116472	0.578032	9.19642	10.2306	9.42931	8.88139	8.42931	8.47392	GeneID:100156278,Genbank:XM_003353586.5	aldehyde dehydrogenase 1 family member B1		GO:0004029,GO:0005654,GO:0005739,GO:0005759,GO:0005975,GO:0006068,GO:0006069,GO:0043231,GO:0051287	aldehyde dehydrogenase (NAD) activity|nucleoplasm|mitochondrion|mitochondrial matrix|carbohydrate metabolic process|ethanol catabolic process|ethanol oxidation|intracellular membrane-bounded organelle|NAD binding	ko00561,ko00071,ko00380,ko00310,ko00040,ko00410,ko00340,ko00620,ko00330,ko00903,ko00280,ko00625,ko00053,ko00010	Glycerolipid metabolism|Fatty acid degradation|Tryptophan metabolism|Lysine degradation|Pentose and glucuronate interconversions|beta-Alanine metabolism|Histidine metabolism|Pyruvate metabolism|Arginine and proline metabolism|Limonene and pinene degradation|Valine, leucine and isoleucine degradation|Chloroalkane and chloroalkene degradation|Ascorbate and aldarate metabolism|Glycolysis / Gluconeog…
ALDH1L1	515.993	0.120207	2.92629	1.27612	0.351761	0.00343035	0.0905683	9.79153	8.93863	7.29278	11.6777	10.8766	11.0059	GeneID:100622210,Genbank:XM_021098212.1	aldehyde dehydrogenase 1 family member L1		GO:0004029,GO:0005739,GO:0005829,GO:0006730,GO:0009058,GO:0009258,GO:0016155,GO:0016742	aldehyde dehydrogenase (NAD) activity|mitochondrion|cytosol|one-carbon metabolic process|biosynthetic process|10-formyltetrahydrofolate catabolic process|formyltetrahydrofolate dehydrogenase activity|hydroxymethyl-, formyl- and related transferase activity	ko00670	One carbon pool by folate
ALDH1L2	1063.77	0.095433	0.392415	1.0263	0.0374494	0.694751	0.942939	9.01661	7.48217	9.07369	9.48007	8.53818	8.51891	GeneID:100151976,Genbank:XM_001926587.6	aldehyde dehydrogenase 1 family member L2		GO:0004029,GO:0005634,GO:0005739,GO:0005759,GO:0006730,GO:0009058,GO:0009258,GO:0016155,GO:0016742,GO:0046655,GO:0070062	aldehyde dehydrogenase (NAD) activity|nucleus|mitochondrion|mitochondrial matrix|one-carbon metabolic process|biosynthetic process|10-formyltetrahydrofolate catabolic process|formyltetrahydrofolate dehydrogenase activity|hydroxymethyl-, formyl- and related transferase activity|folic acid metabolic process|extracellular exosome	ko00670	One carbon pool by folate
ALDH2	932.322	0.0901764	-1.22712	0.926166	-0.110657	0.219777	0.723285	26.2061	27.8761	28.0074	27.6905	24.7777	24.3908	GeneID:733685,Genbank:NM_001044611.2	aldehyde dehydrogenase 2 family (mitochondrial)		GO:0004029,GO:0005759,GO:0006068	aldehyde dehydrogenase (NAD) activity|mitochondrial matrix|ethanol catabolic process	ko00561,ko00071,ko00380,ko00310,ko00040,ko00410,ko00340,ko00620,ko00330,ko00903,ko00280,ko00625,ko00053,ko00010	Glycerolipid metabolism|Fatty acid degradation|Tryptophan metabolism|Lysine degradation|Pentose and glucuronate interconversions|beta-Alanine metabolism|Histidine metabolism|Pyruvate metabolism|Arginine and proline metabolism|Limonene and pinene degradation|Valine, leucine and isoleucine degradation|Chloroalkane and chloroalkene degradation|Ascorbate and aldarate metabolism|Glycolysis / Gluconeog…
ALDH3A1	13.072	0.677812	0.743937	1.41839	0.504249	0.456915	0.882914	0.137371	0.0488603	0.327951	0.197007	0.252901	0.290056	GeneID:100526075,Genbank:XM_013981363.2	aldehyde dehydrogenase 3 family member A1		GO:0004030,GO:0005737,GO:0006081	aldehyde dehydrogenase [NAD(P)+] activity|cytoplasm|cellular aldehyde metabolic process	ko00982,ko00980,ko00350,ko00410,ko00340,ko00010,ko00360	Drug metabolism - cytochrome P450|Metabolism of xenobiotics by cytochrome P450|Tyrosine metabolism|beta-Alanine metabolism|Histidine metabolism|Glycolysis / Gluconeogenesis|Phenylalanine metabolism
ALDH3A2	1536.68	0.0760772	1.2933	1.07058	0.0983905	0.195908	0.694788	23.1952	21.7696	22.8193	24.8541	25.6215	22.9067	GeneID:100525303,Genbank:XM_003132032.5	aldehyde dehydrogenase 3 family member A2		GO:0004029,GO:0004030,GO:0005789,GO:0006081,GO:0016021	aldehyde dehydrogenase (NAD) activity|aldehyde dehydrogenase [NAD(P)+] activity|endoplasmic reticulum membrane|cellular aldehyde metabolic process|integral component of membrane	ko00561,ko00071,ko00380,ko00310,ko00040,ko00410,ko00340,ko00620,ko00330,ko00903,ko00280,ko00625,ko00053,ko00010	Glycerolipid metabolism|Fatty acid degradation|Tryptophan metabolism|Lysine degradation|Pentose and glucuronate interconversions|beta-Alanine metabolism|Histidine metabolism|Pyruvate metabolism|Arginine and proline metabolism|Limonene and pinene degradation|Valine, leucine and isoleucine degradation|Chloroalkane and chloroalkene degradation|Ascorbate and aldarate metabolism|Glycolysis / Gluconeog…
ALDH3B1	34.6294	0.431417	1.34801	1.49646	0.581555	0.177655	0.679579	1.03502	0.483183	0.352994	0.858141	0.786013	1.18617	GeneID:100739347,Genbank:XM_021080126.1	aldehyde dehydrogenase 3 family member B1		GO:0004029,GO:0004030,GO:0005829,GO:0005886,GO:0006068,GO:0034599,GO:0046185	aldehyde dehydrogenase (NAD) activity|aldehyde dehydrogenase [NAD(P)+] activity|cytosol|plasma membrane|ethanol catabolic process|cellular response to oxidative stress|aldehyde catabolic process	ko00982,ko00980,ko00350,ko00410,ko00340,ko00010,ko00360	Drug metabolism - cytochrome P450|Metabolism of xenobiotics by cytochrome P450|Tyrosine metabolism|beta-Alanine metabolism|Histidine metabolism|Glycolysis / Gluconeogenesis|Phenylalanine metabolism
ALDH4A1	1049.9	0.0949832	4.07356	1.3076	0.38692	4.63e-05	0.00572156	18.5175	17.8875	16.0749	25.4973	20.9847	22.8601	GeneID:100820830,Genbank:NM_001252213.1	aldehyde dehydrogenase 4 family member A1		GO:0003842,GO:0004029,GO:0005759,GO:0006560,GO:0006562,GO:0009055,GO:0010133,GO:0019470,GO:0042802,GO:0046487	1-pyrroline-5-carboxylate dehydrogenase activity|aldehyde dehydrogenase (NAD) activity|mitochondrial matrix|proline metabolic process|proline catabolic process|electron transfer activity|proline catabolic process to glutamate|4-hydroxyproline catabolic process|identical protein binding|glyoxylate metabolic process	ko00250,ko00330	Alanine, aspartate and glutamate metabolism|Arginine and proline metabolism
ALDH5A1	1078.14	0.0876089	-2.68132	0.84974	-0.234907	0.00733325	0.145575	42.215	35.5087	37.6796	31.4298	33.7478	33.9808	GeneID:100157072,Genbank:NM_001244467.1	aldehyde dehydrogenase 5 family member A1		GO:0004777,GO:0005739,GO:0007417,GO:0009013,GO:0009450,GO:0051289,GO:0055114	succinate-semialdehyde dehydrogenase (NAD+) activity|mitochondrion|central nervous system development|succinate-semialdehyde dehydrogenase [NAD(P)+] activity|gamma-aminobutyric acid catabolic process|protein homotetramerization|oxidation-reduction process	ko00250,ko00650	Alanine, aspartate and glutamate metabolism|Butanoate metabolism
ALDH6A1	1997.67	0.0664545	4.79346	1.24707	0.318547	1.64e-06	0.00050664	21.9096	20.7376	20.6897	27.2583	26.1037	26.4877	GeneID:100153301,Genbank:XM_005656399.3	aldehyde dehydrogenase 6 family member A1		GO:0004491,GO:0005654,GO:0005739,GO:0006210,GO:0006574,GO:0018478,GO:0050873	methylmalonate-semialdehyde dehydrogenase (acylating) activity|nucleoplasm|mitochondrion|thymine catabolic process|valine catabolic process|malonate-semialdehyde dehydrogenase (acetylating) activity|brown fat cell differentiation	ko00562,ko00640,ko00410,ko00280,ko01200	Inositol phosphate metabolism|Propanoate metabolism|beta-Alanine metabolism|Valine, leucine and isoleucine degradation|Carbon metabolism
ALDH7A1	2001.58	0.0776025	1.77931	1.10044	0.138079	0.0751884	0.487731	24.9491	26.5153	22.8322	26.3383	29.6544	26.6636	GeneID:106504110,Genbank:XM_013995069.2	aldehyde dehydrogenase 7 family member A1		GO:0004043,GO:0005634,GO:0005739,GO:0005829,GO:0008802,GO:0019285	L-aminoadipate-semialdehyde dehydrogenase activity|nucleus|mitochondrion|cytosol|betaine-aldehyde dehydrogenase activity|glycine betaine biosynthetic process from choline	ko00260,ko00561,ko00071,ko00380,ko00310,ko00410,ko00340,ko00620,ko00330,ko00280,ko00300,ko01230,ko00053,ko00010	Glycine, serine and threonine metabolism|Glycerolipid metabolism|Fatty acid degradation|Tryptophan metabolism|Lysine degradation|beta-Alanine metabolism|Histidine metabolism|Pyruvate metabolism|Arginine and proline metabolism|Valine, leucine and isoleucine degradation|Lysine biosynthesis|Biosynthesis of amino acids|Ascorbate and aldarate metabolism|Glycolysis / Gluconeogenesis
ALDH9A1	1005.61	0.0882236	2.98656	1.20037	0.263485	0.00282138	0.081891	19.26	21.9862	20.66	25.6383	25.7548	23.7321	GeneID:100153809,Genbank:XM_021089487.1	aldehyde dehydrogenase 9 family member A1		GO:0004029,GO:0005737,GO:0006081,GO:0019145,GO:0042136,GO:0045329,GO:0047105,GO:0055114	aldehyde dehydrogenase (NAD) activity|cytoplasm|cellular aldehyde metabolic process|aminobutyraldehyde dehydrogenase activity|neurotransmitter biosynthetic process|carnitine biosynthetic process|4-trimethylammoniobutyraldehyde dehydrogenase activity|oxidation-reduction process	ko00561,ko00071,ko00380,ko00310,ko00410,ko00340,ko00620,ko00330,ko00280,ko00053,ko00010	Glycerolipid metabolism|Fatty acid degradation|Tryptophan metabolism|Lysine degradation|beta-Alanine metabolism|Histidine metabolism|Pyruvate metabolism|Arginine and proline metabolism|Valine, leucine and isoleucine degradation|Ascorbate and aldarate metabolism|Glycolysis / Gluconeogenesis
ALDOA	14812.4	0.0492751	-2.12575	0.929968	-0.104747	0.033524	0.333168	172.156	182.567	174.548	163.343	167.822	166.488	GeneID:110260081,Genbank:XM_021087997.1	aldolase, fructose-bisphosphate A				ko00710,ko00680,ko01200,ko01230,ko00030,ko00051,ko00010	Carbon fixation in photosynthetic organisms|Methane metabolism|Carbon metabolism|Biosynthesis of amino acids|Pentose phosphate pathway|Fructose and mannose metabolism|Glycolysis / Gluconeogenesis
ALDOC	30405.8	0.0626035	-0.776082	0.966884	-0.0485854	0.437701	0.870651	961.455	1074.07	998.532	1043.19	999.789	922.241	GeneID:100512013,Genbank:NM_001243928.1	aldolase, fructose-bisphosphate C		GO:0004332,GO:0006096,GO:0030388	fructose-bisphosphate aldolase activity|glycolytic process|fructose 1,6-bisphosphate metabolic process	ko00710,ko00680,ko01200,ko01230,ko00030,ko00051,ko00010	Carbon fixation in photosynthetic organisms|Methane metabolism|Carbon metabolism|Biosynthesis of amino acids|Pentose phosphate pathway|Fructose and mannose metabolism|Glycolysis / Gluconeogenesis
ALG1	209.466	0.161376	-0.445921	0.951344	-0.0719608	0.655654	0.937251	3.70955	3.92001	4.38214	3.50808	4.21635	3.83566	GeneID:100524193,Genbank:XM_013995667.2	ALG1, chitobiosyldiphosphodolichol beta-mannosyltransferase		GO:0004578,GO:0005789,GO:0006486,GO:0016021	chitobiosyldiphosphodolichol beta-mannosyltransferase activity|endoplasmic reticulum membrane|protein glycosylation|integral component of membrane	ko00510,ko00513	N-Glycan biosynthesis|Various types of N-glycan biosynthesis
ALG10	513.887	0.109746	-1.74986	0.875367	-0.19204	0.080143	0.502167	7.75496	8.80674	8.53442	7.09551	7.18974	7.9176	GeneID:100525643,Genbank:XM_005664001.3	ALG10, alpha-1,2-glucosyltransferase		GO:0004583,GO:0005789,GO:0006486,GO:0006488,GO:0016021,GO:0106073	dolichyl-phosphate-glucose-glycolipid alpha-glucosyltransferase activity|endoplasmic reticulum membrane|protein glycosylation|dolichol-linked oligosaccharide biosynthetic process|integral component of membrane|dolichyl pyrophosphate Glc2Man9GlcNAc2 alpha-1,2-glucosyltransferase activity	ko00510	N-Glycan biosynthesis
ALG11	528.588	0.106663	0.0510688	1.00378	0.00544718	0.959271	0.992136	4.52535	3.95826	4.19701	4.45353	4.1911	4.22593	GeneID:100152645,Genbank:XM_005668385.3	ALG11, alpha-1,2-mannosyltransferase		GO:0004377,GO:0005789,GO:0006490,GO:0016020,GO:0016021,GO:0033577	GDP-Man:Man3GlcNAc2-PP-Dol alpha-1,2-mannosyltransferase activity|endoplasmic reticulum membrane|oligosaccharide-lipid intermediate biosynthetic process|membrane|integral component of membrane|protein glycosylation in endoplasmic reticulum	ko00510,ko00513	N-Glycan biosynthesis|Various types of N-glycan biosynthesis
ALG12	276.279	0.138523	1.53953	1.15931	0.213262	0.123674	0.589818	7.52801	7.20373	6.68809	8.03944	8.10832	8.94945	GeneID:100520494,Genbank:XM_021091350.1	ALG12, alpha-1,6-mannosyltransferase		GO:0000030,GO:0005783,GO:0005789,GO:0006457,GO:0006487,GO:0006488,GO:0016020,GO:0016021,GO:0052917	mannosyltransferase activity|endoplasmic reticulum|endoplasmic reticulum membrane|protein folding|protein N-linked glycosylation|dolichol-linked oligosaccharide biosynthetic process|membrane|integral component of membrane|dol-P-Man:Man(7)GlcNAc(2)-PP-Dol alpha-1,6-mannosyltransferase activity	ko00510,ko00513	N-Glycan biosynthesis|Various types of N-glycan biosynthesis
ALG13	1187.95	0.0811004	-0.554424	0.969314	-0.044964	0.579289	0.926471	16.3123	15.2575	16.4552	15.037	15.2033	16.825	GeneID:100523348,Genbank:XM_021080435.1	ALG13, UDP-N-acetylglucosaminyltransferase subunit		GO:0003723,GO:0004577,GO:0005789,GO:0006488,GO:0036459,GO:0043541	RNA binding|N-acetylglucosaminyldiphosphodolichol N-acetylglucosaminyltransferase activity|endoplasmic reticulum membrane|dolichol-linked oligosaccharide biosynthetic process|thiol-dependent ubiquitinyl hydrolase activity|UDP-N-acetylglucosamine transferase complex	ko00510,ko00513	N-Glycan biosynthesis|Various types of N-glycan biosynthesis
ALG14	259.311	0.146584	0.602708	1.06315	0.0883472	0.546703	0.915703	0.691838	0.600816	0.689768	0.744135	0.641487	0.744992	GeneID:100157203,Genbank:XM_021090180.1	ALG14, UDP-N-acetylglucosaminyltransferase subunit		GO:0003964,GO:0004519,GO:0006310,GO:0046872	RNA-directed DNA polymerase activity|endonuclease activity|DNA recombination|metal ion binding
ALG2	493.861	0.132023	-1.96256	0.835607	-0.259103	0.0496972	0.410119	3.07637	3.95667	3.58061	2.55473	3.44003	2.97582	GeneID:100113423,Genbank:XM_013993690.2	ALG2, alpha-1,3/1,6-mannosyltransferase		GO:0000033,GO:0004378,GO:0005634,GO:0005737,GO:0005789,GO:0005829,GO:0006488,GO:0015629,GO:0016020,GO:0016021,GO:0033577,GO:0046982,GO:0047485,GO:0048306,GO:0048471,GO:0051592,GO:0102704	alpha-1,3-mannosyltransferase activity|GDP-Man:Man1GlcNAc2-PP-Dol alpha-1,3-mannosyltransferase activity|nucleus|cytoplasm|endoplasmic reticulum membrane|cytosol|dolichol-linked oligosaccharide biosynthetic process|actin cytoskeleton|membrane|integral component of membrane|protein glycosylation in endoplasmic reticulum|protein heterodimerization activity|protein N-terminus binding|calcium-depende…	ko00510,ko00513	N-Glycan biosynthesis|Various types of N-glycan biosynthesis
ALG3	120.476	0.206801	-0.589336	0.918992	-0.121875	0.555636	0.918362	4.16767	4.2509	3.60571	4.02126	3.21577	3.9232	GeneID:100627022,Genbank:XM_005670035.3	ALG3, alpha-1,3- mannosyltransferase		GO:0000033,GO:0005789,GO:0006486,GO:0006488,GO:0016021,GO:0052925	alpha-1,3-mannosyltransferase activity|endoplasmic reticulum membrane|protein glycosylation|dolichol-linked oligosaccharide biosynthetic process|integral component of membrane|dol-P-Man:Man(5)GlcNAc(2)-PP-Dol alpha-1,3-mannosyltransferase activity	ko00510,ko00513	N-Glycan biosynthesis|Various types of N-glycan biosynthesis
ALG5	290.34	0.141011	0.704009	1.07123	0.0992728	0.481427	0.893893	13.4639	14.5842	16.5932	15.1947	16.9003	16.2717	GeneID:100154411,Genbank:NM_001244320.2	ALG5, dolichyl-phosphate beta-glucosyltransferase		GO:0004576,GO:0004581,GO:0005789,GO:0006486,GO:0006487,GO:0007368,GO:0016020,GO:0016021,GO:0018279	oligosaccharyl transferase activity|dolichyl-phosphate beta-glucosyltransferase activity|endoplasmic reticulum membrane|protein glycosylation|protein N-linked glycosylation|determination of left/right symmetry|membrane|integral component of membrane|protein N-linked glycosylation via asparagine	ko00510	N-Glycan biosynthesis
ALG6	101.434	0.227823	0.539308	1.0889	0.122867	0.589674	0.928516	1.51448	1.37787	1.941	1.6804	1.77856	1.86553	GeneID:100521457,Genbank:XM_003127947.6	ALG6, alpha-1,3-glucosyltransferase		GO:0004583,GO:0005789,GO:0006487,GO:0006488,GO:0006490,GO:0016020,GO:0016021,GO:0042281,GO:0046527	dolichyl-phosphate-glucose-glycolipid alpha-glucosyltransferase activity|endoplasmic reticulum membrane|protein N-linked glycosylation|dolichol-linked oligosaccharide biosynthetic process|oligosaccharide-lipid intermediate biosynthetic process|membrane|integral component of membrane|dolichyl pyrophosphate Man9GlcNAc2 alpha-1,3-glucosyltransferase activity|glucosyltransferase activity	ko00510	N-Glycan biosynthesis
ALG8	142.789	0.203467	0.0484366	1.00685	0.00985525	0.961368	0.992919	3.66464	4.62915	3.69433	3.59387	3.66104	4.93196	GeneID:100511030,Genbank:XM_013979181.2	ALG8, alpha-1,3-glucosyltransferase		GO:0000033,GO:0004583,GO:0005789,GO:0006487,GO:0006488,GO:0006490,GO:0016021,GO:0042281	alpha-1,3-mannosyltransferase activity|dolichyl-phosphate-glucose-glycolipid alpha-glucosyltransferase activity|endoplasmic reticulum membrane|protein N-linked glycosylation|dolichol-linked oligosaccharide biosynthetic process|oligosaccharide-lipid intermediate biosynthetic process|integral component of membrane|dolichyl pyrophosphate Man9GlcNAc2 alpha-1,3-glucosyltransferase activity	ko00510	N-Glycan biosynthesis
ALG9	448.919	0.116374	-1.15077	0.911352	-0.13392	0.249826	0.750242	2.1732	2.55606	2.5166	2.2206	2.17684	2.27732	GeneID:100519965,Genbank:XM_021102094.1	ALG9, alpha-1,2-mannosyltransferase		GO:0000026,GO:0000030,GO:0005783,GO:0005789,GO:0006486,GO:0006488,GO:0016020,GO:0016021,GO:0052918,GO:0052926	alpha-1,2-mannosyltransferase activity|mannosyltransferase activity|endoplasmic reticulum|endoplasmic reticulum membrane|protein glycosylation|dolichol-linked oligosaccharide biosynthetic process|membrane|integral component of membrane|dol-P-Man:Man(8)GlcNAc(2)-PP-Dol alpha-1,2-mannosyltransferase activity|dol-P-Man:Man(6)GlcNAc(2)-PP-Dol alpha-1,2-mannosyltransferase activity	ko00510,ko00513	N-Glycan biosynthesis|Various types of N-glycan biosynthesis
ALK	189.463	0.176251	0.19046	1.02354	0.0335686	0.848949	0.977948	1.39273	1.27092	1.0252	1.24721	1.14859	1.41818	GeneID:100518423,Genbank:XM_021087669.1	ALK receptor tyrosine kinase
ALKAL2	19.2299	0.505595	-0.13284	0.954513	-0.0671632	0.89432	0.981475	0.360563	0.200732	0.400988	0.286649	0.34633	0.297908	GeneID:100516260,Genbank:XM_021087957.1	ALK and LTK ligand 2		GO:0005576,GO:0010976,GO:0030298,GO:0030971,GO:0070374,GO:0070378	extracellular region|positive regulation of neuron projection development|receptor signaling protein tyrosine kinase activator activity|receptor tyrosine kinase binding|positive regulation of ERK1 and ERK2 cascade|positive regulation of ERK5 cascade
ALKBH1	157.637	0.183505	0.462229	1.06056	0.0848215	0.643917	0.936207	1.77065	1.85326	1.76548	2.20776	1.70671	1.8612	GeneID:100623752,Genbank:XM_021099556.1	alkB homolog 1, histone H2A dioxygenase		GO:0000049,GO:0001701,GO:0001764,GO:0001890,GO:0002101,GO:0003906,GO:0005719,GO:0005739,GO:0006281,GO:0006307,GO:0006446,GO:0006448,GO:0008198,GO:0016706,GO:0031175,GO:0035552,GO:0042056,GO:0042245,GO:0043524,GO:0043734,GO:0048589,GO:0070129,GO:0070579,GO:0070989,GO:0080111,GO:0103053,GO:0140078,GO:0140080,GO:1990983,GO:1990984	tRNA binding|in utero embryonic development|neuron migration|placenta development|tRNA wobble cytosine modification|DNA-(apurinic or apyrimidinic site) lyase activity|nuclear euchromatin|mitochondrion|DNA repair|DNA dealkylation involved in DNA repair|regulation of translational initiation|regulation of translational elongation|ferrous iron binding|oxidoreductase activity, acting on paired donors…
ALKBH2	120.441	0.214488	1.16093	1.18839	0.249005	0.245671	0.747122	1.29245	1.69052	1.7916	2.06281	1.96494	1.70967	GeneID:100520333,Genbank:XM_005670740.3	alkB homolog 2, alpha-ketoglutarate dependent dioxygenase		GO:0005634,GO:0006307,GO:0008198,GO:0035511,GO:0043734,GO:0051747,GO:0103053	nucleus|DNA dealkylation involved in DNA repair|ferrous iron binding|oxidative DNA demethylation|DNA-N1-methyladenine dioxygenase activity|cytosine C-5 DNA demethylase activity|1-ethyladenine demethylase activity
ALKBH3	316.543	0.159863	-2.21778	0.782119	-0.354541	0.0265698	0.298536	5.24749	3.96995	4.2282	4.31458	3.19939	3.1151	GeneID:100624169,Genbank:XM_021083167.1	alkB homolog 3, alpha-ketoglutaratedependent dioxygenase
ALKBH4	237.097	0.15718	0.819147	1.09335	0.128754	0.412703	0.861022	3.71831	2.85789	3.49828	3.96874	3.6981	3.47673	GeneID:100520070,Genbank:XM_003480995.4	alkB homolog 4, lysine demethylase		GO:0003779,GO:0005634,GO:0005737,GO:0006351,GO:0006355,GO:0006482,GO:0016706,GO:0030496,GO:0031032,GO:0032451,GO:0036090,GO:0046872,GO:0070938	actin binding|nucleus|cytoplasm|transcription, DNA-templated|regulation of transcription, DNA-templated|protein demethylation|oxidoreductase activity, acting on paired donors, with incorporation or reduction of molecular oxygen, 2-oxoglutarate as one donor, and incorporation of one atom each of oxygen into both donors|midbody|actomyosin structure organization|demethylase activity|cleavage furrow …
ALKBH5	928.548	0.0831751	-0.671138	0.962046	-0.055822	0.502133	0.903069	16.0821	16.4866	16.5393	16.2792	15.7823	15.7027	GeneID:100622998,Genbank:XM_021067995.1	alkB homolog 5, RNA demethylase		GO:0001666,GO:0005634,GO:0005794,GO:0005829,GO:0006397,GO:0006406,GO:0007283,GO:0016607,GO:0016706,GO:0030154,GO:0035515,GO:0035553,GO:0046872	response to hypoxia|nucleus|Golgi apparatus|cytosol|mRNA processing|mRNA export from nucleus|spermatogenesis|nuclear speck|oxidoreductase activity, acting on paired donors, with incorporation or reduction of molecular oxygen, 2-oxoglutarate as one donor, and incorporation of one atom each of oxygen into both donors|cell differentiation|oxidative RNA demethylase activity|oxidative single-stranded …
ALKBH6	438.512	0.11588	0.707542	1.05848	0.0819901	0.47923	0.892863	22.8601	21.2228	22.9256	21.7719	24.4171	25.5333	GeneID:100523906,Genbank:XM_003127080.6	alkB homolog 6		GO:0005634,GO:0005654,GO:0005737,GO:0005925,GO:0008198,GO:0051213	nucleus|nucleoplasm|cytoplasm|focal adhesion|ferrous iron binding|dioxygenase activity
ALKBH7	211.727	0.164385	-1.15063	0.877124	-0.189147	0.249884	0.750242	15.081	14.4705	11.6623	11.8829	11.364	13.2713	GeneID:100517144,Genbank:XM_013994719.2	alkB homolog 7		GO:0005759,GO:0006631,GO:0006974,GO:0010883,GO:0046872,GO:0051213,GO:1902445	mitochondrial matrix|fatty acid metabolic process|cellular response to DNA damage stimulus|regulation of lipid storage|metal ion binding|dioxygenase activity|regulation of mitochondrial membrane permeability involved in programmed necrotic cell death
ALKBH8	152.718	0.184848	-0.33847	0.95756	-0.0625657	0.735009	0.952692	3.45603	3.08354	2.97666	2.6882	3.36462	3.1637	GeneID:100626321,Genbank:XM_003357273.3	alkB homolog 8, tRNA methyltransferase		GO:0000049,GO:0002098,GO:0005506,GO:0005634,GO:0005737,GO:0005829,GO:0006974,GO:0008198,GO:0008270,GO:0016300,GO:0016604,GO:0016706,GO:0030488,GO:0055114	tRNA binding|tRNA wobble uridine modification|iron ion binding|nucleus|cytoplasm|cytosol|cellular response to DNA damage stimulus|ferrous iron binding|zinc ion binding|tRNA (uracil) methyltransferase activity|nuclear body|oxidoreductase activity, acting on paired donors, with incorporation or reduction of molecular oxygen, 2-oxoglutarate as one donor, and incorporation of one atom each of oxygen …
ALMS1	498.159	0.119649	0.75665	1.06476	0.0905323	0.44926	0.877922	1.81403	2.24175	2.3006	2.36407	2.19484	2.2827	GeneID:100516187,Genbank:XM_013996028.2	ALMS1, centrosome and basal body associated protein		GO:0000086,GO:0000922,GO:0005813,GO:0005829,GO:0005929,GO:0010389,GO:0016197,GO:0051393,GO:0051492,GO:0097711	G2/M transition of mitotic cell cycle|spindle pole|centrosome|cytosol|cilium|regulation of G2/M transition of mitotic cell cycle|endosomal transport|alpha-actinin binding|regulation of stress fiber assembly|ciliary basal body-plasma membrane docking
ALOX12	12.0754	0.632131	-1.04256	0.633303	-0.659033	0.297154	0.787447	0.372163	0.292611	0.240491	0.126409	0.238001	0.2155	GeneID:100620614,Genbank:XM_003483092.4	arachidonate 12-lipoxygenase, 12S type				ko04726,ko04750,ko00590	Serotonergic synapse|Inflammatory mediator regulation of TRP channels|Arachidonic acid metabolism
ALOX15	122.162	0.222449	-2.25177	0.706664	-0.500904	0.0243369	0.285628	1.9584	1.98134	2.53805	1.71635	1.71458	1.20426	GeneID:396971,Genbank:NM_213931.1	arachidonate 15-lipoxygenase		GO:0001503,GO:0002820,GO:0004052,GO:0005506,GO:0005546,GO:0005811,GO:0005829,GO:0005886,GO:0006646,GO:0010811,GO:0016020,GO:0019369,GO:0019372,GO:0030282,GO:0030838,GO:0031234,GO:0034976,GO:0035358,GO:0035963,GO:0042060,GO:0043277,GO:0043651,GO:0050473,GO:0070374,GO:0071277,GO:1901074,GO:2001303	ossification|negative regulation of adaptive immune response|arachidonate 12-lipoxygenase activity|iron ion binding|phosphatidylinositol-4,5-bisphosphate binding|lipid droplet|cytosol|plasma membrane|phosphatidylethanolamine biosynthetic process|positive regulation of cell-substrate adhesion|membrane|arachidonic acid metabolic process|lipoxygenase pathway|bone mineralization|positive regulation o…	ko04726,ko00591,ko00590	Serotonergic synapse|Linoleic acid metabolism|Arachidonic acid metabolism
ALOX5	118.998	0.243858	-1.58733	0.764675	-0.387082	0.112439	0.571661	4.06392	2.13449	2.67146	2.28748	2.51199	2.06391	GeneID:100156205,Genbank:XM_021072736.1	arachidonate 5-lipoxygenase				ko04726,ko00590,ko04913	Serotonergic synapse|Arachidonic acid metabolism|Ovarian steroidogenesis
ALOX5AP	401.988	0.151037	-0.177568	0.981582	-0.0268193	0.859062	0.978743	3.44161	4.42079	3.98056	4.29525	4.40078	3.0587	GeneID:397392,Genbank:XM_021065157.1	arachidonate 5-lipoxygenase activating protein		GO:0005635,GO:0005783,GO:0005789,GO:0008047,GO:0016021,GO:0019370,GO:0031965,GO:0050544	nuclear envelope|endoplasmic reticulum|endoplasmic reticulum membrane|enzyme activator activity|integral component of membrane|leukotriene biosynthetic process|nuclear membrane|arachidonic acid binding
ALOXE3	9.79063	0.697977	0.0901914	1.0446	0.0629515	0.928135	0.98569	0.170311	0.218075	0.121977	0.219822	0.112875	0.204409	GeneID:100511043,Genbank:XM_021067857.1	arachidonate lipoxygenase 3
ALPK1	25.0243	0.454521	0.440656	1.14893	0.200288	0.659462	0.937272	0.356816	0.223191	0.31472	0.224979	0.434913	0.38149	GeneID:100514116,Genbank:XM_003129245.6	alpha kinase 1		GO:0004674,GO:0005524,GO:0005737	protein serine/threonine kinase activity|ATP binding|cytoplasm
ALPK2	29.3761	0.405188	-0.380507	0.898645	-0.154177	0.703569	0.944364	0.196247	0.17634	0.126814	0.133314	0.165433	0.154959	GeneID:100152584,Genbank:XM_001925970.7	alpha kinase 2		GO:0004674,GO:0005524,GO:0005737	protein serine/threonine kinase activity|ATP binding|cytoplasm
ALPK3	124.755	0.247279	-1.135	0.823214	-0.28066	0.256377	0.754586	1.31348	1.19868	1.18474	1.20829	0.601347	1.26185	GeneID:110261548,Genbank:XM_021098900.1	alpha kinase 3		GO:0004674,GO:0005524,GO:0005634,GO:0007507	protein serine/threonine kinase activity|ATP binding|nucleus|heart development
ALPL	676.045	0.118386	-0.691437	0.944841	-0.0818564	0.489291	0.897545	11.529	14.8386	12.4359	11.3431	14.0578	11.674	GeneID:100170147,Genbank:XM_021097682.1	alkaline phosphatase, liver/bone/kidney		GO:0001958,GO:0003006,GO:0004035,GO:0005578,GO:0005886,GO:0016462,GO:0031214,GO:0031225,GO:0033280,GO:0046677,GO:0046872,GO:0065010,GO:0071407	endochondral ossification|developmental process involved in reproduction|alkaline phosphatase activity|proteinaceous extracellular matrix|plasma membrane|pyrophosphatase activity|biomineral tissue development|anchored component of membrane|response to vitamin D|response to antibiotic|metal ion binding|extracellular membrane-bounded organelle|cellular response to organic cyclic compound	ko02020,ko00627,ko00790	Two-component system|Aminobenzoate degradation|Folate biosynthesis
ALS2	1429.13	0.0756952	-1.68017	0.915619	-0.127181	0.092924	0.532752	8.18635	7.29352	7.75352	7.31977	7.03258	7.15558	GeneID:100626864,Genbank:XM_021076185.1	ALS2, alsin Rho guanine nucleotide exchange factor
ALS2CL	102.109	0.233482	-0.183044	0.970811	-0.0427374	0.854764	0.977976	1.47741	2.21744	1.56144	1.64147	1.77542	1.73747	GeneID:102164483,Genbank:XM_021068644.1	ALS2 C-terminal like		GO:0005096,GO:0005737	GTPase activator activity|cytoplasm
ALS2CR12	16.191	0.560563	1.88163	2.07739	1.05477	0.0598861	0.446078	0.193489	0.185815	0.257358	0.353796	0.363339	0.619273	GeneID:100625172,Genbank:XM_013982308.2	amyotrophic lateral sclerosis 2 chromosome region 12		GO:0001520,GO:0005737,GO:0035686,GO:0036126	outer dense fiber|cytoplasm|sperm fibrous sheath|sperm flagellum
ALX1	8.52216	0.79689	0.854917	1.60356	0.681275	0.392597	0.851287	0.107341	0.0715863	0.0960978	0.158751	0.0444636	0.24156	GeneID:100525700,Genbank:XM_003126740.5	ALX homeobox 1	Homeobox
ALX3	15.3712	0.553266	-1.28369	0.611226	-0.710221	0.199251	0.70087	0.503901	0.464364	0.398391	0.24636	0.253005	0.343629	GeneID:100512714,Genbank:XM_021090054.1	ALX homeobox 3		GO:0005634,GO:0006351,GO:0006355,GO:0007389,GO:0035115,GO:0035116,GO:0042981,GO:0043565,GO:0048701	nucleus|transcription, DNA-templated|regulation of transcription, DNA-templated|pattern specification process|embryonic forelimb morphogenesis|embryonic hindlimb morphogenesis|regulation of apoptotic process|sequence-specific DNA binding|embryonic cranial skeleton morphogenesis
ALX4	12.8379	0.617843	-0.252001	0.897698	-0.155697	0.80104	0.967588	0.184538	0.185328	0.0888516	0.140109	0.167869	0.108571	GeneID:100738855,Genbank:XM_021083157.1	ALX homeobox 4		GO:0003700,GO:0005634,GO:0006351,GO:0006357,GO:0007275,GO:0043565	DNA binding transcription factor activity|nucleus|transcription, DNA-templated|regulation of transcription from RNA polymerase II promoter|multicellular organism development|sequence-specific DNA binding
ALYREF	479.905	0.107178	0.598649	1.04548	0.0641619	0.549407	0.916609	22.3012	23.4971	22.7218	23.3836	24.5824	24.4561	GeneID:100620496,Genbank:XM_021066430.1	Aly/REF export factor		GO:0003697,GO:0003723,GO:0005634,GO:0005681,GO:0005737,GO:0006397,GO:0008380,GO:0016607,GO:0051028	single-stranded DNA binding|RNA binding|nucleus|spliceosomal complex|cytoplasm|mRNA processing|RNA splicing|nuclear speck|mRNA transport	ko03040,ko03015,ko03013	Spliceosome|mRNA surveillance pathway|RNA transport
AMACR	236.662	0.148401	0.467964	1.04931	0.0694463	0.63981	0.935432	7.80263	8.54778	8.65738	9.13844	9.00187	8.39363	GeneID:100512020,Genbank:XM_003133873.4	alpha-methylacyl-CoA racemase		GO:0005102,GO:0005737,GO:0005739,GO:0005777,GO:0005782,GO:0005886,GO:0006699,GO:0008111,GO:0008206,GO:0033540,GO:0043231	receptor binding|cytoplasm|mitochondrion|peroxisome|peroxisomal matrix|plasma membrane|bile acid biosynthetic process|alpha-methylacyl-CoA racemase activity|bile acid metabolic process|fatty acid beta-oxidation using acyl-CoA oxidase|intracellular membrane-bounded organelle	ko04146,ko00120	Peroxisome|Primary bile acid biosynthesis
AMBN	14.9873	0.601181	-0.167827	0.932455	-0.100894	0.866719	0.979791	0.495294	0.528501	0.387521	0.188024	0.708015	0.4371	GeneID:397102,Genbank:NM_214037.1	ameloblastin		GO:0005578,GO:0030345,GO:0031214,GO:0042475	proteinaceous extracellular matrix|structural constituent of tooth enamel|biomineral tissue development|odontogenesis of dentin-containing tooth
AMBRA1	845.883	0.0916464	-0.301724	0.981016	-0.027652	0.762862	0.960673	7.72949	8.50665	7.74288	7.67574	7.58494	8.51291	GeneID:100519700,Genbank:XM_021085242.1	autophagy and beclin 1 regulator 1		GO:0000045,GO:0000422,GO:0000423,GO:0005737,GO:0005739,GO:0005741,GO:0005776,GO:0005829,GO:0005930,GO:0008285,GO:0009267,GO:0010508,GO:0010667,GO:0016236,GO:0021915,GO:0030154,GO:0031625,GO:0043524,GO:0043552,GO:0045335,GO:0048471,GO:0051020,GO:0098780	autophagosome assembly|autophagy of mitochondrion|mitophagy|cytoplasm|mitochondrion|mitochondrial outer membrane|autophagosome|cytosol|axoneme|negative regulation of cell proliferation|cellular response to starvation|positive regulation of autophagy|negative regulation of cardiac muscle cell apoptotic process|macroautophagy|neural tube development|cell differentiation|ubiquitin protein ligase bin…
AMCF-II	1.54014	2.26471	-0.797596	0.285919	-1.80632	0.425105	0.865924	0	0.278855	0	0.080311	0	0	GeneID:396900,Genbank:NM_213876.1	alveolar macrophage-derived chemotactic factor-II		GO:0002446,GO:0005615,GO:0006954,GO:0006955,GO:0007186,GO:0008009,GO:0032496,GO:0042127,GO:0045236,GO:0070098,GO:0090023	neutrophil mediated immunity|extracellular space|inflammatory response|immune response|G-protein coupled receptor signaling pathway|chemokine activity|response to lipopolysaccharide|regulation of cell proliferation|CXCR chemokine receptor binding|chemokine-mediated signaling pathway|positive regulation of neutrophil chemotaxis	ko04060,ko04062	Cytokine-cytokine receptor interaction|Chemokine signaling pathway
AMD1	3645.81	0.0693895	-1.94851	0.91054	-0.135206	0.0513538	0.414219	57.6012	59.7199	62.9429	59.6126	53.6682	52.649	GeneID:100155925,Genbank:XM_003121345.6	adenosylmethionine decarboxylase 1		GO:0004014,GO:0005829,GO:0006557,GO:0006597,GO:0008295,GO:0019810	adenosylmethionine decarboxylase activity|cytosol|S-adenosylmethioninamine biosynthetic process|spermine biosynthetic process|spermidine biosynthetic process|putrescine binding	ko00330,ko00270	Arginine and proline metabolism|Cysteine and methionine metabolism
AMDHD1	28.9163	0.525949	-0.605008	0.802068	-0.318203	0.545174	0.91511	1.47122	0.410578	0.393687	0.486902	0.450031	0.905523	GeneID:100151804,Genbank:XM_021092739.1	amidohydrolase domain containing 1		GO:0005737,GO:0019556,GO:0019557,GO:0046872,GO:0050480	cytoplasm|histidine catabolic process to glutamate and formamide|histidine catabolic process to glutamate and formate|metal ion binding|imidazolonepropionase activity	ko00340	Histidine metabolism
AMDHD2	511.21	0.12207	1.51168	1.13645	0.184531	0.130614	0.603051	14.999	12.8398	14.3635	18.3507	15.8503	14.2953	GeneID:100518775,Genbank:XM_013987849.2	amidohydrolase domain containing 2		GO:0005634,GO:0005975,GO:0006046,GO:0008448,GO:0019262,GO:0046872	nucleus|carbohydrate metabolic process|N-acetylglucosamine catabolic process|N-acetylglucosamine-6-phosphate deacetylase activity|N-acetylneuraminate catabolic process|metal ion binding	ko00520	Amino sugar and nucleotide sugar metabolism
AMER1	508.619	0.106141	0.566602	1.04257	0.0601396	0.570984	0.923251	2.48339	2.65517	2.55606	2.80946	2.61748	2.68174	GeneID:100512031,Genbank:XM_013990913.2	APC membrane recruitment protein 1
AMER2	1932.22	0.0871442	0.669536	1.04127	0.0583462	0.503153	0.903372	11.1652	9.73641	11.6093	11.7016	12.2541	10.276	GeneID:100624576,Genbank:XM_021065474.1	APC membrane recruitment protein 2		GO:0005546,GO:0005886,GO:0007398,GO:0008013,GO:0016055,GO:0048856,GO:0060828,GO:0090090	phosphatidylinositol-4,5-bisphosphate binding|plasma membrane|ectoderm development|beta-catenin binding|Wnt signaling pathway|anatomical structure development|regulation of canonical Wnt signaling pathway|negative regulation of canonical Wnt signaling pathway
AMER3	1028.7	0.0817714	-2.59879	0.863036	-0.212507	0.0093553	0.169106	8.69037	8.39605	9.15624	7.66117	7.59883	7.64155	GeneID:102162819,Genbank:XM_005672379.3	APC membrane recruitment protein 3		GO:0005546,GO:0005886,GO:0008013,GO:0016055,GO:0048856,GO:0060828	phosphatidylinositol-4,5-bisphosphate binding|plasma membrane|beta-catenin binding|Wnt signaling pathway|anatomical structure development|regulation of canonical Wnt signaling pathway
AMFR	2985.72	0.0632267	-0.331424	0.98558	-0.0209548	0.740325	0.954831	25.5757	27.2369	25.6973	24.7221	26.3768	27.135	GeneID:100516197,Genbank:XM_021097092.1	autocrine motility factor receptor				ko04141	Protein processing in endoplasmic reticulum
AMH	4.40288	1.11271	0.497326	1.46752	0.553379	0.61896	0.931461	0.204588	0.0623727	0.0598067	0.0314361	0.16142	0.292319	GeneID:397578,Genbank:NM_214310.2	anti-Mullerian hormone		GO:0001655,GO:0001880,GO:0005179,GO:0005615,GO:0007267,GO:0007506,GO:0008083,GO:0030154	urogenital system development|Mullerian duct regression|hormone activity|extracellular space|cell-cell signaling|gonadal mesoderm development|growth factor activity|cell differentiation	ko04060,ko04024,ko04390,ko04350	Cytokine-cytokine receptor interaction|cAMP signaling pathway|Hippo signaling pathway|TGF-beta signaling pathway
AMHR2	2.52711	1.42063	0.147963	1.15685	0.2102	0.882372	0.980832	0.0358757	0.0957025	0	0.0578814	0.0594426	0.035882	GeneID:100154297,Genbank:XM_021090944.1	anti-Mullerian hormone receptor type 2				ko04060,ko04350	Cytokine-cytokine receptor interaction|TGF-beta signaling pathway
AMIGO1	2036.16	0.0713	-2.38415	0.888849	-0.16999	0.0171186	0.239843	10.5677	11.6658	11.4417	10.2262	9.61807	10.4145	GeneID:100514767,Genbank:XM_005663589.3	adhesion molecule with Ig like domain 1		GO:0007156,GO:0007157,GO:0007409,GO:0007413,GO:0008076,GO:0015459,GO:0030424,GO:0030425,GO:0032809,GO:0042552,GO:0043204,GO:0050772,GO:0051965,GO:1901381	homophilic cell adhesion via plasma membrane adhesion molecules|heterophilic cell-cell adhesion via plasma membrane cell adhesion molecules|axonogenesis|axonal fasciculation|voltage-gated potassium channel complex|potassium channel regulator activity|axon|dendrite|neuronal cell body membrane|myelination|perikaryon|positive regulation of axonogenesis|positive regulation of synapse assembly|positiv…
AMIGO2	360.797	0.125604	0.876817	1.07933	0.110131	0.380586	0.844069	6.00229	6.42291	6.05399	6.29095	7.36474	6.51499	GeneID:100152349,Genbank:XM_005664161.3	adhesion molecule with Ig like domain 2		GO:0005634,GO:0005886,GO:0007156,GO:0007157,GO:0016021,GO:0043066,GO:0043069,GO:0051965	nucleus|plasma membrane|homophilic cell adhesion via plasma membrane adhesion molecules|heterophilic cell-cell adhesion via plasma membrane cell adhesion molecules|integral component of membrane|negative regulation of apoptotic process|negative regulation of programmed cell death|positive regulation of synapse assembly
AMMECR1	85.3293	0.239236	0.768372	1.13589	0.183822	0.442266	0.874176	0.975788	0.780907	0.77998	0.951154	0.976809	0.986124	GeneID:100520351,Genbank:XM_003135311.6	Alport syndrome, mental retardation, midface hypoplasia and elliptocytosis chromosomal region gene 1		GO:0005634	nucleus
AMMECR1L	509.285	0.114126	0.175108	1.01395	0.0199844	0.860995	0.97941	4.55372	4.93168	3.96243	4.76977	4.53175	4.4779	GeneID:100625170,Genbank:XM_021076490.1	AMMECR1 like
AMN1	1169.01	0.0850003	-1.61023	0.90949	-0.13687	0.107347	0.564567	21.4004	20.7626	23.5665	20.1339	19.0061	21.301	GeneID:110260713,Genbank:XM_021092088.1	antagonist of mitotic exit network 1 homolog
AMOT	1477.47	0.0997055	2.2314	1.16674	0.222483	0.0256548	0.294088	4.37415	4.85971	4.71677	5.83255	6.04415	4.5781	GeneID:100158213,Genbank:XM_021080791.1	angiomotin				ko04390	Hippo signaling pathway
AMOTL1	1441.58	0.0863513	1.47856	1.09253	0.127675	0.139259	0.621107	9.25502	9.77009	9.31423	10.6702	11.3582	9.2764	GeneID:100513610,Genbank:XM_005667237.3	angiomotin like 1		GO:0003365,GO:0005829,GO:0005923,GO:0016055,GO:0016324,GO:0030027,GO:0031410,GO:0035329,GO:0042802,GO:0043536	establishment of cell polarity involved in ameboidal cell migration|cytosol|bicellular tight junction|Wnt signaling pathway|apical plasma membrane|lamellipodium|cytoplasmic vesicle|hippo signaling|identical protein binding|positive regulation of blood vessel endothelial cell migration	ko04530	Tight junction
AMOTL2	389.395	0.134568	0.537509	1.05141	0.0723317	0.590916	0.928929	5.51878	5.40497	4.44034	6.1589	4.97988	5.18286	GeneID:100523696,Genbank:XM_021069473.1	angiomotin like 2		GO:0016055,GO:0055037	Wnt signaling pathway|recycling endosome
AMPD2	1536.06	0.0730524	-0.71646	0.964371	-0.0523391	0.473707	0.890469	19.3994	18.8907	19.6179	19.3608	19.1626	17.944	GeneID:110260356,Genbank:XM_021090067.1	adenosine monophosphate deaminase 2		GO:0003876,GO:0005829,GO:0006188,GO:0032264,GO:0043101,GO:0046872,GO:0052652,GO:0097009	AMP deaminase activity|cytosol|IMP biosynthetic process|IMP salvage|purine-containing compound salvage|metal ion binding|cyclic purine nucleotide metabolic process|energy homeostasis	ko00230	Purine metabolism
AMPD3	301.51	0.141339	-0.129785	0.987366	-0.0183436	0.896737	0.981581	1.83553	1.4459	1.83382	1.71297	1.64587	1.74945	GeneID:100620914,Genbank:XM_013994571.2	adenosine monophosphate deaminase 3		GO:0003876,GO:0005576,GO:0005829,GO:0006196,GO:0032264,GO:0034101,GO:0034774,GO:0043101,GO:0043312,GO:0046031,GO:0046034,GO:0046039,GO:0046872,GO:0097009,GO:1904813	AMP deaminase activity|extracellular region|cytosol|AMP catabolic process|IMP salvage|erythrocyte homeostasis|secretory granule lumen|purine-containing compound salvage|neutrophil degranulation|ADP metabolic process|ATP metabolic process|GTP metabolic process|metal ion binding|energy homeostasis|ficolin-1-rich granule lumen	ko00230	Purine metabolism
AMPH	2767.4	0.062825	-2.87554	0.882302	-0.180656	0.00403331	0.0994882	72.3099	74.0033	76.1902	66.9592	67.4804	64.0577	GeneID:100626324,Genbank:NM_001244203.1	amphiphysin		GO:0005543,GO:0005829,GO:0006897,GO:0007268,GO:0008021,GO:0015629,GO:0030054,GO:0030672,GO:0031256,GO:0061024	phospholipid binding|cytosol|endocytosis|chemical synaptic transmission|synaptic vesicle|actin cytoskeleton|cell junction|synaptic vesicle membrane|leading edge membrane|membrane organization	ko04666,ko04144	Fc gamma R-mediated phagocytosis|Endocytosis
AMT	270.587	0.146471	0.100759	1.01028	0.0147583	0.919742	0.98418	6.69088	7.36977	6.10965	7.4546	6.1987	6.9319	GeneID:396679,Genbank:XM_021068508.1	aminomethyltransferase		GO:0004047,GO:0005654,GO:0005739,GO:0005759,GO:0006546,GO:0008483,GO:0019464	aminomethyltransferase activity|nucleoplasm|mitochondrion|mitochondrial matrix|glycine catabolic process|transaminase activity|glycine decarboxylation via glycine cleavage system	ko00260,ko00670,ko00630,ko01200	Glycine, serine and threonine metabolism|One carbon pool by folate|Glyoxylate and dicarboxylate metabolism|Carbon metabolism
AMY2	8.29239	0.875394	-0.188628	0.891852	-0.165124	0.850384	0.977948	0.483597	0.129005	0.049479	0.208061	0.2938	0.0967362	GeneID:397397,Genbank:XM_021088711.1	amylase, alpha 2B (pancreatic)				ko04973,ko00500	Carbohydrate digestion and absorption|Starch and sucrose metabolism
AMZ1	186.088	0.167745	0.248851	1.02936	0.0417434	0.803476	0.968012	7.76098	6.81525	6.68684	7.62871	7.75244	6.75955	GeneID:100337670,Genbank:NM_001195325.1	archaelysin family metallopeptidase 1		GO:0006508,GO:0008233,GO:0008237,GO:0008270	proteolysis|peptidase activity|metallopeptidase activity|zinc ion binding
AMZ2	899.132	0.0923187	-0.446237	0.971849	-0.0411961	0.655426	0.937251	34.5413	30.5911	28.86	29.3103	31.2305	31.8086	GeneID:100626953,Genbank:XM_021066162.1	archaelysin family metallopeptidase 2		GO:0008237,GO:0008270	metallopeptidase activity|zinc ion binding
ANAPC1	590.751	0.110489	0.175684	1.01355	0.0194111	0.860542	0.979286	3.03649	2.5911	2.632	2.84929	2.54296	3.06856	GeneID:100519830,Genbank:XM_021087035.1	anaphase promoting complex subunit 1		GO:0005654,GO:0005680,GO:0005829,GO:0031145,GO:0042787,GO:0043161,GO:0051301,GO:0051436,GO:0051437,GO:0051439,GO:0070979	nucleoplasm|anaphase-promoting complex|cytosol|anaphase-promoting complex-dependent catabolic process|protein ubiquitination involved in ubiquitin-dependent protein catabolic process|proteasome-mediated ubiquitin-dependent protein catabolic process|cell division|negative regulation of ubiquitin-protein ligase activity involved in mitotic cell cycle|positive regulation of ubiquitin-protein ligase …	ko04914,ko04114,ko04110,ko04120,ko04111,ko04113	Progesterone-mediated oocyte maturation|Oocyte meiosis|Cell cycle|Ubiquitin mediated proteolysis|Cell cycle - yeast|Meiosis - yeast
ANAPC10	75.0518	0.258853	0.163701	1.02981	0.0423746	0.869966	0.980673	0.558097	0.603351	0.533449	0.616082	0.665145	0.484748	GeneID:100415930,Genbank:XM_021100318.1	anaphase promoting complex subunit 10				ko04914,ko04114,ko04110,ko04120,ko04111,ko04113	Progesterone-mediated oocyte maturation|Oocyte meiosis|Cell cycle|Ubiquitin mediated proteolysis|Cell cycle - yeast|Meiosis - yeast
ANAPC11	426.932	0.124804	-0.882307	0.926514	-0.110115	0.377611	0.841635	48.6044	43.0639	42.6819	36.4175	42.7579	46.6722	GeneID:100620851,Genbank:XM_021066434.1	anaphase promoting complex subunit 11		GO:0000278,GO:0005654,GO:0005680,GO:0005730,GO:0005829,GO:0016567,GO:0031145,GO:0034450,GO:0042787,GO:0043161,GO:0045842,GO:0046872,GO:0051301,GO:0051436,GO:0051437,GO:0051439,GO:0061630,GO:0070979,GO:0097602	mitotic cell cycle|nucleoplasm|anaphase-promoting complex|nucleolus|cytosol|protein ubiquitination|anaphase-promoting complex-dependent catabolic process|ubiquitin-ubiquitin ligase activity|protein ubiquitination involved in ubiquitin-dependent protein catabolic process|proteasome-mediated ubiquitin-dependent protein catabolic process|positive regulation of mitotic metaphase/anaphase transition|m…	ko04914,ko04114,ko04110,ko04120,ko04111,ko04113	Progesterone-mediated oocyte maturation|Oocyte meiosis|Cell cycle|Ubiquitin mediated proteolysis|Cell cycle - yeast|Meiosis - yeast
ANAPC13	535.46	0.108568	-0.0977529	0.992671	-0.0106128	0.922128	0.984546	27.714	31.9838	30.6129	29.1722	31.9801	29.495	GeneID:100415776,Genbank:XM_021068374.1	anaphase promoting complex subunit 13		GO:0005680,GO:0007049,GO:0051301,GO:0070979	anaphase-promoting complex|cell cycle|cell division|protein K11-linked ubiquitination	ko04120,ko04914,ko04114,ko04110	Ubiquitin mediated proteolysis|Progesterone-mediated oocyte maturation|Oocyte meiosis|Cell cycle
ANAPC15	1011.83	0.106112	1.18193	1.09082	0.125417	0.237232	0.739859	19.1511	23.6042	19.1753	19.7616	23.711	24.8291	GeneID:100520682,Genbank:XM_005653676.3	anaphase promoting complex subunit 15		GO:0005680,GO:0007049,GO:0051301,GO:0090266	anaphase-promoting complex|cell cycle|cell division|regulation of mitotic cell cycle spindle assembly checkpoint
ANAPC16	669.312	0.0972901	0.496594	1.03406	0.0483137	0.619475	0.931461	29.4297	28.0019	27.6546	27.2913	30.9993	30.6768	GeneID:100155019,Genbank:NM_001190225.1	anaphase promoting complex subunit 16		GO:0000776,GO:0000777,GO:0005654,GO:0005680,GO:0005829,GO:0016567,GO:0031145,GO:0042787,GO:0043161,GO:0051301,GO:0051436,GO:0051437,GO:0051439	kinetochore|condensed chromosome kinetochore|nucleoplasm|anaphase-promoting complex|cytosol|protein ubiquitination|anaphase-promoting complex-dependent catabolic process|protein ubiquitination involved in ubiquitin-dependent protein catabolic process|proteasome-mediated ubiquitin-dependent protein catabolic process|cell division|negative regulation of ubiquitin-protein ligase activity involved in…
ANAPC4	335.521	0.13801	-0.179273	0.982997	-0.0247414	0.857723	0.97824	4.07383	5.27742	5.04636	4.98263	4.62037	4.7014	GeneID:100518619,Genbank:XM_021101074.1	anaphase promoting complex subunit 4		GO:0004842,GO:0005634,GO:0005654,GO:0005680,GO:0005829,GO:0019903,GO:0030071,GO:0031145,GO:0042787,GO:0043161,GO:0051301,GO:0051436,GO:0051437,GO:0051439,GO:0070979	ubiquitin-protein transferase activity|nucleus|nucleoplasm|anaphase-promoting complex|cytosol|protein phosphatase binding|regulation of mitotic metaphase/anaphase transition|anaphase-promoting complex-dependent catabolic process|protein ubiquitination involved in ubiquitin-dependent protein catabolic process|proteasome-mediated ubiquitin-dependent protein catabolic process|cell division|negative …	ko04914,ko04114,ko04110,ko04120,ko04111,ko04113	Progesterone-mediated oocyte maturation|Oocyte meiosis|Cell cycle|Ubiquitin mediated proteolysis|Cell cycle - yeast|Meiosis - yeast
ANAPC5	382.696	0.129095	-0.660031	0.942649	-0.0852067	0.509234	0.905931	5.92334	5.43747	6.50607	5.24679	5.43642	6.34547	GeneID:100152087,Genbank:XM_001929287.5	anaphase promoting complex subunit 5		GO:0005634,GO:0005654,GO:0005680,GO:0005829,GO:0019903,GO:0031145,GO:0042787,GO:0043161,GO:0051301,GO:0051436,GO:0051437,GO:0051439,GO:0070979	nucleus|nucleoplasm|anaphase-promoting complex|cytosol|protein phosphatase binding|anaphase-promoting complex-dependent catabolic process|protein ubiquitination involved in ubiquitin-dependent protein catabolic process|proteasome-mediated ubiquitin-dependent protein catabolic process|cell division|negative regulation of ubiquitin-protein ligase activity involved in mitotic cell cycle|positive reg…	ko04914,ko04114,ko04110,ko04120,ko04111,ko04113	Progesterone-mediated oocyte maturation|Oocyte meiosis|Cell cycle|Ubiquitin mediated proteolysis|Cell cycle - yeast|Meiosis - yeast
ANAPC7	828.185	0.0876343	0.162573	1.00992	0.014247	0.870855	0.980817	7.30974	7.68636	7.80528	7.67169	7.94712	7.66548	GeneID:100155743,Genbank:XM_021072834.1	anaphase promoting complex subunit 7		GO:0005634,GO:0005654,GO:0005680,GO:0005829,GO:0019903,GO:0031145,GO:0042787,GO:0043161,GO:0051301,GO:0051436,GO:0051437,GO:0051439,GO:0070979	nucleus|nucleoplasm|anaphase-promoting complex|cytosol|protein phosphatase binding|anaphase-promoting complex-dependent catabolic process|protein ubiquitination involved in ubiquitin-dependent protein catabolic process|proteasome-mediated ubiquitin-dependent protein catabolic process|cell division|negative regulation of ubiquitin-protein ligase activity involved in mitotic cell cycle|positive reg…	ko04914,ko04114,ko04110,ko04120,ko04111,ko04113	Progesterone-mediated oocyte maturation|Oocyte meiosis|Cell cycle|Ubiquitin mediated proteolysis|Cell cycle - yeast|Meiosis - yeast
ANG	61.2733	0.303961	2.01657	1.52939	0.612959	0.0437404	0.383724	3.05646	2.85371	3.71356	6.50652	4.43123	3.94862	GeneID:733639,Genbank:XM_021098367.1	angiogenin		GO:0001525,GO:0003677,GO:0004519,GO:0004540,GO:0005576,GO:0005634,GO:0005730,GO:0017148,GO:0030154,GO:0030426,GO:0031410,GO:0042803,GO:0043025	angiogenesis|DNA binding|endonuclease activity|ribonuclease activity|extracellular region|nucleus|nucleolus|negative regulation of translation|cell differentiation|growth cone|cytoplasmic vesicle|protein homodimerization activity|neuronal cell body
ANGEL1	452.526	0.113264	0.314038	1.02496	0.0355691	0.753492	0.957923	3.4739	3.12431	3.30043	3.27896	3.30476	3.67304	GeneID:100154390,Genbank:XM_021099540.1	angel homolog 1		GO:0005634,GO:0005783,GO:0005801,GO:0005829,GO:0008190,GO:0019904,GO:0048471	nucleus|endoplasmic reticulum|cis-Golgi network|cytosol|eukaryotic initiation factor 4E binding|protein domain specific binding|perinuclear region of cytoplasm
ANGEL2	595.169	0.108758	-1.76861	0.875179	-0.192351	0.0769588	0.492699	3.99762	4.57638	4.54386	4.20014	3.76511	3.64085	GeneID:100523200,Genbank:XM_013979952.2	angel homolog 2		GO:0003730,GO:0005737,GO:0015030,GO:0045930,GO:0070935	mRNA 3'-UTR binding|cytoplasm|Cajal body|negative regulation of mitotic cell cycle|3'-UTR-mediated mRNA stabilization
ANGPT1	223.473	0.19479	-2.44035	0.71929	-0.475355	0.014673	0.218391	2.26833	2.49707	3.56001	1.65597	2.42624	1.98128	GeneID:397009,Genbank:XM_021088688.1	angiopoietin 1		GO:0001525,GO:0005576,GO:0030154,GO:0030971,GO:0048014	angiogenesis|extracellular region|cell differentiation|receptor tyrosine kinase binding|Tie signaling pathway	ko04014,ko04151,ko04066,ko04015	Ras signaling pathway|PI3K-Akt signaling pathway|HIF-1 signaling pathway|Rap1 signaling pathway
ANGPT2	255.923	0.146999	0.167867	1.01725	0.0246762	0.866688	0.979791	1.71313	1.51089	1.39508	1.64207	1.48683	1.62018	GeneID:396730,Genbank:XM_005671650.3	angiopoietin 2		GO:0001525,GO:0005576,GO:0030154,GO:0030971,GO:0046872	angiogenesis|extracellular region|cell differentiation|receptor tyrosine kinase binding|metal ion binding	ko04014,ko04151,ko04066,ko04015	Ras signaling pathway|PI3K-Akt signaling pathway|HIF-1 signaling pathway|Rap1 signaling pathway
ANGPT4	20.2321	0.502164	0.297938	1.10927	0.149614	0.765751	0.960758	0.169145	0.207558	0.129795	0.145545	0.270915	0.152257	GeneID:100515978,Genbank:XM_013985210.2	angiopoietin 4		GO:0001525,GO:0005576,GO:0030971	angiogenesis|extracellular region|receptor tyrosine kinase binding	ko04014,ko04151,ko04066,ko04015	Ras signaling pathway|PI3K-Akt signaling pathway|HIF-1 signaling pathway|Rap1 signaling pathway
ANGPTL1	65.6803	0.30062	-0.443367	0.911753	-0.133285	0.6575	0.937251	0.565421	0.404975	0.689456	0.633155	0.496231	0.402836	GeneID:100126165,Genbank:XM_005667787.3	angiopoietin like 1		GO:0005102,GO:0005615,GO:0007169	receptor binding|extracellular space|transmembrane receptor protein tyrosine kinase signaling pathway
ANGPTL2	285.072	0.139127	3.16009	1.35628	0.439655	0.0015772	0.0562439	3.71205	3.68496	4.09371	5.38353	5.51193	4.86911	GeneID:100126164,Genbank:XM_005660427.3	angiopoietin like 2		GO:0005102,GO:0005615,GO:0007275,GO:0070062	receptor binding|extracellular space|multicellular organism development|extracellular exosome
ANGPTL4	20.4423	0.482372	-0.898988	0.740388	-0.433647	0.368659	0.836927	0.642122	0.946191	0.656985	0.559107	0.506636	0.611651	GeneID:397628,Genbank:NM_001038644.1	angiopoietin like 4		GO:0001525,GO:0004857,GO:0005578,GO:0005615,GO:0030154,GO:0042802,GO:0051005,GO:0070328,GO:2000352	angiogenesis|enzyme inhibitor activity|proteinaceous extracellular matrix|extracellular space|cell differentiation|identical protein binding|negative regulation of lipoprotein lipase activity|triglyceride homeostasis|negative regulation of endothelial cell apoptotic process	ko03320	PPAR signaling pathway
ANGPTL5	38.9379	0.38071	-1.68264	0.641446	-0.640599	0.0924441	0.532752	0.986418	2.00324	1.72549	1.09521	0.843562	1.11389	GeneID:100519911,Genbank:XM_003129804.4	angiopoietin like 5		GO:0005576	extracellular region
ANGPTL6	20.0702	0.524375	0.962001	1.41858	0.504449	0.336049	0.81703	0.352629	0.645036	0.30925	0.894028	0.44516	0.529036	GeneID:100126233,Genbank:XM_005654853.3	angiopoietin like 6		GO:0001525,GO:0030141,GO:0030154,GO:0070062	angiogenesis|secretory granule|cell differentiation|extracellular exosome
ANGPTL7	34.7766	0.432923	-0.583043	0.839491	-0.252413	0.559864	0.920183	2.48418	1.90053	1.15095	2.41989	1.24258	1.03135	GeneID:100217376,Genbank:NM_001142828.2	angiopoietin like 7		GO:0005576	extracellular region
ANK1	650.884	0.114021	0.573885	1.0464	0.0654351	0.566045	0.92259	6.40083	6.37464	4.89355	6.54045	6.06874	6.07296	GeneID:100157679,Genbank:XM_021078313.1	ankyrin 1
ANK2	18038.3	0.0598867	0.777465	1.0328	0.0465598	0.436885	0.870458	64.5062	63.483	65.5955	72.7484	63.3024	66.0371	GeneID:100512728,Genbank:XM_021100703.1	ankyrin 2
ANK3	6685.36	0.0649236	-0.385758	0.98279	-0.0250448	0.699676	0.94301	21.0877	20.1106	22.226	21.8007	19.3514	21.8685	GeneID:100154687,Genbank:XM_005671012.3	ankyrin 3
ANKDD1A	14.2006	0.599093	0.565182	1.26453	0.338596	0.57195	0.923581	0.0991429	0.10579	0.182588	0.234602	0.142368	0.118992	GeneID:100515000,Genbank:XM_013992888.2	ankyrin repeat and death domain containing 1A		GO:0007165	signal transduction
ANKDD1B	20.1238	0.486273	1.80335	1.83645	0.876923	0.0713326	0.475678	0.217473	0.267754	0.256739	0.395851	0.461964	0.51868	GeneID:100518825,Genbank:XM_013994918.2	ankyrin repeat and death domain containing 1B		GO:0007165	signal transduction
ANKEF1	9.53223	0.729622	-0.459387	0.792686	-0.335178	0.645957	0.937018	0.116053	0.268307	0.257269	0.104021	0.256385	0.154764	GeneID:100517504,Genbank:XM_005672697.3	ankyrin repeat and EF-hand domain containing 1		GO:0005509	calcium ion binding
ANKFN1	121.991	0.202622	3.40246	1.61263	0.689414	0.00066781	0.0338458	0.318938	0.375127	0.363402	0.569146	0.548467	0.605363	GeneID:100525181,Genbank:XM_021067257.1	ankyrin repeat and fibronectin type III domain containing 1
ANKFY1	1047.27	0.089112	1.33668	1.08607	0.119114	0.181328	0.682146	7.23232	7.21759	8.13674	8.57707	7.67852	8.54484	GeneID:100522641,Genbank:XM_013981229.2	ankyrin repeat and FYVE domain containing 1		GO:0005765,GO:0005768,GO:0005769,GO:0005829,GO:0006897,GO:0010008,GO:0016020,GO:0017137,GO:0032439,GO:0034058,GO:0042147,GO:0043231,GO:0044354,GO:0046872,GO:0048549,GO:0070062,GO:0090160,GO:1901981	lysosomal membrane|endosome|early endosome|cytosol|endocytosis|endosome membrane|membrane|Rab GTPase binding|endosome localization|endosomal vesicle fusion|retrograde transport, endosome to Golgi|intracellular membrane-bounded organelle|macropinosome|metal ion binding|positive regulation of pinocytosis|extracellular exosome|Golgi to lysosome transport|phosphatidylinositol phosphate binding
ANKH	3317.89	0.0564114	-0.868666	0.966604	-0.0490027	0.38503	0.847566	14.6788	14.6929	14.3772	14.0872	14.2792	14.3866	GeneID:100624458,Genbank:XM_003359727.5	ANKH inorganic pyrophosphate transport regulator		GO:0001501,GO:0005315,GO:0005886,GO:0005887,GO:0007626,GO:0015114,GO:0016021,GO:0019867,GO:0030500,GO:0030504,GO:0055085	skeletal system development|inorganic phosphate transmembrane transporter activity|plasma membrane|integral component of plasma membrane|locomotory behavior|phosphate ion transmembrane transporter activity|integral component of membrane|outer membrane|regulation of bone mineralization|inorganic diphosphate transmembrane transporter activity|transmembrane transport
ANKHD1	770.55	0.104047	0.535576	1.03938	0.0557251	0.592252	0.929603	4.90475	5.40828	5.77905	6.08995	5.71921	5.10347	GeneID:100512270,Genbank:NM_001203267.1	ankyrin repeat and KH domain containing 1		GO:0003723,GO:0005737,GO:0045087	RNA binding|cytoplasm|innate immune response
ANKIB1	1062.05	0.0861924	1.40876	1.08781	0.121424	0.158906	0.652991	9.42729	8.62631	9.8341	10.6497	9.72501	10.2981	GeneID:100517844,Genbank:XM_003130136.4	ankyrin repeat and IBR domain containing 1		GO:0000151,GO:0000209,GO:0005737,GO:0031624,GO:0032436,GO:0042787,GO:0046872,GO:0061630	ubiquitin ligase complex|protein polyubiquitination|cytoplasm|ubiquitin conjugating enzyme binding|positive regulation of proteasomal ubiquitin-dependent protein catabolic process|protein ubiquitination involved in ubiquitin-dependent protein catabolic process|metal ion binding|ubiquitin protein ligase activity
ANKLE1	3.83659	1.15746	-0.549853	0.643302	-0.636432	0.58242	0.92735	0.0541675	0.130048	0.0138553	0.0291311	0.0448752	0.054177	GeneID:100620785,Genbank:XM_021083569.1	ankyrin repeat and LEM domain containing 1		GO:0004519,GO:0005639,GO:0005737,GO:0006281,GO:0006611,GO:0006998,GO:0031490,GO:0070197,GO:0090305,GO:2001022	endonuclease activity|integral component of nuclear inner membrane|cytoplasm|DNA repair|protein export from nucleus|nuclear envelope organization|chromatin DNA binding|meiotic attachment of telomere to nuclear envelope|nucleic acid phosphodiester bond hydrolysis|positive regulation of response to DNA damage stimulus
ANKLE2	981.482	0.085848	-1.61844	0.908186	-0.13894	0.105567	0.561384	13.0039	12.2561	13.146	11.2872	11.3276	12.6476	GeneID:100624394,Genbank:XM_021073938.1	ankyrin repeat and LEM domain containing 2		GO:0005789,GO:0007084,GO:0007417,GO:0016020,GO:0019888,GO:0030176,GO:0035307,GO:0042326,GO:0043066,GO:0050790,GO:0051301,GO:0051721	endoplasmic reticulum membrane|mitotic nuclear envelope reassembly|central nervous system development|membrane|protein phosphatase regulator activity|integral component of endoplasmic reticulum membrane|positive regulation of protein dephosphorylation|negative regulation of phosphorylation|negative regulation of apoptotic process|regulation of catalytic activity|cell division|protein phosphatase …
ANKMY1	30.0935	0.41438	0.354867	1.1073	0.14705	0.722689	0.949107	0.501795	0.368113	0.529453	0.607192	0.346427	0.611669	GeneID:100526143,Genbank:XM_021075943.1	ankyrin repeat and MYND domain containing 1		GO:0046872	metal ion binding
ANKMY2	1413.6	0.0805074	-3.87346	0.805612	-0.311842	0.000107301	0.0101714	35.1035	32.5743	35.8944	28.2779	29.8363	26.274	GeneID:100627896,Genbank:NM_001243401.1	ankyrin repeat and MYND domain containing 2		GO:0005929,GO:0008589,GO:0019899,GO:0046872	cilium|regulation of smoothened signaling pathway|enzyme binding|metal ion binding
ANKRA2	408.464	0.141976	0.313084	1.03129	0.0444504	0.754217	0.958321	12.6812	11.6941	9.98269	10.2298	11.2001	14.3781	GeneID:100515129,Genbank:XM_003123692.6	ankyrin repeat family A member 2		GO:0003712,GO:0005634,GO:0005829,GO:0005856,GO:0006357,GO:0016020,GO:0019901,GO:0031625,GO:0042826,GO:0043254,GO:0050750,GO:1990393	transcription cofactor activity|nucleus|cytosol|cytoskeleton|regulation of transcription from RNA polymerase II promoter|membrane|protein kinase binding|ubiquitin protein ligase binding|histone deacetylase binding|regulation of protein complex assembly|low-density lipoprotein particle receptor binding|3M complex
ANKRD10	968.101	0.0860815	2.89257	1.18838	0.248997	0.00382103	0.0963634	11.54	11.3244	10.846	12.5435	14.3371	13.6283	GeneID:100154231,Genbank:NM_001244616.1	ankyrin repeat domain 10		GO:0060828	regulation of canonical Wnt signaling pathway
ANKRD11	1564.96	0.0799704	1.51827	1.0878	0.121417	0.128945	0.599716	10.1978	8.55068	9.04917	10.0493	9.90074	10.6211	GeneID:100627188,Genbank:XM_021097040.1	ankyrin repeat domain 11		GO:0001701,GO:0001894,GO:0005634,GO:0005654,GO:0005829,GO:0005886,GO:0035264,GO:0042475,GO:0048705,GO:0060325,GO:0060348	in utero embryonic development|tissue homeostasis|nucleus|nucleoplasm|cytosol|plasma membrane|multicellular organism growth|odontogenesis of dentin-containing tooth|skeletal system morphogenesis|face morphogenesis|bone development
ANKRD12	1431.55	0.0917067	-1.48644	0.909839	-0.136317	0.137162	0.616763	8.83134	9.28076	10.3417	9.22434	7.70742	9.24018	GeneID:100519490,Genbank:XM_021096065.1	ankyrin repeat domain 12		GO:0005654,GO:0005829	nucleoplasm|cytosol
ANKRD13A	890.801	0.103347	3.14812	1.25297	0.325349	0.00164325	0.0583354	13.122	10.8249	10.1116	13.7137	13.9008	15.5231	GeneID:100522465,Genbank:XM_021074290.1	ankyrin repeat domain 13A		GO:0005737,GO:0005770,GO:0005886	cytoplasm|late endosome|plasma membrane
ANKRD13B	980.448	0.0810957	1.14647	1.06657	0.092974	0.2516	0.752061	17.3306	17.2191	16.7054	18.5291	18.6467	18.0948	GeneID:100520696,Genbank:XM_021067511.1	ankyrin repeat domain 13B		GO:0005737,GO:0005769,GO:0005770,GO:0005886,GO:0043231	cytoplasm|early endosome|late endosome|plasma membrane|intracellular membrane-bounded organelle
ANKRD13C	580.279	0.1048	-0.357724	0.974349	-0.0374894	0.72055	0.948431	7.29975	8.47969	7.98517	7.67058	7.56295	8.16835	GeneID:100515670,Genbank:XM_003127927.5	ankyrin repeat domain 13C		GO:0005102,GO:0005783,GO:0005789,GO:0006621,GO:0010869,GO:0048471,GO:2000209	receptor binding|endoplasmic reticulum|endoplasmic reticulum membrane|protein retention in ER lumen|regulation of receptor biosynthetic process|perinuclear region of cytoplasm|regulation of anoikis
ANKRD13D	436.393	0.129656	0.459469	1.04216	0.0595728	0.645897	0.937018	10.2637	11.1904	8.39644	10.8231	11.115	9.50508	GeneID:100515297,Genbank:XM_013994042.2	ankyrin repeat domain 13D		GO:0005737,GO:0005770,GO:0005886	cytoplasm|late endosome|plasma membrane	ko04360,ko04810	Axon guidance|Regulation of actin cytoskeleton
ANKRD16	66.9358	0.277592	1.28202	1.27976	0.355879	0.199836	0.701237	0.523852	0.531025	0.54491	0.826395	0.694378	0.550141	GeneID:100622390,Genbank:XM_005668213.3	ankyrin repeat domain 16
ANKRD17	3082.59	0.059107	-0.428862	0.982583	-0.0253488	0.668023	0.938359	15.5355	15.1615	15.3182	15.5989	14.8316	15.2776	GeneID:100520501,Genbank:XM_021100390.1	ankyrin repeat domain 17		GO:0000785,GO:0001955,GO:0003682,GO:0003723,GO:0005634,GO:0005737,GO:0006275,GO:0016020,GO:0016032,GO:0031965,GO:0042742,GO:0043123,GO:0045087,GO:0045787,GO:0051151,GO:1900087,GO:1900245,GO:1900246	chromatin|blood vessel maturation|chromatin binding|RNA binding|nucleus|cytoplasm|regulation of DNA replication|membrane|viral process|nuclear membrane|defense response to bacterium|positive regulation of I-kappaB kinase/NF-kappaB signaling|innate immune response|positive regulation of cell cycle|negative regulation of smooth muscle cell differentiation|positive regulation of G1/S transition of m…
ANKRD22	3.51714	1.13257	-0.0923859	0.930041	-0.104633	0.926391	0.985134	0.0732725	0.104247	0.0999581	0.131352	0.0809371	0.0488569	GeneID:100152630,Genbank:XM_001928460.6	ankyrin repeat domain 22
ANKRD23	17.949	0.592235	0.706263	1.33633	0.418274	0.480025	0.893647	0.603636	1.6981	0.336877	1.12146	1.33356	1.09771	GeneID:100525457,Genbank:NM_001315720.1	ankyrin repeat domain 23		GO:0005634,GO:0005654,GO:0005829,GO:0006631,GO:0015629,GO:0031432,GO:0031674,GO:0035994,GO:0060297	nucleus|nucleoplasm|cytosol|fatty acid metabolic process|actin cytoskeleton|titin binding|I band|response to muscle stretch|regulation of sarcomere organization
ANKRD24	191.861	0.188139	3.40118	1.55822	0.639897	0.000670945	0.0338956	0.802871	0.65695	0.489468	1.09176	1.0339	0.944474	GeneID:100525327,Genbank:XM_021084068.1	ankyrin repeat domain 24
ANKRD27	355.21	0.125162	-0.98614	0.918004	-0.123427	0.324065	0.806688	4.36983	4.6003	4.57886	3.9945	4.55517	4.03079	GeneID:100524146,Genbank:XM_021094270.1	ankyrin repeat domain 27		GO:0005764,GO:0005769,GO:0005770,GO:0005886,GO:0015031,GO:0030659,GO:0042470	lysosome|early endosome|late endosome|plasma membrane|protein transport|cytoplasmic vesicle membrane|melanosome
ANKRD28	1105.55	0.079135	1.19765	1.0679	0.0947757	0.231055	0.734425	4.66523	4.79049	4.51636	4.99538	5.18558	4.90457	GeneID:100152333,Genbank:XM_021068207.1	ankyrin repeat domain 28		GO:0000139,GO:0005654,GO:0005829,GO:0048208	Golgi membrane|nucleoplasm|cytosol|COPII vesicle coating
ANKRD29	282.133	0.151802	0.757067	1.08292	0.114924	0.44901	0.877922	6.7982	7.15323	6.01366	7.89604	7.87435	6.09111	GeneID:100739254,Genbank:XM_021096184.1	ankyrin repeat domain 29
ANKRD31	30.635	0.427293	-1.81085	0.584889	-0.773766	0.0701634	0.473898	0.24454	0.353525	0.355123	0.220602	0.104562	0.236693	GeneID:100627989,Genbank:XM_021084452.1	ankyrin repeat domain 31
ANKRD33B	1205.91	0.0885493	-0.792035	0.952549	-0.0701342	0.42834	0.866677	9.04411	9.2556	10.2454	9.93474	8.56766	8.98646	GeneID:100523704,Genbank:XM_003134179.4	ankyrin repeat domain 33B		GO:0003677	DNA binding
ANKRD34A	1632.45	0.0699491	-0.755146	0.964049	-0.0528217	0.450162	0.878194	21.9295	23.0121	22.4239	22.359	21.6864	21.6089	GeneID:102165219,Genbank:XM_021089935.1	ankyrin repeat domain 34A
ANKRD34B	115.092	0.240429	-0.308502	0.949887	-0.0741728	0.757701	0.959288	1.42641	1.696	1.89031	1.38812	1.2605	2.16038	GeneID:100513200,Genbank:XM_005661521.3	ankyrin repeat domain 34B		GO:0005634,GO:0005737	nucleus|cytoplasm
ANKRD34C	594.486	0.107446	-1.06826	0.923523	-0.11478	0.285404	0.77755	6.05165	6.26417	6.08447	6.26309	5.08456	5.82394	GeneID:100156422,Genbank:XM_005656254.3	ankyrin repeat domain 34C
ANKRD35	120.487	0.219956	-0.0436299	0.99337	-0.00959665	0.965199	0.993695	1.59152	1.49201	1.20964	1.7485	1.21804	1.34166	GeneID:100511691,Genbank:XM_021089942.1	ankyrin repeat domain 35
ANKRD37	25.9009	0.421355	-0.55518	0.850317	-0.233928	0.578771	0.92634	1.64591	1.52965	1.46672	1.19926	1.4662	1.32758	GeneID:100153642,Genbank:XM_013984052.2	ankyrin repeat domain 37		GO:0005634,GO:0005739,GO:0005829	nucleus|mitochondrion|cytosol
ANKRD39	365.048	0.147549	0.767195	1.08162	0.113199	0.442966	0.874176	22.9446	26.8052	18.3861	22.6057	27.8174	24.0681	GeneID:100525640,Genbank:XM_003124915.4	ankyrin repeat domain 39
ANKRD40	1378.73	0.0797878	0.794254	1.04491	0.0633718	0.427047	0.866319	20.8081	21.5873	21.5539	22.6097	24.0584	20.9028	GeneID:100512492,Genbank:XM_003131571.5	ankyrin repeat domain 40
ANKRD42	557.896	0.104442	-0.899744	0.93694	-0.0939712	0.368257	0.836927	2.00966	1.89505	2.10058	1.77737	1.98019	1.93321	GeneID:100516028,Genbank:XM_021062582.1	ankyrin repeat domain 42		GO:0005634,GO:0051059,GO:0051091,GO:0051092,GO:1900017	nucleus|NF-kappaB binding|positive regulation of DNA binding transcription factor activity|positive regulation of NF-kappaB transcription factor activity|positive regulation of cytokine production involved in inflammatory response
ANKRD44	409.528	0.123387	2.68702	1.25836	0.331545	0.00720921	0.144869	1.78335	1.84854	1.6161	1.98292	2.40992	2.28401	GeneID:100620944,Genbank:XM_021076232.1	ankyrin repeat domain 44
ANKRD46	2402.78	0.0622128	-2.36381	0.90309	-0.147059	0.0180883	0.244457	32.423	33.7781	32.9804	30.2069	30.4243	29.9254	GeneID:100152758,Genbank:XM_013996571.2	ankyrin repeat domain 46		GO:0016021	integral component of membrane
ANKRD49	123.593	0.210098	0.591732	1.09	0.124322	0.55403	0.918362	4.00266	2.95686	3.37935	4.24502	3.37012	3.7794	GeneID:100516989,Genbank:XM_003129790.4	ankyrin repeat domain 49		GO:0005634,GO:0007283,GO:0030154,GO:0045893	nucleus|spermatogenesis|cell differentiation|positive regulation of transcription, DNA-templated
ANKRD50	960.771	0.0861377	-1.82313	0.896863	-0.15704	0.0682843	0.468566	5.30268	5.40202	5.80456	5.19267	4.86576	4.9121	GeneID:100625549,Genbank:XM_021101614.1	ankyrin repeat domain 50		GO:0005768,GO:0015031,GO:1990126	endosome|protein transport|retrograde transport, endosome to plasma membrane
ANKRD52	1756.03	0.0751959	-1.00121	0.949153	-0.0752872	0.316723	0.802129	11.843	12.7874	13.1406	12.4421	12.3179	11.4891	GeneID:100519313,Genbank:XM_021092857.1	ankyrin repeat domain 52
ANKRD54	232.984	0.149707	0.60926	1.06526	0.0912106	0.542352	0.914602	6.20036	5.93164	6.69935	6.29536	6.90798	7.08354	GeneID:100525518,Genbank:XM_003126032.5	ankyrin repeat domain 54		GO:0005634,GO:0005737,GO:0006913,GO:0019887,GO:0030496,GO:0032403,GO:0045648,GO:1902531	nucleus|cytoplasm|nucleocytoplasmic transport|protein kinase regulator activity|midbody|protein complex binding|positive regulation of erythrocyte differentiation|regulation of intracellular signal transduction
ANKRD55	25.9979	0.459297	0.559782	1.19508	0.257106	0.575628	0.924908	0.149197	0.108545	0.242853	0.255301	0.194768	0.156006	GeneID:100520647,Genbank:XM_021076744.1	ankyrin repeat domain 55
ANKRD6	443.848	0.130916	0.630576	1.05889	0.0825526	0.528318	0.909894	3.16579	2.39508	3.17269	2.84688	3.31779	3.19229	GeneID:102167335,Genbank:XM_021089984.1	ankyrin repeat domain 6		GO:0005634,GO:0005737,GO:0043231,GO:0046330,GO:0090090,GO:2000096	nucleus|cytoplasm|intracellular membrane-bounded organelle|positive regulation of JNK cascade|negative regulation of canonical Wnt signaling pathway|positive regulation of Wnt signaling pathway, planar cell polarity pathway
ANKRD63	522.938	0.158539	1.89955	1.23213	0.301153	0.0574917	0.439468	3.52378	2.96966	4.0321	3.47301	3.92415	5.72534	GeneID:100627919,Genbank:XM_021097815.1	ankyrin repeat domain 63
ANKRD65	213.605	0.158624	0.774697	1.08891	0.122885	0.438519	0.871288	1.9887	1.61897	1.8681	1.91775	1.96001	2.15195	GeneID:100526225,Genbank:XM_005653352.3	ankyrin repeat domain 65
ANKRD66	8.72184	0.764115	0.974851	1.67586	0.744898	0.329634	0.811316	0.175916	0.0563131	0.125991	0.13245	0.194317	0.281515	GeneID:100155360,Genbank:XM_013978006.2	ankyrin repeat domain 66		GO:0005622	intracellular
ANKS1A	580.486	0.11186	2.11593	1.17829	0.236689	0.0343505	0.337131	2.59633	2.39103	2.79523	3.12971	3.35881	2.78861	GeneID:100625697,Genbank:XM_021098223.1	ankyrin repeat and sterile alpha motif domain containing 1A		GO:0005654,GO:0005829,GO:0006929,GO:0016322,GO:0043005,GO:0046875,GO:0048013,GO:1901187	nucleoplasm|cytosol|substrate-dependent cell migration|neuron remodeling|neuron projection|ephrin receptor binding|ephrin receptor signaling pathway|regulation of ephrin receptor signaling pathway
ANKS1B	4120.36	0.0682379	-2.1193	0.90462	-0.144617	0.034065	0.335867	24.861	22.7309	23.6566	20.163	21.1785	23.832	GeneID:100513089,Genbank:XM_021093000.1	ankyrin repeat and sterile alpha motif domain containing 1B		GO:0005829,GO:0005886,GO:0014069,GO:0015030,GO:0030054,GO:0043197,GO:0043231,GO:0045211,GO:0046875,GO:1900383	cytosol|plasma membrane|postsynaptic density|Cajal body|cell junction|dendritic spine|intracellular membrane-bounded organelle|postsynaptic membrane|ephrin receptor binding|regulation of synaptic plasticity by receptor localization to synapse
ANKS3	192.934	0.172804	0.814798	1.10252	0.1408	0.415188	0.862326	4.16619	3.90861	3.45952	4.91408	4.15735	3.78444	GeneID:100511250,Genbank:XM_021086672.1	ankyrin repeat and sterile alpha motif domain containing 3
ANKS4B	1.77438	1.70401	0.479547	1.76193	0.817154	0.631549	0.934417	0.0235482	0	0.00803109	0.00844275	0.00867047	0.0392538	GeneID:100525512,Genbank:XM_003124558.6	ankyrin repeat and sterile alpha motif domain containing 4B		GO:0005789,GO:0005886,GO:0005902,GO:0005903,GO:0030154,GO:0034976,GO:0043623,GO:1904106,GO:1904970	endoplasmic reticulum membrane|plasma membrane|microvillus|brush border|cell differentiation|response to endoplasmic reticulum stress|cellular protein complex assembly|protein localization to microvillus|brush border assembly
ANKS6	80.14	0.269001	0.64219	1.1272	0.17275	0.52075	0.908907	0.52921	0.485157	0.739741	0.55318	0.633967	0.812591	GeneID:100152629,Genbank:XM_013993702.2	ankyrin repeat and sterile alpha motif domain containing 6		GO:0005737,GO:0005929	cytoplasm|cilium
ANKUB1	9.66676	0.7101	0.751691	1.44771	0.533776	0.452237	0.879758	0.175836	0.134018	0.308411	0.243165	0.388459	0.276363	GeneID:100523093,Genbank:XM_005654029.3	ankyrin repeat and ubiquitin domain containing 1
ANKZF1	170.163	0.173166	0.295215	1.03607	0.051121	0.76783	0.960758	4.11449	3.6197	3.69471	3.67224	3.96468	4.3341	GeneID:100152759,Genbank:XM_001925639.5	ankyrin repeat and zinc finger domain containing 1		GO:0003676,GO:0005737,GO:0030433,GO:0036266,GO:0046872,GO:0070301,GO:0071630,GO:0072671	nucleic acid binding|cytoplasm|ubiquitin-dependent ERAD pathway|Cdc48p-Npl4p-Vms1p AAA ATPase complex|metal ion binding|cellular response to hydrogen peroxide|nuclear protein quality control by the ubiquitin-proteasome system|mitochondria-associated ubiquitin-dependent protein catabolic process
ANLN	1631.06	0.232586	-0.879984	0.867736	-0.204672	0.378868	0.842629	18.9194	16.8702	24.3207	18.3454	20.7644	13.6186	GeneID:100523340,Genbank:XM_021078546.1	anillin actin binding protein
ANO1	48.2403	0.333205	1.35602	1.36778	0.451833	0.175092	0.677592	0.571053	0.420998	0.329316	0.524879	0.722538	0.581537	GeneID:100738137,Genbank:XM_021082678.1	anoctamin 1		GO:0005227,GO:0005229,GO:0005247,GO:0005254,GO:0005737,GO:0005886,GO:0006812,GO:0006821,GO:0007200,GO:0007275,GO:0015111,GO:0015705,GO:0016324,GO:0034220,GO:0034605,GO:0034707,GO:0035774,GO:0046983,GO:0050965,GO:0070062,GO:1902476	calcium activated cation channel activity|intracellular calcium activated chloride channel activity|voltage-gated chloride channel activity|chloride channel activity|cytoplasm|plasma membrane|cation transport|chloride transport|phospholipase C-activating G-protein coupled receptor signaling pathway|multicellular organism development|iodide transmembrane transporter activity|iodide transport|apica…
ANO10	486.19	0.126961	-0.526433	0.954729	-0.0668367	0.598587	0.931075	8.61497	7.17299	9.54891	8.89765	7.94813	7.62101	GeneID:100511155,Genbank:XM_013981531.2	anoctamin 10		GO:0005227,GO:0005229,GO:0005622,GO:0005886,GO:0006812,GO:0006821,GO:0016020,GO:0016021,GO:0034220	calcium activated cation channel activity|intracellular calcium activated chloride channel activity|intracellular|plasma membrane|cation transport|chloride transport|membrane|integral component of membrane|ion transmembrane transport
ANO2	3.46147	1.1688	-0.85491	0.500271	-0.999219	0.392601	0.851287	0.0547409	0.0730138	0.07001	0.0294395	0.0151168	0.0547505	GeneID:100521792,Genbank:XM_021092435.1	anoctamin 2		GO:0005229,GO:0005654,GO:0005886,GO:0034220,GO:0034707,GO:0042803,GO:0046982,GO:0097730	intracellular calcium activated chloride channel activity|nucleoplasm|plasma membrane|ion transmembrane transport|chloride channel complex|protein homodimerization activity|protein heterodimerization activity|non-motile cilium	ko04740	Olfactory transduction
ANO3	1314.28	0.292578	-0.553454	0.89383	-0.161928	0.579953	0.926875	9.00778	10.8834	11.7897	7.73051	7.57559	13.3751	GeneID:100519534,Genbank:XM_013987284.2	anoctamin 3		GO:0005229,GO:0005886,GO:0016021,GO:0016048,GO:0017128,GO:0034220,GO:0046983,GO:0050982,GO:0061590,GO:0061591	intracellular calcium activated chloride channel activity|plasma membrane|integral component of membrane|detection of temperature stimulus|phospholipid scramblase activity|ion transmembrane transport|protein dimerization activity|detection of mechanical stimulus|calcium activated phosphatidylcholine scrambling|calcium activated galactosylceramide scrambling
ANO4	429.312	0.11891	1.67372	1.14792	0.199022	0.0941855	0.534955	3.31524	3.69092	3.55638	3.82055	3.93294	4.50004	GeneID:100525519,Genbank:XM_021092699.1	anoctamin 4		GO:0005229,GO:0005622,GO:0005886,GO:0016021,GO:0017128,GO:0046983,GO:0061589,GO:0061590,GO:0061591	intracellular calcium activated chloride channel activity|intracellular|plasma membrane|integral component of membrane|phospholipid scramblase activity|protein dimerization activity|calcium activated phosphatidylserine scrambling|calcium activated phosphatidylcholine scrambling|calcium activated galactosylceramide scrambling
ANO5	431.345	0.126844	0.442471	1.03967	0.0561248	0.658149	0.937251	4.32182	3.67005	3.89676	4.29019	4.58493	3.62916	GeneID:100520542,Genbank:XM_005661072.3	anoctamin 5		GO:0005229,GO:0005622,GO:0005789,GO:0005886,GO:0006821,GO:0016021,GO:0031982,GO:0034220,GO:0046983	intracellular calcium activated chloride channel activity|intracellular|endoplasmic reticulum membrane|plasma membrane|chloride transport|integral component of membrane|vesicle|ion transmembrane transport|protein dimerization activity
ANO6	304.693	0.138232	1.59265	1.16486	0.220154	0.11124	0.570199	2.55333	2.29258	1.99915	2.76309	2.66564	2.63163	GeneID:100155593,Genbank:XM_005655713.3	anoctamin 6		GO:0002407,GO:0002543,GO:0005227,GO:0005229,GO:0005244,GO:0005247,GO:0005622,GO:0005829,GO:0005886,GO:0006812,GO:0006821,GO:0007596,GO:0009986,GO:0016020,GO:0017121,GO:0017128,GO:0030501,GO:0032060,GO:0034220,GO:0034707,GO:0034767,GO:0035579,GO:0035590,GO:0035630,GO:0035725,GO:0042803,GO:0043065,GO:0043312,GO:0045794,GO:0046931,GO:0060100,GO:0061589,GO:0061590,GO:0061591,GO:0070062,GO:0070588,GO:…	dendritic cell chemotaxis|activation of blood coagulation via clotting cascade|calcium activated cation channel activity|intracellular calcium activated chloride channel activity|voltage-gated ion channel activity|voltage-gated chloride channel activity|intracellular|cytosol|plasma membrane|cation transport|chloride transport|blood coagulation|cell surface|membrane|phospholipid scrambling|phospho…
ANO7	8.61659	0.737533	-0.142538	0.929723	-0.105127	0.886655	0.980832	0.11689	0.195999	0.153765	0.107765	0.129117	0.200417	GeneID:110256996,Genbank:XM_021075267.1	anoctamin 7		GO:0005229,GO:0005622,GO:0005634,GO:0005783,GO:0005829,GO:0005886,GO:0006821,GO:0016021,GO:0017128,GO:0030054,GO:0034220,GO:0046983,GO:0061589,GO:0061590,GO:0061591	intracellular calcium activated chloride channel activity|intracellular|nucleus|endoplasmic reticulum|cytosol|plasma membrane|chloride transport|integral component of membrane|phospholipid scramblase activity|cell junction|ion transmembrane transport|protein dimerization activity|calcium activated phosphatidylserine scrambling|calcium activated phosphatidylcholine scrambling|calcium activated gal…
ANO8	502.966	0.112638	1.04134	1.0847	0.117294	0.297716	0.788041	6.97849	6.2678	5.67606	6.75	6.7657	7.23077	GeneID:110259324,Genbank:XM_021083565.1	anoctamin 8		GO:0005229,GO:0005788,GO:0005886,GO:0006821,GO:0016021,GO:0034220,GO:0043687,GO:0044267	intracellular calcium activated chloride channel activity|endoplasmic reticulum lumen|plasma membrane|chloride transport|integral component of membrane|ion transmembrane transport|post-translational protein modification|cellular protein metabolic process
ANO9	8.68039	0.781843	-0.887367	0.618231	-0.693781	0.374881	0.840165	0.404893	0.101656	0.292422	0.179323	0.105234	0.214392	GeneID:100627366,Genbank:XM_021082538.1	anoctamin 9		GO:0005229,GO:0005622,GO:0005886,GO:0006821,GO:0016021,GO:0017128,GO:0034220,GO:0061589,GO:0061590,GO:0061591,GO:1902939	intracellular calcium activated chloride channel activity|intracellular|plasma membrane|chloride transport|integral component of membrane|phospholipid scramblase activity|ion transmembrane transport|calcium activated phosphatidylserine scrambling|calcium activated phosphatidylcholine scrambling|calcium activated galactosylceramide scrambling|negative regulation of intracellular calcium activated …
ANOS1	1858.21	0.0850284	3.01529	1.19448	0.256385	0.00256735	0.0770344	21.8504	19.4555	18.3092	26.302	22.7668	22.8911	GeneID:100154011,Genbank:XM_001925070.5	anosmin 1		GO:0004867,GO:0005201,GO:0005576,GO:0005578,GO:0005615,GO:0005886,GO:0006928,GO:0006935,GO:0007155,GO:0007411,GO:0008201,GO:0008543	serine-type endopeptidase inhibitor activity|extracellular matrix structural constituent|extracellular region|proteinaceous extracellular matrix|extracellular space|plasma membrane|movement of cell or subcellular component|chemotaxis|cell adhesion|axon guidance|heparin binding|fibroblast growth factor receptor signaling pathway
ANP32A	1939.92	0.0710406	-0.726946	0.964837	-0.0516427	0.467259	0.886613	23.0836	25.5615	24.9986	24.2891	23.1635	24.3776	GeneID:100155298,Genbank:XM_003121759.6	acidic nuclear phosphoprotein 32 family member A		GO:0005634,GO:0005737,GO:0005783,GO:0006351,GO:0006355,GO:0006913,GO:0016363,GO:0042393,GO:0042981,GO:0048471	nucleus|cytoplasm|endoplasmic reticulum|transcription, DNA-templated|regulation of transcription, DNA-templated|nucleocytoplasmic transport|nuclear matrix|histone binding|regulation of apoptotic process|perinuclear region of cytoplasm
ANP32B	1264.94	0.0780076	1.2665	1.07088	0.0987963	0.205335	0.707276	40.2659	43.7441	42.5214	45.8426	46.9691	44.1874	GeneID:100152263,Genbank:XM_021066477.1	acidic nuclear phosphoprotein 32 family member B		GO:0005634,GO:0005737,GO:0005783,GO:0006334,GO:0006913,GO:0042393,GO:0043281,GO:0043486,GO:0048471	nucleus|cytoplasm|endoplasmic reticulum|nucleosome assembly|nucleocytoplasmic transport|histone binding|regulation of cysteine-type endopeptidase activity involved in apoptotic process|histone exchange|perinuclear region of cytoplasm
ANP32E	1108.21	0.0871132	-0.19674	0.988191	-0.0171387	0.844031	0.97677	16.527	18.491	17.6838	17.76	16.1661	18.7096	GeneID:100153768,Genbank:XM_021089919.1	acidic nuclear phosphoprotein 32 family member E		GO:0000812,GO:0005634,GO:0005737,GO:0006334,GO:0006913,GO:0016569,GO:0019212,GO:0031410,GO:0042393,GO:0042981,GO:0043486	Swr1 complex|nucleus|cytoplasm|nucleosome assembly|nucleocytoplasmic transport|covalent chromatin modification|phosphatase inhibitor activity|cytoplasmic vesicle|histone binding|regulation of apoptotic process|histone exchange
ANPEP	43.7737	0.33282	-0.149634	0.96607	-0.049801	0.881054	0.980832	0.611513	0.636976	0.774636	0.595096	0.771976	0.611619	GeneID:397520,Genbank:XM_005653524.3	alanyl aminopeptidase, membrane		GO:0001525,GO:0001618,GO:0005737,GO:0005886,GO:0006508,GO:0007165,GO:0007267,GO:0008217,GO:0008270,GO:0016021,GO:0030154,GO:0042277,GO:0043171,GO:0070006	angiogenesis|virus receptor activity|cytoplasm|plasma membrane|proteolysis|signal transduction|cell-cell signaling|regulation of blood pressure|zinc ion binding|integral component of membrane|cell differentiation|peptide binding|peptide catabolic process|metalloaminopeptidase activity	ko00480,ko04640,ko04614	Glutathione metabolism|Hematopoietic cell lineage|Renin-angiotensin system
ANTXR1	877.561	0.0971265	2.61737	1.19269	0.254216	0.00886093	0.164506	8.33063	8.65031	7.34849	9.81871	10.5028	9.01344	GeneID:100513853,Genbank:XM_003125066.6	anthrax toxin receptor 1		GO:0001568,GO:0004888,GO:0005518,GO:0005886,GO:0009897,GO:0009986,GO:0010008,GO:0016021,GO:0022414,GO:0031258,GO:0031527,GO:0031532,GO:0034446,GO:0046872,GO:0051015,GO:0070062,GO:1901202,GO:1905050	blood vessel development|transmembrane signaling receptor activity|collagen binding|plasma membrane|external side of plasma membrane|cell surface|endosome membrane|integral component of membrane|reproductive process|lamellipodium membrane|filopodium membrane|actin cytoskeleton reorganization|substrate adhesion-dependent cell spreading|metal ion binding|actin filament binding|extracellular exosome…
ANTXR2	431.782	0.117642	0.412858	1.03424	0.0485694	0.67971	0.940614	6.22104	6.32203	7.09247	7.12145	6.44638	6.96285	GeneID:100514416,Genbank:XM_003129371.6	anthrax toxin receptor 2		GO:0004872,GO:0005576,GO:0005789,GO:0005886,GO:0009897,GO:0010008,GO:0016021,GO:0022414,GO:0046872,GO:1901998	receptor activity|extracellular region|endoplasmic reticulum membrane|plasma membrane|external side of plasma membrane|endosome membrane|integral component of membrane|reproductive process|metal ion binding|toxin transport
ANXA1	546.15	0.138016	-0.725219	0.932974	-0.100092	0.468318	0.887079	25.9246	22.2241	16.6201	18.7342	20.2521	22.0783	GeneID:396942,Genbank:NM_001163998.1	annexin A1		GO:0001891,GO:0002250,GO:0002548,GO:0002685,GO:0005509,GO:0005544,GO:0005615,GO:0005634,GO:0006909,GO:0006954,GO:0007187,GO:0008360,GO:0016323,GO:0016324,GO:0016328,GO:0019834,GO:0030659,GO:0031232,GO:0031313,GO:0031514,GO:0031532,GO:0031901,GO:0032652,GO:0032743,GO:0042102,GO:0045087,GO:0045627,GO:0045629,GO:0045920,GO:0046883,GO:0050727,GO:0070062,GO:0071385,GO:0071621,GO:0090303	phagocytic cup|adaptive immune response|monocyte chemotaxis|regulation of leukocyte migration|calcium ion binding|calcium-dependent phospholipid binding|extracellular space|nucleus|phagocytosis|inflammatory response|G-protein coupled receptor signaling pathway, coupled to cyclic nucleotide second messenger|regulation of cell shape|basolateral plasma membrane|apical plasma membrane|lateral plasma …
ANXA11	1133.58	0.0895796	-1.24788	0.925443	-0.111784	0.212077	0.714501	22.0869	22.6714	25.4302	19.9784	22.9422	22.7781	GeneID:100156481,Genbank:XM_001924178.6	annexin A11		GO:0005509,GO:0005544,GO:0005635,GO:0005654,GO:0005819,GO:0030496,GO:0032506,GO:0042470,GO:0044548	calcium ion binding|calcium-dependent phospholipid binding|nuclear envelope|nucleoplasm|spindle|midbody|cytokinetic process|melanosome|S100 protein binding
ANXA13	50.1998	0.354231	0.517429	1.13547	0.183289	0.604857	0.931086	1.43053	1.21638	0.640343	1.46654	0.913533	1.38607	GeneID:100155380,Genbank:XM_013996500.2	annexin A13		GO:0001786,GO:0005509,GO:0005544,GO:0005615,GO:0005654,GO:0005886,GO:0016323,GO:0016324,GO:0030154,GO:0042997,GO:0042998,GO:0045121,GO:0070062,GO:0070382,GO:1901611	phosphatidylserine binding|calcium ion binding|calcium-dependent phospholipid binding|extracellular space|nucleoplasm|plasma membrane|basolateral plasma membrane|apical plasma membrane|cell differentiation|negative regulation of Golgi to plasma membrane protein transport|positive regulation of Golgi to plasma membrane protein transport|membrane raft|extracellular exosome|exocytic vesicle|phosphat…
ANXA2	717.499	0.120206	-0.516058	0.957913	-0.0620331	0.605814	0.931086	22.2665	27.9541	20.1109	20.415	23.1029	24.5742	GeneID:406192,Genbank:XM_005659537.2	annexin A2
ANXA3	43.0868	0.367819	-1.27338	0.722779	-0.468373	0.202883	0.704751	1.47618	0.690478	0.993108	0.913512	0.647771	0.748333	GeneID:102166512,Genbank:XM_021101481.1	annexin A3		GO:0005509,GO:0005544,GO:0005737,GO:0005829,GO:0005886,GO:0006909,GO:0010595,GO:0016020,GO:0019834,GO:0021766,GO:0030424,GO:0030425,GO:0030670,GO:0031100,GO:0042581,GO:0042742,GO:0043025,GO:0043312,GO:0045766,GO:0048306,GO:0051054,GO:0051091,GO:0051384,GO:0070062,GO:0070848	calcium ion binding|calcium-dependent phospholipid binding|cytoplasm|cytosol|plasma membrane|phagocytosis|positive regulation of endothelial cell migration|membrane|phospholipase A2 inhibitor activity|hippocampus development|axon|dendrite|phagocytic vesicle membrane|animal organ regeneration|specific granule|defense response to bacterium|neuronal cell body|neutrophil degranulation|positive regula…
ANXA4	150.539	0.189981	-0.180613	0.976497	-0.034313	0.856671	0.977976	8.20744	9.99994	9.46943	9.57917	9.83754	7.91778	GeneID:100312960,Genbank:NM_001167639.1	annexin A4		GO:0005509,GO:0005544	calcium ion binding|calcium-dependent phospholipid binding
ANXA5	1043.27	0.219815	0.541598	1.08602	0.119052	0.588095	0.928468	39.7878	26.5824	27.0169	28.7552	37.3177	36.4486	GeneID:100521982,Genbank:XM_003129218.5	annexin A5		GO:0005509,GO:0005544,GO:0005622,GO:0005829,GO:0007596,GO:0008201,GO:0016020,GO:0016021,GO:0050819,GO:0051283,GO:0060090	calcium ion binding|calcium-dependent phospholipid binding|intracellular|cytosol|blood coagulation|heparin binding|membrane|integral component of membrane|negative regulation of coagulation|negative regulation of sequestering of calcium ion|molecular adaptor activity
ANXA6	3598.31	0.0679513	1.59506	1.07802	0.108387	0.110698	0.56905	72.2553	84.7677	79.202	85.5876	85.9177	85.9656	GeneID:100515934,Genbank:XM_005672613.3	annexin A6		GO:0001725,GO:0001786,GO:0003418,GO:0004872,GO:0005262,GO:0005509,GO:0005525,GO:0005544,GO:0005737,GO:0005765,GO:0005829,GO:0005886,GO:0005925,GO:0006816,GO:0006937,GO:0008201,GO:0015276,GO:0015485,GO:0016020,GO:0016021,GO:0019899,GO:0030061,GO:0031214,GO:0031902,GO:0031982,GO:0035374,GO:0042470,GO:0042584,GO:0042802,GO:0042803,GO:0048306,GO:0048471,GO:0051015,GO:0051260,GO:0051283,GO:0051560,GO:…	stress fiber|phosphatidylserine binding|growth plate cartilage chondrocyte differentiation|receptor activity|calcium channel activity|calcium ion binding|GTP binding|calcium-dependent phospholipid binding|cytoplasm|lysosomal membrane|cytosol|plasma membrane|focal adhesion|calcium ion transport|regulation of muscle contraction|heparin binding|ligand-gated ion channel activity|cholesterol binding|m…
ANXA7	1277.29	0.0777594	1.07033	1.05939	0.0832285	0.284469	0.776759	34.8885	38.3759	36.4494	37.6172	40.0395	39.8512	GeneID:100156638,Genbank:XM_005671100.2	annexin A7		GO:0003723,GO:0005178,GO:0005509,GO:0005544,GO:0005634,GO:0005635,GO:0005789,GO:0005829,GO:0005886,GO:0006874,GO:0006914,GO:0007599,GO:0008283,GO:0008360,GO:0009651,GO:0009992,GO:0010629,GO:0014070,GO:0016020,GO:0030855,GO:0035176,GO:0048306,GO:0051592,GO:0061025,GO:0070062	RNA binding|integrin binding|calcium ion binding|calcium-dependent phospholipid binding|nucleus|nuclear envelope|endoplasmic reticulum membrane|cytosol|plasma membrane|cellular calcium ion homeostasis|autophagy|hemostasis|cell proliferation|regulation of cell shape|response to salt stress|cellular water homeostasis|negative regulation of gene expression|response to organic cyclic compound|membran…
ANXA8	11.4063	0.672083	0.276054	1.13724	0.185531	0.782507	0.962784	0.199143	0.546415	0.203753	0.367195	0.408524	0.312994	GeneID:100155930,Genbank:XM_021071957.1	annexin A8		GO:0005509,GO:0005544,GO:0007596	calcium ion binding|calcium-dependent phospholipid binding|blood coagulation
ANXA9	11.9911	0.64726	0.402691	1.19801	0.260646	0.687176	0.942933	0.0584229	0.0857174	0.104607	0.0549843	0.137135	0.109562	GeneID:100152685,Genbank:XM_021088525.1	annexin A9		GO:0005509,GO:0005544	calcium ion binding|calcium-dependent phospholipid binding
AOAH	62.0083	0.287537	0.836359	1.18139	0.240484	0.402953	0.855744	0.644848	0.471289	0.4519	0.579578	0.712301	0.583115	GeneID:100522290,Genbank:XM_013985718.2	acyloxyacyl hydrolase		GO:0003824,GO:0004465,GO:0005576,GO:0006629,GO:0006954,GO:0031410,GO:0050528	catalytic activity|lipoprotein lipase activity|extracellular region|lipid metabolic process|inflammatory response|cytoplasmic vesicle|acyloxyacyl hydrolase activity
AOC2	34.653	0.388712	0.456519	1.13089	0.177454	0.648017	0.937251	0.664674	0.432461	0.547364	0.784666	0.644664	0.454003	GeneID:100520513,Genbank:XM_003131393.4	amine oxidase, copper containing 2				ko00260,ko00950,ko00350,ko00410,ko00960,ko00360	Glycine, serine and threonine metabolism|Isoquinoline alkaloid biosynthesis|Tyrosine metabolism|beta-Alanine metabolism|Tropane, piperidine and pyridine alkaloid biosynthesis|Phenylalanine metabolism
AOX1	6.19896	1.00856	-1.07229	0.472548	-1.08147	0.28359	0.776702	0.19374	0.0147663	0.155747	0.0148846	0.0764305	0.0830457	GeneID:100523701,Genbank:NM_001308473.1	aldehyde oxidase 1		GO:0004031,GO:0004854,GO:0005506,GO:0005829,GO:0009055,GO:0009115,GO:0016614,GO:0016903,GO:0017144,GO:0042803,GO:0043546,GO:0050250,GO:0050660,GO:0051287,GO:0051537,GO:0055114,GO:0102797,GO:0102798	aldehyde oxidase activity|xanthine dehydrogenase activity|iron ion binding|cytosol|electron transfer activity|xanthine catabolic process|oxidoreductase activity, acting on CH-OH group of donors|oxidoreductase activity, acting on the aldehyde or oxo group of donors|drug metabolic process|protein homodimerization activity|molybdopterin cofactor binding|retinal oxidase activity|flavin adenine dinucl…	ko00982,ko00760,ko00380,ko00350,ko00750,ko04630,ko00830,ko00280	Drug metabolism - cytochrome P450|Nicotinate and nicotinamide metabolism|Tryptophan metabolism|Tyrosine metabolism|Vitamin B6 metabolism|Jak-STAT signaling pathway|Retinol metabolism|Valine, leucine and isoleucine degradation
AOX2	22.2877	0.485758	-0.69553	0.791215	-0.337859	0.486724	0.895701	0.351832	0.2038	0.22627	0.270305	0.133246	0.22119	GeneID:100525616,Genbank:XM_021074625.1	aldehyde oxidase 2		GO:0004031,GO:0005506,GO:0005829,GO:0009055,GO:0016614,GO:0017144,GO:0042803,GO:0043546,GO:0050250,GO:0050660,GO:0051287,GO:0051537,GO:0055114,GO:0102797,GO:0102798	aldehyde oxidase activity|iron ion binding|cytosol|electron transfer activity|oxidoreductase activity, acting on CH-OH group of donors|drug metabolic process|protein homodimerization activity|molybdopterin cofactor binding|retinal oxidase activity|flavin adenine dinucleotide binding|NAD binding|2 iron, 2 sulfur cluster binding|oxidation-reduction process|geranial:oxygen oxidoreductase activity|he…	ko00982,ko00760,ko00380,ko00350,ko00750,ko04630,ko00830,ko00280	Drug metabolism - cytochrome P450|Nicotinate and nicotinamide metabolism|Tryptophan metabolism|Tyrosine metabolism|Vitamin B6 metabolism|Jak-STAT signaling pathway|Retinol metabolism|Valine, leucine and isoleucine degradation
AP1AR	1027.39	0.0857082	-1.67449	0.905309	-0.143518	0.0940339	0.534955	17.6961	17.5734	17.7195	16.8513	14.7516	16.8811	GeneID:100513805,Genbank:XM_003482454.4	adaptor related protein complex 1 associated regulatory protein		GO:0001920,GO:0005768,GO:0005769,GO:0005770,GO:0005794,GO:0005829,GO:0015031,GO:0019894,GO:0030133,GO:0034315,GO:0034613,GO:0035650,GO:0048203,GO:1900025,GO:2000146	negative regulation of receptor recycling|endosome|early endosome|late endosome|Golgi apparatus|cytosol|protein transport|kinesin binding|transport vesicle|regulation of Arp2/3 complex-mediated actin nucleation|cellular protein localization|AP-1 adaptor complex binding|vesicle targeting, trans-Golgi to endosome|negative regulation of substrate adhesion-dependent cell spreading|negative regulation…
AP1B1	2359.66	0.0624205	-1.66539	0.930479	-0.103955	0.0958346	0.537943	32.5678	31.1499	32.4325	30.2886	30.2152	29.9535	GeneID:100157709,Genbank:XM_005657371.3	adaptor related protein complex 1 beta 1 subunit		GO:0005794,GO:0005802,GO:0005829,GO:0006886,GO:0007368,GO:0007507,GO:0016192,GO:0019901,GO:0030131,GO:0030276,GO:0030665,GO:0043231	Golgi apparatus|trans-Golgi network|cytosol|intracellular protein transport|determination of left/right symmetry|heart development|vesicle-mediated transport|protein kinase binding|clathrin adaptor complex|clathrin binding|clathrin-coated vesicle membrane|intracellular membrane-bounded organelle	ko04142	Lysosome
AP1G1	3075.39	0.0602185	-1.18574	0.951712	-0.0714035	0.235725	0.738867	26.5591	25.848	26.3147	24.5325	24.6907	26.5238	GeneID:100514713,Genbank:XM_003126897.6	adaptor related protein complex 1 gamma 1 subunit		GO:0000139,GO:0005215,GO:0005737,GO:0005765,GO:0005794,GO:0005829,GO:0006886,GO:0008565,GO:0016020,GO:0017137,GO:0019886,GO:0019894,GO:0030119,GO:0030131,GO:0030136,GO:0030659,GO:0030665,GO:0030742,GO:0032438,GO:0032588,GO:0035646,GO:0043231,GO:0043323,GO:0045954,GO:0050690,GO:0055037,GO:0090160	Golgi membrane|transporter activity|cytoplasm|lysosomal membrane|Golgi apparatus|cytosol|intracellular protein transport|protein transporter activity|membrane|Rab GTPase binding|antigen processing and presentation of exogenous peptide antigen via MHC class II|kinesin binding|AP-type membrane coat adaptor complex|clathrin adaptor complex|clathrin-coated vesicle|cytoplasmic vesicle membrane|clathri…	ko04142	Lysosome
AP1G2	49.7496	0.331055	0.700039	1.17426	0.231751	0.483903	0.894687	1.0741	0.864612	0.751922	1.09449	1.33216	0.772734	GeneID:100157682,Genbank:XM_001928657.7	adaptor related protein complex 1 gamma 2 subunit		GO:0000139,GO:0005794,GO:0005798,GO:0006886,GO:0008565,GO:0010008,GO:0016020,GO:0016032,GO:0016192,GO:0030121,GO:0030133	Golgi membrane|Golgi apparatus|Golgi-associated vesicle|intracellular protein transport|protein transporter activity|endosome membrane|membrane|viral process|vesicle-mediated transport|AP-1 adaptor complex|transport vesicle	ko04142	Lysosome
AP1M1	1283.81	0.076369	0.266934	1.01423	0.0203854	0.78952	0.96436	32.1797	29.3757	30.0984	30.6261	30.9182	32.4386	GeneID:100511918,Genbank:XM_005661197.3	adaptor related protein complex 1 mu 1 subunit		GO:0000139,GO:0005765,GO:0005829,GO:0005886,GO:0006886,GO:0016020,GO:0019886,GO:0030131,GO:0030659,GO:0030665,GO:0032438,GO:0032588,GO:0035579,GO:0035646,GO:0043312,GO:0050690,GO:0070062	Golgi membrane|lysosomal membrane|cytosol|plasma membrane|intracellular protein transport|membrane|antigen processing and presentation of exogenous peptide antigen via MHC class II|clathrin adaptor complex|cytoplasmic vesicle membrane|clathrin-coated vesicle membrane|melanosome organization|trans-Golgi network membrane|specific granule membrane|endosome to melanosome transport|neutrophil degranul…	ko04142	Lysosome
AP1M2	11.9792	0.626775	0.441578	1.21148	0.27677	0.658795	0.937251	0.384132	0.234221	0.308804	0.324633	0.48493	0.329314	GeneID:102168166,Genbank:XM_013987439.2	adaptor related protein complex 1 mu 2 subunit		GO:0005794,GO:0006886,GO:0016192,GO:0030131,GO:0030665	Golgi apparatus|intracellular protein transport|vesicle-mediated transport|clathrin adaptor complex|clathrin-coated vesicle membrane	ko04142	Lysosome
AP1S1	2851.45	0.0773877	-1.39574	0.927865	-0.108013	0.162794	0.66038	102.905	112.441	115.548	94.7341	100.969	114.816	GeneID:100624239,Genbank:XM_021086258.1	adaptor related protein complex 1 sigma 1 subunit		GO:0000139,GO:0005765,GO:0005794,GO:0005829,GO:0005905,GO:0006886,GO:0006898,GO:0008565,GO:0009615,GO:0016020,GO:0019886,GO:0030121,GO:0030659,GO:0032588,GO:0042147,GO:0043195,GO:0043231,GO:0050690,GO:0070062	Golgi membrane|lysosomal membrane|Golgi apparatus|cytosol|clathrin-coated pit|intracellular protein transport|receptor-mediated endocytosis|protein transporter activity|response to virus|membrane|antigen processing and presentation of exogenous peptide antigen via MHC class II|AP-1 adaptor complex|cytoplasmic vesicle membrane|trans-Golgi network membrane|retrograde transport, endosome to Golgi|te…	ko04142	Lysosome
AP1S2	838.559	0.101379	0.44881	1.03204	0.0455	0.653569	0.937251	10.7295	8.9437	8.60943	10.337	9.87655	9.29395	GeneID:100517795,Genbank:XM_003134953.5	adaptor related protein complex 1 sigma 2 subunit		GO:0000139,GO:0005765,GO:0005794,GO:0005829,GO:0005905,GO:0006886,GO:0008565,GO:0016192,GO:0019886,GO:0030119,GO:0030659,GO:0032588,GO:0043231,GO:0050690	Golgi membrane|lysosomal membrane|Golgi apparatus|cytosol|clathrin-coated pit|intracellular protein transport|protein transporter activity|vesicle-mediated transport|antigen processing and presentation of exogenous peptide antigen via MHC class II|AP-type membrane coat adaptor complex|cytoplasmic vesicle membrane|trans-Golgi network membrane|intracellular membrane-bounded organelle|regulation of …	ko04142	Lysosome
AP1S3	26.3069	0.479465	-0.646297	0.80671	-0.309877	0.518087	0.908294	0.263457	0.468534	0.862577	0.434504	0.446224	0.421605	GeneID:100627432,Genbank:XM_021074901.1	adaptor related protein complex 1 sigma 3 subunit		GO:0005794,GO:0005905,GO:0006605,GO:0008565,GO:0016192,GO:0030117,GO:0030659,GO:0043231	Golgi apparatus|clathrin-coated pit|protein targeting|protein transporter activity|vesicle-mediated transport|membrane coat|cytoplasmic vesicle membrane|intracellular membrane-bounded organelle	ko04142	Lysosome
AP2A1	5746.41	0.0524491	-1.50182	0.946865	-0.078769	0.133144	0.607085	98.1273	97.2296	100.251	94.473	92.5226	95.9955	GeneID:100520250,Genbank:XM_021094758.1	adaptor related protein complex 2 alpha 1 subunit		GO:0005829,GO:0005886,GO:0006886,GO:0006895,GO:0006897,GO:0007018,GO:0008022,GO:0008565,GO:0010976,GO:0016020,GO:0016323,GO:0016324,GO:0019886,GO:0019901,GO:0030122,GO:0030130,GO:0030666,GO:0030669,GO:0032403,GO:0032433,GO:0032802,GO:0034383,GO:0036020,GO:0045334,GO:0048013,GO:0048260,GO:0050690,GO:0050750,GO:0060071,GO:0061024,GO:0072583,GO:1900126	cytosol|plasma membrane|intracellular protein transport|Golgi to endosome transport|endocytosis|microtubule-based movement|protein C-terminus binding|protein transporter activity|positive regulation of neuron projection development|membrane|basolateral plasma membrane|apical plasma membrane|antigen processing and presentation of exogenous peptide antigen via MHC class II|protein kinase binding|AP…	ko04961,ko04144,ko04721	Endocrine and other factor-regulated calcium reabsorption|Endocytosis|Synaptic vesicle cycle
AP2A2	3075.72	0.0636746	-0.253787	0.988861	-0.0161598	0.79966	0.96757	23.6037	21.0836	21.5275	21.7169	21.8106	22.6688	GeneID:100513262,Genbank:XM_021082581.1	adaptor related protein complex 2 alpha 2 subunit		GO:0006886,GO:0006897,GO:0008289,GO:0008565,GO:0030122,GO:0048268	intracellular protein transport|endocytosis|lipid binding|protein transporter activity|AP-2 adaptor complex|clathrin coat assembly	ko04961,ko04144,ko04721	Endocrine and other factor-regulated calcium reabsorption|Endocytosis|Synaptic vesicle cycle
AP2B1	7411.96	0.059853	-2.19127	0.913101	-0.131154	0.0284325	0.305282	115.144	105.824	111.071	104.207	95.4857	106.807	GeneID:100620457,Genbank:XM_021066144.1	adaptor related protein complex 2 beta 1 subunit		GO:0005794,GO:0006886,GO:0016192,GO:0030131,GO:0030276,GO:0030665	Golgi apparatus|intracellular protein transport|vesicle-mediated transport|clathrin adaptor complex|clathrin binding|clathrin-coated vesicle membrane	ko04961,ko04144,ko04721	Endocrine and other factor-regulated calcium reabsorption|Endocytosis|Synaptic vesicle cycle
AP2M1	10520.5	0.0590128	-0.273735	0.988865	-0.0161539	0.784288	0.963237	296.695	335.47	306.323	319.978	307.963	310.27	GeneID:100626761,Genbank:NM_001243644.1	adaptor related protein complex 2 mu 1 subunit		GO:0002092,GO:0005048,GO:0005739,GO:0005886,GO:0006461,GO:0006886,GO:0008289,GO:0016050,GO:0016185,GO:0030122,GO:0031623,GO:0043195,GO:0044325,GO:0050750,GO:0070062,GO:0097494,GO:0097718,GO:1900244,GO:1903077	positive regulation of receptor internalization|signal sequence binding|mitochondrion|plasma membrane|protein complex assembly|intracellular protein transport|lipid binding|vesicle organization|synaptic vesicle budding from presynaptic endocytic zone membrane|AP-2 adaptor complex|receptor internalization|terminal bouton|ion channel binding|low-density lipoprotein particle receptor binding|extrace…	ko04961,ko04144,ko04721	Endocrine and other factor-regulated calcium reabsorption|Endocytosis|Synaptic vesicle cycle
AP2S1	2145.38	0.0694354	-0.989089	0.953511	-0.0686778	0.32262	0.805444	134.936	141.529	127.926	129.031	135.441	125.349	GeneID:100514408,Genbank:NM_001244453.1	adaptor related protein complex 2 sigma 1 subunit		GO:0005886,GO:0006886,GO:0006897,GO:0008565,GO:0030122	plasma membrane|intracellular protein transport|endocytosis|protein transporter activity|AP-2 adaptor complex	ko04961,ko04144,ko04721	Endocrine and other factor-regulated calcium reabsorption|Endocytosis|Synaptic vesicle cycle
AP3B1	531.781	0.112693	0.241153	1.01902	0.0271764	0.809437	0.968795	7.97551	6.78416	8.37599	7.57985	8.25042	8.0191	GeneID:100049670,Genbank:XM_021076471.1	adaptor related protein complex 3 beta 1 subunit		GO:0005794,GO:0006622,GO:0007596,GO:0008089,GO:0019903,GO:0030123,GO:0030131,GO:0030665,GO:0030742,GO:0032438,GO:0048007,GO:0048490,GO:0051138,GO:1904115	Golgi apparatus|protein targeting to lysosome|blood coagulation|anterograde axonal transport|protein phosphatase binding|AP-3 adaptor complex|clathrin adaptor complex|clathrin-coated vesicle membrane|GTP-dependent protein binding|melanosome organization|antigen processing and presentation, exogenous lipid antigen via MHC class Ib|anterograde synaptic vesicle transport|positive regulation of NK T …	ko04142	Lysosome
AP3B2	3203.69	0.060015	-2.15021	0.914437	-0.129045	0.0315385	0.323104	37.4387	39.9131	39.1836	36.0836	35.3327	36.319	GeneID:100154412,Genbank:XM_021098893.1	adaptor related protein complex 3 beta 2 subunit		GO:0005802,GO:0006886,GO:0008089,GO:0016192,GO:0030123,GO:0030131,GO:0030665,GO:0048490,GO:1904115	trans-Golgi network|intracellular protein transport|anterograde axonal transport|vesicle-mediated transport|AP-3 adaptor complex|clathrin adaptor complex|clathrin-coated vesicle membrane|anterograde synaptic vesicle transport|axon cytoplasm	ko04142	Lysosome
AP3D1	3254.61	0.0622518	-0.654119	0.97217	-0.0407201	0.513035	0.907086	38.4111	40.0568	36.6718	38.7558	37.605	36.7868	GeneID:100049700,Genbank:XM_021084197.1	adaptor related protein complex 3 delta 1 subunit		GO:0000139,GO:0005886,GO:0008089,GO:0010008,GO:0030123,GO:0035646,GO:0043195,GO:0048007,GO:0048490,GO:0048499,GO:0051138,GO:0061088,GO:0072657,GO:0098830,GO:0098943,GO:1904115	Golgi membrane|plasma membrane|anterograde axonal transport|endosome membrane|AP-3 adaptor complex|endosome to melanosome transport|terminal bouton|antigen processing and presentation, exogenous lipid antigen via MHC class Ib|anterograde synaptic vesicle transport|synaptic vesicle membrane organization|positive regulation of NK T cell differentiation|regulation of sequestering of zinc ion|protein…	ko04142	Lysosome
AP3M1	956.837	0.0818327	-0.277887	0.984361	-0.0227402	0.781099	0.962684	14.9343	14.8848	15.112	14.7152	15.3099	14.6981	GeneID:100155017,Genbank:XM_005671062.3	adaptor related protein complex 3 mu 1 subunit		GO:0005794,GO:0006886,GO:0008089,GO:0017137,GO:0030131,GO:0030659,GO:0048490,GO:1904115	Golgi apparatus|intracellular protein transport|anterograde axonal transport|Rab GTPase binding|clathrin adaptor complex|cytoplasmic vesicle membrane|anterograde synaptic vesicle transport|axon cytoplasm	ko04142	Lysosome
AP3M2	2235.03	0.0704886	-1.96326	0.908534	-0.138387	0.0496163	0.410119	38.7726	36.2827	37.5134	33.4621	32.6141	37.3174	GeneID:100525135,Genbank:XM_005657653.3	adaptor related protein complex 3 mu 2 subunit		GO:0005794,GO:0006886,GO:0008089,GO:0030119,GO:0030131,GO:0030659,GO:0048490,GO:1904115	Golgi apparatus|intracellular protein transport|anterograde axonal transport|AP-type membrane coat adaptor complex|clathrin adaptor complex|cytoplasmic vesicle membrane|anterograde synaptic vesicle transport|axon cytoplasm	ko04142	Lysosome
AP3S1	1972.46	0.0702083	-1.32182	0.937699	-0.0928028	0.186228	0.685006	39.2407	38.9449	35.8204	34.0316	36.7515	37.2932	GeneID:100736866,Genbank:XM_021084654.1	adaptor related protein complex 3 sigma 1 subunit		GO:0005215,GO:0005794,GO:0006886,GO:0008089,GO:0008286,GO:0008565,GO:0030119,GO:0030123,GO:0030133,GO:0030659,GO:0043231,GO:0048490,GO:1904115	transporter activity|Golgi apparatus|intracellular protein transport|anterograde axonal transport|insulin receptor signaling pathway|protein transporter activity|AP-type membrane coat adaptor complex|AP-3 adaptor complex|transport vesicle|cytoplasmic vesicle membrane|intracellular membrane-bounded organelle|anterograde synaptic vesicle transport|axon cytoplasm	ko04142	Lysosome
AP3S2	987.94	0.0978854	-0.00983622	0.999333	-0.000962823	0.992152	0.998367	28.9397	26.342	22.426	26.7966	24.823	26.8557	GeneID:100153862,Genbank:NM_001244548.1	adaptor-related protein complex 3, sigma 2 subunit		GO:0005794,GO:0006886,GO:0008089,GO:0008565,GO:0030123,GO:0030659,GO:0048490,GO:1904115	Golgi apparatus|intracellular protein transport|anterograde axonal transport|protein transporter activity|AP-3 adaptor complex|cytoplasmic vesicle membrane|anterograde synaptic vesicle transport|axon cytoplasm	ko04142	Lysosome
AP4B1	223.59	0.158862	-0.0688729	0.992445	-0.0109413	0.945091	0.988662	4.2108	3.66105	4.2728	4.51046	3.63679	4.03822	GeneID:100516855,Genbank:XM_021090715.1	adaptor related protein complex 4 beta 1 subunit		GO:0005802,GO:0005829,GO:0006605,GO:0008104,GO:0016192,GO:0019898,GO:0030124,GO:0030131,GO:0030276,GO:0031904,GO:0032588	trans-Golgi network|cytosol|protein targeting|protein localization|vesicle-mediated transport|extrinsic component of membrane|AP-4 adaptor complex|clathrin adaptor complex|clathrin binding|endosome lumen|trans-Golgi network membrane	ko04142	Lysosome
AP4E1	228.739	0.148251	-0.434167	0.956366	-0.0643655	0.664167	0.937771	2.01081	2.14562	2.1189	2.07038	2.00283	1.99397	GeneID:100155124,Genbank:XM_001924871.7	adaptor related protein complex 4 epsilon 1 subunit		GO:0006605,GO:0008104,GO:0016192,GO:0030124,GO:0031904,GO:0032588	protein targeting|protein localization|vesicle-mediated transport|AP-4 adaptor complex|endosome lumen|trans-Golgi network membrane	ko04142	Lysosome
AP4M1	176.934	0.17291	0.608769	1.07569	0.105262	0.542678	0.914602	5.03033	5.12499	4.9723	4.98263	6.27855	5.20176	GeneID:110259873,Genbank:XM_021086202.1	adaptor related protein complex 4 mu 1 subunit		GO:0005769,GO:0005802,GO:0005829,GO:0006605,GO:0006622,GO:0006886,GO:0006895,GO:0008104,GO:0019904,GO:0030124,GO:0030131,GO:0090160,GO:1903361	early endosome|trans-Golgi network|cytosol|protein targeting|protein targeting to lysosome|intracellular protein transport|Golgi to endosome transport|protein localization|protein domain specific binding|AP-4 adaptor complex|clathrin adaptor complex|Golgi to lysosome transport|protein localization to basolateral plasma membrane	ko04142	Lysosome
AP4S1	507.504	0.127881	-0.280164	0.975472	-0.0358278	0.779351	0.962684	2.10049	2.4659	2.19218	2.08723	1.93429	2.63976	GeneID:100154615,Genbank:XM_021098033.1	adaptor related protein complex 4 sigma 1 subunit		GO:0006605,GO:0008104,GO:0008565,GO:0016192,GO:0030124,GO:0031904,GO:0032588,GO:0043231	protein targeting|protein localization|protein transporter activity|vesicle-mediated transport|AP-4 adaptor complex|endosome lumen|trans-Golgi network membrane|intracellular membrane-bounded organelle	ko04142	Lysosome
AP5B1	116.908	0.230971	0.083423	1.01345	0.0192683	0.933515	0.987001	2.17862	1.93724	2.15829	1.48781	2.34921	2.59405	GeneID:100511736,Genbank:XM_021082823.1	adaptor related protein complex 5 beta 1 subunit		GO:0015031,GO:0016197,GO:0030119	protein transport|endosomal transport|AP-type membrane coat adaptor complex
AP5M1	411.446	0.12107	-1.37478	0.891036	-0.166444	0.1692	0.66889	2.17857	1.9548	1.98491	1.98014	1.67059	1.85931	GeneID:100153219,Genbank:XM_001927783.5	adaptor related protein complex 5 mu 1 subunit		GO:0005764,GO:0005765,GO:0005770,GO:0005829,GO:0015031,GO:0016020,GO:0016197,GO:0030119,GO:0031902	lysosome|lysosomal membrane|late endosome|cytosol|protein transport|membrane|endosomal transport|AP-type membrane coat adaptor complex|late endosome membrane
AP5S1	78.1718	0.253219	-1.11607	0.822103	-0.282609	0.264394	0.760888	1.74938	1.40993	1.82796	1.44124	1.23343	1.47048	GeneID:100524719,Genbank:XM_021077709.1	adaptor related protein complex 5 sigma 1 subunit		GO:0000724,GO:0005654,GO:0005764,GO:0005765,GO:0005770,GO:0005829,GO:0015031,GO:0016197,GO:0030119,GO:0031902	double-strand break repair via homologous recombination|nucleoplasm|lysosome|lysosomal membrane|late endosome|cytosol|protein transport|endosomal transport|AP-type membrane coat adaptor complex|late endosome membrane
AP5Z1	392.491	0.15295	2.65639	1.32528	0.406295	0.00789821	0.152376	3.99784	3.22662	2.56242	3.74134	4.62094	4.75	GeneID:100513142,Genbank:NM_001244772.1	adaptor related protein complex 5 zeta 1 subunit		GO:0000724,GO:0005634,GO:0005654,GO:0005737,GO:0015031,GO:0016197,GO:0016607,GO:0030119,GO:0044599	double-strand break repair via homologous recombination|nucleus|nucleoplasm|cytoplasm|protein transport|endosomal transport|nuclear speck|AP-type membrane coat adaptor complex|AP-5 adaptor complex
APAF1	338.43	0.137239	-1.28909	0.884594	-0.176913	0.197368	0.697358	2.33391	1.96416	2.13564	1.64066	2.0333	2.08196	GeneID:100513283,Genbank:XM_021093024.1	apoptotic peptidase activating factor 1				ko04214,ko04210,ko04215,ko04115	Apoptosis - fly|Apoptosis|Apoptosis - multiple species|p53 signaling pathway
APBA1	4212.27	0.060153	-2.04623	0.918221	-0.123087	0.0407337	0.368122	28.8627	27.0036	28.078	26.7788	26.3045	24.8399	GeneID:100513711,Genbank:XM_021064677.1	amyloid beta precursor protein binding family A member 1		GO:0001540,GO:0001701,GO:0005634,GO:0005794,GO:0005829,GO:0006461,GO:0006886,GO:0007155,GO:0007268,GO:0007269,GO:0007399,GO:0007626,GO:0008021,GO:0008088,GO:0010468,GO:0014047,GO:0014051,GO:0016020,GO:0035264,GO:0043005,GO:0048471	amyloid-beta binding|in utero embryonic development|nucleus|Golgi apparatus|cytosol|protein complex assembly|intracellular protein transport|cell adhesion|chemical synaptic transmission|neurotransmitter secretion|nervous system development|locomotory behavior|synaptic vesicle|axo-dendritic transport|regulation of gene expression|glutamate secretion|gamma-aminobutyric acid secretion|membrane|multi…
APBA2	2319.63	0.0666383	-0.209612	0.990365	-0.0139682	0.83397	0.974163	25.2228	23.3536	23.7136	23.2309	25.3054	23.8566	GeneID:100739808,Genbank:XM_021098805.1	amyloid beta precursor protein binding family A member 2		GO:0001540,GO:0001701,GO:0005546,GO:0005829,GO:0005886,GO:0007268,GO:0007626,GO:0008021,GO:0010468,GO:0015031,GO:0016079,GO:0035264	amyloid-beta binding|in utero embryonic development|phosphatidylinositol-4,5-bisphosphate binding|cytosol|plasma membrane|chemical synaptic transmission|locomotory behavior|synaptic vesicle|regulation of gene expression|protein transport|synaptic vesicle exocytosis|multicellular organism growth
APBA3	106.434	0.212316	0.244497	1.03664	0.0519106	0.806846	0.968367	2.82884	2.9046	2.97624	2.87045	3.27214	2.98949	GeneID:100521713,Genbank:XM_003123055.3	amyloid beta precursor protein binding family A member 3		GO:0001540,GO:0001701,GO:0004857,GO:0007268,GO:0010468,GO:0015031,GO:0019899,GO:0043086,GO:0048471	amyloid-beta binding|in utero embryonic development|enzyme inhibitor activity|chemical synaptic transmission|regulation of gene expression|protein transport|enzyme binding|negative regulation of catalytic activity|perinuclear region of cytoplasm
APBB1	5345.75	0.0559711	0.01956	1.00076	0.00109479	0.984394	0.9971	68.3221	63.2233	64.3203	67.3649	65.656	65.1297	GeneID:100519163,Genbank:XM_021062344.1	amyloid beta precursor protein binding family B member 1		GO:0000122,GO:0001540,GO:0003682,GO:0005634,GO:0005654,GO:0005737,GO:0005886,GO:0006302,GO:0006351,GO:0006355,GO:0006915,GO:0006974,GO:0007050,GO:0007165,GO:0007409,GO:0008134,GO:0010039,GO:0010976,GO:0016607,GO:0030027,GO:0030308,GO:0030426,GO:0032403,GO:0042393,GO:0042734,GO:0043025,GO:0043065,GO:0043197,GO:0043234,GO:0043967,GO:0044304,GO:0045202,GO:0045211,GO:0045739,GO:0045893,GO:0045944,GO:…	negative regulation of transcription from RNA polymerase II promoter|amyloid-beta binding|chromatin binding|nucleus|nucleoplasm|cytoplasm|plasma membrane|double-strand break repair|transcription, DNA-templated|regulation of transcription, DNA-templated|apoptotic process|cellular response to DNA damage stimulus|cell cycle arrest|signal transduction|axonogenesis|transcription factor binding|respons…
APBB1IP	397.452	0.122099	0.411056	1.0354	0.0501895	0.681032	0.941142	8.51063	8.41883	7.4988	9.19704	8.07369	8.2918	GeneID:100514179,Genbank:XM_003130751.6	amyloid beta precursor protein binding family B member 1 interacting protein		GO:0002291,GO:0005829,GO:0005856,GO:0005886,GO:0005925,GO:0007165,GO:0030027,GO:0042101,GO:0045785	T cell activation via T cell receptor contact with antigen bound to MHC molecule on antigen presenting cell|cytosol|cytoskeleton|plasma membrane|focal adhesion|signal transduction|lamellipodium|T cell receptor complex|positive regulation of cell adhesion	ko04015,ko04611	Rap1 signaling pathway|Platelet activation
APBB2	1871.55	0.093794	1.18691	1.08022	0.111325	0.235265	0.738689	15.1707	12.5179	13.2629	13.7233	17.0956	13.9125	GeneID:100514856,Genbank:XM_021101154.1	amyloid beta precursor protein binding family B member 2		GO:0001540,GO:0001764,GO:0005634,GO:0005737,GO:0006355,GO:0007050,GO:0007411,GO:0008134,GO:0016020,GO:0030027,GO:0030198,GO:0030308,GO:0030426,GO:0035556,GO:0043065,GO:0043066,GO:0045202	amyloid-beta binding|neuron migration|nucleus|cytoplasm|regulation of transcription, DNA-templated|cell cycle arrest|axon guidance|transcription factor binding|membrane|lamellipodium|extracellular matrix organization|negative regulation of cell growth|growth cone|intracellular signal transduction|positive regulation of apoptotic process|negative regulation of apoptotic process|synapse
APBB3	542.403	0.115748	0.97624	1.08147	0.112998	0.328945	0.811316	9.31262	7.70197	7.52387	9.06031	8.2061	9.55539	GeneID:100513399,Genbank:XM_003124011.4	amyloid beta precursor protein binding family B member 3		GO:0001540,GO:0005634,GO:0005737,GO:0005829,GO:0006355,GO:0008134,GO:0015629	amyloid-beta binding|nucleus|cytoplasm|cytosol|regulation of transcription, DNA-templated|transcription factor binding|actin cytoskeleton
APC	8366.27	0.0685946	2.86993	1.1462	0.196862	0.00410564	0.100799	53.0694	49.829	47.893	63.7874	53.7168	57.1535	GeneID:100517932,Genbank:NM_001206430.1	APC, WNT signaling pathway regulator				ko04390,ko04810,ko04310,ko04550	Hippo signaling pathway|Regulation of actin cytoskeleton|Wnt signaling pathway|Signaling pathways regulating pluripotency of stem cells
APC2	2010.32	0.0746074	1.48391	1.07976	0.110711	0.137832	0.617956	16.9559	15.9478	14.703	18.0426	16.3437	17.5659	GeneID:100579172,Genbank:NM_001206431.1	APC2, WNT signaling pathway regulator		GO:0000226,GO:0005737,GO:0005794,GO:0005829,GO:0005874,GO:0005884,GO:0008013,GO:0008017,GO:0015630,GO:0016055,GO:0016342,GO:0030496,GO:0031258,GO:0035414,GO:0045171,GO:0048471,GO:0090090,GO:0090630	microtubule cytoskeleton organization|cytoplasm|Golgi apparatus|cytosol|microtubule|actin filament|beta-catenin binding|microtubule binding|microtubule cytoskeleton|Wnt signaling pathway|catenin complex|midbody|lamellipodium membrane|negative regulation of catenin import into nucleus|intercellular bridge|perinuclear region of cytoplasm|negative regulation of canonical Wnt signaling pathway|activa…	ko04390,ko04810,ko04310,ko04550	Hippo signaling pathway|Regulation of actin cytoskeleton|Wnt signaling pathway|Signaling pathways regulating pluripotency of stem cells
APCDD1	978.144	0.102759	1.39235	1.10426	0.143076	0.163815	0.661387	20.6049	16.9753	15.2899	19.1278	20.4279	19.4615	GeneID:100626308,Genbank:XM_021096050.1	APC down-regulated 1		GO:0001942,GO:0005887,GO:0016055,GO:0017147,GO:0030178,GO:0042802,GO:0043615	hair follicle development|integral component of plasma membrane|Wnt signaling pathway|Wnt-protein binding|negative regulation of Wnt signaling pathway|identical protein binding|astrocyte cell migration
APEH	421.543	0.122159	1.01693	1.08992	0.124227	0.309189	0.798007	11.0146	8.77091	9.80375	10.281	11.1809	11.1574	GeneID:396961,Genbank:XM_005669560.2	acylaminoacyl-peptide hydrolase		GO:0004252,GO:0005737	serine-type endopeptidase activity|cytoplasm
APEX1	1554.16	0.0763652	-0.507876	0.973475	-0.038784	0.611541	0.931086	38.5523	43.9935	40.5198	39.1255	41.2309	40.761	GeneID:100154728,Genbank:XM_021098038.1	apurinic/apyrimidinic endodeoxyribonuclease 1		GO:0003677,GO:0003684,GO:0003713,GO:0003723,GO:0003906,GO:0005634,GO:0005654,GO:0005730,GO:0005737,GO:0005739,GO:0005783,GO:0006281,GO:0006284,GO:0006310,GO:0006351,GO:0006355,GO:0008081,GO:0008311,GO:0008408,GO:0016491,GO:0016607,GO:0016890,GO:0031490,GO:0042981,GO:0043488,GO:0046872,GO:0048471,GO:0080111,GO:0140078,GO:0140080	DNA binding|damaged DNA binding|transcription coactivator activity|RNA binding|DNA-(apurinic or apyrimidinic site) lyase activity|nucleus|nucleoplasm|nucleolus|cytoplasm|mitochondrion|endoplasmic reticulum|DNA repair|base-excision repair|DNA recombination|transcription, DNA-templated|regulation of transcription, DNA-templated|phosphoric diester hydrolase activity|double-stranded DNA 3'-5' exodeox…	ko03410	Base excision repair
APEX2	338.348	0.129089	-0.506345	0.955704	-0.0653636	0.612614	0.931086	10.134	9.40802	9.51603	9.65685	8.43269	9.9745	GeneID:100519003,Genbank:XM_003135109.4	apurinic/apyrimidinic endodeoxyribonuclease 2		GO:0003677,GO:0003906,GO:0004519,GO:0005634,GO:0005739,GO:0006284,GO:0006310,GO:0007049,GO:0008270,GO:0008311,GO:0140078,GO:0140080	DNA binding|DNA-(apurinic or apyrimidinic site) lyase activity|endonuclease activity|nucleus|mitochondrion|base-excision repair|DNA recombination|cell cycle|zinc ion binding|double-stranded DNA 3'-5' exodeoxyribonuclease activity|class I DNA-(apurinic or apyrimidinic site) lyase activity|class III/IV DNA-(apurinic or apyrimidinic site) lyase activity	ko03410	Base excision repair
APH1A	898.911	0.0852712	1.02517	1.06247	0.0874173	0.305283	0.794905	17.4487	17.9103	16.2808	18.4821	18.5407	18.4382	GeneID:100154978,Genbank:XM_021088563.1	aph-1 homolog A, gamma-secretase subunit		GO:0001656,GO:0004175,GO:0005783,GO:0005789,GO:0005794,GO:0005886,GO:0005887,GO:0006509,GO:0007219,GO:0007220,GO:0008233,GO:0016021,GO:0016485,GO:0031293,GO:0032580,GO:0034205,GO:0042982,GO:0042987,GO:0043085,GO:0070765	metanephros development|endopeptidase activity|endoplasmic reticulum|endoplasmic reticulum membrane|Golgi apparatus|plasma membrane|integral component of plasma membrane|membrane protein ectodomain proteolysis|Notch signaling pathway|Notch receptor processing|peptidase activity|integral component of membrane|protein processing|membrane protein intracellular domain proteolysis|Golgi cisterna membr…	ko04330	Notch signaling pathway
APH1B	437.342	0.124021	0.699987	1.06202	0.0868131	0.483936	0.894687	3.72934	3.07806	3.75043	3.80554	3.45047	4.08067	GeneID:100624829,Genbank:XM_021094173.1	aph-1 homolog B, gamma-secretase subunit		GO:0004175,GO:0005783,GO:0005886,GO:0005887,GO:0007219,GO:0007220,GO:0008233,GO:0016021,GO:0016485,GO:0030133,GO:0031293,GO:0035333,GO:0043065,GO:0043085,GO:0048013,GO:0070765	endopeptidase activity|endoplasmic reticulum|plasma membrane|integral component of plasma membrane|Notch signaling pathway|Notch receptor processing|peptidase activity|integral component of membrane|protein processing|transport vesicle|membrane protein intracellular domain proteolysis|Notch receptor processing, ligand-dependent|positive regulation of apoptotic process|positive regulation of catal…
API5	1835.88	0.0660004	-1.19677	0.946722	-0.0789871	0.231398	0.734748	29.1911	28.5917	28.799	27.9512	27.5036	27.4173	GeneID:100522006,Genbank:XM_005660984.3	apoptosis inhibitor 5		GO:0005634,GO:0005737,GO:0006915,GO:0017134,GO:0043066	nucleus|cytoplasm|apoptotic process|fibroblast growth factor binding|negative regulation of apoptotic process
APIP	238.661	0.155766	0.518687	1.0576	0.0807937	0.603979	0.931086	12.3311	11.4601	12.2095	13.9585	13.621	10.9408	GeneID:100525733,Genbank:XM_003122870.3	APAF1 interacting protein		GO:0005737,GO:0006915,GO:0008270,GO:0019509,GO:0042802,GO:0043066,GO:0046570,GO:0051289,GO:0070269,GO:0070372	cytoplasm|apoptotic process|zinc ion binding|L-methionine salvage from methylthioadenosine|identical protein binding|negative regulation of apoptotic process|methylthioribulose 1-phosphate dehydratase activity|protein homotetramerization|pyroptosis|regulation of ERK1 and ERK2 cascade	ko00270	Cysteine and methionine metabolism
APITD1	40.6004	0.349242	0.161822	1.03995	0.0565148	0.871446	0.980817	0.758469	0.590129	0.614353	0.611852	0.855261	0.600559	GeneID:100522376,Genbank:XM_021093344.1	apoptosis-inducing, TAF9-like domain 1		GO:0000712,GO:0000777,GO:0003677,GO:0003682,GO:0003690,GO:0006281,GO:0006312,GO:0006974,GO:0031297,GO:0036297,GO:0043240,GO:0046982,GO:0051301,GO:0051382,GO:0071821	resolution of meiotic recombination intermediates|condensed chromosome kinetochore|DNA binding|chromatin binding|double-stranded DNA binding|DNA repair|mitotic recombination|cellular response to DNA damage stimulus|replication fork processing|interstrand cross-link repair|Fanconi anaemia nuclear complex|protein heterodimerization activity|cell division|kinetochore assembly|FANCM-MHF complex	ko03460	Fanconi anemia pathway
APLF	682.088	0.137472	0.18176	1.01747	0.0249869	0.855771	0.977976	3.27473	3.24033	3.53071	3.88576	3.90644	2.54216	GeneID:100516073,Genbank:XM_005662500.3	aprataxin and PNKP like factor		GO:0000012,GO:0000166,GO:0003906,GO:0004520,GO:0005634,GO:0005654,GO:0005829,GO:0006302,GO:0006974,GO:0008408,GO:0035861,GO:0045191,GO:0046872,GO:0051106,GO:0140078,GO:0140080	single strand break repair|nucleotide binding|DNA-(apurinic or apyrimidinic site) lyase activity|endodeoxyribonuclease activity|nucleus|nucleoplasm|cytosol|double-strand break repair|cellular response to DNA damage stimulus|3'-5' exonuclease activity|site of double-strand break|regulation of isotype switching|metal ion binding|positive regulation of DNA ligation|class I DNA-(apurinic or apyrimidi…
APLN	430.894	0.134759	6.82536	1.89182	0.919778	8.77e-12	4.61e-08	6.48136	5.36868	4.41496	9.90262	10.8451	10.3615	GeneID:100625006,Genbank:XM_003360446.4	apelin		GO:0001664,GO:0005179,GO:0005576,GO:0005615,GO:0023052,GO:0031704,GO:0042756,GO:0045776,GO:0045823,GO:0060183,GO:0060976,GO:1904022	G-protein coupled receptor binding|hormone activity|extracellular region|extracellular space|signaling|apelin receptor binding|drinking behavior|negative regulation of blood pressure|positive regulation of heart contraction|apelin receptor signaling pathway|coronary vasculature development|positive regulation of G-protein coupled receptor internalization	ko04080	Neuroactive ligand-receptor interaction
APLP1	17525.9	0.0528056	0.390856	1.01441	0.0206394	0.695904	0.942939	422.247	397.093	422.853	403.175	438.01	432.996	GeneID:100524259,Genbank:XM_021097132.1	amyloid beta precursor like protein 1		GO:0005604,GO:0005886,GO:0006897,GO:0006915,GO:0007155,GO:0007399,GO:0008201,GO:0009887,GO:0016021,GO:0031694,GO:0031695,GO:0031696,GO:0042802,GO:0046914,GO:0048471,GO:0071874,GO:0106072	basement membrane|plasma membrane|endocytosis|apoptotic process|cell adhesion|nervous system development|heparin binding|animal organ morphogenesis|integral component of membrane|alpha-2A adrenergic receptor binding|alpha-2B adrenergic receptor binding|alpha-2C adrenergic receptor binding|identical protein binding|transition metal ion binding|perinuclear region of cytoplasm|cellular response to n…
APLP2	8610.49	0.0497571	0.411087	1.01428	0.0204545	0.681009	0.941142	129.719	132.989	132.04	136.201	134.926	133.66	GeneID:100126835,Genbank:XM_021063158.1	amyloid beta precursor like protein 2		GO:0002576,GO:0003677,GO:0004867,GO:0005634,GO:0005788,GO:0005886,GO:0007186,GO:0008201,GO:0016020,GO:0016021,GO:0031092,GO:0042802,GO:0043687,GO:0044267,GO:0046914,GO:0070062	platelet degranulation|DNA binding|serine-type endopeptidase inhibitor activity|nucleus|endoplasmic reticulum lumen|plasma membrane|G-protein coupled receptor signaling pathway|heparin binding|membrane|integral component of membrane|platelet alpha granule membrane|identical protein binding|post-translational protein modification|cellular protein metabolic process|transition metal ion binding|extr…
APMAP	1663.36	0.0696947	-1.4094	0.93418	-0.098228	0.158716	0.652725	32.7577	33.3935	32.0571	29.5517	31.0757	32.1235	GeneID:100157249,Genbank:XM_001927087.7	adipocyte plasma membrane associated protein		GO:0004064,GO:0005783,GO:0009058,GO:0009986,GO:0016020,GO:0016021,GO:0016844,GO:0070062	arylesterase activity|endoplasmic reticulum|biosynthetic process|cell surface|membrane|integral component of membrane|strictosidine synthase activity|extracellular exosome
APOA1	2495.35	0.0892369	0.427935	1.02682	0.0381876	0.668698	0.938428	162.214	159.775	157.798	142.399	193.448	162.429	GeneID:397691,Genbank:NM_214398.1	apolipoprotein A1		GO:0005615,GO:0006695,GO:0010873,GO:0010898,GO:0015485,GO:0017127,GO:0018158,GO:0018206,GO:0019433,GO:0030300,GO:0031102,GO:0031210,GO:0033344,GO:0033700,GO:0034364,GO:0034372,GO:0034380,GO:0042157,GO:0042627,GO:0042632,GO:0043691,GO:0045723,GO:0046470,GO:0051006,GO:0060228,GO:0070328,GO:0070653,GO:0072562	extracellular space|cholesterol biosynthetic process|positive regulation of cholesterol esterification|positive regulation of triglyceride catabolic process|cholesterol binding|cholesterol transporter activity|protein oxidation|peptidyl-methionine modification|triglyceride catabolic process|regulation of intestinal cholesterol absorption|neuron projection regeneration|phosphatidylcholine binding|…	ko04977,ko03320,ko04975	Vitamin digestion and absorption|PPAR signaling pathway|Fat digestion and absorption
APOBEC3B	33.6399	0.415796	0.631703	1.19969	0.26266	0.527581	0.909482	1.17292	1.13778	1.09097	0.764598	1.29561	2.06186	GeneID:100037939,Genbank:NM_001097446.1	apolipoprotein B mRNA editing enzyme catalytic subunit 3B		GO:0003723,GO:0005634,GO:0008270,GO:0010529,GO:0045087,GO:0047844,GO:0051607	RNA binding|nucleus|zinc ion binding|negative regulation of transposition|innate immune response|deoxycytidine deaminase activity|defense response to virus
APOBEC4	3.13682	1.29689	0.885816	2.2173	1.14881	0.375717	0.840543	0.0444597	0	0.0454888	0.0956409	0.0327402	0.0741124	GeneID:100515680,Genbank:XM_003130369.4	apolipoprotein B mRNA editing enzyme catalytic polypeptide like 4		GO:0006397,GO:0008270,GO:0016814	mRNA processing|zinc ion binding|hydrolase activity, acting on carbon-nitrogen (but not peptide) bonds, in cyclic amidines
APOBR	88.0327	0.27948	0.820203	1.17221	0.22923	0.4121	0.861022	0.601592	1.28385	1.04164	1.18214	1.2907	0.995114	GeneID:102163208,Genbank:XM_021088037.1	apolipoprotein B receptor		GO:0005886,GO:0006641,GO:0006869,GO:0006898,GO:0008203,GO:0016020,GO:0030229,GO:0034361,GO:0034362,GO:0034447,GO:0042627	plasma membrane|triglyceride metabolic process|lipid transport|receptor-mediated endocytosis|cholesterol metabolic process|membrane|very-low-density lipoprotein particle receptor activity|very-low-density lipoprotein particle|low-density lipoprotein particle|very-low-density lipoprotein particle clearance|chylomicron
APOD	6900.74	0.0811885	3.83091	1.24059	0.311025	0.000127672	0.0111798	153.803	120.763	147.487	181.923	184.164	163.133	GeneID:100157318,Genbank:XM_021070086.1	apolipoprotein D		GO:0000302,GO:0005615,GO:0005783,GO:0006006,GO:0006629,GO:0006869,GO:0007420,GO:0007568,GO:0010642,GO:0014012,GO:0015485,GO:0022626,GO:0030425,GO:0042246,GO:0042308,GO:0042493,GO:0043025,GO:0048471,GO:0048662,GO:0048678,GO:0051895,GO:0060588,GO:0071638,GO:1900016,GO:2000098,GO:2000405	response to reactive oxygen species|extracellular space|endoplasmic reticulum|glucose metabolic process|lipid metabolic process|lipid transport|brain development|aging|negative regulation of platelet-derived growth factor receptor signaling pathway|peripheral nervous system axon regeneration|cholesterol binding|cytosolic ribosome|dendrite|tissue regeneration|negative regulation of protein import …
APOE	22081.4	0.071136	2.71025	1.14298	0.192796	0.00672334	0.139058	1135.51	1132.19	988.579	1332.39	1296.7	1131.41	GeneID:397576,Genbank:NM_214308.1	apolipoprotein E		GO:0001540,GO:0005543,GO:0006695,GO:0006707,GO:0008201,GO:0010873,GO:0015485,GO:0017127,GO:0019433,GO:0030516,GO:0031102,GO:0032374,GO:0033344,GO:0033700,GO:0034361,GO:0034363,GO:0034364,GO:0034372,GO:0034380,GO:0042159,GO:0042627,GO:0042632,GO:0043524,GO:0043691,GO:0046889,GO:0050750,GO:0051000,GO:0060228,GO:0070326,GO:0072562,GO:1900221	amyloid-beta binding|phospholipid binding|cholesterol biosynthetic process|cholesterol catabolic process|heparin binding|positive regulation of cholesterol esterification|cholesterol binding|cholesterol transporter activity|triglyceride catabolic process|regulation of axon extension|neuron projection regeneration|regulation of cholesterol transport|cholesterol efflux|phospholipid efflux|very-low-…
APOF	3.01361	1.36138	-0.194331	0.832453	-0.264559	0.845917	0.977213	0.354073	0.251874	0	0.126946	0.325925	0.0590224	GeneID:445462,Genbank:NM_001003925.1	apolipoprotein F		GO:0005102,GO:0005319,GO:0005615,GO:0006629,GO:0006869,GO:0008203,GO:0015485,GO:0034362,GO:0034364	receptor binding|lipid transporter activity|extracellular space|lipid metabolic process|lipid transport|cholesterol metabolic process|cholesterol binding|low-density lipoprotein particle|high-density lipoprotein particle
APOLD1	756.747	0.537989	-1.56776	0.557315	-0.843436	0.116938	0.57912	5.01567	18.8701	10.2866	5.11598	7.74401	6.42569	GeneID:110260736,Genbank:XM_021092329.1	apolipoprotein L domain containing 1		GO:0001525,GO:0001666,GO:0005576,GO:0005654,GO:0005829,GO:0005886,GO:0006869,GO:0008289,GO:0016021,GO:0030154,GO:0042118,GO:0042157,GO:0045601	angiogenesis|response to hypoxia|extracellular region|nucleoplasm|cytosol|plasma membrane|lipid transport|lipid binding|integral component of membrane|cell differentiation|endothelial cell activation|lipoprotein metabolic process|regulation of endothelial cell differentiation
APOM	37.6795	0.378206	0.321376	1.0879	0.121546	0.747926	0.955641	0.79324	0.534583	1.02518	0.740939	0.783982	1.0648	GeneID:692188,Genbank:XM_021098346.1	apolipoprotein M		GO:0006869,GO:0034364	lipid transport|high-density lipoprotein particle
APOO	448.044	0.115001	-1.13326	0.913625	-0.130326	0.257104	0.755101	25.0688	24.7758	21.3659	22.0946	21.5076	22.152	GeneID:100525438,Genbank:XM_005674464.3	apolipoprotein O		GO:0000139,GO:0005576,GO:0005789,GO:0006869,GO:0031305,GO:0034361,GO:0034362,GO:0034364,GO:0042407,GO:0061617	Golgi membrane|extracellular region|endoplasmic reticulum membrane|lipid transport|integral component of mitochondrial inner membrane|very-low-density lipoprotein particle|low-density lipoprotein particle|high-density lipoprotein particle|cristae formation|MICOS complex
APOOL	72.933	0.283758	-0.468373	0.911993	-0.132905	0.639518	0.935432	2.30321	2.83253	4.15388	2.85521	3.10471	2.61597	GeneID:100153260,Genbank:XM_001925965.6	apolipoprotein O like		GO:0002576,GO:0005576,GO:0005739,GO:0031093,GO:0042407,GO:0061617	platelet degranulation|extracellular region|mitochondrion|platelet alpha granule lumen|cristae formation|MICOS complex
APP	36691.7	0.0490688	-3.07381	0.900733	-0.150828	0.00211345	0.0692542	595.686	638.077	613.676	557.373	550.32	574.872	GeneID:397663,Genbank:XM_005670305.3	amyloid beta precursor protein		GO:0001967,GO:0002265,GO:0003677,GO:0004867,GO:0005102,GO:0005615,GO:0005641,GO:0005737,GO:0005768,GO:0005790,GO:0005794,GO:0005886,GO:0005905,GO:0005911,GO:0006378,GO:0006417,GO:0006468,GO:0006878,GO:0006897,GO:0006979,GO:0007155,GO:0007176,GO:0007219,GO:0007409,GO:0007617,GO:0007626,GO:0008088,GO:0008201,GO:0008203,GO:0008285,GO:0008344,GO:0008542,GO:0009986,GO:0010629,GO:0010800,GO:0010971,GO:…	suckling behavior|astrocyte activation involved in immune response|DNA binding|serine-type endopeptidase inhibitor activity|receptor binding|extracellular space|nuclear envelope lumen|cytoplasm|endosome|smooth endoplasmic reticulum|Golgi apparatus|plasma membrane|clathrin-coated pit|cell-cell junction|mRNA polyadenylation|regulation of translation|protein phosphorylation|cellular copper ion homeo…	ko04726	Serotonergic synapse
APPBP2	2575.79	0.0678867	-1.31404	0.94004	-0.0892059	0.188833	0.688574	22.8281	22.1402	23.4409	22.7612	21.8077	20.4474	GeneID:100525889,Genbank:XM_013981135.2	amyloid beta precursor protein binding protein 2		GO:0003777,GO:0005634,GO:0005737,GO:0005874,GO:0005875,GO:0006886,GO:0030659,GO:0046907	microtubule motor activity|nucleus|cytoplasm|microtubule|microtubule associated complex|intracellular protein transport|cytoplasmic vesicle membrane|intracellular transport
APPL1	722.372	0.0952864	-1.02946	0.934267	-0.0980937	0.303263	0.793631	22.0319	18.9634	19.9748	19.1715	19.0824	19.3434	GeneID:100188978,Genbank:NM_001134966.1	adaptor protein, phosphotyrosine interacting with PH domain and leucine zipper 1		GO:0005634,GO:0005769,GO:0005829,GO:0007049,GO:0007165,GO:0008283,GO:0008286,GO:0010008,GO:0012506,GO:0031901,GO:0042802,GO:0043422,GO:0046324,GO:0070062,GO:0097192,GO:1903076	nucleus|early endosome|cytosol|cell cycle|signal transduction|cell proliferation|insulin receptor signaling pathway|endosome membrane|vesicle membrane|early endosome membrane|identical protein binding|protein kinase B binding|regulation of glucose import|extracellular exosome|extrinsic apoptotic signaling pathway in absence of ligand|regulation of protein localization to plasma membrane	ko04211	Longevity regulating pathway
APPL2	696.544	0.0975034	1.55311	1.11067	0.151433	0.120397	0.585349	12.375	11.9507	12.3699	14.7851	13.5121	12.9114	GeneID:100190991,Genbank:XM_013997990.2	adaptor protein, phosphotyrosine interacting with PH domain and leucine zipper 2		GO:0005634,GO:0007049,GO:0007165,GO:0008283,GO:0010008,GO:0031901,GO:0070062	nucleus|cell cycle|signal transduction|cell proliferation|endosome membrane|early endosome membrane|extracellular exosome
APRT	362.801	0.183484	0.826785	1.11088	0.151702	0.408359	0.859353	14.2503	13.1736	7.8612	10.5598	14.8705	14.1871	GeneID:100622001,Genbank:XM_021093642.1	adenine phosphoribosyltransferase		GO:0002055,GO:0003999,GO:0005654,GO:0005829,GO:0006166,GO:0006168,GO:0007625,GO:0016208,GO:0044209	adenine binding|adenine phosphoribosyltransferase activity|nucleoplasm|cytosol|purine ribonucleoside salvage|adenine salvage|grooming behavior|AMP binding|AMP salvage	ko00230	Purine metabolism
APTX	119.092	0.210141	2.20032	1.37781	0.462377	0.0277844	0.302861	3.16757	3.10589	2.65694	3.52979	4.60217	4.30979	GeneID:387596,Genbank:NM_213734.1	aprataxin		GO:0003677,GO:0005654,GO:0005730,GO:0006281,GO:0033699,GO:0046872,GO:0120108	DNA binding|nucleoplasm|nucleolus|DNA repair|DNA 5'-adenosine monophosphate hydrolase activity|metal ion binding|DNA-3'-diphospho-5'-guanosine diphosphatase
AQP1	34.5804	0.376287	-0.573285	0.861116	-0.21572	0.566451	0.92259	0.745782	0.65295	0.82174	0.699316	0.485827	0.745912	GeneID:407773,Genbank:XM_021078524.1	aquaporin 1 (Colton blood group)		GO:0003097,GO:0005223,GO:0005267,GO:0005372,GO:0005634,GO:0005737,GO:0005886,GO:0005887,GO:0005903,GO:0006182,GO:0006833,GO:0006884,GO:0008519,GO:0009925,GO:0015168,GO:0015250,GO:0015670,GO:0015696,GO:0015793,GO:0016323,GO:0016324,GO:0019725,GO:0021670,GO:0022857,GO:0030184,GO:0030185,GO:0030950,GO:0031526,GO:0031965,GO:0033554,GO:0034644,GO:0035377,GO:0035378,GO:0035379,GO:0042383,GO:0042493,GO:…	renal water transport|intracellular cGMP activated cation channel activity|potassium channel activity|water transmembrane transporter activity|nucleus|cytoplasm|plasma membrane|integral component of plasma membrane|brush border|cGMP biosynthetic process|water transport|cell volume homeostasis|ammonium transmembrane transporter activity|basal plasma membrane|glycerol transmembrane transporter acti…	ko04976,ko04964,ko04924	Bile secretion|Proximal tubule bicarbonate reclamation|Renin secretion
AQP10	3.31042	1.23481	-0.676361	0.560513	-0.83518	0.498811	0.903069	0.149769	0.0266351	0.153236	0.0805454	0.0827179	0.0249659	GeneID:100144620,Genbank:XM_013997036.2	aquaporin 10		GO:0005886,GO:0006833,GO:0009636,GO:0015250,GO:0015254,GO:0015265,GO:0016021	plasma membrane|water transport|response to toxic substance|water channel activity|glycerol channel activity|urea channel activity|integral component of membrane
AQP11	304.728	0.135049	0.427407	1.04082	0.057721	0.669083	0.938517	20.5766	20.6318	19.7162	19.2513	23.4505	21.4295	GeneID:100127151,Genbank:NM_001112682.1	aquaporin 11		GO:0005783,GO:0005829,GO:0005886,GO:0009986,GO:0015267,GO:0016021,GO:0030425,GO:0048388,GO:0051260,GO:0072014	endoplasmic reticulum|cytosol|plasma membrane|cell surface|channel activity|integral component of membrane|dendrite|endosomal lumen acidification|protein homooligomerization|proximal tubule development
AQP3	56.2678	0.317325	-1.87892	0.661481	-0.596229	0.0602552	0.447358	3.48992	4.65488	5.03724	2.01093	3.44194	3.36587	GeneID:100126235,Genbank:NM_001110172.1	aquaporin 3 (Gill blood group)		GO:0015267,GO:0016021	channel activity|integral component of membrane	ko04962	Vasopressin-regulated water reabsorption
AQP4	14905.2	0.0813057	1.60905	1.09492	0.130825	0.107605	0.564567	118.33	140.302	110.506	136.306	147.79	124.415	GeneID:100126277,Genbank:XM_021093187.1	aquaporin 4		GO:0005737,GO:0005887,GO:0009897,GO:0015250,GO:0016323,GO:0034220,GO:0050891,GO:0071346	cytoplasm|integral component of plasma membrane|external side of plasma membrane|water channel activity|basolateral plasma membrane|ion transmembrane transport|multicellular organismal water homeostasis|cellular response to interferon-gamma	ko04976,ko04962	Bile secretion|Vasopressin-regulated water reabsorption
AQP5	10.8221	0.68253	0.392897	1.20427	0.268164	0.694395	0.942939	0.950788	0.405814	0.583678	1.09084	0.770179	0.507176	GeneID:100126278,Genbank:NM_001110424.1	aquaporin 5		GO:0005783,GO:0005887,GO:0005902,GO:0009925,GO:0015250,GO:0015670,GO:0016324,GO:0030157,GO:0034220,GO:0042476,GO:0042802,GO:0046541,GO:0048593	endoplasmic reticulum|integral component of plasma membrane|microvillus|basal plasma membrane|water channel activity|carbon dioxide transport|apical plasma membrane|pancreatic juice secretion|ion transmembrane transport|odontogenesis|identical protein binding|saliva secretion|camera-type eye morphogenesis	ko04970	Salivary secretion
AQP6	2.17588	1.54592	0.760243	2.25836	1.17528	0.447109	0.87708	0	0.0502043	0.0481389	0.126516	0.0259857	0.0705871	GeneID:100145893,Genbank:XM_021090894.1	aquaporin 6		GO:0005253,GO:0005887,GO:0006810,GO:0006833,GO:0007588,GO:0015112,GO:0015250,GO:0016324,GO:0030658,GO:0034220,GO:0042476	anion channel activity|integral component of plasma membrane|transport|water transport|excretion|nitrate transmembrane transporter activity|water channel activity|apical plasma membrane|transport vesicle membrane|ion transmembrane transport|odontogenesis
AQR	779.205	0.0916096	0.166315	1.01062	0.0152361	0.867909	0.980081	7.12664	6.27079	6.6395	6.62372	6.95781	6.89608	GeneID:100738040,Genbank:XM_021098271.1	aquarius intron-binding spliceosomal factor		GO:0000398,GO:0003723,GO:0005654,GO:0006283,GO:0016020,GO:0071013	mRNA splicing, via spliceosome|RNA binding|nucleoplasm|transcription-coupled nucleotide-excision repair|membrane|catalytic step 2 spliceosome	ko03040	Spliceosome
AR	54.8524	0.301488	-0.28071	0.943026	-0.0846307	0.778933	0.962684	0.388105	0.266629	0.282858	0.280201	0.31125	0.303094	GeneID:397582,Genbank:XM_021079513.1	androgen receptor	ESR-like	GO:0000790,GO:0003700,GO:0004879,GO:0004882,GO:0005496,GO:0005497,GO:0005634,GO:0005737,GO:0006351,GO:0008013,GO:0008270,GO:0008284,GO:0030521,GO:0030522,GO:0042327,GO:0043565,GO:0044212,GO:0045720,GO:0045893,GO:0045944,GO:0051092,GO:1903076,GO:2001237	nuclear chromatin|DNA binding transcription factor activity|nuclear receptor activity|androgen receptor activity|steroid binding|androgen binding|nucleus|cytoplasm|transcription, DNA-templated|beta-catenin binding|zinc ion binding|positive regulation of cell proliferation|androgen receptor signaling pathway|intracellular receptor signaling pathway|positive regulation of phosphorylation|sequence-s…	ko04114	Oocyte meiosis
ARAF	396.661	0.123571	1.98901	1.18574	0.245783	0.0467	0.398746	6.90415	6.08188	6.24822	6.89692	7.8512	8.31357	GeneID:397601,Genbank:NM_214329.1	A-Raf proto-oncogene, serine/threonine kinase		GO:0004709,GO:0005524,GO:0005739,GO:0005829,GO:0007275,GO:0009968,GO:0030154,GO:0031434,GO:0032006,GO:0032434,GO:0043066,GO:0046872,GO:0070374	MAP kinase kinase kinase activity|ATP binding|mitochondrion|cytosol|multicellular organism development|negative regulation of signal transduction|cell differentiation|mitogen-activated protein kinase kinase binding|regulation of TOR signaling|regulation of proteasomal ubiquitin-dependent protein catabolic process|negative regulation of apoptotic process|metal ion binding|positive regulation of ER…	ko04730,ko04914,ko04650,ko04270,ko04810,ko04910,ko04068,ko04726,ko04720,ko04012	Long-term depression|Progesterone-mediated oocyte maturation|Natural killer cell mediated cytotoxicity|Vascular smooth muscle contraction|Regulation of actin cytoskeleton|Insulin signaling pathway|FoxO signaling pathway|Serotonergic synapse|Long-term potentiation|ErbB signaling pathway
ARAP1	654.858	0.101614	1.63685	1.1222	0.166327	0.101662	0.551409	7.3795	6.80255	6.19818	8.03968	7.61422	7.46538	GeneID:100511767,Genbank:XM_021102283.1	ArfGAP with RhoGAP domain, ankyrin repeat and PH domain 1		GO:0001921,GO:0005096,GO:0005547,GO:0005654,GO:0005794,GO:0005802,GO:0005829,GO:0005886,GO:0007165,GO:0008360,GO:0030037,GO:0031410,GO:0031702,GO:0032580,GO:0043231,GO:0043547,GO:0045742,GO:0046872,GO:0051056,GO:0051270,GO:0051491,GO:0051497	positive regulation of receptor recycling|GTPase activator activity|phosphatidylinositol-3,4,5-trisphosphate binding|nucleoplasm|Golgi apparatus|trans-Golgi network|cytosol|plasma membrane|signal transduction|regulation of cell shape|actin filament reorganization involved in cell cycle|cytoplasmic vesicle|type 1 angiotensin receptor binding|Golgi cisterna membrane|intracellular membrane-bounded o…	ko04144	Endocytosis
ARAP2	1538.17	0.0742177	-1.19402	0.940424	-0.0886175	0.232469	0.736154	8.34815	8.14822	8.86102	7.62956	8.19742	8.28813	GeneID:100521564,Genbank:XM_003128906.4	ArfGAP with RhoGAP domain, ankyrin repeat and PH domain 2		GO:0005096,GO:0005547,GO:0005829,GO:0007165,GO:0046872,GO:0051056	GTPase activator activity|phosphatidylinositol-3,4,5-trisphosphate binding|cytosol|signal transduction|metal ion binding|regulation of small GTPase mediated signal transduction	ko04144	Endocytosis
[truncated: 15,043 more rows]

## Sheet: VPA-vs-WT-DEGs
Suppl. Table S1-2, Summary of differentially expressed genes (p<0.05; |log2FC|>1)
[truncated: 107 more rows]

## Sheet: GO_DEGs
Suppl. Table S1-3, Summary of GO analysis of DEGs
[truncated: 22 more rows]

[truncated: 1 more sheets: KEGG_DEGs]
